# Supplementary material for: Computational analysis of multimorbidity between asthma, eczema and rhinitis
Source: PubMed Central journal article supplement (PMC5466323; doi:10.1371/journal.pone.0179125), 2017-06-09
Supplement: pone.0179125.s012.pdf [file pone.0179125.s012.pdf]

**Table S1. Source of disease-protein associations.** OMIM: On-line Mendelian Inheritance in Man; CTD: Comparative Toxicogenomics Database; EV84: Ensembl Variation 84.

| Source | Disease name       | Disease name in source / SNP name           | Disease-associated protein (UniProt accession)                                                                                                                                                                                                                                                                                                                                                                                                                                                                                                                                         |
|--------|--------------------|---------------------------------------------|----------------------------------------------------------------------------------------------------------------------------------------------------------------------------------------------------------------------------------------------------------------------------------------------------------------------------------------------------------------------------------------------------------------------------------------------------------------------------------------------------------------------------------------------------------------------------------------|
| CTD    | asthma             | asthma                                      | Q08462; P07550; P05091; P09917; P15514; P05089; P78540; P10415; P02818; P04040; P51671; P13500; P13501; P08571; Q6ZTQ4; Q9UI47; O95715; Q8TE73; P05305; P09488; P09211; P04440; P01909; P01920; P01912; P01911; Q29974; P17693; P09601; P50135; P80365; P05362; Q8IZI9; P29460; P35225; P01584; Q01638; P18510; O95760; P05112; P05113; Q9Y496; P08727; P09238; P14780; Q8TAX7; P10242; P35228; Q6W5P4; P01303; P15559; Q8N138; P09874; Q07343; Q08499; Q9UIL8; Q13093; P00749; P67775; Q6K0P9; Q92878; P12724; P11684; P01137; P35625; P24821; P01375; O75762; Q969D9; P15692; Q8NI36 |
| CTD    | asthma             | asthma-related traits, susceptibility to, 2 | Q6W5P4                                                                                                                                                                                                                                                                                                                                                                                                                                                                                                                                                                                 |
| CTD    | asthma             | asthma-related traits, susceptibility to, 5 | Q9Y616                                                                                                                                                                                                                                                                                                                                                                                                                                                                                                                                                                                 |
| CTD    | asthma             | asthma-related traits, susceptibility to, 7 | P36222                                                                                                                                                                                                                                                                                                                                                                                                                                                                                                                                                                                 |
| CTD    | asthma             | asthma, aspirin-induced                     | P51677; Q9Y271; Q9NS75; P04440; Q16873; Q15063; Q9Y5Y4; P43119; P35354; P21731                                                                                                                                                                                                                                                                                                                                                                                                                                                                                                         |
| CTD    | dermatitis, atopic | dermatitis, atopic                          | Q8TC94; Q7Z589; Q9BXL7; Q76M96; P51671; Q92583; O00626; O00175; P13501; P51677; P51681; P02778; P49682; P20930; P16278; P01579; Q8IZI9; P22301; P35225; P01584; O95760; P05112; P05113; P05231; P45983; Q07869; P05109; P16581; Q969D9; O95497; O95498; Q70YC5                                                                                                                                                                                                                                                                                                                         |
| CTD    | dermatitis, atopic | dermatitis, atopic, 1                       | P20930                                                                                                                                                                                                                                                                                                                                                                                                                                                                                                                                                                                 |
| CTD    | dermatitis, atopic | dermatitis, atopic, 2                       | P20930                                                                                                                                                                                                                                                                                                                                                                                                                                                                                                                                                                                 |
| CTD    | dermatitis, atopic | dermatitis, atopic, 4                       | O14543                                                                                                                                                                                                                                                                                                                                                                                                                                                                                                                                                                                 |
| CTD    | rhinitis           | rhinitis                                    | P13569; P50135; P35367; P05112; P01303; P21731; P01282                                                                                                                                                                                                                                                                                                                                                                                                                                                                                                                                 |
| CTD    | rhinitis           | rhinitis, allergic, perennial               | P02768                                                                                                                                                                                                                                                                                                                                                                                                                                                                                                                                                                                 |
| CTD    | rhinitis           | rhinitis, allergic, seasonal                | P01037                                                                                                                                                                                                                                                                                                                                                                                                                                                                                                                                                                                 |
| EV84   | asthma             | rs10036748                                  | Q15025                                                                                                                                                                                                                                                                                                                                                                                                                                                                                                                                                                                 |
| EV84   | asthma             | rs10043228 (GWAS)                           | Q9Y6G5                                                                                                                                                                                                                                                                                                                                                                                                                                                                                                                                                                                 |
| EV84   | asthma             | rs10197862 (GWAS)                           | Q13478; Q01638                                                                                                                                                                                                                                                                                                                                                                                                                                                                                                                                                                         |
| EV84   | asthma             | rs1042713                                   | P07550                                                                                                                                                                                                                                                                                                                                                                                                                                                                                                                                                                                 |
| EV84   | asthma             | rs1042714                                   | P07550                                                                                                                                                                                                                                                                                                                                                                                                                                                                                                                                                                                 |
| EV84   | asthma             | rs10512928                                  | Q08462                                                                                                                                                                                                                                                                                                                                                                                                                                                                                                                                                                                 |
| EV84   | asthma             | rs1051931                                   | Q13093                                                                                                                                                                                                                                                                                                                                                                                                                                                                                                                                                                                 |
| EV84   | asthma             | rs10734479                                  | Q9HCJ2                                                                                                                                                                                                                                                                                                                                                                                                                                                                                                                                                                                 |
| EV84   | asthma             | rs10762058 (GWAS)                           | Q9UI47                                                                                                                                                                                                                                                                                                                                                                                                                                                                                                                                                                                 |
| EV84   | asthma             | rs10781329                                  | O14986                                                                                                                                                                                                                                                                                                                                                                                                                                                                                                                                                                                 |
| EV84   | asthma             | rs10886289                                  | Q86Y37                                                                                                                                                                                                                                                                                                                                                                                                                                                                                                                                                                                 |
| EV84   | asthma             | rs10890784                                  | Q14964                                                                                                                                                                                                                                                                                                                                                                                                                                                                                                                                                                                 |
| EV84   | asthma             | rs10970976 (GWAS)                           | P21399                                                                                                                                                                                                                                                                                                                                                                                                                                                                                                                                                                                 |
| EV84   | asthma             | rs11000019 (GWAS)                           | P07602                                                                                                                                                                                                                                                                                                                                                                                                                                                                                                                                                                                 |
| EV84   | asthma             | rs1101999 (GWAS)                            | Q6K0P9                                                                                                                                                                                                                                                                                                                                                                                                                                                                                                                                                                                 |
| EV84   | asthma             | rs11064153                                  | P36941; P37088                                                                                                                                                                                                                                                                                                                                                                                                                                                                                                                                                                         |
| EV84   | asthma             | rs11071559 (GWAS)                           | P35398                                                                                                                                                                                                                                                                                                                                                                                                                                                                                                                                                                                 |
| EV84   | asthma             | rs11558538                                  | P50135                                                                                                                                                                                                                                                                                                                                                                                                                                                                                                                                                                                 |
| EV84   | asthma             | rs11696358                                  | Q9ULU4                                                                                                                                                                                                                                                                                                                                                                                                                                                                                                                                                                                 |
| EV84   | asthma             | rs121912630                                 | Q9Y616                                                                                                                                                                                                                                                                                                                                                                                                                                                                                                                                                                                 |
| EV84   | asthma             | rs12191480                                  | O60242                                                                                                                                                                                                                                                                                                                                                                                                                                                                                                                                                                                 |
| EV84   | asthma             | rs12351127                                  | O75899                                                                                                                                                                                                                                                                                                                                                                                                                                                                                                                                                                                 |

|      |        |                   |                        |
|------|--------|-------------------|------------------------|
| EV84 | asthma | rs12371373        | Q14C87                 |
| EV84 | asthma | rs12379501        | P15291                 |
| EV84 | asthma | rs12450323 (GWAS) | Q9UKT9                 |
| EV84 | asthma | rs12570188 (GWAS) | Q8WWQ2                 |
| EV84 | asthma | rs1295686 (GWAS)  | P35225                 |
| EV84 | asthma | rs13361200        | Q92608                 |
| EV84 | asthma | rs13386455        | Q53QV2                 |
| EV84 | asthma | rs13408661 (GWAS) | Q13478; Q01638         |
| EV84 | asthma | rs1357099         | Q13449                 |
| EV84 | asthma | rs1361549         | Q96IP4                 |
| EV84 | asthma | rs1367413         | P23760                 |
| EV84 | asthma | rs1422673         | Q15025                 |
| EV84 | asthma | rs1438673 (GWAS)  | Q8NI36                 |
| EV84 | asthma | rs1588265 (GWAS)  | Q08499                 |
| EV84 | asthma | rs16851020        | P30542; Q13203         |
| EV84 | asthma | rs16925863        | P23468                 |
| EV84 | asthma | rs1701704 (GWAS)  | Q9H2S9                 |
| EV84 | asthma | rs17064520        | Q96PU5                 |
| EV84 | asthma | rs17220663        | Q13224                 |
| EV84 | asthma | rs17294280 (GWAS) | P84022                 |
| EV84 | asthma | rs17525472 (GWAS) | Q8WXD2                 |
| EV84 | asthma | rs17774023        | Q96BK5                 |
| EV84 | asthma | rs1805018         | Q13093                 |
| EV84 | asthma | rs1837253 (GWAS)  | Q969D9                 |
| EV84 | asthma | rs1957018         | Q13023                 |
| EV84 | asthma | rs1999716         | Q5JR59                 |
| EV84 | asthma | rs204993 (GWAS)   | P40425; Q9Y4H4; Q15109 |
| EV84 | asthma | rs20541           | P35225                 |
| EV84 | asthma | rs2058397         | Q02930                 |
| EV84 | asthma | rs2069408 (GWAS)  | P61020; P40967; P24941 |
| EV84 | asthma | rs2071427         | P10827; P20393         |
| EV84 | asthma | rs2073643 (GWAS)  | O76082                 |
| EV84 | asthma | rs2183124         | P15291                 |
| EV84 | asthma | rs2225809         | P56975                 |
| EV84 | asthma | rs2233287         | Q15025                 |
| EV84 | asthma | rs2244012 (GWAS)  | Q92878                 |
| EV84 | asthma | rs2267616         | Q9HBI1                 |
| EV84 | asthma | rs2282032         | Q9H7Z3                 |
| EV84 | asthma | rs2284033 (GWAS)  | P14784                 |
| EV84 | asthma | rs229040          | Q9UHI8                 |
| EV84 | asthma | rs2297515         | P35228                 |
| EV84 | asthma | rs2303067         | Q9NQ38                 |
| EV84 | asthma | rs2549003 (GWAS)  | P10914                 |
| EV84 | asthma | rs259892          | Q92608                 |
| EV84 | asthma | rs2632057         | Q8IVL1                 |
| EV84 | asthma | rs2668898         | P02794; O76090         |
| EV84 | asthma | rs2705520 (GWAS)  | Q9NT62                 |
| EV84 | asthma | rs2786098 (GWAS)  | P82279                 |
| EV84 | asthma | rs3009511         | Q96A23                 |

|      |        |                   |                |
|------|--------|-------------------|----------------|
| EV84 | asthma | rs3019885 (GWAS)  | Q8IWU4         |
| EV84 | asthma | rs3129890 (GWAS)  | P01903         |
| EV84 | asthma | rs324981          | Q6W5P4         |
| EV84 | asthma | rs345065          | Q9NS91; P56539 |
| EV84 | asthma | rs3730729         | Q9UNA4         |
| EV84 | asthma | rs3755285         | Q9HB29         |
| EV84 | asthma | rs3771166 (GWAS)  | Q13478         |
| EV84 | asthma | rs3771180 (GWAS)  | Q13478; Q01638 |
| EV84 | asthma | rs3787509         | P08579         |
| EV84 | asthma | rs3792785         | Q15025         |
| EV84 | asthma | rs3805236 (GWAS)  | Q13480         |
| EV84 | asthma | rs3894194 (GWAS)  | Q96QA5         |
| EV84 | asthma | rs401302          | P35443         |
| EV84 | asthma | rs404860 (GWAS)   | Q99466         |
| EV84 | asthma | rs4129267 (GWAS)  | P08887         |
| EV84 | asthma | rs41364547        | P11684         |
| EV84 | asthma | rs4673659 (GWAS)  | Q15303         |
| EV84 | asthma | rs4759966         | Q14C87         |
| EV84 | asthma | rs4785358         | Q2M1K9         |
| EV84 | asthma | rs4815617 (GWAS)  | Q7Z434         |
| EV84 | asthma | rs4833095 (GWAS)  | Q15399         |
| EV84 | asthma | rs4845783 (GWAS)  | Q9UGL9; Q5T5A8 |
| EV84 | asthma | rs4950928         | P36222         |
| EV84 | asthma | rs4950929         | P36222         |
| EV84 | asthma | rs495198          | Q8NEY1         |
| EV84 | asthma | rs6094594         | O00167         |
| EV84 | asthma | rs6436310         | P23760         |
| EV84 | asthma | rs6485587         | O94851         |
| EV84 | asthma | rs6571518         | Q13023         |
| EV84 | asthma | rs6678068         | Q9P2M7         |
| EV84 | asthma | rs6691378         | P36222         |
| EV84 | asthma | rs6790467         | Q9NS91; P56539 |
| EV84 | asthma | rs6790962         | Q96A23         |
| EV84 | asthma | rs6822478         | P53779         |
| EV84 | asthma | rs6871536 (GWAS)  | Q92878         |
| EV84 | asthma | rs6904771         | O15217         |
| EV84 | asthma | rs6967330 (GWAS)  | Q6ZTQ4         |
| EV84 | asthma | rs7146136         | Q7L622         |
| EV84 | asthma | rs7166467         | P16452; Q0P6H9 |
| EV84 | asthma | rs7212938 (GWAS)  | Q96QA5         |
| EV84 | asthma | rs7227276         | P25391         |
| EV84 | asthma | rs727777          | Q8TBG9         |
| EV84 | asthma | rs7328278 (GWAS)  | O15075         |
| EV84 | asthma | rs744910 (GWAS)   | P84022         |
| EV84 | asthma | rs7521681 (GWAS)  | Q9UKW4         |
| EV84 | asthma | rs7527074 (GWAS)  | Q9UBH6         |
| EV84 | asthma | rs76043829 (GWAS) | Q9HBL0         |
| EV84 | asthma | rs7775228 (GWAS)  | P01906; P01909 |
| EV84 | asthma | rs7807274 (GWAS)  | Q9UL63         |

|      |                    |                                             |                                                                                                        |
|------|--------------------|---------------------------------------------|--------------------------------------------------------------------------------------------------------|
| EV84 | asthma             | rs7909484                                   | P56975                                                                                                 |
| EV84 | asthma             | rs7922491 (GWAS)                            | Q13976                                                                                                 |
| EV84 | asthma             | rs8014186                                   | Q9BQT8                                                                                                 |
| EV84 | asthma             | rs832147                                    | Q13835                                                                                                 |
| EV84 | asthma             | rs916976                                    | O95714                                                                                                 |
| EV84 | asthma             | rs9272346 (GWAS)                            | P01909; Q9GIY3; Q5Y7A7; Q95IE3; P20039; Q30134; P01912; P01906; Q9TQE0; P13761; Q30167; P13760         |
| EV84 | asthma             | rs9273349 (GWAS)                            | Q9GIY3; Q5Y7A7; Q95IE3; P20039; Q30134; P01912; P01906; P01920; Q9TQE0; P13761; P01909; Q30167; P13760 |
| EV84 | asthma             | rs9273373 (GWAS)                            | Q9GIY3; Q5Y7A7; Q95IE3; P20039; Q30134; P01912; P01906; P01920; Q9TQE0; P13761; P01909; Q30167; P13760 |
| EV84 | asthma             | rs9275698 (GWAS)                            | P01906; P01909                                                                                         |
| EV84 | asthma             | rs928413 (GWAS)                             | O95760                                                                                                 |
| EV84 | asthma             | rs9644708                                   | O95271                                                                                                 |
| EV84 | asthma             | rs9807989 (GWAS)                            | Q13478; Q01638                                                                                         |
| EV84 | asthma             | rs9823506 (GWAS)                            | Q7Z7G0                                                                                                 |
| EV84 | asthma             | rs987870 (GWAS)                             | P04440; P20036                                                                                         |
| EV84 | asthma             | rs9895098 (GWAS)                            | Q684P5                                                                                                 |
| EV84 | dermatitis, atopic | rs10995251 (GWAS)                           | Q70YC5                                                                                                 |
| EV84 | dermatitis, atopic | rs12153855 (GWAS)                           | Q99941; P22105                                                                                         |
| EV84 | dermatitis, atopic | rs1295686 (GWAS)                            | P35225                                                                                                 |
| EV84 | dermatitis, atopic | rs13015714 (GWAS)                           | Q13478; Q01638                                                                                         |
| EV84 | dermatitis, atopic | rs1444418 (GWAS)                            | Q96SZ5                                                                                                 |
| EV84 | dermatitis, atopic | rs1665050 (GWAS)                            | Q6ZNA4                                                                                                 |
| EV84 | dermatitis, atopic | rs176095 (GWAS)                             | P40425; Q9Y4H4; Q99466                                                                                 |
| EV84 | dermatitis, atopic | rs2897442 (GWAS)                            | Q9Y496                                                                                                 |
| EV84 | dermatitis, atopic | rs3091307 (GWAS)                            | P35225                                                                                                 |
| EV84 | dermatitis, atopic | rs3126085 (GWAS)                            | P20930                                                                                                 |
| EV84 | dermatitis, atopic | rs3853601 (GWAS)                            | Q13838                                                                                                 |
| EV84 | dermatitis, atopic | rs4796793 (GWAS)                            | P40763                                                                                                 |
| EV84 | dermatitis, atopic | rs479844 (GWAS)                             | Q2VPB7                                                                                                 |
| EV84 | dermatitis, atopic | rs4821544 (GWAS)                            | Q15080                                                                                                 |
| EV84 | dermatitis, atopic | rs6720763 (GWAS)                            | A4UGR9                                                                                                 |
| EV84 | dermatitis, atopic | rs7613051 (GWAS)                            | P16278                                                                                                 |
| EV84 | rhinitis           | rs10197862 (GWAS)                           | Q13478; Q01638                                                                                         |
| EV84 | rhinitis           | rs12450323 (GWAS)                           | Q9UKT9                                                                                                 |
| EV84 | rhinitis           | rs1438673 (GWAS)                            | Q8NI36                                                                                                 |
| EV84 | rhinitis           | rs17294280 (GWAS)                           | P84022                                                                                                 |
| EV84 | rhinitis           | rs1837253 (GWAS)                            | Q969D9                                                                                                 |
| EV84 | rhinitis           | rs20541                                     | P35225                                                                                                 |
| EV84 | rhinitis           | rs4833095 (GWAS)                            | Q15399                                                                                                 |
| EV84 | rhinitis           | rs7212938 (GWAS)                            | Q96QA5                                                                                                 |
| EV84 | rhinitis           | rs7521681 (GWAS)                            | Q9UKW4                                                                                                 |
| EV84 | rhinitis           | rs76043829 (GWAS)                           | Q9HBL0                                                                                                 |
| EV84 | rhinitis           | rs9273373 (GWAS)                            | Q9GIY3; Q5Y7A7; Q95IE3; P20039; Q30134; P01912; P01906; P01920; Q9TQE0; P13761; P01909; Q30167; P13760 |
| OMIM | asthma             | ASTHMA-RELATED TRAITS, SUSCEPTIBILITY TO, 2 | Q6W5P4                                                                                                 |
| OMIM | asthma             | ASTHMA-RELATED TRAITS,                      | Q9Y616                                                                                                 |

|      |                    |                                                    |                                                                                |
|------|--------------------|----------------------------------------------------|--------------------------------------------------------------------------------|
|      |                    | SUSCEPTIBILITY TO, 5                               |                                                                                |
| OMIM | asthma             | ASTHMA-RELATED TRAITS, SUSCEPTIBILITY TO, 7; ASRT7 | P36222                                                                         |
| OMIM | asthma             | ASTHMA, SUSCEPTIBILITY TO                          | P09917; P07550; Q8TAX7; P17693; P51671; P50135; P35225; Q13093; P01375; Q9UIL8 |
| OMIM | asthma             | IgE RESPONSIVENESS, ATOPIC; IGER                   | Q9NQ38; Q9UIL8; Q9HBE5; Q96D42; P24394; Q13093; P16109                         |
| OMIM | dermatitis, atopic | DERMATITIS, ATOPIC, 2; ATOD2                       | P20930                                                                         |
| OMIM | dermatitis, atopic | WISKOTT-ALDRICH SYNDROME; WAS                      | P42768                                                                         |
| OMIM | rhinitis           | ALLERGIC RHINITIS                                  | P35225                                                                         |
| OMIM | rhinitis           | IgE RESPONSIVENESS, ATOPIC; IGER                   | Q9NQ38; Q9UIL8; Q9HBE5; Q96D42; P24394; Q13093; P16109                         |
