# Supplementary material for: Computational analysis of multimorbidity between asthma, eczema and rhinitis
Source: PLoS One. 2017 Jun 9;12(6):e0179125. doi: 10.1371/journal.pone.0179125 (PMC5466323; doi:10.1371/journal.pone.0179125)
Supplement: S1 File — Tab-delimited text file. Diseases were extracted from the CTD database (see Methods in the main paper). (GZ) [file pone.0179125.s010.gz]

Archive with 1 entries (1 files):
- File_S1.tsv
