# Supplementary material for: Computational analysis of multimorbidity between asthma, eczema and rhinitis
Source: PLoS One. 2017 Jun 9;12(6):e0179125. doi: 10.1371/journal.pone.0179125 (PMC5466323; doi:10.1371/journal.pone.0179125)
Supplement: S1 File — Tab-delimited text file. Diseases were extracted from the CTD database (see Methods in the main paper). (GZ) [file pone.0179125.s010.gz › File_S1.tsv]

dysautonomia, familial	leukocyte-adhesion deficiency syndrome
common variable immunodeficiency	griscelli syndrome type 2
drug eruptions	irak4 deficiency
acquired angioedema	dermatitis, atopic, 1
glomerulopathy with fibronectin deposits	lymphoma, follicular
dermatitis, atopic, 4	lymphoma
ataxia telangiectasia	lymphoproliferative syndrome, ebv-associated, autosomal, 1
food hypersensitivity	hyper-igm immunodeficiency syndrome, type 1
job syndrome	urticaria
arthritis, rheumatoid	hiv-associated lipodystrophy syndrome
hashimoto disease	iga deficiency
complement component 4, partial deficiency of	lupus erythematosus, systemic
eosinophilic esophagitis	wolfram syndrome
asthma-related traits, susceptibility to, 5	granulomatous disease, chronic, autosomal recessive, cytochrome b-negative
lymphoma, large-cell, anaplastic	noonan syndrome-like disorder with loose anagen hair
complement component 7 deficiency	drug eruptions
immune dysfunction with t-cell inactivation due to calcium entry defect 2	leukemia-lymphoma, adult t-cell
burkitt lymphoma	lymphoma, large-cell, anaplastic
immunodysregulation, polyendocrinopathy, and enteropathy, x-linked	lymphoma, follicular
complement component c1r/c1s deficiency	kernicterus
aicardi-goutieres syndrome 5	lymphoma, t-cell, cutaneous
agammaglobulinemia	drug hypersensitivity
lymphoma, t-cell, peripheral	wiskott-aldrich syndrome
asthma-related traits, susceptibility to, 7	complement component 8 deficiency, type ii
encephalomyelitis, autoimmune, experimental	lymphoma, t-cell
granulomatous disease, chronic, x-linked	graves ophthalmopathy
leukocyte adhesion deficiency, type iii	neuropathy, hereditary sensory and autonomic, type ic
hiv seropositivity	interleukin 2 receptor, alpha, deficiency of
diabetes mellitus, type 1	hashimoto disease
chediak-higashi syndrome	lymphoproliferative syndrome, x-linked, 2
immunoblastic lymphadenopathy	job syndrome
neutrophil immunodeficiency syndrome	severe combined immunodeficiency, autosomal recessive, t cell-negative, b cell-negative, nk cell-pos
diabetes mellitus, insulin-dependent, 10	immunodeficiency-centromeric instability-facial anomalies syndrome 1
alpha/beta t-cell lymphopenia with gamma/delta t-cell expansion, severe cytomegalovirus infection, a	lig4 syndrome
arthritis, juvenile	irak4 deficiency
asthma-related traits, susceptibility to, 5	urticaria
lymphoma, t-cell	severe combined immunodeficiency with sensitivity to ionizing radiation
dysautonomia, familial	neuropathy, hereditary sensory and autonomic, type ia
dermatitis, atopic	griscelli syndrome type 2
complement component 6 deficiency	leukocyte adhesion deficiency type 1
asthma-related traits, susceptibility to, 5	graves disease
noonan syndrome-like disorder with or without juvenile myelomonocytic leukemia	wolfram syndrome
bare lymphocyte syndrome 2	job syndrome
myasthenia gravis	severe combined immunodeficiency with microcephaly, growth retardation, and sensitivity to ionizing
arthritis, rheumatoid	ectodermal dysplasia, anhidrotic, with t-cell immunodeficiency, autosomal dominant
complement component 4, partial deficiency of	reticular dysgenesis
agammaglobulinemia 6, autosomal recessive	lymphoma, follicular
irak4 deficiency	severe combined immunodeficiency, autosomal recessive, t cell-negative, b cell-positive, nk cell-neg
hepatic venoocclusive disease with immunodeficiency	immune dysfunction with t-cell inactivation due to calcium entry defect 2
complement component 6 deficiency	hiv infections
drug eruptions	invasive pneumococcal disease, recurrent isolated, 2
hypersensitivity	purpura, thrombotic thrombocytopenic
band-like calcification with simplified gyration and polymicrogyria	hashimoto disease
noonan syndrome-like disorder with or without juvenile myelomonocytic leukemia	pemphigoid, bullous
giant lymph node hyperplasia	granuloma, foreign-body
aids-related opportunistic infections	complement component 7 deficiency
leukemia, hairy cell	masp2 deficiency
dermatitis, atopic, 2	multiple sclerosis, relapsing-remitting
giant lymph node hyperplasia	precursor t-cell lymphoblastic leukemia-lymphoma
purpura, thrombotic thrombocytopenic	severe combined immunodeficiency with microcephaly, growth retardation, and sensitivity to ionizing
precursor t-cell lymphoblastic leukemia-lymphoma	x-linked combined immunodeficiency diseases
arthritis, juvenile	lymphoma, large b-cell, diffuse
asthma, aspirin-induced	leukemia, lymphoid
tyrosine kinase 2 deficiency	wiskott-aldrich syndrome
immune dysfunction with t-cell inactivation due to calcium entry defect 2	neuropathy, hereditary sensory and autonomic, type iia
hereditary angioedema types i and ii	precursor b-cell lymphoblastic leukemia-lymphoma
diabetes mellitus, insulin-dependent, 20	respiratory hypersensitivity
hiv wasting syndrome	muckle-wells syndrome
angioedemas, hereditary	immune dysfunction with t-cell inactivation due to calcium entry defect 2
eosinophilic esophagitis	graft vs host disease
hereditary angioedema types i and ii	severe combined immunodeficiency with sensitivity to ionizing radiation
griscelli syndrome type 2	tyrosine kinase 2 deficiency
diabetes mellitus, type 1	t-lymphocytopenia
complement component 8 deficiency, type ii	lymphoma, t-cell, peripheral
rhinitis, allergic, perennial	thyrotoxic periodic paralysis, susceptibility to, 1
lymphopenia	lymphoproliferative syndrome, x-linked, 2
food hypersensitivity	respiratory hypersensitivity
dermatitis, atopic, 2	severe combined immunodeficiency, autosomal recessive, t cell-negative, b cell-positive, nk cell-neg
aids-related opportunistic infections	diabetes mellitus, insulin-dependent, 2
lupus erythematosus, systemic	myd88 deficiency
complement component 7 deficiency	dermatitis, atopic, 2
asthma	encephalopathy, acute, infection-induced, susceptibility to, 3
ataxia telangiectasia	glomerulonephritis, membranoproliferative
complement component 7 deficiency	hiv wasting syndrome
hyper-igm immunodeficiency syndrome, type 1	pemphigoid, bullous
complement component c1r/c1s deficiency	hyper-ige recurrent infection syndrome, autosomal dominant
hereditary angioedema type iii	severe combined immunodeficiency with microcephaly, growth retardation, and sensitivity to ionizing
hiv-associated lipodystrophy syndrome	leukocyte adhesion deficiency type 1
angioedemas, hereditary	graves ophthalmopathy
asthma	autoimmune polyendocrinopathy syndrome, type 1
anaphylaxis	neutrophil immunodeficiency syndrome
aicardi-goutieres syndrome	hepatic venoocclusive disease with immunodeficiency
ectodermal dysplasia, hypohidrotic, with immune deficiency	purpura, thrombotic thrombocytopenic
multiple sclerosis, relapsing-remitting	severe combined immunodeficiency with sensitivity to ionizing radiation
autoimmune lymphoproliferative syndrome, type iia	hereditary angioedema types i and ii
chediak-higashi syndrome	job syndrome
glomerulopathy with fibronectin deposits	immunologic deficiency syndromes
autoimmune lymphoproliferative syndrome, type iia	immunodeficiency due to defect in mapbp-interacting protein
aicardi-goutieres syndrome	lupus nephritis
bare lymphocyte syndrome, type i	giant lymph node hyperplasia
hiv-associated lipodystrophy syndrome	hyper-ige recurrent infection syndrome, autosomal dominant
alveolitis, extrinsic allergic	precursor cell lymphoblastic leukemia-lymphoma
immunodysregulation, polyendocrinopathy, and enteropathy, x-linked	reticuloendotheliosis, familial, with eosinophilia
complement component 8 deficiency, type ii	invasive pneumococcal disease, recurrent isolated, 2
food hypersensitivity	severe combined immunodeficiency, autosomal recessive, t cell-negative, b cell-positive, nk cell-pos
encephalomyelitis, autoimmune, experimental	glomerulonephritis, membranous
dermatitis, atopic, 1	hyper-ige recurrent infection syndrome, autosomal dominant
addison disease	hyper-igm immunodeficiency syndrome, type 1
band-like calcification with simplified gyration and polymicrogyria	diabetes mellitus, insulin-dependent, 19
aids-related kaposi sarcoma	eosinophilic esophagitis
lymphoma, t-cell, cutaneous	thyrotoxic periodic paralysis, susceptibility to, 1
multiple sclerosis, relapsing-remitting	stevens-johnson syndrome
glomerulonephritis, iga	hiv infections
autoimmune polyendocrinopathy syndrome, type 1	hypersensitivity
sjogren's syndrome	wiskott-aldrich syndrome
leukemia-lymphoma, adult t-cell	pemphigoid, bullous
drug eruptions	hypogammaglobulinemia and isolated growth hormone deficiency, x-linked
hepatitis, autoimmune	severe combined immunodeficiency, autosomal recessive, t cell-negative, b cell-negative, nk cell-pos
granuloma, respiratory tract	hyper-ige recurrent infection syndrome, autosomal dominant
diabetes mellitus, insulin-dependent, 5	precursor t-cell lymphoblastic leukemia-lymphoma
neuropathy, hereditary sensory and autonomic, type ic	riddle syndrome
multiple myeloma	osteopetrosis, autosomal recessive 7
burkitt lymphoma	muckle-wells syndrome
dermatitis, atopic, 1	granulomatous disease, chronic, x-linked
common variable immunodeficiency	lymphangioleiomyomatosis
complement component 6 deficiency	hypersensitivity, immediate
aids-related kaposi sarcoma	job syndrome
schimke immunoosseous dysplasia	uveomeningoencephalitic syndrome
masp2 deficiency	multiple myeloma
hereditary sensory and autonomic neuropathies	masp2 deficiency
glomerulopathy with fibronectin deposits	hereditary angioedema types i and ii
drug hypersensitivity	neuropathy, hereditary sensory and autonomic, type ia
ataxia telangiectasia	hypersensitivity, delayed
common variable immunodeficiency	lymphoma, b-cell
food hypersensitivity	purpura, thrombotic thrombocytopenic
asthma, aspirin-induced	lig4 syndrome
aids-related opportunistic infections	sjogren's syndrome
alpha/beta t-cell lymphopenia with gamma/delta t-cell expansion, severe cytomegalovirus infection, a	graft vs host disease
bare lymphocyte syndrome 2	diabetes mellitus, insulin-dependent, 5
diffuse cerebral sclerosis of schilder	rheumatoid arthritis, systemic juvenile
lig4 syndrome	tyrosine kinase 2 deficiency
diabetes mellitus, insulin-dependent, 10	lymphoma, t-cell
hiv wasting syndrome	severe combined immunodeficiency with microcephaly, growth retardation, and sensitivity to ionizing
aicardi-goutieres syndrome	immunoglobulin a deficiency 2
muckle-wells syndrome	thyrotoxic periodic paralysis, susceptibility to, 1
leukemia, lymphocytic, chronic, b-cell	lymphoma, mantle-cell
graves disease	lymphopenia
bruton type agammaglobulinemia	dermatitis, allergic contact
ectodermal dysplasia, hypohidrotic, with immune deficiency	lymphoma, large-cell, anaplastic
leukocyte adhesion deficiency, type iii	t-lymphocytopenia
complement component 7 deficiency	hiv-associated lipodystrophy syndrome
autoimmune lymphoproliferative syndrome, type iia	severe combined immunodeficiency with sensitivity to ionizing radiation
neutrophil immunodeficiency syndrome	spondyloenchondrodysplasia
aids-related opportunistic infections	rheumatoid arthritis, systemic juvenile
neuromyelitis optica	reticular dysgenesis
granuloma, respiratory tract	hiv-associated lipodystrophy syndrome
autoimmune lymphoproliferative syndrome	leukocyte adhesion deficiency type 1
immunodeficiency-centromeric instability-facial anomalies syndrome 1	lymphoma, t-cell
hypersensitivity, delayed	precursor b-cell lymphoblastic leukemia-lymphoma
dermatitis, atopic, 1	severe combined immunodeficiency with sensitivity to ionizing radiation
familial cold autoinflammatory syndrome 1	masp2 deficiency
agammaglobulinemia	thyrotoxic periodic paralysis, susceptibility to, 1
granulomatous disease, chronic	myd88 deficiency
burkitt lymphoma	granulomatous disease, chronic, autosomal recessive, cytochrome b-negative
hiv wasting syndrome	severe combined immunodeficiency with sensitivity to ionizing radiation
diabetes mellitus, insulin-dependent, 5	graves disease
aicardi-goutieres syndrome 5	wiskott-aldrich syndrome
angioedema	tn syndrome
encephalopathy, acute, infection-induced, susceptibility to, 3	lymphoma, large b-cell, diffuse
complement component 6 deficiency	rheumatoid arthritis, systemic juvenile
drug eruptions	tn syndrome
asthma-related traits, susceptibility to, 7	graves ophthalmopathy
glomerulonephritis, iga	severe combined immunodeficiency, autosomal recessive, t cell-negative, b cell-positive, nk cell-neg
osteopetrosis, autosomal recessive 7	schimke immunoosseous dysplasia
glomerulonephritis, membranous	myasthenia gravis
alpha/beta t-cell lymphopenia with gamma/delta t-cell expansion, severe cytomegalovirus infection, a	t cell immunodeficiency primary
angioedema	hypogammaglobulinemia and isolated growth hormone deficiency, x-linked
arthritis, rheumatoid	dermatitis, atopic, 2
bruton type agammaglobulinemia	sarcoidosis, early-onset
multiple sclerosis	tyrosine kinase 2 deficiency
complement component 7 deficiency	wolcott-rallison syndrome
chediak-higashi syndrome	wolfram syndrome
diabetes mellitus, type 1	hypersensitivity, delayed
dermatitis, atopic	invasive pneumococcal disease, recurrent isolated, 2
asthma-related traits, susceptibility to, 5	complement component 2 deficiency
granuloma, foreign-body	lymphoma, t-cell
chediak-higashi syndrome	pemphigus
hiv wasting syndrome	severe combined immunodeficiency due to adenosine deaminase deficiency
food hypersensitivity	leukemia, hairy cell
diabetes mellitus, insulin-dependent, 5	hiv wasting syndrome
ectodermal dysplasia, anhidrotic, with immunodeficiency, osteopetrosis, and lymphedema	rheumatoid arthritis, systemic juvenile
lupus erythematosus, systemic	respiratory hypersensitivity
asthma, aspirin-induced	leukocyte-adhesion deficiency syndrome
hepatitis, autoimmune	lymphoma, t-cell
lymphoma, t-cell	purpura, schoenlein-henoch
hereditary angioedema types i and ii	interleukin 2 receptor, alpha, deficiency of
ige responsiveness, atopic	purpura, thrombocytopenic, idiopathic
diabetes mellitus, insulin-dependent, 2	graves disease
encephalomyelitis, autoimmune, experimental	neuropathy, hereditary sensory and autonomic, type ic
invasive pneumococcal disease, recurrent isolated, 2	pemphigus
myd88 deficiency	severe combined immunodeficiency
agammaglobulinemia 4, autosomal recessive	immunodeficiency due to defect in mapbp-interacting protein
mevalonate kinase deficiency	severe combined immunodeficiency, autosomal recessive, t cell-negative, b cell-negative, nk cell-pos
severe combined immunodeficiency	wolfram syndrome
hyper-ige recurrent infection syndrome, autosomal dominant	lymphoma, mantle-cell
asthma, aspirin-induced	x-linked combined immunodeficiency diseases
alveolitis, extrinsic allergic	severe combined immunodeficiency, autosomal recessive, t cell-negative, b cell-positive, nk cell-neg
polyendocrinopathies, autoimmune	serum sickness
severe combined immunodeficiency, autosomal recessive, t cell-negative, b cell-positive, nk cell-pos	stevens-johnson syndrome
agammaglobulinemia 4, autosomal recessive	hiv infections
irak4 deficiency	lymphoma, t-cell, peripheral
immunodysregulation, polyendocrinopathy, and enteropathy, x-linked	uveomeningoencephalitic syndrome
complement component 5 deficiency	leukocyte-adhesion deficiency syndrome
lig4 syndrome	lupus erythematosus, systemic
immunoblastic lymphadenopathy	serum sickness
interleukin 2 receptor, alpha, deficiency of	wolcott-rallison syndrome
asthma	lymphoma, extranodal nk-t-cell
hodgkin disease	hyper-igm immunodeficiency syndrome
complement component 8 deficiency, type ii	pemphigus
asthma, aspirin-induced	dermatitis, allergic contact
drug hypersensitivity	granuloma, respiratory tract
autoimmune lymphoproliferative syndrome	hepatic venoocclusive disease with immunodeficiency
hyper-igm immunodeficiency syndrome, type 1	purpura, schoenlein-henoch
chediak-higashi syndrome	stevens-johnson syndrome
food hypersensitivity	lymphoma, follicular
autoimmune lymphoproliferative syndrome	dermatitis, atopic
acquired immunodeficiency syndrome	severe combined immunodeficiency due to adenosine deaminase deficiency
early-onset ataxia with oculomotor apraxia and hypoalbuminemia	glomerulonephritis, iga
rhinitis, allergic, perennial	tn syndrome
granuloma, foreign-body	lymphoma, b-cell
diabetes mellitus, insulin-dependent, 2	sarcoidosis, early-onset
aids-related opportunistic infections	hereditary sensory and autonomic neuropathies
arthritis, juvenile	granuloma, respiratory tract
complement component 8 deficiency, type i	wolcott-rallison syndrome
dermatitis, allergic contact	wolcott-rallison syndrome
complement component c1r/c1s deficiency	lymphoma, t-cell
granuloma, respiratory tract	pemphigoid, bullous
diabetes mellitus, insulin-dependent, 10	glomerulonephritis, membranous
precursor cell lymphoblastic leukemia-lymphoma	severe combined immunodeficiency with microcephaly, growth retardation, and sensitivity to ionizing
alpha/beta t-cell lymphopenia with gamma/delta t-cell expansion, severe cytomegalovirus infection, a	hiv seropositivity
autoimmune disease, susceptibility to, 1	multiple chemical sensitivity
giant lymph node hyperplasia	whim syndrome
lig4 syndrome	noonan syndrome-like disorder with loose anagen hair
diabetes mellitus, insulin-dependent, 20	neuropathy, hereditary sensory and autonomic, type ia
immunodeficiency due to defect in cd3-zeta	lymphoma, extranodal nk-t-cell
granuloma, foreign-body	immunodeficiency without anhidrotic ectodermal dysplasia
complement component 2 deficiency	complement component 6 deficiency
immunoglobulin a deficiency 2	neuropathy, hereditary sensory and autonomic, type ia
bare lymphocyte syndrome 2	eosinophilic esophagitis
agammaglobulinemia	diffuse cerebral sclerosis of schilder
severe combined immunodeficiency due to adenosine deaminase deficiency	x-linked combined immunodeficiency diseases
giant lymph node hyperplasia	hypersensitivity, delayed
agammaglobulinemia	graves disease
encephalopathy, acute, infection-induced, susceptibility to, 3	pemphigus
diabetes mellitus, insulin-dependent, 22	immune dysfunction with t-cell inactivation due to calcium entry defect 1
dermatitis, atopic	hyper-igm immunodeficiency syndrome, type 1
diabetes mellitus, insulin-dependent, 20	sjogren's syndrome
hyper-ige recurrent infection syndrome, autosomal dominant	neuromyelitis optica
hypersensitivity, delayed	purpura, thrombocytopenic, idiopathic
immunodysregulation, polyendocrinopathy, and enteropathy, x-linked	reticular dysgenesis
precursor cell lymphoblastic leukemia-lymphoma	reticular dysgenesis
asthma-related traits, susceptibility to, 7	job syndrome
granulomatous disease, chronic, autosomal recessive, cytochrome b-positive, type ii	rheumatoid arthritis, systemic juvenile
hyper-igm immunodeficiency syndrome, type 1	iga deficiency
lymphoma, non-hodgkin	purpura, thrombotic thrombocytopenic
complement component 7 deficiency	hepatic venoocclusive disease with immunodeficiency
reticular dysgenesis	urticaria
agammaglobulinemia 6, autosomal recessive	neuropathy, hereditary sensory and autonomic, type ia
angioedemas, hereditary	leukocyte-adhesion deficiency syndrome
giant lymph node hyperplasia	hepatitis, autoimmune
diabetes mellitus, insulin-dependent, 12	lupus erythematosus, systemic
acquired angioedema	granuloma, foreign-body
arthritis, juvenile	ectodermal dysplasia, anhidrotic, with t-cell immunodeficiency, autosomal dominant
food hypersensitivity	griscelli syndrome type 2
lymphoproliferative syndrome, ebv-associated, autosomal, 1	multiple sclerosis
diabetes mellitus, insulin-dependent, 20	wolfram syndrome
immunodeficiency due to defect in mapbp-interacting protein	stevens-johnson syndrome
immunodeficiency due to defect in cd3-zeta	lymphoproliferative syndrome, x-linked, 2
complement component 8 deficiency, type i	granuloma, foreign-body
agammaglobulinemia 6, autosomal recessive	alveolitis, extrinsic allergic
hyper-ige recurrent infection syndrome, autosomal dominant	tn syndrome
graves ophthalmopathy	myasthenia gravis
diabetes mellitus, insulin-dependent, 2	multiple sclerosis
asthma, aspirin-induced	hereditary angioedema type iii
complement component 4, partial deficiency of	leukocyte-adhesion deficiency syndrome
diabetes mellitus, insulin-dependent, 5	wiskott-aldrich syndrome
hiv wasting syndrome	stevens-johnson syndrome
granuloma, plasma cell	graves ophthalmopathy
aicardi-goutieres syndrome	lymphoma
alpha/beta t-cell lymphopenia with gamma/delta t-cell expansion, severe cytomegalovirus infection, a	hereditary angioedema types i and ii
diffuse cerebral sclerosis of schilder	hiv seropositivity
immunodeficiency due to defect in cd3-zeta	multiple chemical sensitivity
graft vs host disease	hereditary angioedema type iii
immunodeficiency-centromeric instability-facial anomalies syndrome 1	mevalonate kinase deficiency
complement component 6 deficiency	lymphoma, b-cell
agammaglobulinemia 6, autosomal recessive	granulomatous disease, chronic
acquired immunodeficiency syndrome	noonan syndrome-like disorder with or without juvenile myelomonocytic leukemia
acquired immunodeficiency syndrome	neutrophil immunodeficiency syndrome
lymphopenia	uveomeningoencephalitic syndrome
hyper-ige recurrent infection syndrome, autosomal dominant	lymphangioleiomyomatosis
immunodeficiency without anhidrotic ectodermal dysplasia	sarcoidosis
anaphylaxis	t-lymphocytopenia
lupus nephritis	severe combined immunodeficiency, autosomal recessive, t cell-negative, b cell-positive, nk cell-pos
complement component 6 deficiency	severe combined immunodeficiency
ectodermal dysplasia, hypohidrotic, with immune deficiency	myd88 deficiency
encephalopathy, acute, infection-induced, susceptibility to, 3	granuloma, foreign-body
complement component 7 deficiency	immunodeficiency without anhidrotic ectodermal dysplasia
aids-related opportunistic infections	hiv wasting syndrome
lig4 syndrome	multiple myeloma
invasive pneumococcal disease, recurrent isolated, 2	kernicterus
hashimoto disease	precursor cell lymphoblastic leukemia-lymphoma
hereditary sensory and autonomic neuropathies	severe combined immunodeficiency with sensitivity to ionizing radiation
griscelli syndrome type 2	lymphoma, t-cell, peripheral
complement component 4, partial deficiency of	leukemia-lymphoma, adult t-cell
lymphoma, mantle-cell	pemphigus
complement component c1r/c1s deficiency	precursor cell lymphoblastic leukemia-lymphoma
hypersensitivity, immediate	purpura, thrombocytopenic, idiopathic
lymphoma, t-cell, peripheral	urticaria
acquired angioedema	anaphylaxis
autoimmune polyendocrinopathy syndrome, type 1	immune complex diseases
asthma	lymphoma, large b-cell, diffuse
bare lymphocyte syndrome 2	granulomatous disease, chronic
hypersensitivity, immediate	stevens-johnson syndrome
diabetes mellitus, insulin-dependent, 10	urticaria
hepatic venoocclusive disease with immunodeficiency	noonan syndrome-like disorder with or without juvenile myelomonocytic leukemia
autoimmune diseases	dermatitis, atopic, 2
mevalonate kinase deficiency	osteopetrosis, autosomal recessive 7
immunodeficiency without anhidrotic ectodermal dysplasia	leukemia, lymphocytic, chronic, b-cell
lymphoma, t-cell, cutaneous	neuropathy, hereditary sensory and autonomic, type ic
reticuloendotheliosis, familial, with eosinophilia	wolcott-rallison syndrome
tn syndrome	uveomeningoencephalitic syndrome
leukemia-lymphoma, adult t-cell	respiratory hypersensitivity
immunodeficiency without anhidrotic ectodermal dysplasia	immunoglobulin a deficiency 2
early-onset ataxia with oculomotor apraxia and hypoalbuminemia	purpura, thrombotic thrombocytopenic
lymphoma, b-cell	lymphoma, t-cell, peripheral
immune dysfunction with t-cell inactivation due to calcium entry defect 2	x-linked combined immunodeficiency diseases
autoimmune diseases	hiv-associated lipodystrophy syndrome
leukemia, hairy cell	severe combined immunodeficiency, autosomal recessive, t cell-negative, b cell-positive, nk cell-neg
mevalonate kinase deficiency	thyroiditis, autoimmune
leukemia, hairy cell	thyroiditis, autoimmune
invasive pneumococcal disease, recurrent isolated, 1	lymphoproliferative syndrome, ebv-associated, autosomal, 1
lupus erythematosus, systemic	whim syndrome
ectodermal dysplasia, anhidrotic, with immunodeficiency, osteopetrosis, and lymphedema	immune dysfunction with t-cell inactivation due to calcium entry defect 2
band-like calcification with simplified gyration and polymicrogyria	lymphopenia
granuloma, foreign-body	leukemia, lymphocytic, chronic, b-cell
hereditary angioedema types i and ii	hereditary sensory and autonomic neuropathies
acquired angioedema	precursor b-cell lymphoblastic leukemia-lymphoma
lymphoma, non-hodgkin	peanut hypersensitivity
hashimoto disease	lymphoma, large b-cell, diffuse
drug eruptions	pemphigoid, bullous
aids-related kaposi sarcoma	autoimmune lymphoproliferative syndrome
complement component c1r/c1s deficiency	leukocyte adhesion deficiency type 1
diabetes mellitus, insulin-dependent, 22	graft vs host disease
immunoblastic lymphadenopathy	interleukin 2 receptor, alpha, deficiency of
masp2 deficiency	thyroiditis, autoimmune
masp2 deficiency	pemphigus
glomerulonephritis, membranous	rhinitis, allergic, perennial
invasive pneumococcal disease, recurrent isolated, 1	lymphoma, large b-cell, diffuse
severe combined immunodeficiency, autosomal recessive, t cell-negative, b cell-positive, nk cell-pos	sjogren's syndrome
muckle-wells syndrome	severe combined immunodeficiency, autosomal recessive, t cell-negative, b cell-negative, nk cell-pos
lymphangioleiomyomatosis	lymphoma, t-cell, cutaneous
granulomatous disease, chronic, autosomal recessive, cytochrome b-positive, type i	hypersensitivity, immediate
aids-related kaposi sarcoma	band-like calcification with simplified gyration and polymicrogyria
agammaglobulinemia	diabetes mellitus, insulin-dependent, 5
immunodeficiency without anhidrotic ectodermal dysplasia	wolcott-rallison syndrome
granulomatous disease, chronic, autosomal recessive, cytochrome b-negative	granulomatous disease, chronic, autosomal recessive, cytochrome b-positive, type i
autoimmune lymphoproliferative syndrome, type iia	diabetes mellitus, insulin-dependent, 5
arthritis, rheumatoid	diabetes mellitus, insulin-dependent, 22
angioedemas, hereditary	lymphangioleiomyomatosis
hiv-associated lipodystrophy syndrome	leukemia-lymphoma, adult t-cell
burkitt lymphoma	diffuse cerebral sclerosis of schilder
complement component 6 deficiency	wiskott-aldrich syndrome
dermatitis, allergic contact	invasive pneumococcal disease, recurrent isolated, 2
dysautonomia, familial	kernicterus
hyper-igm immunodeficiency syndrome, type 1	muckle-wells syndrome
autoimmune disease, susceptibility to, 1	lymphoma, b-cell
severe combined immunodeficiency due to adenosine deaminase deficiency	tyrosine kinase 2 deficiency
hiv wasting syndrome	iga deficiency
combined cellular and humoral immune defects with granulomas	lig4 syndrome
diabetes mellitus, insulin-dependent, 2	immunodeficiency-centromeric instability-facial anomalies syndrome 1
bruton type agammaglobulinemia	lymphoma
leukemia, t-cell	leukocyte-adhesion deficiency syndrome
job syndrome	leukemia, lymphoid
aids-related kaposi sarcoma	autoimmune disease, susceptibility to, 1
cd8 deficiency, familial	kernicterus
granuloma, respiratory tract	rheumatoid arthritis, systemic juvenile
hypersensitivity, delayed	lymphoma, t-cell, cutaneous
hyper-igm immunodeficiency syndrome, type 1	lymphoma, non-hodgkin
encephalopathy, acute, infection-induced, susceptibility to, 3	immune dysfunction with t-cell inactivation due to calcium entry defect 2
lymphoproliferative syndrome, ebv-associated, autosomal, 1	masp2 deficiency
aids-related kaposi sarcoma	precursor t-cell lymphoblastic leukemia-lymphoma
anaphylaxis	thyrotoxic periodic paralysis, susceptibility to, 1
dermatitis, atopic	lymphangioleiomyomatosis
respiratory hypersensitivity	severe combined immunodeficiency, autosomal recessive, t cell-negative, b cell-negative, nk cell-pos
graves ophthalmopathy	peanut hypersensitivity
band-like calcification with simplified gyration and polymicrogyria	neuromyelitis optica
bruton type agammaglobulinemia	glomerulonephritis, membranoproliferative
aids-related kaposi sarcoma	complement component 2 deficiency
glomerulonephritis, membranoproliferative	immunodeficiency due to defect in cd3-zeta
drug hypersensitivity	hypersensitivity, delayed
masp2 deficiency	noonan syndrome-like disorder with or without juvenile myelomonocytic leukemia
leukemia, lymphocytic, chronic, b-cell	schimke immunoosseous dysplasia
early-onset ataxia with oculomotor apraxia and hypoalbuminemia	lymphoma, b-cell
asthma-related traits, susceptibility to, 5	hiv infections
eosinophilic esophagitis	tyrosine kinase 2 deficiency
complement component 6 deficiency	urticaria
cd8 deficiency, familial	ectodermal dysplasia, anhidrotic, with t-cell immunodeficiency, autosomal dominant
addison disease	masp2 deficiency
hashimoto disease	pemphigus
acquired immunodeficiency syndrome	stevens-johnson syndrome
diabetes mellitus, insulin-dependent, 22	immunodeficiency-centromeric instability-facial anomalies syndrome 1
hodgkin disease	schimke immunoosseous dysplasia
lymphoma	riddle syndrome
hiv-associated lipodystrophy syndrome	immune complex diseases
complement component 6 deficiency	immunodeficiency due to defect in cd3-zeta
complement component 5 deficiency	osteopetrosis, autosomal recessive 7
complement component 8 deficiency, type ii	myasthenia gravis
glomerulonephritis, membranous	hypersensitivity
aicardi-goutieres syndrome	purpura, thrombocytopenic, idiopathic
graft vs host disease	noonan syndrome-like disorder with loose anagen hair
angioedemas, hereditary	severe combined immunodeficiency with sensitivity to ionizing radiation
aids-related opportunistic infections	eosinophilic esophagitis
hereditary angioedema types i and ii	leukocyte-adhesion deficiency syndrome
lymphoma, extranodal nk-t-cell	pemphigus
diabetes mellitus, insulin-dependent, 10	masp2 deficiency
asthma, aspirin-induced	t cell immunodeficiency primary
asthma-related traits, susceptibility to, 7	osteopetrosis, autosomal recessive 7
anaphylaxis	dermatitis, allergic contact
common variable immunodeficiency	hiv seropositivity
cd8 deficiency, familial	dermatitis, atopic, 1
muckle-wells syndrome	schimke immunoosseous dysplasia
kernicterus	masp2 deficiency
dysautonomia, familial	glomerulonephritis, iga
early-onset ataxia with oculomotor apraxia and hypoalbuminemia	thyroiditis, autoimmune
immunodeficiency-centromeric instability-facial anomalies syndrome 1	precursor cell lymphoblastic leukemia-lymphoma
serum sickness	spondyloenchondrodysplasia
complement component 8 deficiency, type i	neuropathy, hereditary sensory and autonomic, type ic
leukemia-lymphoma, adult t-cell	stevens-johnson syndrome
encephalopathy, acute, infection-induced, susceptibility to, 3	muckle-wells syndrome
eosinophilic esophagitis	neutrophil immunodeficiency syndrome
complement component 5 deficiency	complement component 8 deficiency, type i
immunodeficiency without anhidrotic ectodermal dysplasia	lymphoma
band-like calcification with simplified gyration and polymicrogyria	multiple myeloma
ige responsiveness, atopic	serum sickness
complement component 8 deficiency, type ii	dermatitis, atopic, 4
ige responsiveness, atopic	stevens-johnson syndrome
complement component 5 deficiency	lymphoma, t-cell, cutaneous
graft vs host disease	lymphopenia
mevalonate kinase deficiency	severe combined immunodeficiency due to adenosine deaminase deficiency
burkitt lymphoma	spondyloenchondrodysplasia
multiple chemical sensitivity	peanut hypersensitivity
lymphoma, non-hodgkin	precursor cell lymphoblastic leukemia-lymphoma
complement component 6 deficiency	sarcoidosis
hyper-igm immunodeficiency syndrome	myasthenia gravis
diabetes mellitus, insulin-dependent, 20	severe combined immunodeficiency with sensitivity to ionizing radiation
lymphoma, large b-cell, diffuse	precursor t-cell lymphoblastic leukemia-lymphoma
diabetes mellitus, insulin-dependent, 5	immunoblastic lymphadenopathy
dermatitis, atopic	neuropathy, hereditary sensory and autonomic, type ia
hepatic venoocclusive disease with immunodeficiency	hyper-igm immunodeficiency syndrome, type 1
complement component 7 deficiency	lymphoma, non-hodgkin
chediak-higashi syndrome	neuropathy, hereditary sensory and autonomic, type iia
multiple chemical sensitivity	tn syndrome
precursor cell lymphoblastic leukemia-lymphoma	severe combined immunodeficiency, autosomal recessive, t cell-negative, b cell-positive, nk cell-neg
pemphigoid, bullous	precursor t-cell lymphoblastic leukemia-lymphoma
hyper-igm immunodeficiency syndrome	osteopetrosis, autosomal recessive 7
lupus erythematosus, systemic	x-linked combined immunodeficiency diseases
immunodeficiency due to defect in mapbp-interacting protein	severe combined immunodeficiency
lymphoma, t-cell	noonan syndrome-like disorder with or without juvenile myelomonocytic leukemia
hyper-ige recurrent infection syndrome, autosomal dominant	hyper-igm immunodeficiency syndrome, type 1
cd8 deficiency, familial	leukocyte-adhesion deficiency syndrome
angioedemas, hereditary	schimke immunoosseous dysplasia
eosinophilic esophagitis	immunodeficiency due to defect in mapbp-interacting protein
lupus erythematosus, systemic	schimke immunoosseous dysplasia
masp2 deficiency	precursor t-cell lymphoblastic leukemia-lymphoma
angioedema	muckle-wells syndrome
asthma	multiple sclerosis
diabetes mellitus, type 1	glomerulonephritis, membranoproliferative
dermatitis, atopic, 2	thyrotoxic periodic paralysis, susceptibility to, 1
graft vs host disease	hereditary angioedema types i and ii
granulomatous disease, chronic, x-linked	multiple myeloma
hiv seropositivity	lymphoma, b-cell
immunodeficiency due to defect in mapbp-interacting protein	lymphopenia
aicardi-goutieres syndrome	riddle syndrome
bare lymphocyte syndrome 2	irak4 deficiency
diffuse cerebral sclerosis of schilder	tn syndrome
hypersensitivity, immediate	wolcott-rallison syndrome
noonan syndrome-like disorder with or without juvenile myelomonocytic leukemia	rhinitis, allergic, perennial
diabetes mellitus, insulin-dependent, 2	x-linked combined immunodeficiency diseases
diabetes mellitus, insulin-dependent, 20	purpura, thrombotic thrombocytopenic
complement component 8 deficiency, type ii	hereditary sensory and autonomic neuropathies
kernicterus	lymphoma
diabetes mellitus, type 1	hypersensitivity
diabetes mellitus, insulin-dependent, 10	pemphigus
complement component 7 deficiency	hodgkin disease
encephalomyelitis, autoimmune, experimental	severe combined immunodeficiency, autosomal recessive, t cell-negative, b cell-negative, nk cell-pos
familial cold autoinflammatory syndrome 1	neuropathy, hereditary sensory and autonomic, type ia
asthma-related traits, susceptibility to, 7	dermatitis, atopic, 4
granulomatous disease, chronic, autosomal recessive, cytochrome b-positive, type i	interleukin 2 receptor, alpha, deficiency of
asthma-related traits, susceptibility to, 7	giant lymph node hyperplasia
angioedemas, hereditary	wolfram syndrome
encephalomyelitis, autoimmune, experimental	thyroiditis, autoimmune
leukemia, lymphoid	sjogren's syndrome
hereditary angioedema type iii	hiv-associated lipodystrophy syndrome
severe combined immunodeficiency, autosomal recessive, t cell-negative, b cell-positive, nk cell-pos	tyrosine kinase 2 deficiency
glomerulopathy with fibronectin deposits	mevalonate kinase deficiency
complement component c1r/c1s deficiency	graves disease
diabetes mellitus, insulin-dependent, 20	sarcoidosis
dermatitis, atopic	lymphoproliferative syndrome, x-linked, 2
interleukin 2 receptor, alpha, deficiency of	lymphoma, non-hodgkin
asthma, aspirin-induced	ectodermal dysplasia, hypohidrotic, with immune deficiency
diabetes mellitus, insulin-dependent, 20	hashimoto disease
band-like calcification with simplified gyration and polymicrogyria	complement component 8 deficiency, type i
drug hypersensitivity	pemphigoid, bullous
hyper-igm immunodeficiency syndrome	lymphoma, large b-cell, diffuse
graft vs host disease	hiv infections
severe combined immunodeficiency, autosomal recessive, t cell-negative, b cell-negative, nk cell-pos	wolcott-rallison syndrome
glomerulonephritis, iga	immunodysregulation, polyendocrinopathy, and enteropathy, x-linked
hashimoto disease	sarcoidosis, early-onset
ataxia telangiectasia	job syndrome
hodgkin disease	purpura, schoenlein-henoch
graves disease	ige responsiveness, atopic
asthma	multiple chemical sensitivity
diabetes mellitus, insulin-dependent, 12	sjogren's syndrome
anaphylaxis	autoimmune lymphoproliferative syndrome
immunoblastic lymphadenopathy	thyrotoxic periodic paralysis, susceptibility to, 1
diffuse cerebral sclerosis of schilder	leukemia-lymphoma, adult t-cell
immunodeficiency due to defect in cd3-zeta	rhinitis, allergic, perennial
hyper-igm immunodeficiency syndrome, type 1	lymphoma, t-cell
hodgkin disease	myasthenia gravis
hepatic venoocclusive disease with immunodeficiency	purpura, thrombocytopenic, idiopathic
irak4 deficiency	urticaria
diabetes mellitus, insulin-dependent, 10	hyper-igm immunodeficiency syndrome, type 1
glomerulonephritis, membranous	severe combined immunodeficiency, autosomal recessive, t cell-negative, b cell-negative, nk cell-pos
hyper-ige recurrent infection syndrome, autosomal dominant	t-lymphocytopenia
severe combined immunodeficiency with microcephaly, growth retardation, and sensitivity to ionizing	tn syndrome
leukocyte-adhesion deficiency syndrome	severe combined immunodeficiency with microcephaly, growth retardation, and sensitivity to ionizing
glomerulonephritis, membranous	leukocyte adhesion deficiency type 1
granulomatous disease, chronic, x-linked	muckle-wells syndrome
immunoglobulin a deficiency 2	x-linked combined immunodeficiency diseases
agammaglobulinemia 6, autosomal recessive	peanut hypersensitivity
chediak-higashi syndrome	hyper-igm immunodeficiency syndrome, type 1
bare lymphocyte syndrome 2	burkitt lymphoma
arthritis, rheumatoid	griscelli syndrome type 2
diabetes mellitus, type 1	dysautonomia, familial
lymphoma, b-cell	rheumatoid arthritis, systemic juvenile
dermatitis, allergic contact	myd88 deficiency
stevens-johnson syndrome	thyroiditis, autoimmune
graves disease	immunodysregulation, polyendocrinopathy, and enteropathy, x-linked
angioedema	hypersensitivity, delayed
aids-related opportunistic infections	hypersensitivity
alpha/beta t-cell lymphopenia with gamma/delta t-cell expansion, severe cytomegalovirus infection, a	diffuse cerebral sclerosis of schilder
complement component 7 deficiency	precursor b-cell lymphoblastic leukemia-lymphoma
multiple sclerosis	t cell immunodeficiency primary
granulomatous disease, chronic, autosomal recessive, cytochrome b-positive, type ii	lymphoma, non-hodgkin
diabetes mellitus, type 1	drug eruptions
lymphoma, extranodal nk-t-cell	severe combined immunodeficiency, autosomal recessive, t cell-negative, b cell-positive, nk cell-pos
hereditary angioedema type iii	neutrophil immunodeficiency syndrome
asthma-related traits, susceptibility to, 5	multiple sclerosis, relapsing-remitting
agammaglobulinemia	aids-related kaposi sarcoma
hiv infections	severe combined immunodeficiency with sensitivity to ionizing radiation
aids-related kaposi sarcoma	immune complex diseases
immune complex diseases	urticaria
food hypersensitivity	leukocyte adhesion deficiency, type iii
purpura, thrombotic thrombocytopenic	serum sickness
complement component c1r/c1s deficiency	lymphoma, non-hodgkin
kernicterus	lig4 syndrome
granulomatous disease, chronic, autosomal recessive, cytochrome b-positive, type ii	ige responsiveness, atopic
agammaglobulinemia 6, autosomal recessive	immunodeficiency without anhidrotic ectodermal dysplasia
encephalopathy, acute, infection-induced, susceptibility to, 3	x-linked combined immunodeficiency diseases
iga deficiency	ige responsiveness, atopic
common variable immunodeficiency	lupus erythematosus, systemic
lymphoma, t-cell	mevalonate kinase deficiency
alpha/beta t-cell lymphopenia with gamma/delta t-cell expansion, severe cytomegalovirus infection, a	drug hypersensitivity
lymphoproliferative syndrome, ebv-associated, autosomal, 1	thyroiditis, autoimmune
angioedemas, hereditary	noonan syndrome-like disorder with or without juvenile myelomonocytic leukemia
early-onset ataxia with oculomotor apraxia and hypoalbuminemia	severe combined immunodeficiency
diffuse cerebral sclerosis of schilder	ige responsiveness, atopic
immune complex diseases	lymphoma, t-cell
asthma-related traits, susceptibility to, 5	immune complex diseases
hypogammaglobulinemia and isolated growth hormone deficiency, x-linked	uveomeningoencephalitic syndrome
autoimmune lymphoproliferative syndrome, type iia	lymphoma, t-cell, cutaneous
autoimmune diseases	stevens-johnson syndrome
autoimmune lymphoproliferative syndrome	dysautonomia, familial
granulomatous disease, chronic	hiv seropositivity
lupus nephritis	lymphoma
granulomatous disease, chronic	lymphoma, non-hodgkin
agammaglobulinemia 4, autosomal recessive	arthritis, juvenile
hiv infections	wolcott-rallison syndrome
diabetes mellitus, insulin-dependent, 19	glomerulonephritis, iga
dermatitis, atopic, 4	lymphoma, t-cell, peripheral
lymphoma, t-cell	tn syndrome
dermatitis, allergic contact	lymphoma, t-cell, peripheral
aids-related opportunistic infections	serum sickness
diabetes mellitus, insulin-dependent, 5	lymphoma, large-cell, anaplastic
hiv wasting syndrome	job syndrome
immunodysregulation, polyendocrinopathy, and enteropathy, x-linked	neuromyelitis optica
granulomatous disease, chronic, x-linked	t-lymphocytopenia
lymphoma, extranodal nk-t-cell	riddle syndrome
purpura, schoenlein-henoch	thyroiditis, autoimmune
asthma	familial cold autoinflammatory syndrome 1
aicardi-goutieres syndrome 5	glomerulonephritis, membranous
chediak-higashi syndrome	lymphoproliferative syndrome, ebv-associated, autosomal, 1
glomerulonephritis, iga	invasive pneumococcal disease, recurrent isolated, 2
griscelli syndrome type 2	lymphoma, follicular
diabetes mellitus, insulin-dependent, 22	lymphoma, extranodal nk-t-cell
addison disease	lymphoma, follicular
invasive pneumococcal disease, recurrent isolated, 2	myasthenia gravis
cd8 deficiency, familial	rheumatoid arthritis, systemic juvenile
kernicterus	muckle-wells syndrome
leukocyte adhesion deficiency, type iii	lymphoproliferative disorders
food hypersensitivity	leukocyte-adhesion deficiency syndrome
anaphylaxis	glomerulonephritis, iga
leukemia, t-cell	lymphoproliferative syndrome, x-linked, 2
immunodysregulation, polyendocrinopathy, and enteropathy, x-linked	peanut hypersensitivity
glomerulopathy with fibronectin deposits	immune complex diseases
drug eruptions	reticular dysgenesis
giant lymph node hyperplasia	lymphoma
ectodermal dysplasia, anhidrotic, with immunodeficiency, osteopetrosis, and lymphedema	encephalomyelitis, autoimmune, experimental
asthma-related traits, susceptibility to, 5	hypersensitivity, delayed
autoimmune polyendocrinopathy syndrome, type 1	x-linked combined immunodeficiency diseases
dermatitis, atopic, 4	diabetes mellitus, type 1
dermatitis, atopic, 2	neuropathy, hereditary sensory and autonomic, type ia
pemphigus	purpura, schoenlein-henoch
cd8 deficiency, familial	diabetes mellitus, insulin-dependent, 20
glomerulonephritis, iga	precursor cell lymphoblastic leukemia-lymphoma
noonan syndrome-like disorder with loose anagen hair	reticuloendotheliosis, familial, with eosinophilia
bare lymphocyte syndrome, type i	thyroiditis, autoimmune
cd8 deficiency, familial	multiple chemical sensitivity
dermatitis, atopic, 2	diffuse cerebral sclerosis of schilder
diabetes mellitus, insulin-dependent, 20	urticaria
leukemia, lymphocytic, chronic, b-cell	lymphoma
complement component 2 deficiency	lymphangioleiomyomatosis
bare lymphocyte syndrome 2	drug hypersensitivity
acquired angioedema	kernicterus
dysautonomia, familial	neuropathy, hereditary sensory and autonomic, type iia
lymphoma, extranodal nk-t-cell	thyrotoxic periodic paralysis, susceptibility to, 1
diabetes mellitus, insulin-dependent, 2	polyendocrinopathies, autoimmune
purpura, thrombocytopenic, idiopathic	severe combined immunodeficiency, autosomal recessive, t cell-negative, b cell-positive, nk cell-neg
granulomatous disease, chronic, autosomal recessive, cytochrome b-negative	hyper-igm immunodeficiency syndrome, type 1
diabetes mellitus, insulin-dependent, 12	precursor cell lymphoblastic leukemia-lymphoma
hyper-igm immunodeficiency syndrome	severe combined immunodeficiency, autosomal recessive, t cell-negative, b cell-positive, nk cell-neg
hereditary angioedema types i and ii	whim syndrome
aicardi-goutieres syndrome	noonan syndrome-like disorder with loose anagen hair
leukocyte adhesion deficiency type 1	myasthenia gravis
ectodermal dysplasia, hypohidrotic, with immune deficiency	hereditary angioedema types i and ii
lymphoma, t-cell	neuropathy, hereditary sensory and autonomic, type ia
complement component 5 deficiency	whim syndrome
autoimmune disease, susceptibility to, 1	neutrophil immunodeficiency syndrome
acquired angioedema	agammaglobulinemia 6, autosomal recessive
dermatitis, atopic, 4	multiple myeloma
muckle-wells syndrome	noonan syndrome-like disorder with or without juvenile myelomonocytic leukemia
autoimmune disease, susceptibility to, 1	severe combined immunodeficiency, autosomal recessive, t cell-negative, b cell-positive, nk cell-neg
hyper-igm immunodeficiency syndrome	pemphigoid, bullous
glomerulopathy with fibronectin deposits	tn syndrome
leukemia, lymphoid	wolcott-rallison syndrome
drug hypersensitivity	leukemia, lymphocytic, chronic, b-cell
diabetes mellitus, insulin-dependent, 19	hypersensitivity, immediate
common variable immunodeficiency	serum sickness
angioedemas, hereditary	lymphoma, follicular
hyper-ige recurrent infection syndrome, autosomal dominant	leukemia, t-cell
encephalomyelitis, autoimmune, experimental	rheumatoid arthritis, systemic juvenile
diabetes mellitus, insulin-dependent, 12	tyrosine kinase 2 deficiency
familial cold autoinflammatory syndrome 1	leukemia, t-cell
agammaglobulinemia 6, autosomal recessive	lymphangioleiomyomatosis
hiv-associated lipodystrophy syndrome	precursor t-cell lymphoblastic leukemia-lymphoma
lupus nephritis	pemphigoid, bullous
purpura, thrombocytopenic, idiopathic	x-linked combined immunodeficiency diseases
autoimmune diseases	leukocyte-adhesion deficiency syndrome
glomerulopathy with fibronectin deposits	stevens-johnson syndrome
chediak-higashi syndrome	myd88 deficiency
leukemia, t-cell	purpura, thrombocytopenic, idiopathic
hiv-associated lipodystrophy syndrome	severe combined immunodeficiency, autosomal recessive, t cell-negative, b cell-positive, nk cell-pos
diabetes mellitus, insulin-dependent, 22	iga deficiency
ectodermal dysplasia, anhidrotic, with immunodeficiency, osteopetrosis, and lymphedema	neutrophil immunodeficiency syndrome
lymphoma, b-cell	wiskott-aldrich syndrome
chediak-higashi syndrome	lymphoma, large b-cell, diffuse
immunodysregulation, polyendocrinopathy, and enteropathy, x-linked	t cell immunodeficiency primary
mevalonate kinase deficiency	t cell immunodeficiency primary
granuloma, foreign-body	immunoglobulin a deficiency 2
diabetes mellitus, insulin-dependent, 19	ige responsiveness, atopic
granuloma, foreign-body	muckle-wells syndrome
complement component 8 deficiency, type ii	hashimoto disease
immune dysfunction with t-cell inactivation due to calcium entry defect 1	myasthenia gravis
complement component 5 deficiency	hereditary sensory and autonomic neuropathies
lymphopenia	schimke immunoosseous dysplasia
immune dysfunction with t-cell inactivation due to calcium entry defect 1	uveomeningoencephalitic syndrome
immune dysfunction with t-cell inactivation due to calcium entry defect 2	invasive pneumococcal disease, recurrent isolated, 2
leukemia-lymphoma, adult t-cell	severe combined immunodeficiency, autosomal recessive, t cell-negative, b cell-positive, nk cell-pos
autoimmune lymphoproliferative syndrome, type iia	precursor b-cell lymphoblastic leukemia-lymphoma
immune complex diseases	leukemia, lymphoid
hiv infections	polyendocrinopathies, autoimmune
hereditary angioedema type iii	immunologic deficiency syndromes
ige responsiveness, atopic	leukemia-lymphoma, adult t-cell
aicardi-goutieres syndrome	polyendocrinopathies, autoimmune
hiv infections	lymphoproliferative disorders
lymphangioleiomyomatosis	severe combined immunodeficiency, autosomal recessive, t cell-negative, b cell-positive, nk cell-pos
autoimmune disease, susceptibility to, 1	precursor t-cell lymphoblastic leukemia-lymphoma
diabetes mellitus, insulin-dependent, 5	severe combined immunodeficiency with microcephaly, growth retardation, and sensitivity to ionizing
ectodermal dysplasia, anhidrotic, with immunodeficiency, osteopetrosis, and lymphedema	lymphoma, large b-cell, diffuse
interleukin 2 receptor, alpha, deficiency of	lymphopenia
lymphoproliferative syndrome, ebv-associated, autosomal, 1	severe combined immunodeficiency, autosomal recessive, t cell-negative, b cell-positive, nk cell-neg
hashimoto disease	lymphopenia
encephalopathy, acute, infection-induced, susceptibility to, 3	immune dysfunction with t-cell inactivation due to calcium entry defect 1
asthma, aspirin-induced	dermatitis, atopic
drug hypersensitivity	hypersensitivity, immediate
glomerulonephritis, iga	invasive pneumococcal disease, recurrent isolated, 1
lymphoma, t-cell, cutaneous	lymphopenia
complement component 8 deficiency, type i	kernicterus
asthma, aspirin-induced	lymphoma, t-cell
asthma, aspirin-induced	leukocyte adhesion deficiency type 1
hyper-igm immunodeficiency syndrome, type 1	severe combined immunodeficiency, autosomal recessive, t cell-negative, b cell-positive, nk cell-pos
lymphoma, large b-cell, diffuse	wolfram syndrome
graft vs host disease	riddle syndrome
diffuse cerebral sclerosis of schilder	encephalomyelitis, autoimmune, experimental
arthritis, rheumatoid	eosinophilic esophagitis
hiv seropositivity	immune dysfunction with t-cell inactivation due to calcium entry defect 1
arthritis, rheumatoid	neuropathy, hereditary sensory and autonomic, type ia
graves ophthalmopathy	lupus nephritis
agammaglobulinemia	lymphoma, t-cell
encephalopathy, acute, infection-induced, susceptibility to, 3	lymphoma, extranodal nk-t-cell
lymphoma, b-cell	peanut hypersensitivity
lupus nephritis	reticular dysgenesis
autoimmune disease, susceptibility to, 1	pemphigoid, bullous
autoimmune lymphoproliferative syndrome, type iia	hyper-igm immunodeficiency syndrome
sarcoidosis	sjogren's syndrome
arthritis, juvenile	hereditary sensory and autonomic neuropathies
purpura, thrombocytopenic, idiopathic	sarcoidosis, early-onset
graves ophthalmopathy	kernicterus
bare lymphocyte syndrome, type i	granulomatous disease, chronic, autosomal recessive, cytochrome b-positive, type ii
hiv wasting syndrome	neutrophil immunodeficiency syndrome
anaphylaxis	precursor cell lymphoblastic leukemia-lymphoma
complement component c1r/c1s deficiency	sarcoidosis
lupus nephritis	multiple sclerosis
lymphoma, large-cell, anaplastic	neuropathy, hereditary sensory and autonomic, type ic
diabetes mellitus, insulin-dependent, 2	granulomatous disease, chronic
asthma	dermatitis, atopic, 2
leukemia, t-cell	multiple sclerosis
neuropathy, hereditary sensory and autonomic, type ia	reticular dysgenesis
acquired angioedema	hereditary sensory and autonomic neuropathies
drug hypersensitivity	leukemia, lymphoid
alveolitis, extrinsic allergic	granuloma, foreign-body
leukocyte-adhesion deficiency syndrome	polyendocrinopathies, autoimmune
acquired immunodeficiency syndrome	complement component 6 deficiency
common variable immunodeficiency	lymphoproliferative syndrome, x-linked, 2
diabetes mellitus, insulin-dependent, 12	respiratory hypersensitivity
hereditary angioedema type iii	precursor t-cell lymphoblastic leukemia-lymphoma
hyper-igm immunodeficiency syndrome	thyrotoxic periodic paralysis, susceptibility to, 1
acquired immunodeficiency syndrome	hashimoto disease
leukemia, hairy cell	tyrosine kinase 2 deficiency
irak4 deficiency	lymphangioleiomyomatosis
complement component 8 deficiency, type ii	leukemia, lymphoid
aicardi-goutieres syndrome 5	glomerulopathy with fibronectin deposits
hepatic venoocclusive disease with immunodeficiency	hypersensitivity
immunoblastic lymphadenopathy	noonan syndrome-like disorder with or without juvenile myelomonocytic leukemia
granulomatous disease, chronic, autosomal recessive, cytochrome b-positive, type i	thyroiditis, autoimmune
angioedema	bare lymphocyte syndrome 2
acquired immunodeficiency syndrome	vitiligo-associated multiple autoimmune disease susceptibility 1
graft vs host disease	wiskott-aldrich syndrome
drug eruptions	leukocyte-adhesion deficiency syndrome
glomerulonephritis, iga	leukemia-lymphoma, adult t-cell
anaphylaxis	hereditary angioedema types i and ii
osteopetrosis, autosomal recessive 7	rheumatoid arthritis, systemic juvenile
hereditary angioedema types i and ii	lymphoma, t-cell, cutaneous
mevalonate kinase deficiency	pemphigus
asthma-related traits, susceptibility to, 5	combined cellular and humoral immune defects with granulomas
hiv wasting syndrome	leukocyte-adhesion deficiency syndrome
aicardi-goutieres syndrome 5	ectodermal dysplasia, anhidrotic, with t-cell immunodeficiency, autosomal dominant
granuloma, foreign-body	hepatitis, autoimmune
lupus nephritis	masp2 deficiency
alveolitis, extrinsic allergic	complement component 5 deficiency
hyper-igm immunodeficiency syndrome, type 1	noonan syndrome-like disorder with or without juvenile myelomonocytic leukemia
dysautonomia, familial	severe combined immunodeficiency due to adenosine deaminase deficiency
agammaglobulinemia 4, autosomal recessive	dermatitis, atopic, 2
lymphoma, non-hodgkin	severe combined immunodeficiency with sensitivity to ionizing radiation
bare lymphocyte syndrome, type i	lupus erythematosus, systemic
common variable immunodeficiency	hepatic venoocclusive disease with immunodeficiency
ige responsiveness, atopic	wolcott-rallison syndrome
cd8 deficiency, familial	encephalomyelitis, autoimmune, experimental
diabetes mellitus, type 1	hepatic venoocclusive disease with immunodeficiency
immune complex diseases	severe combined immunodeficiency
aids-related kaposi sarcoma	immune dysfunction with t-cell inactivation due to calcium entry defect 1
aicardi-goutieres syndrome 5	immunodeficiency due to defect in cd3-zeta
agammaglobulinemia	graft vs host disease
burkitt lymphoma	lymphoproliferative syndrome, ebv-associated, autosomal, 1
interleukin 2 receptor, alpha, deficiency of	tn syndrome
kernicterus	myd88 deficiency
autoimmune lymphoproliferative syndrome, type iia	immunodeficiency-centromeric instability-facial anomalies syndrome 1
complement component 8 deficiency, type ii	diabetes mellitus, insulin-dependent, 19
lymphoma, large b-cell, diffuse	severe combined immunodeficiency, autosomal recessive, t cell-negative, b cell-positive, nk cell-neg
angioedemas, hereditary	granulomatous disease, chronic, autosomal recessive, cytochrome b-negative
griscelli syndrome type 2	immunodeficiency due to defect in mapbp-interacting protein
alveolitis, extrinsic allergic	spondyloenchondrodysplasia
complement component 2 deficiency	early-onset ataxia with oculomotor apraxia and hypoalbuminemia
sjogren's syndrome	thyrotoxic periodic paralysis, susceptibility to, 1
ectodermal dysplasia, anhidrotic, with immunodeficiency, osteopetrosis, and lymphedema	noonan syndrome-like disorder with or without juvenile myelomonocytic leukemia
diabetes mellitus, type 1	severe combined immunodeficiency, autosomal recessive, t cell-negative, b cell-positive, nk cell-pos
acquired angioedema	diabetes mellitus, insulin-dependent, 10
glomerulonephritis, iga	granulomatous disease, chronic, autosomal recessive, cytochrome b-positive, type ii
hypersensitivity, immediate	immunoblastic lymphadenopathy
diabetes mellitus, insulin-dependent, 20	lymphoproliferative syndrome, x-linked, 2
hyper-igm immunodeficiency syndrome	whim syndrome
aicardi-goutieres syndrome	kernicterus
agammaglobulinemia	diabetes mellitus, insulin-dependent, 2
invasive pneumococcal disease, recurrent isolated, 2	severe combined immunodeficiency, autosomal recessive, t cell-negative, b cell-negative, nk cell-pos
hereditary angioedema type iii	respiratory hypersensitivity
complement component 6 deficiency	hiv wasting syndrome
asthma, aspirin-induced	cd8 deficiency, familial
dermatitis, atopic, 4	diabetes mellitus, insulin-dependent, 10
complement component 7 deficiency	lymphoma, mantle-cell
diabetes mellitus, insulin-dependent, 2	immune dysfunction with t-cell inactivation due to calcium entry defect 1
hiv-associated lipodystrophy syndrome	leukemia, t-cell
arthritis, rheumatoid	mevalonate kinase deficiency
acquired immunodeficiency syndrome	leukemia, lymphocytic, chronic, b-cell
dermatitis, atopic, 1	lymphoma, non-hodgkin
agammaglobulinemia	wiskott-aldrich syndrome
immunologic deficiency syndromes	sjogren's syndrome
hyper-igm immunodeficiency syndrome, type 1	lupus nephritis
ataxia telangiectasia	common variable immunodeficiency
dermatitis, atopic, 1	graves ophthalmopathy
hiv wasting syndrome	masp2 deficiency
rheumatoid arthritis, systemic juvenile	severe combined immunodeficiency with microcephaly, growth retardation, and sensitivity to ionizing
immune dysfunction with t-cell inactivation due to calcium entry defect 2	lymphopenia
cd8 deficiency, familial	lymphoma, t-cell, cutaneous
iga deficiency	polyendocrinopathies, autoimmune
bare lymphocyte syndrome 2	severe combined immunodeficiency, autosomal recessive, t cell-negative, b cell-positive, nk cell-neg
complement component 2 deficiency	leukocyte-adhesion deficiency syndrome
asthma-related traits, susceptibility to, 7	complement component 5 deficiency
asthma-related traits, susceptibility to, 7	neuropathy, hereditary sensory and autonomic, type ic
dermatitis, atopic	immunoglobulin a deficiency 2
precursor cell lymphoblastic leukemia-lymphoma	reticuloendotheliosis, familial, with eosinophilia
ataxia telangiectasia	glomerulonephritis, membranous
chediak-higashi syndrome	food hypersensitivity
complement component 5 deficiency	leukemia, t-cell
diabetes mellitus, insulin-dependent, 2	hypogammaglobulinemia and isolated growth hormone deficiency, x-linked
aids-related kaposi sarcoma	wiskott-aldrich syndrome
complement component 8 deficiency, type i	sarcoidosis
granuloma, foreign-body	purpura, thrombotic thrombocytopenic
complement component 8 deficiency, type i	multiple sclerosis, relapsing-remitting
food hypersensitivity	rhinitis, allergic, perennial
autoimmune diseases	common variable immunodeficiency
granulomatous disease, chronic	lymphoma, b-cell
acquired angioedema	immunodeficiency without anhidrotic ectodermal dysplasia
dysautonomia, familial	lupus nephritis
leukocyte-adhesion deficiency syndrome	vitiligo-associated multiple autoimmune disease susceptibility 1
lymphoma, non-hodgkin	vitiligo-associated multiple autoimmune disease susceptibility 1
immune dysfunction with t-cell inactivation due to calcium entry defect 2	wolfram syndrome
autoimmune disease, susceptibility to, 1	hepatitis, autoimmune
immunodeficiency without anhidrotic ectodermal dysplasia	purpura, thrombotic thrombocytopenic
complement component 7 deficiency	diabetes mellitus, type 1
griscelli syndrome type 2	hyper-igm immunodeficiency syndrome
acquired immunodeficiency syndrome	dysautonomia, familial
hiv-associated lipodystrophy syndrome	severe combined immunodeficiency
arthritis, rheumatoid	familial cold autoinflammatory syndrome 1
acquired angioedema	diabetes mellitus, insulin-dependent, 12
kernicterus	severe combined immunodeficiency, autosomal recessive, t cell-negative, b cell-negative, nk cell-pos
arthritis, rheumatoid	autoimmune disease, susceptibility to, 1
aids-related kaposi sarcoma	multiple myeloma
lymphoma, non-hodgkin	schimke immunoosseous dysplasia
immune dysfunction with t-cell inactivation due to calcium entry defect 1	riddle syndrome
chediak-higashi syndrome	ige responsiveness, atopic
polyendocrinopathies, autoimmune	severe combined immunodeficiency, autosomal recessive, t cell-negative, b cell-negative, nk cell-pos
immunodeficiency due to defect in cd3-zeta	precursor cell lymphoblastic leukemia-lymphoma
complement component 8 deficiency, type ii	invasive pneumococcal disease, recurrent isolated, 1
hyper-igm immunodeficiency syndrome	neutrophil immunodeficiency syndrome
aicardi-goutieres syndrome 5	hereditary angioedema type iii
familial cold autoinflammatory syndrome 1	precursor cell lymphoblastic leukemia-lymphoma
lymphoproliferative disorders	polyendocrinopathies, autoimmune
autoimmune lymphoproliferative syndrome	wolfram syndrome
lupus erythematosus, systemic	lymphoma, large b-cell, diffuse
immunodeficiency without anhidrotic ectodermal dysplasia	t cell immunodeficiency primary
acquired immunodeficiency syndrome	complement component 7 deficiency
hypogammaglobulinemia and isolated growth hormone deficiency, x-linked	invasive pneumococcal disease, recurrent isolated, 1
granulomatous disease, chronic, autosomal recessive, cytochrome b-positive, type i	hypersensitivity
lymphoma, extranodal nk-t-cell	mevalonate kinase deficiency
kernicterus	noonan syndrome-like disorder with or without juvenile myelomonocytic leukemia
leukemia, lymphoid	schimke immunoosseous dysplasia
hypersensitivity, delayed	leukocyte adhesion deficiency type 1
diabetes mellitus, insulin-dependent, 22	food hypersensitivity
common variable immunodeficiency	granulomatous disease, chronic, autosomal recessive, cytochrome b-positive, type i
graves ophthalmopathy	immunodeficiency-centromeric instability-facial anomalies syndrome 1
bare lymphocyte syndrome 2	glomerulonephritis, iga
diabetes mellitus, insulin-dependent, 19	lymphoproliferative syndrome, ebv-associated, autosomal, 1
diabetes mellitus, insulin-dependent, 5	mevalonate kinase deficiency
multiple chemical sensitivity	x-linked combined immunodeficiency diseases
hereditary angioedema types i and ii	lymphoma, large b-cell, diffuse
food hypersensitivity	immunologic deficiency syndromes
bare lymphocyte syndrome, type i	invasive pneumococcal disease, recurrent isolated, 2
dermatitis, atopic, 4	eosinophilic esophagitis
diabetes mellitus, type 1	tyrosine kinase 2 deficiency
burkitt lymphoma	leukemia-lymphoma, adult t-cell
glomerulonephritis, membranous	granuloma, plasma cell
hiv infections	hypogammaglobulinemia and isolated growth hormone deficiency, x-linked
complement component 6 deficiency	wolfram syndrome
diabetes mellitus, insulin-dependent, 20	hyper-igm immunodeficiency syndrome, type 1
osteopetrosis, autosomal recessive 7	precursor t-cell lymphoblastic leukemia-lymphoma
granuloma, foreign-body	hyper-ige recurrent infection syndrome, autosomal dominant
diabetes mellitus, insulin-dependent, 5	noonan syndrome-like disorder with or without juvenile myelomonocytic leukemia
rheumatoid arthritis, systemic juvenile	thyrotoxic periodic paralysis, susceptibility to, 1
asthma-related traits, susceptibility to, 7	immunodysregulation, polyendocrinopathy, and enteropathy, x-linked
granulomatous disease, chronic	severe combined immunodeficiency due to adenosine deaminase deficiency
complement component 7 deficiency	reticular dysgenesis
aicardi-goutieres syndrome	severe combined immunodeficiency
hereditary angioedema type iii	lymphopenia
glomerulonephritis, iga	glomerulonephritis, membranous
hypersensitivity, immediate	leukemia, lymphocytic, chronic, b-cell
acquired immunodeficiency syndrome	rheumatoid arthritis, systemic juvenile
leukemia, t-cell	lupus nephritis
immunoglobulin a deficiency 2	thyrotoxic periodic paralysis, susceptibility to, 1
complement component 8 deficiency, type ii	interleukin 2 receptor, alpha, deficiency of
encephalopathy, acute, infection-induced, susceptibility to, 3	granulomatous disease, chronic
band-like calcification with simplified gyration and polymicrogyria	hereditary angioedema types i and ii
ataxia telangiectasia	precursor t-cell lymphoblastic leukemia-lymphoma
agammaglobulinemia 4, autosomal recessive	leukocyte adhesion deficiency, type iii
bare lymphocyte syndrome 2	t cell immunodeficiency primary
complement component 8 deficiency, type i	leukocyte adhesion deficiency type 1
immunologic deficiency syndromes	purpura, thrombocytopenic, idiopathic
giant lymph node hyperplasia	immunodeficiency due to defect in mapbp-interacting protein
alveolitis, extrinsic allergic	drug hypersensitivity
drug eruptions	leukocyte adhesion deficiency type 1
dermatitis, atopic, 2	kernicterus
diabetes mellitus, insulin-dependent, 20	food hypersensitivity
diabetes mellitus, insulin-dependent, 10	granuloma, respiratory tract
bare lymphocyte syndrome, type i	graft vs host disease
acquired immunodeficiency syndrome	ataxia telangiectasia
agammaglobulinemia 4, autosomal recessive	neuropathy, hereditary sensory and autonomic, type ia
cd8 deficiency, familial	hiv seropositivity
diabetes mellitus, insulin-dependent, 22	riddle syndrome
drug hypersensitivity	myasthenia gravis
graves disease	hiv infections
glomerulonephritis, membranoproliferative	granulomatous disease, chronic, autosomal recessive, cytochrome b-negative
anaphylaxis	purpura, thrombotic thrombocytopenic
lymphoma	pemphigoid, bullous
diabetes mellitus, type 1	leukemia, t-cell
hyper-igm immunodeficiency syndrome	leukocyte-adhesion deficiency syndrome
drug eruptions	lymphoma
dermatitis, atopic, 1	hepatic venoocclusive disease with immunodeficiency
chediak-higashi syndrome	multiple myeloma
complement component 7 deficiency	leukocyte adhesion deficiency, type iii
diabetes mellitus, insulin-dependent, 22	graves disease
ige responsiveness, atopic	lymphangioleiomyomatosis
alpha/beta t-cell lymphopenia with gamma/delta t-cell expansion, severe cytomegalovirus infection, a	thyrotoxic periodic paralysis, susceptibility to, 1
multiple chemical sensitivity	t cell immunodeficiency primary
dermatitis, atopic, 2	glomerulonephritis, membranoproliferative
ige responsiveness, atopic	wolfram syndrome
angioedemas, hereditary	lymphoma, extranodal nk-t-cell
autoimmune polyendocrinopathy syndrome, type 1	combined cellular and humoral immune defects with granulomas
granuloma, foreign-body	immunoblastic lymphadenopathy
granulomatous disease, chronic	lupus erythematosus, systemic
masp2 deficiency	severe combined immunodeficiency with sensitivity to ionizing radiation
addison disease	rheumatoid arthritis, systemic juvenile
hodgkin disease	spondyloenchondrodysplasia
hyper-igm immunodeficiency syndrome	uveomeningoencephalitic syndrome
dermatitis, atopic, 2	hashimoto disease
bare lymphocyte syndrome, type i	lymphopenia
asthma-related traits, susceptibility to, 7	neuropathy, hereditary sensory and autonomic, type iia
acquired immunodeficiency syndrome	alpha/beta t-cell lymphopenia with gamma/delta t-cell expansion, severe cytomegalovirus infection, a
complement component 4, partial deficiency of	diabetes mellitus, type 1
lymphoma, large b-cell, diffuse	uveomeningoencephalitic syndrome
ectodermal dysplasia, anhidrotic, with t-cell immunodeficiency, autosomal dominant	thyroiditis, autoimmune
diffuse cerebral sclerosis of schilder	graft vs host disease
immunodeficiency without anhidrotic ectodermal dysplasia	leukemia-lymphoma, adult t-cell
hyper-ige recurrent infection syndrome, autosomal dominant	wiskott-aldrich syndrome
hyper-ige recurrent infection syndrome, autosomal dominant	immunodeficiency-centromeric instability-facial anomalies syndrome 1
arthritis, juvenile	lymphangioleiomyomatosis
complement component 8 deficiency, type ii	drug hypersensitivity
arthritis, juvenile	drug hypersensitivity
drug hypersensitivity	eosinophilic esophagitis
aids-related opportunistic infections	vitiligo-associated multiple autoimmune disease susceptibility 1
asthma-related traits, susceptibility to, 5	stevens-johnson syndrome
leukemia, lymphoid	muckle-wells syndrome
complement component c1r/c1s deficiency	hiv-associated lipodystrophy syndrome
drug hypersensitivity	lymphoproliferative syndrome, ebv-associated, autosomal, 1
bare lymphocyte syndrome 2	leukemia, t-cell
dermatitis, atopic, 2	uveomeningoencephalitic syndrome
immunoblastic lymphadenopathy	reticuloendotheliosis, familial, with eosinophilia
addison disease	anaphylaxis
neuropathy, hereditary sensory and autonomic, type ic	severe combined immunodeficiency, autosomal recessive, t cell-negative, b cell-positive, nk cell-pos
hyper-ige recurrent infection syndrome, autosomal dominant	pemphigus
aicardi-goutieres syndrome 5	asthma
diabetes mellitus, insulin-dependent, 10	serum sickness
aicardi-goutieres syndrome	bare lymphocyte syndrome 2
lymphoproliferative disorders	multiple chemical sensitivity
arthritis, rheumatoid	stevens-johnson syndrome
immunodeficiency due to defect in cd3-zeta	sarcoidosis
complement component 7 deficiency	muckle-wells syndrome
noonan syndrome-like disorder with or without juvenile myelomonocytic leukemia	precursor t-cell lymphoblastic leukemia-lymphoma
precursor cell lymphoblastic leukemia-lymphoma	rheumatoid arthritis, systemic juvenile
complement component 8 deficiency, type i	urticaria
peanut hypersensitivity	severe combined immunodeficiency due to adenosine deaminase deficiency
dermatitis, atopic, 2	hiv seropositivity
encephalopathy, acute, infection-induced, susceptibility to, 3	lymphoma, t-cell
complement component 6 deficiency	immunodysregulation, polyendocrinopathy, and enteropathy, x-linked
immunoblastic lymphadenopathy	immunodysregulation, polyendocrinopathy, and enteropathy, x-linked
autoimmune disease, susceptibility to, 1	sarcoidosis, early-onset
ectodermal dysplasia, hypohidrotic, with immune deficiency	graves ophthalmopathy
neuropathy, hereditary sensory and autonomic, type ia	purpura, thrombocytopenic, idiopathic
lymphoma, mantle-cell	spondyloenchondrodysplasia
complement component 7 deficiency	severe combined immunodeficiency
immune dysfunction with t-cell inactivation due to calcium entry defect 1	spondyloenchondrodysplasia
bare lymphocyte syndrome 2	leukemia-lymphoma, adult t-cell
familial cold autoinflammatory syndrome 1	glomerulonephritis, membranoproliferative	leukemia-lymphoma, adult t-cell
acquired immunodeficiency syndrome	immunodeficiency due to defect in cd3-zeta	lymphoma, follicular
leukemia, lymphoid	leukocyte adhesion deficiency type 1	lymphoma, large b-cell, diffuse
addison disease	chediak-higashi syndrome	hereditary angioedema types i and ii
anaphylaxis	hypersensitivity, delayed	rhinitis, allergic, perennial
diabetes mellitus, insulin-dependent, 20	hiv-associated lipodystrophy syndrome	uveomeningoencephalitic syndrome
drug eruptions	griscelli syndrome type 2	invasive pneumococcal disease, recurrent isolated, 2
eosinophilic esophagitis	myasthenia gravis	precursor b-cell lymphoblastic leukemia-lymphoma
drug hypersensitivity	hiv wasting syndrome	wolfram syndrome
autoimmune lymphoproliferative syndrome	lymphoma, t-cell	respiratory hypersensitivity
complement component 8 deficiency, type i	hiv seropositivity	multiple myeloma
leukocyte adhesion deficiency, type iii	lupus nephritis	reticular dysgenesis
granulomatous disease, chronic, x-linked	hereditary angioedema types i and ii	lymphoma, mantle-cell
complement component 4, partial deficiency of	lymphoma, mantle-cell	whim syndrome
agammaglobulinemia 6, autosomal recessive	precursor b-cell lymphoblastic leukemia-lymphoma	urticaria
agammaglobulinemia 6, autosomal recessive	granulomatous disease, chronic, autosomal recessive, cytochrome b-positive, type i	tyrosine kinase 2 deficiency
bruton type agammaglobulinemia	ectodermal dysplasia, anhidrotic, with t-cell immunodeficiency, autosomal dominant	muckle-wells syndrome
hashimoto disease	immunoglobulin a deficiency 2	mevalonate kinase deficiency
bruton type agammaglobulinemia	granuloma, foreign-body	graves disease
granuloma, plasma cell	hypogammaglobulinemia and isolated growth hormone deficiency, x-linked	uveomeningoencephalitic syndrome
acquired angioedema	graves disease	hereditary angioedema type iii
granulomatous disease, chronic, x-linked	hypersensitivity, delayed	tyrosine kinase 2 deficiency
masp2 deficiency	neuropathy, hereditary sensory and autonomic, type ic	reticular dysgenesis
cd8 deficiency, familial	interleukin 2 receptor, alpha, deficiency of	reticular dysgenesis
autoimmune polyendocrinopathy syndrome, type 1	sjogren's syndrome	wolfram syndrome
complement component c1r/c1s deficiency	noonan syndrome-like disorder with loose anagen hair	x-linked combined immunodeficiency diseases
complement component 2 deficiency	leukemia, lymphocytic, chronic, b-cell	precursor b-cell lymphoblastic leukemia-lymphoma
bare lymphocyte syndrome, type i	graft vs host disease	precursor t-cell lymphoblastic leukemia-lymphoma
agammaglobulinemia	griscelli syndrome type 2	lupus nephritis
agammaglobulinemia	food hypersensitivity	multiple myeloma
common variable immunodeficiency	ectodermal dysplasia, anhidrotic, with t-cell immunodeficiency, autosomal dominant	lupus erythematosus, systemic
aids-related opportunistic infections	hyper-ige recurrent infection syndrome, autosomal dominant	kernicterus
acquired immunodeficiency syndrome	dysautonomia, familial	multiple chemical sensitivity
acquired immunodeficiency syndrome	severe combined immunodeficiency with microcephaly, growth retardation, and sensitivity to ionizing	whim syndrome
arthritis, juvenile	leukocyte adhesion deficiency type 1	myd88 deficiency
autoimmune diseases	cd8 deficiency, familial	leukemia, hairy cell
complement component 7 deficiency	hypersensitivity	precursor b-cell lymphoblastic leukemia-lymphoma
diabetes mellitus, insulin-dependent, 22	lymphopenia	osteopetrosis, autosomal recessive 7
ectodermal dysplasia, anhidrotic, with t-cell immunodeficiency, autosomal dominant	granulomatous disease, chronic	osteopetrosis, autosomal recessive 7
food hypersensitivity	hodgkin disease	pemphigus
bruton type agammaglobulinemia	dysautonomia, familial	multiple sclerosis, relapsing-remitting
band-like calcification with simplified gyration and polymicrogyria	leukemia, hairy cell	peanut hypersensitivity
dermatitis, atopic, 2	granuloma, foreign-body	myasthenia gravis
anaphylaxis	dermatitis, atopic, 2	uveomeningoencephalitic syndrome
immunoglobulin a deficiency 2	lymphoproliferative disorders	pemphigoid, bullous
graves ophthalmopathy	leukocyte-adhesion deficiency syndrome	multiple sclerosis
alveolitis, extrinsic allergic	bare lymphocyte syndrome, type i	urticaria
hiv infections	lymphoma, t-cell, cutaneous	purpura, thrombotic thrombocytopenic
alpha/beta t-cell lymphopenia with gamma/delta t-cell expansion, severe cytomegalovirus infection, a	glomerulopathy with fibronectin deposits	leukemia-lymphoma, adult t-cell
dermatitis, allergic contact	graves ophthalmopathy	immunodeficiency-centromeric instability-facial anomalies syndrome 1
agammaglobulinemia 4, autosomal recessive	lig4 syndrome	lymphoma
aids-related kaposi sarcoma	diabetes mellitus, type 1	thyroiditis, autoimmune
encephalopathy, acute, infection-induced, susceptibility to, 3	granulomatous disease, chronic, autosomal recessive, cytochrome b-positive, type i	immunodeficiency-centromeric instability-facial anomalies syndrome 1
complement component 5 deficiency	hashimoto disease	immune dysfunction with t-cell inactivation due to calcium entry defect 2
autoimmune lymphoproliferative syndrome	invasive pneumococcal disease, recurrent isolated, 2	lymphoma, large b-cell, diffuse
cd8 deficiency, familial	complement component 4, partial deficiency of	reticuloendotheliosis, familial, with eosinophilia
agammaglobulinemia 4, autosomal recessive	immune dysfunction with t-cell inactivation due to calcium entry defect 1	lymphoma, non-hodgkin
dermatitis, atopic, 4	interleukin 2 receptor, alpha, deficiency of	leukemia-lymphoma, adult t-cell
aids-related opportunistic infections	neuropathy, hereditary sensory and autonomic, type iia	purpura, thrombotic thrombocytopenic
graves ophthalmopathy	hepatitis, autoimmune	hypersensitivity
aicardi-goutieres syndrome 5	diabetes mellitus, insulin-dependent, 22	glomerulonephritis, membranous
bare lymphocyte syndrome 2	bare lymphocyte syndrome, type i	sjogren's syndrome
invasive pneumococcal disease, recurrent isolated, 1	rhinitis, allergic, perennial	severe combined immunodeficiency, autosomal recessive, t cell-negative, b cell-positive, nk cell-pos
diffuse cerebral sclerosis of schilder	neuropathy, hereditary sensory and autonomic, type ia	polyendocrinopathies, autoimmune
common variable immunodeficiency	complement component 2 deficiency	dermatitis, atopic, 2
arthritis, rheumatoid	immunodeficiency due to defect in cd3-zeta	job syndrome
leukemia, t-cell	mevalonate kinase deficiency	purpura, thrombocytopenic, idiopathic
aicardi-goutieres syndrome 5	angioedema	pemphigus
diabetes mellitus, insulin-dependent, 5	myd88 deficiency	severe combined immunodeficiency
lymphoma, t-cell, peripheral	mevalonate kinase deficiency	purpura, schoenlein-henoch
ataxia telangiectasia	cd8 deficiency, familial	ectodermal dysplasia, anhidrotic, with immunodeficiency, osteopetrosis, and lymphedema
agammaglobulinemia 6, autosomal recessive	diabetes mellitus, insulin-dependent, 19	immunoglobulin a deficiency 2
asthma-related traits, susceptibility to, 7	granulomatous disease, chronic, autosomal recessive, cytochrome b-positive, type ii	irak4 deficiency
drug eruptions	neuromyelitis optica	precursor t-cell lymphoblastic leukemia-lymphoma
dermatitis, atopic, 2	diabetes mellitus, insulin-dependent, 12	glomerulonephritis, iga
complement component 8 deficiency, type ii	eosinophilic esophagitis	granuloma, respiratory tract
complement component 2 deficiency	immunodysregulation, polyendocrinopathy, and enteropathy, x-linked	whim syndrome
food hypersensitivity	schimke immunoosseous dysplasia	urticaria
hypersensitivity	multiple sclerosis	pemphigoid, bullous
immunodysregulation, polyendocrinopathy, and enteropathy, x-linked	neuropathy, hereditary sensory and autonomic, type iia	stevens-johnson syndrome
autoimmune lymphoproliferative syndrome	interleukin 2 receptor, alpha, deficiency of	severe combined immunodeficiency
ectodermal dysplasia, hypohidrotic, with immune deficiency	hiv seropositivity	lymphoma, follicular
hiv wasting syndrome	hyper-igm immunodeficiency syndrome	x-linked combined immunodeficiency diseases
ectodermal dysplasia, hypohidrotic, with immune deficiency	granulomatous disease, chronic	t cell immunodeficiency primary
lymphoma, large-cell, anaplastic	serum sickness	sjogren's syndrome
ataxia telangiectasia	chediak-higashi syndrome	tn syndrome
immune complex diseases	lymphoma, t-cell	t-lymphocytopenia
dermatitis, allergic contact	glomerulopathy with fibronectin deposits	immunodeficiency without anhidrotic ectodermal dysplasia
diabetes mellitus, insulin-dependent, 2	precursor b-cell lymphoblastic leukemia-lymphoma	wolfram syndrome
angioedemas, hereditary	complement component c1r/c1s deficiency	lymphoma, large-cell, anaplastic
granulomatous disease, chronic, x-linked	hiv seropositivity	neuropathy, hereditary sensory and autonomic, type iia
griscelli syndrome type 2	lupus erythematosus, systemic	lymphoma, mantle-cell
arthritis, juvenile	granulomatous disease, chronic, autosomal recessive, cytochrome b-positive, type i	lupus erythematosus, systemic
alpha/beta t-cell lymphopenia with gamma/delta t-cell expansion, severe cytomegalovirus infection, a	autoimmune lymphoproliferative syndrome, type iia	kernicterus
hypersensitivity, delayed	multiple sclerosis, relapsing-remitting	severe combined immunodeficiency due to adenosine deaminase deficiency
alpha/beta t-cell lymphopenia with gamma/delta t-cell expansion, severe cytomegalovirus infection, a	hypersensitivity, delayed	immunodeficiency-centromeric instability-facial anomalies syndrome 1
hypersensitivity, delayed	neuropathy, hereditary sensory and autonomic, type iia	stevens-johnson syndrome
bare lymphocyte syndrome 2	ige responsiveness, atopic	spondyloenchondrodysplasia
diabetes mellitus, insulin-dependent, 2	diabetes mellitus, insulin-dependent, 5	lymphopenia
arthritis, juvenile	bare lymphocyte syndrome 2	peanut hypersensitivity
myd88 deficiency	reticular dysgenesis	stevens-johnson syndrome
familial cold autoinflammatory syndrome 1	leukocyte adhesion deficiency type 1	wolfram syndrome
complement component 8 deficiency, type i	glomerulonephritis, membranoproliferative	neuropathy, hereditary sensory and autonomic, type ic
complement component 8 deficiency, type i	graves disease	severe combined immunodeficiency due to adenosine deaminase deficiency
graves ophthalmopathy	hiv-associated lipodystrophy syndrome	muckle-wells syndrome
immunodeficiency due to defect in mapbp-interacting protein	lymphoma, large b-cell, diffuse	precursor b-cell lymphoblastic leukemia-lymphoma
dermatitis, atopic, 4	immunodeficiency due to defect in mapbp-interacting protein	purpura, thrombocytopenic, idiopathic
granulomatous disease, chronic	graves ophthalmopathy	vitiligo-associated multiple autoimmune disease susceptibility 1
hepatitis, autoimmune	lymphoma, t-cell, cutaneous	rheumatoid arthritis, systemic juvenile
bruton type agammaglobulinemia	dermatitis, atopic, 4	giant lymph node hyperplasia
severe combined immunodeficiency, autosomal recessive, t cell-negative, b cell-positive, nk cell-neg	sjogren's syndrome	tyrosine kinase 2 deficiency
diabetes mellitus, insulin-dependent, 19	osteopetrosis, autosomal recessive 7	purpura, thrombocytopenic, idiopathic
invasive pneumococcal disease, recurrent isolated, 1	leukemia, lymphoid	neuromyelitis optica
diabetes mellitus, insulin-dependent, 20	hypogammaglobulinemia and isolated growth hormone deficiency, x-linked	severe combined immunodeficiency with microcephaly, growth retardation, and sensitivity to ionizing
aicardi-goutieres syndrome 5	hepatic venoocclusive disease with immunodeficiency	urticaria
band-like calcification with simplified gyration and polymicrogyria	iga deficiency	t-lymphocytopenia
acquired immunodeficiency syndrome	hereditary sensory and autonomic neuropathies	precursor t-cell lymphoblastic leukemia-lymphoma
ectodermal dysplasia, anhidrotic, with immunodeficiency, osteopetrosis, and lymphedema	iga deficiency	pemphigoid, bullous
hyper-ige recurrent infection syndrome, autosomal dominant	mevalonate kinase deficiency	severe combined immunodeficiency, autosomal recessive, t cell-negative, b cell-positive, nk cell-pos
ataxia telangiectasia	complement component 2 deficiency	graves disease
anaphylaxis	immunodeficiency due to defect in cd3-zeta	serum sickness
complement component 5 deficiency	granulomatous disease, chronic, autosomal recessive, cytochrome b-positive, type ii	leukocyte-adhesion deficiency syndrome
leukemia, hairy cell	lymphoma, non-hodgkin	neuromyelitis optica
hereditary angioedema type iii	sarcoidosis, early-onset	vitiligo-associated multiple autoimmune disease susceptibility 1
arthritis, juvenile	ige responsiveness, atopic	wolfram syndrome
hereditary sensory and autonomic neuropathies	leukemia, lymphocytic, chronic, b-cell	sarcoidosis
dermatitis, atopic	immunoblastic lymphadenopathy	lupus nephritis
hiv-associated lipodystrophy syndrome	purpura, schoenlein-henoch	wolfram syndrome
addison disease	osteopetrosis, autosomal recessive 7	t-lymphocytopenia
lymphoproliferative disorders	neuropathy, hereditary sensory and autonomic, type ic	whim syndrome
asthma-related traits, susceptibility to, 5	myasthenia gravis	schimke immunoosseous dysplasia
autoimmune disease, susceptibility to, 1	leukemia, t-cell	peanut hypersensitivity
autoimmune lymphoproliferative syndrome, type iia	diffuse cerebral sclerosis of schilder	schimke immunoosseous dysplasia
diabetes mellitus, insulin-dependent, 20	dysautonomia, familial	t-lymphocytopenia
arthritis, rheumatoid	lupus nephritis	precursor cell lymphoblastic leukemia-lymphoma
food hypersensitivity	graves disease	severe combined immunodeficiency
hepatic venoocclusive disease with immunodeficiency	lymphopenia	masp2 deficiency
acquired angioedema	hashimoto disease	immunodeficiency without anhidrotic ectodermal dysplasia
granuloma, plasma cell	hypersensitivity, delayed	ige responsiveness, atopic
ectodermal dysplasia, anhidrotic, with immunodeficiency, osteopetrosis, and lymphedema	multiple sclerosis, relapsing-remitting	precursor cell lymphoblastic leukemia-lymphoma
addison disease	lymphoma, t-cell, peripheral	thyrotoxic periodic paralysis, susceptibility to, 1
aicardi-goutieres syndrome 5	purpura, schoenlein-henoch	x-linked combined immunodeficiency diseases
aicardi-goutieres syndrome 5	diabetes mellitus, insulin-dependent, 10	sarcoidosis, early-onset
diabetes mellitus, insulin-dependent, 5	granulomatous disease, chronic, x-linked	x-linked combined immunodeficiency diseases
agammaglobulinemia	encephalopathy, acute, infection-induced, susceptibility to, 3	immunodeficiency-centromeric instability-facial anomalies syndrome 1
autoimmune lymphoproliferative syndrome	hashimoto disease	hereditary angioedema types i and ii
dysautonomia, familial	kernicterus	lupus erythematosus, systemic
dermatitis, atopic	diffuse cerebral sclerosis of schilder	myasthenia gravis
autoimmune lymphoproliferative syndrome	burkitt lymphoma	complement component 2 deficiency
asthma	complement component 6 deficiency	dermatitis, atopic, 4
leukocyte adhesion deficiency, type iii	mevalonate kinase deficiency	rheumatoid arthritis, systemic juvenile
angioedemas, hereditary	graves ophthalmopathy	rheumatoid arthritis, systemic juvenile
arthritis, juvenile	complement component 7 deficiency	tn syndrome
acquired angioedema	agammaglobulinemia	neuromyelitis optica
familial cold autoinflammatory syndrome 1	granulomatous disease, chronic, autosomal recessive, cytochrome b-positive, type i	hyper-ige recurrent infection syndrome, autosomal dominant
autoimmune lymphoproliferative syndrome	immune complex diseases	thyroiditis, autoimmune
drug eruptions	early-onset ataxia with oculomotor apraxia and hypoalbuminemia	t-lymphocytopenia
lymphoma, large-cell, anaplastic	neuropathy, hereditary sensory and autonomic, type ic	sjogren's syndrome
angioedema	mevalonate kinase deficiency	t-lymphocytopenia
granuloma, plasma cell	irak4 deficiency	rhinitis, allergic, perennial
hyper-ige recurrent infection syndrome, autosomal dominant	purpura, thrombotic thrombocytopenic	reticuloendotheliosis, familial, with eosinophilia
glomerulonephritis, iga	glomerulonephritis, membranoproliferative	graft vs host disease
agammaglobulinemia 4, autosomal recessive	ectodermal dysplasia, hypohidrotic, with immune deficiency	hypogammaglobulinemia and isolated growth hormone deficiency, x-linked
arthritis, rheumatoid	hepatic venoocclusive disease with immunodeficiency	pemphigus
autoimmune disease, susceptibility to, 1	noonan syndrome-like disorder with loose anagen hair	vitiligo-associated multiple autoimmune disease susceptibility 1
glomerulonephritis, membranoproliferative	lymphoma, large-cell, anaplastic	rheumatoid arthritis, systemic juvenile
dermatitis, atopic, 1	lymphoma	wolcott-rallison syndrome
dermatitis, atopic, 1	leukemia, t-cell	osteopetrosis, autosomal recessive 7
giant lymph node hyperplasia	lymphoma, mantle-cell	lymphoma, t-cell, cutaneous
angioedemas, hereditary	leukemia, hairy cell	lymphoma, b-cell
band-like calcification with simplified gyration and polymicrogyria	immunodeficiency due to defect in cd3-zeta	purpura, schoenlein-henoch
bare lymphocyte syndrome 2	masp2 deficiency	riddle syndrome
addison disease	complement component 2 deficiency	hereditary sensory and autonomic neuropathies
cd8 deficiency, familial	immunodeficiency due to defect in cd3-zeta	riddle syndrome
diabetes mellitus, insulin-dependent, 12	riddle syndrome	thyrotoxic periodic paralysis, susceptibility to, 1
hiv wasting syndrome	purpura, schoenlein-henoch	severe combined immunodeficiency with microcephaly, growth retardation, and sensitivity to ionizing
kernicterus	lymphoma, non-hodgkin	t-lymphocytopenia
asthma-related traits, susceptibility to, 5	iga deficiency	sarcoidosis
immune complex diseases	immunodeficiency due to defect in cd3-zeta	lymphoma, t-cell, cutaneous
food hypersensitivity	granulomatous disease, chronic, autosomal recessive, cytochrome b-positive, type ii	lymphoma, t-cell
complement component 8 deficiency, type ii	leukemia, t-cell	lymphoma, non-hodgkin
angioedemas, hereditary	interleukin 2 receptor, alpha, deficiency of	job syndrome
ectodermal dysplasia, anhidrotic, with immunodeficiency, osteopetrosis, and lymphedema	granuloma, respiratory tract	sarcoidosis, early-onset
addison disease	invasive pneumococcal disease, recurrent isolated, 1	wolfram syndrome
drug eruptions	glomerulonephritis, membranous	uveomeningoencephalitic syndrome
complement component 2 deficiency	drug hypersensitivity	respiratory hypersensitivity
acquired immunodeficiency syndrome	immune dysfunction with t-cell inactivation due to calcium entry defect 2	lymphoma, large-cell, anaplastic
agammaglobulinemia	complement component 6 deficiency	leukocyte-adhesion deficiency syndrome
agammaglobulinemia 4, autosomal recessive	autoimmune polyendocrinopathy syndrome, type 1	hiv seropositivity
granuloma, respiratory tract	hashimoto disease	respiratory hypersensitivity
dysautonomia, familial	ectodermal dysplasia, hypohidrotic, with immune deficiency	sarcoidosis
immunodysregulation, polyendocrinopathy, and enteropathy, x-linked	lymphoproliferative syndrome, ebv-associated, autosomal, 1	wolcott-rallison syndrome
granulomatous disease, chronic, x-linked	hereditary sensory and autonomic neuropathies	ige responsiveness, atopic
combined cellular and humoral immune defects with granulomas	giant lymph node hyperplasia	reticular dysgenesis
lymphoma, t-cell, peripheral	lymphopenia	precursor t-cell lymphoblastic leukemia-lymphoma
bare lymphocyte syndrome 2	complement component 4, partial deficiency of	thyroiditis, autoimmune
complement component 7 deficiency	leukemia, lymphocytic, chronic, b-cell	purpura, schoenlein-henoch
iga deficiency	immunodeficiency-centromeric instability-facial anomalies syndrome 1	leukemia-lymphoma, adult t-cell
autoimmune lymphoproliferative syndrome	autoimmune polyendocrinopathy syndrome, type 1	wolcott-rallison syndrome
dermatitis, atopic, 2	glomerulonephritis, membranous	hereditary sensory and autonomic neuropathies
leukemia, t-cell	neuropathy, hereditary sensory and autonomic, type iia	whim syndrome
complement component 6 deficiency	diabetes mellitus, insulin-dependent, 5	hiv infections
immune dysfunction with t-cell inactivation due to calcium entry defect 1	mevalonate kinase deficiency	rheumatoid arthritis, systemic juvenile
diabetes mellitus, type 1	drug eruptions	lymphoma, t-cell, cutaneous
glomerulonephritis, membranous	lupus nephritis	neuropathy, hereditary sensory and autonomic, type ia
immunodysregulation, polyendocrinopathy, and enteropathy, x-linked	neuropathy, hereditary sensory and autonomic, type iia	wolcott-rallison syndrome
lupus erythematosus, systemic	peanut hypersensitivity	sarcoidosis
granulomatous disease, chronic, autosomal recessive, cytochrome b-positive, type i	neuropathy, hereditary sensory and autonomic, type ic	pemphigus
aicardi-goutieres syndrome	complement component 6 deficiency	noonan syndrome-like disorder with loose anagen hair
acquired immunodeficiency syndrome	dermatitis, atopic, 1	immune dysfunction with t-cell inactivation due to calcium entry defect 1
ataxia telangiectasia	granulomatous disease, chronic, autosomal recessive, cytochrome b-negative	lymphoproliferative disorders
hepatitis, autoimmune	leukemia-lymphoma, adult t-cell	thyroiditis, autoimmune
hodgkin disease	hyper-ige recurrent infection syndrome, autosomal dominant	myasthenia gravis
immunoblastic lymphadenopathy	multiple myeloma	reticular dysgenesis
arthritis, rheumatoid	drug hypersensitivity	familial cold autoinflammatory syndrome 1
angioedema	rheumatoid arthritis, systemic juvenile	schimke immunoosseous dysplasia
alpha/beta t-cell lymphopenia with gamma/delta t-cell expansion, severe cytomegalovirus infection, a	asthma-related traits, susceptibility to, 5	ectodermal dysplasia, anhidrotic, with immunodeficiency, osteopetrosis, and lymphedema
granulomatous disease, chronic, autosomal recessive, cytochrome b-positive, type i	hypogammaglobulinemia and isolated growth hormone deficiency, x-linked	precursor cell lymphoblastic leukemia-lymphoma
granuloma, plasma cell	neuropathy, hereditary sensory and autonomic, type ia	schimke immunoosseous dysplasia
aids-related kaposi sarcoma	dermatitis, atopic, 4	leukemia, lymphoid
dysautonomia, familial	graves disease	leukemia, lymphocytic, chronic, b-cell
hiv infections	precursor b-cell lymphoblastic leukemia-lymphoma	sarcoidosis, early-onset
lymphoma, b-cell	riddle syndrome	severe combined immunodeficiency, autosomal recessive, t cell-negative, b cell-negative, nk cell-pos
complement component 7 deficiency	irak4 deficiency	severe combined immunodeficiency, autosomal recessive, t cell-negative, b cell-positive, nk cell-neg
complement component 6 deficiency	neutrophil immunodeficiency syndrome	x-linked combined immunodeficiency diseases
eosinophilic esophagitis	granulomatous disease, chronic, autosomal recessive, cytochrome b-positive, type ii	lymphangioleiomyomatosis
angioedemas, hereditary	burkitt lymphoma	immunoblastic lymphadenopathy
hereditary angioedema types i and ii	neuropathy, hereditary sensory and autonomic, type iia	reticular dysgenesis
diabetes mellitus, insulin-dependent, 5	hyper-igm immunodeficiency syndrome	lymphangioleiomyomatosis
autoimmune lymphoproliferative syndrome	kernicterus	lymphangioleiomyomatosis
arthritis, juvenile	chediak-higashi syndrome	drug hypersensitivity
alpha/beta t-cell lymphopenia with gamma/delta t-cell expansion, severe cytomegalovirus infection, a	angioedema	chediak-higashi syndrome
complement component 5 deficiency	diffuse cerebral sclerosis of schilder	graves disease
bare lymphocyte syndrome, type i	encephalomyelitis, autoimmune, experimental	graves ophthalmopathy
diabetes mellitus, insulin-dependent, 22	hiv infections	lig4 syndrome
glomerulonephritis, iga	multiple sclerosis, relapsing-remitting	tyrosine kinase 2 deficiency
chediak-higashi syndrome	dermatitis, allergic contact	multiple sclerosis
arthritis, rheumatoid	dermatitis, atopic, 4	hiv seropositivity
agammaglobulinemia 4, autosomal recessive	hypersensitivity	kernicterus
complement component 7 deficiency	graves disease	kernicterus
acquired immunodeficiency syndrome	bruton type agammaglobulinemia	griscelli syndrome type 2
granulomatous disease, chronic	hereditary angioedema types i and ii	lymphoma, large-cell, anaplastic
alveolitis, extrinsic allergic	diabetes mellitus, type 1	familial cold autoinflammatory syndrome 1
complement component 7 deficiency	food hypersensitivity	lupus nephritis
ataxia telangiectasia	lymphoma, t-cell, peripheral	spondyloenchondrodysplasia
acquired immunodeficiency syndrome	aicardi-goutieres syndrome 5	granuloma, plasma cell
agammaglobulinemia 4, autosomal recessive	anaphylaxis	hepatitis, autoimmune
diabetes mellitus, insulin-dependent, 20	granuloma, foreign-body	precursor cell lymphoblastic leukemia-lymphoma
dermatitis, atopic, 2	diabetes mellitus, type 1	precursor b-cell lymphoblastic leukemia-lymphoma
granuloma, respiratory tract	multiple sclerosis	spondyloenchondrodysplasia
glomerulonephritis, membranoproliferative	immunodysregulation, polyendocrinopathy, and enteropathy, x-linked	purpura, schoenlein-henoch
acquired immunodeficiency syndrome	cd8 deficiency, familial	complement component 7 deficiency
hereditary angioedema type iii	lymphoma, b-cell	rheumatoid arthritis, systemic juvenile
interleukin 2 receptor, alpha, deficiency of	stevens-johnson syndrome	wiskott-aldrich syndrome
complement component 5 deficiency	glomerulonephritis, membranoproliferative	whim syndrome
eosinophilic esophagitis	multiple sclerosis, relapsing-remitting	rhinitis, allergic, perennial
agammaglobulinemia 6, autosomal recessive	immunodeficiency due to defect in mapbp-interacting protein	purpura, schoenlein-henoch
autoimmune lymphoproliferative syndrome	hereditary angioedema type iii	muckle-wells syndrome
asthma-related traits, susceptibility to, 5	ectodermal dysplasia, hypohidrotic, with immune deficiency	hereditary sensory and autonomic neuropathies
agammaglobulinemia 4, autosomal recessive	alpha/beta t-cell lymphopenia with gamma/delta t-cell expansion, severe cytomegalovirus infection, a	leukocyte-adhesion deficiency syndrome
alpha/beta t-cell lymphopenia with gamma/delta t-cell expansion, severe cytomegalovirus infection, a	leukemia-lymphoma, adult t-cell	lymphoma, large-cell, anaplastic
diabetes mellitus, insulin-dependent, 12	granulomatous disease, chronic, autosomal recessive, cytochrome b-positive, type i	immunoblastic lymphadenopathy
anaphylaxis	dermatitis, allergic contact	pemphigoid, bullous
diabetes mellitus, insulin-dependent, 19	hashimoto disease	severe combined immunodeficiency with sensitivity to ionizing radiation
complement component 8 deficiency, type ii	glomerulonephritis, iga	interleukin 2 receptor, alpha, deficiency of
hypersensitivity	polyendocrinopathies, autoimmune	wolcott-rallison syndrome
pemphigus	rheumatoid arthritis, systemic juvenile	spondyloenchondrodysplasia
lupus erythematosus, systemic	tyrosine kinase 2 deficiency	x-linked combined immunodeficiency diseases
encephalomyelitis, autoimmune, experimental	immunologic deficiency syndromes	sarcoidosis
complement component 4, partial deficiency of	serum sickness	wolfram syndrome
asthma, aspirin-induced	graves ophthalmopathy	hiv infections
drug hypersensitivity	food hypersensitivity	reticular dysgenesis
hypogammaglobulinemia and isolated growth hormone deficiency, x-linked	leukemia, t-cell	precursor t-cell lymphoblastic leukemia-lymphoma
graft vs host disease	lymphoma, mantle-cell	myd88 deficiency
eosinophilic esophagitis	lymphoma, t-cell, cutaneous	osteopetrosis, autosomal recessive 7
hashimoto disease	precursor t-cell lymphoblastic leukemia-lymphoma	spondyloenchondrodysplasia
hyper-ige recurrent infection syndrome, autosomal dominant	pemphigus	tyrosine kinase 2 deficiency
agammaglobulinemia	early-onset ataxia with oculomotor apraxia and hypoalbuminemia	lymphoma, large b-cell, diffuse
polyendocrinopathies, autoimmune	urticaria	uveomeningoencephalitic syndrome
griscelli syndrome type 2	lymphoma, large-cell, anaplastic	uveomeningoencephalitic syndrome
diabetes mellitus, type 1	lymphopenia	schimke immunoosseous dysplasia
bare lymphocyte syndrome 2	hiv-associated lipodystrophy syndrome	purpura, thrombocytopenic, idiopathic
ectodermal dysplasia, anhidrotic, with immunodeficiency, osteopetrosis, and lymphedema	granuloma, foreign-body	stevens-johnson syndrome
complement component 7 deficiency	respiratory hypersensitivity	severe combined immunodeficiency
arthritis, rheumatoid	leukemia, t-cell	lymphoma, t-cell, cutaneous
familial cold autoinflammatory syndrome 1	immunologic deficiency syndromes	uveomeningoencephalitic syndrome
lymphoma, follicular	noonan syndrome-like disorder with loose anagen hair	purpura, schoenlein-henoch
agammaglobulinemia	diabetes mellitus, insulin-dependent, 20	encephalomyelitis, autoimmune, experimental
lymphangioleiomyomatosis	multiple sclerosis, relapsing-remitting	neuromyelitis optica
acquired angioedema	complement component 2 deficiency	hyper-igm immunodeficiency syndrome, type 1
complement component 2 deficiency	complement component 4, partial deficiency of	sarcoidosis, early-onset
pemphigus	purpura, thrombocytopenic, idiopathic	whim syndrome
bare lymphocyte syndrome 2	leukemia-lymphoma, adult t-cell	t cell immunodeficiency primary
ectodermal dysplasia, anhidrotic, with immunodeficiency, osteopetrosis, and lymphedema	lymphoma, t-cell	muckle-wells syndrome
acquired immunodeficiency syndrome	complement component 5 deficiency	tyrosine kinase 2 deficiency
alpha/beta t-cell lymphopenia with gamma/delta t-cell expansion, severe cytomegalovirus infection, a	hereditary sensory and autonomic neuropathies	multiple myeloma
bare lymphocyte syndrome 2	common variable immunodeficiency	diabetes mellitus, insulin-dependent, 19
encephalopathy, acute, infection-induced, susceptibility to, 3	hepatic venoocclusive disease with immunodeficiency	irak4 deficiency
diabetes mellitus, insulin-dependent, 20	lymphoma	rhinitis, allergic, perennial
hiv wasting syndrome	lymphoma, large-cell, anaplastic	thyrotoxic periodic paralysis, susceptibility to, 1
granuloma, respiratory tract	lymphoma, t-cell, cutaneous	reticuloendotheliosis, familial, with eosinophilia
diabetes mellitus, type 1	drug hypersensitivity	whim syndrome
cd8 deficiency, familial	glomerulonephritis, membranous	leukemia, lymphoid
purpura, thrombocytopenic, idiopathic	sarcoidosis	severe combined immunodeficiency with microcephaly, growth retardation, and sensitivity to ionizing
ectodermal dysplasia, hypohidrotic, with immune deficiency	hyper-igm immunodeficiency syndrome, type 1	t-lymphocytopenia
complement component c1r/c1s deficiency	invasive pneumococcal disease, recurrent isolated, 1	irak4 deficiency
burkitt lymphoma	immunoglobulin a deficiency 2	severe combined immunodeficiency with sensitivity to ionizing radiation
band-like calcification with simplified gyration and polymicrogyria	dysautonomia, familial	rhinitis, allergic, perennial
agammaglobulinemia	autoimmune lymphoproliferative syndrome	glomerulopathy with fibronectin deposits
chediak-higashi syndrome	pemphigus	sjogren's syndrome
hypogammaglobulinemia and isolated growth hormone deficiency, x-linked	lupus nephritis	myasthenia gravis
encephalopathy, acute, infection-induced, susceptibility to, 3	leukemia, hairy cell	thyroiditis, autoimmune
autoimmune lymphoproliferative syndrome, type iia	hiv wasting syndrome	lupus erythematosus, systemic
acquired immunodeficiency syndrome	autoimmune disease, susceptibility to, 1	immunodysregulation, polyendocrinopathy, and enteropathy, x-linked
anaphylaxis	asthma, aspirin-induced	diabetes mellitus, insulin-dependent, 20
bruton type agammaglobulinemia	hypersensitivity	lymphopenia
immune dysfunction with t-cell inactivation due to calcium entry defect 2	immunodeficiency-centromeric instability-facial anomalies syndrome 1	leukocyte adhesion deficiency, type iii
diabetes mellitus, type 1	glomerulonephritis, membranoproliferative	granulomatous disease, chronic, x-linked
asthma, aspirin-induced	granulomatous disease, chronic, autosomal recessive, cytochrome b-negative	leukemia, lymphoid
alveolitis, extrinsic allergic	immunoglobulin a deficiency 2	thyrotoxic periodic paralysis, susceptibility to, 1
noonan syndrome-like disorder with loose anagen hair	serum sickness	severe combined immunodeficiency, autosomal recessive, t cell-negative, b cell-negative, nk cell-pos
aids-related opportunistic infections	hypogammaglobulinemia and isolated growth hormone deficiency, x-linked	neutrophil immunodeficiency syndrome
job syndrome	myd88 deficiency	peanut hypersensitivity
eosinophilic esophagitis	serum sickness	tyrosine kinase 2 deficiency
bruton type agammaglobulinemia	hiv seropositivity	hyper-ige recurrent infection syndrome, autosomal dominant
ataxia telangiectasia	diabetes mellitus, insulin-dependent, 20	noonan syndrome-like disorder with loose anagen hair
giant lymph node hyperplasia	immunodeficiency due to defect in cd3-zeta	leukocyte adhesion deficiency, type iii
common variable immunodeficiency	graft vs host disease	hiv infections
complement component 5 deficiency	familial cold autoinflammatory syndrome 1	stevens-johnson syndrome
diabetes mellitus, insulin-dependent, 22	glomerulonephritis, membranous	lymphoma, t-cell
hypogammaglobulinemia and isolated growth hormone deficiency, x-linked	serum sickness	severe combined immunodeficiency due to adenosine deaminase deficiency
immunodeficiency due to defect in cd3-zeta	irak4 deficiency	lymphoma, t-cell, cutaneous
bare lymphocyte syndrome 2	severe combined immunodeficiency, autosomal recessive, t cell-negative, b cell-positive, nk cell-pos	stevens-johnson syndrome
immune dysfunction with t-cell inactivation due to calcium entry defect 2	job syndrome	tn syndrome
ataxia telangiectasia	eosinophilic esophagitis	pemphigus
hepatitis, autoimmune	lymphoproliferative disorders	neuropathy, hereditary sensory and autonomic, type iia
complement component c1r/c1s deficiency	hyper-ige recurrent infection syndrome, autosomal dominant	iga deficiency
alveolitis, extrinsic allergic	complement component 5 deficiency	serum sickness
diffuse cerebral sclerosis of schilder	respiratory hypersensitivity	severe combined immunodeficiency, autosomal recessive, t cell-negative, b cell-positive, nk cell-neg
bruton type agammaglobulinemia	diabetes mellitus, insulin-dependent, 10	immunoglobulin a deficiency 2
cd8 deficiency, familial	common variable immunodeficiency	urticaria
graft vs host disease	hiv-associated lipodystrophy syndrome	lymphoma, b-cell
addison disease	neuropathy, hereditary sensory and autonomic, type ia	severe combined immunodeficiency, autosomal recessive, t cell-negative, b cell-positive, nk cell-neg
aicardi-goutieres syndrome 5	ectodermal dysplasia, anhidrotic, with t-cell immunodeficiency, autosomal dominant	purpura, schoenlein-henoch
complement component 7 deficiency	immune complex diseases	sjogren's syndrome
asthma-related traits, susceptibility to, 5	glomerulopathy with fibronectin deposits	rheumatoid arthritis, systemic juvenile
complement component 7 deficiency	granulomatous disease, chronic, autosomal recessive, cytochrome b-positive, type i	hyper-igm immunodeficiency syndrome
bare lymphocyte syndrome, type i	tyrosine kinase 2 deficiency	vitiligo-associated multiple autoimmune disease susceptibility 1
dermatitis, allergic contact	glomerulonephritis, iga	hereditary sensory and autonomic neuropathies
immunodeficiency due to defect in cd3-zeta	lymphoma	myasthenia gravis
granulomatous disease, chronic, autosomal recessive, cytochrome b-positive, type ii	lymphangioleiomyomatosis	masp2 deficiency
hyper-igm immunodeficiency syndrome, type 1	lupus nephritis	severe combined immunodeficiency with microcephaly, growth retardation, and sensitivity to ionizing
autoimmune polyendocrinopathy syndrome, type 1	diabetes mellitus, insulin-dependent, 20	interleukin 2 receptor, alpha, deficiency of
glomerulonephritis, iga	neuromyelitis optica	wolfram syndrome
combined cellular and humoral immune defects with granulomas	encephalopathy, acute, infection-induced, susceptibility to, 3	reticuloendotheliosis, familial, with eosinophilia
ectodermal dysplasia, hypohidrotic, with immune deficiency	pemphigoid, bullous	severe combined immunodeficiency, autosomal recessive, t cell-negative, b cell-positive, nk cell-neg
acquired angioedema	agammaglobulinemia 4, autosomal recessive	noonan syndrome-like disorder with loose anagen hair
band-like calcification with simplified gyration and polymicrogyria	ectodermal dysplasia, anhidrotic, with immunodeficiency, osteopetrosis, and lymphedema	precursor t-cell lymphoblastic leukemia-lymphoma
early-onset ataxia with oculomotor apraxia and hypoalbuminemia	invasive pneumococcal disease, recurrent isolated, 2	lymphopenia
ectodermal dysplasia, hypohidrotic, with immune deficiency	interleukin 2 receptor, alpha, deficiency of	neuropathy, hereditary sensory and autonomic, type iia
burkitt lymphoma	leukemia, t-cell	sarcoidosis, early-onset
autoimmune lymphoproliferative syndrome	immunodeficiency due to defect in cd3-zeta	pemphigus
band-like calcification with simplified gyration and polymicrogyria	graft vs host disease	immunoblastic lymphadenopathy
asthma	multiple myeloma	t cell immunodeficiency primary
hereditary sensory and autonomic neuropathies	hypogammaglobulinemia and isolated growth hormone deficiency, x-linked	reticular dysgenesis
drug eruptions	food hypersensitivity	granulomatous disease, chronic, x-linked
dermatitis, atopic, 1	diabetes mellitus, insulin-dependent, 2	peanut hypersensitivity
glomerulonephritis, iga	granulomatous disease, chronic, x-linked	rhinitis, allergic, perennial
autoimmune lymphoproliferative syndrome	multiple myeloma	precursor cell lymphoblastic leukemia-lymphoma
autoimmune disease, susceptibility to, 1	granuloma, respiratory tract	hypersensitivity
granuloma, plasma cell	hiv infections	stevens-johnson syndrome
combined cellular and humoral immune defects with granulomas	hypersensitivity	lymphangioleiomyomatosis
interleukin 2 receptor, alpha, deficiency of	lymphoproliferative disorders	severe combined immunodeficiency
invasive pneumococcal disease, recurrent isolated, 2	schimke immunoosseous dysplasia	wiskott-aldrich syndrome
angioedema	noonan syndrome-like disorder with or without juvenile myelomonocytic leukemia	whim syndrome
autoimmune lymphoproliferative syndrome	hereditary angioedema type iii	multiple myeloma
ectodermal dysplasia, hypohidrotic, with immune deficiency	hashimoto disease	irak4 deficiency
hypogammaglobulinemia and isolated growth hormone deficiency, x-linked	lig4 syndrome	neuropathy, hereditary sensory and autonomic, type iia
asthma-related traits, susceptibility to, 5	masp2 deficiency	multiple myeloma
ectodermal dysplasia, anhidrotic, with t-cell immunodeficiency, autosomal dominant	ectodermal dysplasia, hypohidrotic, with immune deficiency	sarcoidosis
agammaglobulinemia 6, autosomal recessive	neuropathy, hereditary sensory and autonomic, type ic	whim syndrome
dermatitis, atopic	familial cold autoinflammatory syndrome 1	granulomatous disease, chronic, autosomal recessive, cytochrome b-positive, type i
diffuse cerebral sclerosis of schilder	hepatic venoocclusive disease with immunodeficiency	hyper-igm immunodeficiency syndrome, type 1
addison disease	cd8 deficiency, familial	multiple sclerosis, relapsing-remitting
granulomatous disease, chronic, x-linked	pemphigoid, bullous	severe combined immunodeficiency due to adenosine deaminase deficiency
bruton type agammaglobulinemia	griscelli syndrome type 2	schimke immunoosseous dysplasia
autoimmune disease, susceptibility to, 1	immunodeficiency due to defect in mapbp-interacting protein	lymphoma, t-cell, cutaneous
diabetes mellitus, insulin-dependent, 10	hereditary angioedema types i and ii	invasive pneumococcal disease, recurrent isolated, 1
complement component 8 deficiency, type i	myd88 deficiency	severe combined immunodeficiency with microcephaly, growth retardation, and sensitivity to ionizing
diabetes mellitus, insulin-dependent, 10	hyper-ige recurrent infection syndrome, autosomal dominant	respiratory hypersensitivity
encephalopathy, acute, infection-induced, susceptibility to, 3	lymphoproliferative syndrome, ebv-associated, autosomal, 1	wolcott-rallison syndrome
arthritis, juvenile	diabetes mellitus, insulin-dependent, 20	lymphoma
ataxia telangiectasia	lymphopenia	urticaria
autoimmune lymphoproliferative syndrome, type iia	eosinophilic esophagitis	reticular dysgenesis
hiv infections	osteopetrosis, autosomal recessive 7	wolcott-rallison syndrome
diabetes mellitus, type 1	hypogammaglobulinemia and isolated growth hormone deficiency, x-linked	lymphoma, large-cell, anaplastic
acquired angioedema	hiv wasting syndrome	lymphoma, large b-cell, diffuse
arthritis, juvenile	lig4 syndrome	t cell immunodeficiency primary
ige responsiveness, atopic	leukocyte adhesion deficiency type 1	lymphoma
diabetes mellitus, insulin-dependent, 2	pemphigus	thyrotoxic periodic paralysis, susceptibility to, 1
dysautonomia, familial	early-onset ataxia with oculomotor apraxia and hypoalbuminemia	serum sickness
agammaglobulinemia 6, autosomal recessive	aids-related opportunistic infections	complement component 8 deficiency, type i
asthma, aspirin-induced	hepatitis, autoimmune	precursor cell lymphoblastic leukemia-lymphoma
anaphylaxis	invasive pneumococcal disease, recurrent isolated, 1	pemphigoid, bullous
lymphoma, follicular	myasthenia gravis	riddle syndrome
autoimmune disease, susceptibility to, 1	early-onset ataxia with oculomotor apraxia and hypoalbuminemia	neuropathy, hereditary sensory and autonomic, type ia
addison disease	immunoglobulin a deficiency 2	thyroiditis, autoimmune
bare lymphocyte syndrome 2	invasive pneumococcal disease, recurrent isolated, 1	lymphoproliferative syndrome, x-linked, 2
graves ophthalmopathy	immunodeficiency due to defect in mapbp-interacting protein	severe combined immunodeficiency, autosomal recessive, t cell-negative, b cell-negative, nk cell-pos
diabetes mellitus, insulin-dependent, 10	ectodermal dysplasia, anhidrotic, with t-cell immunodeficiency, autosomal dominant	severe combined immunodeficiency, autosomal recessive, t cell-negative, b cell-positive, nk cell-pos
asthma	combined cellular and humoral immune defects with granulomas	neuromyelitis optica
combined cellular and humoral immune defects with granulomas	myd88 deficiency	peanut hypersensitivity
diabetes mellitus, insulin-dependent, 20	hiv wasting syndrome	mevalonate kinase deficiency
ataxia telangiectasia	hashimoto disease	spondyloenchondrodysplasia
ectodermal dysplasia, hypohidrotic, with immune deficiency	glomerulonephritis, iga	granulomatous disease, chronic, autosomal recessive, cytochrome b-positive, type i
ectodermal dysplasia, anhidrotic, with t-cell immunodeficiency, autosomal dominant	encephalopathy, acute, infection-induced, susceptibility to, 3	muckle-wells syndrome
diabetes mellitus, insulin-dependent, 20	multiple sclerosis, relapsing-remitting	t-lymphocytopenia
drug eruptions	graft vs host disease	granulomatous disease, chronic, autosomal recessive, cytochrome b-positive, type ii
bruton type agammaglobulinemia	granuloma, plasma cell	granulomatous disease, chronic, autosomal recessive, cytochrome b-negative
complement component 8 deficiency, type i	diffuse cerebral sclerosis of schilder	thyrotoxic periodic paralysis, susceptibility to, 1
immunoglobulin a deficiency 2	tyrosine kinase 2 deficiency	wolfram syndrome
cd8 deficiency, familial	complement component 6 deficiency	invasive pneumococcal disease, recurrent isolated, 1
anaphylaxis	autoimmune lymphoproliferative syndrome, type iia	hiv-associated lipodystrophy syndrome
agammaglobulinemia 6, autosomal recessive	purpura, schoenlein-henoch	severe combined immunodeficiency, autosomal recessive, t cell-negative, b cell-negative, nk cell-pos
aids-related kaposi sarcoma	glomerulonephritis, membranoproliferative	osteopetrosis, autosomal recessive 7
arthritis, rheumatoid	lymphoproliferative syndrome, ebv-associated, autosomal, 1	peanut hypersensitivity
leukemia, hairy cell	lupus nephritis	noonan syndrome-like disorder with loose anagen hair
bruton type agammaglobulinemia	immunodeficiency due to defect in cd3-zeta	sarcoidosis
autoimmune disease, susceptibility to, 1	muckle-wells syndrome	pemphigoid, bullous
giant lymph node hyperplasia	hypersensitivity, immediate	lymphoma, extranodal nk-t-cell
arthritis, juvenile	lymphopenia	noonan syndrome-like disorder with loose anagen hair
invasive pneumococcal disease, recurrent isolated, 2	multiple sclerosis, relapsing-remitting	severe combined immunodeficiency, autosomal recessive, t cell-negative, b cell-positive, nk cell-neg
immunoblastic lymphadenopathy	reticular dysgenesis	stevens-johnson syndrome
hyper-ige recurrent infection syndrome, autosomal dominant	immune dysfunction with t-cell inactivation due to calcium entry defect 1	neuropathy, hereditary sensory and autonomic, type iia
cd8 deficiency, familial	familial cold autoinflammatory syndrome 1	lupus nephritis
dermatitis, atopic, 1	immunoblastic lymphadenopathy	thyrotoxic periodic paralysis, susceptibility to, 1
granulomatous disease, chronic	masp2 deficiency	polyendocrinopathies, autoimmune
complement component c1r/c1s deficiency	food hypersensitivity	muckle-wells syndrome
complement component 4, partial deficiency of	lymphopenia	multiple chemical sensitivity
alveolitis, extrinsic allergic	tn syndrome	wolfram syndrome
graft vs host disease	iga deficiency	noonan syndrome-like disorder with loose anagen hair
aicardi-goutieres syndrome	lymphoma, mantle-cell	masp2 deficiency
hereditary angioedema types i and ii	leukemia, lymphocytic, chronic, b-cell	myasthenia gravis
burkitt lymphoma	hypogammaglobulinemia and isolated growth hormone deficiency, x-linked	sjogren's syndrome
addison disease	complement component 5 deficiency	severe combined immunodeficiency, autosomal recessive, t cell-negative, b cell-negative, nk cell-pos
interleukin 2 receptor, alpha, deficiency of	multiple sclerosis	severe combined immunodeficiency due to adenosine deaminase deficiency
acquired angioedema	ataxia telangiectasia	multiple myeloma
diabetes mellitus, insulin-dependent, 2	leukemia, lymphoid	neuromyelitis optica
hiv infections	immunoglobulin a deficiency 2	lymphoma, extranodal nk-t-cell
agammaglobulinemia 4, autosomal recessive	leukocyte adhesion deficiency type 1	masp2 deficiency
angioedemas, hereditary	lymphoproliferative syndrome, ebv-associated, autosomal, 1	sarcoidosis, early-onset
hereditary sensory and autonomic neuropathies	kernicterus	schimke immunoosseous dysplasia
familial cold autoinflammatory syndrome 1	granuloma, respiratory tract	hereditary angioedema types i and ii
acquired angioedema	complement component 2 deficiency	encephalopathy, acute, infection-induced, susceptibility to, 3
drug eruptions	immunoblastic lymphadenopathy	sjogren's syndrome
diffuse cerebral sclerosis of schilder	urticaria	uveomeningoencephalitic syndrome
combined cellular and humoral immune defects with granulomas	granulomatous disease, chronic, autosomal recessive, cytochrome b-positive, type i	granulomatous disease, chronic, autosomal recessive, cytochrome b-positive, type ii
aids-related kaposi sarcoma	graves disease	severe combined immunodeficiency, autosomal recessive, t cell-negative, b cell-negative, nk cell-pos
early-onset ataxia with oculomotor apraxia and hypoalbuminemia	encephalomyelitis, autoimmune, experimental	multiple chemical sensitivity
hiv-associated lipodystrophy syndrome	interleukin 2 receptor, alpha, deficiency of	irak4 deficiency
burkitt lymphoma	ectodermal dysplasia, anhidrotic, with t-cell immunodeficiency, autosomal dominant	granuloma, foreign-body
combined cellular and humoral immune defects with granulomas	dermatitis, atopic, 2	granuloma, foreign-body
glomerulonephritis, iga	lupus erythematosus, systemic	polyendocrinopathies, autoimmune
anaphylaxis	diffuse cerebral sclerosis of schilder	leukemia, lymphoid
giant lymph node hyperplasia	graves disease	peanut hypersensitivity
addison disease	multiple myeloma	precursor t-cell lymphoblastic leukemia-lymphoma
agammaglobulinemia	dermatitis, atopic, 1	precursor b-cell lymphoblastic leukemia-lymphoma
aicardi-goutieres syndrome	asthma, aspirin-induced	sarcoidosis, early-onset
common variable immunodeficiency	ige responsiveness, atopic	severe combined immunodeficiency
diabetes mellitus, insulin-dependent, 5	giant lymph node hyperplasia	hereditary angioedema type iii
autoimmune disease, susceptibility to, 1	dysautonomia, familial	leukemia, lymphocytic, chronic, b-cell
ectodermal dysplasia, anhidrotic, with immunodeficiency, osteopetrosis, and lymphedema	lymphoma, non-hodgkin	uveomeningoencephalitic syndrome
familial cold autoinflammatory syndrome 1	lymphoproliferative syndrome, ebv-associated, autosomal, 1	respiratory hypersensitivity
acquired immunodeficiency syndrome	food hypersensitivity	giant lymph node hyperplasia
dysautonomia, familial	mevalonate kinase deficiency	purpura, schoenlein-henoch
aicardi-goutieres syndrome 5	graves disease	leukemia, t-cell
diabetes mellitus, insulin-dependent, 10	hashimoto disease	tn syndrome
chediak-higashi syndrome	diffuse cerebral sclerosis of schilder	noonan syndrome-like disorder with loose anagen hair
ectodermal dysplasia, anhidrotic, with t-cell immunodeficiency, autosomal dominant	lymphangioleiomyomatosis	lymphoma, mantle-cell
complement component c1r/c1s deficiency	interleukin 2 receptor, alpha, deficiency of	severe combined immunodeficiency, autosomal recessive, t cell-negative, b cell-positive, nk cell-pos
asthma-related traits, susceptibility to, 5	granulomatous disease, chronic, autosomal recessive, cytochrome b-positive, type i	immunodeficiency without anhidrotic ectodermal dysplasia
lymphoma, b-cell	severe combined immunodeficiency, autosomal recessive, t cell-negative, b cell-negative, nk cell-pos	wolfram syndrome
hiv-associated lipodystrophy syndrome	masp2 deficiency	multiple sclerosis
familial cold autoinflammatory syndrome 1	immunodeficiency-centromeric instability-facial anomalies syndrome 1	invasive pneumococcal disease, recurrent isolated, 1
diabetes mellitus, insulin-dependent, 22	hyper-igm immunodeficiency syndrome	serum sickness
diabetes mellitus, type 1	multiple chemical sensitivity	serum sickness
diabetes mellitus, insulin-dependent, 20	leukemia-lymphoma, adult t-cell	leukocyte-adhesion deficiency syndrome
asthma-related traits, susceptibility to, 7	immunodeficiency-centromeric instability-facial anomalies syndrome 1	neuropathy, hereditary sensory and autonomic, type ic
hepatic venoocclusive disease with immunodeficiency	hiv-associated lipodystrophy syndrome	leukemia, lymphocytic, chronic, b-cell
complement component 2 deficiency	lymphangioleiomyomatosis	lymphoma, large b-cell, diffuse
aids-related kaposi sarcoma	hereditary angioedema type iii	reticular dysgenesis
complement component 8 deficiency, type ii	muckle-wells syndrome	osteopetrosis, autosomal recessive 7
arthritis, juvenile	neuropathy, hereditary sensory and autonomic, type iia	noonan syndrome-like disorder with loose anagen hair
addison disease	riddle syndrome	severe combined immunodeficiency with microcephaly, growth retardation, and sensitivity to ionizing
immunodeficiency without anhidrotic ectodermal dysplasia	leukemia, lymphocytic, chronic, b-cell	severe combined immunodeficiency, autosomal recessive, t cell-negative, b cell-negative, nk cell-pos
complement component 6 deficiency	leukemia-lymphoma, adult t-cell	thyrotoxic periodic paralysis, susceptibility to, 1
eosinophilic esophagitis	lymphoma, large b-cell, diffuse	severe combined immunodeficiency with microcephaly, growth retardation, and sensitivity to ionizing
dermatitis, atopic, 1	hiv-associated lipodystrophy syndrome	lymphoproliferative disorders
kernicterus	lymphoma, large-cell, anaplastic	multiple chemical sensitivity
granuloma, plasma cell	immunodeficiency due to defect in cd3-zeta	neuropathy, hereditary sensory and autonomic, type ic
food hypersensitivity	graves disease	precursor t-cell lymphoblastic leukemia-lymphoma
hiv infections	immunodeficiency due to defect in cd3-zeta	x-linked combined immunodeficiency diseases
hashimoto disease	hyper-igm immunodeficiency syndrome	vitiligo-associated multiple autoimmune disease susceptibility 1
complement component 8 deficiency, type ii	encephalomyelitis, autoimmune, experimental	muckle-wells syndrome
early-onset ataxia with oculomotor apraxia and hypoalbuminemia	immunodeficiency due to defect in cd3-zeta	lymphoma, non-hodgkin
hiv-associated lipodystrophy syndrome	job syndrome	neuropathy, hereditary sensory and autonomic, type iia
acquired angioedema	agammaglobulinemia	autoimmune disease, susceptibility to, 1
bare lymphocyte syndrome 2	immunoglobulin a deficiency 2	leukemia, t-cell
hypersensitivity, immediate	multiple sclerosis	severe combined immunodeficiency, autosomal recessive, t cell-negative, b cell-negative, nk cell-pos
agammaglobulinemia 6, autosomal recessive	diabetes mellitus, insulin-dependent, 12	immune dysfunction with t-cell inactivation due to calcium entry defect 1
chediak-higashi syndrome	complement component c1r/c1s deficiency	lupus erythematosus, systemic
food hypersensitivity	rhinitis, allergic, perennial	wolfram syndrome
glomerulonephritis, membranous	multiple myeloma	rheumatoid arthritis, systemic juvenile
drug hypersensitivity	irak4 deficiency	tn syndrome
autoimmune polyendocrinopathy syndrome, type 1	early-onset ataxia with oculomotor apraxia and hypoalbuminemia	precursor b-cell lymphoblastic leukemia-lymphoma
eosinophilic esophagitis	food hypersensitivity	t cell immunodeficiency primary
immunodeficiency-centromeric instability-facial anomalies syndrome 1	neuropathy, hereditary sensory and autonomic, type ia	purpura, thrombotic thrombocytopenic
granulomatous disease, chronic, autosomal recessive, cytochrome b-positive, type i	muckle-wells syndrome	rhinitis, allergic, perennial
lymphoproliferative disorders	neutrophil immunodeficiency syndrome	severe combined immunodeficiency, autosomal recessive, t cell-negative, b cell-positive, nk cell-pos
band-like calcification with simplified gyration and polymicrogyria	giant lymph node hyperplasia	hypersensitivity, immediate
addison disease	immune complex diseases	immunodeficiency-centromeric instability-facial anomalies syndrome 1
hepatitis, autoimmune	leukemia, t-cell	wolcott-rallison syndrome
granuloma, foreign-body	noonan syndrome-like disorder with or without juvenile myelomonocytic leukemia	purpura, thrombocytopenic, idiopathic
granulomatous disease, chronic, autosomal recessive, cytochrome b-positive, type ii	iga deficiency	lymphoma, extranodal nk-t-cell
eosinophilic esophagitis	lymphoma, extranodal nk-t-cell	urticaria
severe combined immunodeficiency, autosomal recessive, t cell-negative, b cell-positive, nk cell-pos	severe combined immunodeficiency with sensitivity to ionizing radiation	vitiligo-associated multiple autoimmune disease susceptibility 1
hepatitis, autoimmune	neuropathy, hereditary sensory and autonomic, type iia	severe combined immunodeficiency with sensitivity to ionizing radiation
complement component 4, partial deficiency of	reticuloendotheliosis, familial, with eosinophilia	vitiligo-associated multiple autoimmune disease susceptibility 1
autoimmune polyendocrinopathy syndrome, type 1	muckle-wells syndrome	t cell immunodeficiency primary
asthma	drug eruptions	sarcoidosis, early-onset
lymphoma, t-cell	lymphoproliferative syndrome, ebv-associated, autosomal, 1	precursor t-cell lymphoblastic leukemia-lymphoma
hiv-associated lipodystrophy syndrome	immunodysregulation, polyendocrinopathy, and enteropathy, x-linked	lymphoma, mantle-cell
aicardi-goutieres syndrome 5	chediak-higashi syndrome	common variable immunodeficiency
diabetes mellitus, insulin-dependent, 20	lymphoproliferative disorders	uveomeningoencephalitic syndrome
eosinophilic esophagitis	leukemia, lymphocytic, chronic, b-cell	riddle syndrome
immune dysfunction with t-cell inactivation due to calcium entry defect 2	thyroiditis, autoimmune	wolfram syndrome
complement component 6 deficiency	food hypersensitivity	masp2 deficiency
diabetes mellitus, insulin-dependent, 19	glomerulonephritis, membranous	hypersensitivity, immediate
angioedemas, hereditary	immune dysfunction with t-cell inactivation due to calcium entry defect 1	lymphoma, t-cell
angioedemas, hereditary	diabetes mellitus, insulin-dependent, 12	sarcoidosis, early-onset
griscelli syndrome type 2	respiratory hypersensitivity	riddle syndrome
aids-related opportunistic infections	reticular dysgenesis	urticaria
lymphoma, large b-cell, diffuse	peanut hypersensitivity	sarcoidosis
lymphoproliferative syndrome, ebv-associated, autosomal, 1	multiple sclerosis, relapsing-remitting	urticaria
agammaglobulinemia 6, autosomal recessive	neuropathy, hereditary sensory and autonomic, type ia	severe combined immunodeficiency with microcephaly, growth retardation, and sensitivity to ionizing
autoimmune polyendocrinopathy syndrome, type 1	hypogammaglobulinemia and isolated growth hormone deficiency, x-linked	wolcott-rallison syndrome
diabetes mellitus, insulin-dependent, 10	hereditary angioedema types i and ii	hereditary sensory and autonomic neuropathies
complement component 6 deficiency	lymphoproliferative disorders	thyroiditis, autoimmune
aids-related kaposi sarcoma	drug eruptions	hiv seropositivity
alveolitis, extrinsic allergic	immune complex diseases	lymphoma, t-cell
dysautonomia, familial	food hypersensitivity	hereditary angioedema types i and ii
agammaglobulinemia 6, autosomal recessive	leukemia, hairy cell	lymphoma, non-hodgkin
hiv-associated lipodystrophy syndrome	leukocyte adhesion deficiency type 1	severe combined immunodeficiency, autosomal recessive, t cell-negative, b cell-positive, nk cell-pos
complement component 6 deficiency	graft vs host disease	sarcoidosis, early-onset
anaphylaxis	invasive pneumococcal disease, recurrent isolated, 2	uveomeningoencephalitic syndrome
diabetes mellitus, insulin-dependent, 19	lymphoma	myd88 deficiency
dermatitis, atopic, 2	hereditary sensory and autonomic neuropathies	tyrosine kinase 2 deficiency
alveolitis, extrinsic allergic	bruton type agammaglobulinemia	eosinophilic esophagitis
leukemia, hairy cell	neuromyelitis optica	pemphigoid, bullous
complement component 7 deficiency	ectodermal dysplasia, anhidrotic, with immunodeficiency, osteopetrosis, and lymphedema	osteopetrosis, autosomal recessive 7
band-like calcification with simplified gyration and polymicrogyria	hashimoto disease	leukemia, lymphocytic, chronic, b-cell
autoimmune lymphoproliferative syndrome, type iia	dermatitis, atopic, 1	immune complex diseases
arthritis, juvenile	invasive pneumococcal disease, recurrent isolated, 2	lymphoproliferative syndrome, ebv-associated, autosomal, 1
angioedema	hodgkin disease	multiple myeloma
hyper-ige recurrent infection syndrome, autosomal dominant	neutrophil immunodeficiency syndrome	sjogren's syndrome
addison disease	hiv infections	lymphoma, mantle-cell
encephalopathy, acute, infection-induced, susceptibility to, 3	lig4 syndrome	polyendocrinopathies, autoimmune
aicardi-goutieres syndrome 5	granuloma, respiratory tract	multiple sclerosis
anaphylaxis	diabetes mellitus, insulin-dependent, 22	drug eruptions
aids-related opportunistic infections	ectodermal dysplasia, hypohidrotic, with immune deficiency	lymphoma, large b-cell, diffuse
job syndrome	multiple sclerosis, relapsing-remitting	riddle syndrome
arthritis, juvenile	irak4 deficiency	myd88 deficiency
alpha/beta t-cell lymphopenia with gamma/delta t-cell expansion, severe cytomegalovirus infection, a	dermatitis, atopic	graft vs host disease
immunodeficiency without anhidrotic ectodermal dysplasia	multiple sclerosis, relapsing-remitting	neuropathy, hereditary sensory and autonomic, type iia
bare lymphocyte syndrome 2	diabetes mellitus, insulin-dependent, 20	lymphoma, non-hodgkin
ataxia telangiectasia	hereditary sensory and autonomic neuropathies	rheumatoid arthritis, systemic juvenile
early-onset ataxia with oculomotor apraxia and hypoalbuminemia	immunoblastic lymphadenopathy	schimke immunoosseous dysplasia
immunodeficiency due to defect in mapbp-interacting protein	invasive pneumococcal disease, recurrent isolated, 2	job syndrome
hashimoto disease	hypersensitivity	immunodeficiency-centromeric instability-facial anomalies syndrome 1
drug eruptions	giant lymph node hyperplasia	hereditary angioedema types i and ii
granulomatous disease, chronic, x-linked	iga deficiency	severe combined immunodeficiency, autosomal recessive, t cell-negative, b cell-negative, nk cell-pos
asthma	burkitt lymphoma	leukocyte adhesion deficiency type 1
complement component 8 deficiency, type ii	complement component c1r/c1s deficiency	immunodeficiency due to defect in mapbp-interacting protein
diabetes mellitus, insulin-dependent, 22	lymphoproliferative syndrome, ebv-associated, autosomal, 1	neuropathy, hereditary sensory and autonomic, type ia
alpha/beta t-cell lymphopenia with gamma/delta t-cell expansion, severe cytomegalovirus infection, a	drug hypersensitivity	thyrotoxic periodic paralysis, susceptibility to, 1
dermatitis, atopic, 2	lymphoproliferative syndrome, x-linked, 2	riddle syndrome
granulomatous disease, chronic	neuropathy, hereditary sensory and autonomic, type iia	t-lymphocytopenia
asthma-related traits, susceptibility to, 5	dermatitis, atopic, 2	lupus nephritis
hypogammaglobulinemia and isolated growth hormone deficiency, x-linked	neutrophil immunodeficiency syndrome	peanut hypersensitivity
glomerulonephritis, membranous	lymphangioleiomyomatosis	serum sickness
chediak-higashi syndrome	complement component 7 deficiency	purpura, thrombotic thrombocytopenic
hepatitis, autoimmune	rheumatoid arthritis, systemic juvenile	severe combined immunodeficiency due to adenosine deaminase deficiency
acquired immunodeficiency syndrome	complement component 7 deficiency	hypersensitivity, immediate
dermatitis, atopic	glomerulonephritis, membranous	hiv seropositivity
granulomatous disease, chronic	multiple myeloma	t-lymphocytopenia
immunoblastic lymphadenopathy	lymphopenia	wolcott-rallison syndrome
anaphylaxis	lymphoma	wolfram syndrome
acquired angioedema	granulomatous disease, chronic, autosomal recessive, cytochrome b-positive, type i	multiple chemical sensitivity
immunodeficiency without anhidrotic ectodermal dysplasia	respiratory hypersensitivity	schimke immunoosseous dysplasia
immunodeficiency-centromeric instability-facial anomalies syndrome 1	myasthenia gravis	purpura, thrombotic thrombocytopenic
hyper-ige recurrent infection syndrome, autosomal dominant	lupus erythematosus, systemic	precursor cell lymphoblastic leukemia-lymphoma
hiv infections	invasive pneumococcal disease, recurrent isolated, 1	myd88 deficiency
chediak-higashi syndrome	multiple chemical sensitivity	sjogren's syndrome
combined cellular and humoral immune defects with granulomas	complement component 8 deficiency, type ii	hiv infections
diabetes mellitus, insulin-dependent, 19	hyper-igm immunodeficiency syndrome	mevalonate kinase deficiency
complement component 2 deficiency	immune dysfunction with t-cell inactivation due to calcium entry defect 1	t-lymphocytopenia
dermatitis, atopic, 1	hypersensitivity, delayed	leukemia, lymphocytic, chronic, b-cell
drug hypersensitivity	hiv wasting syndrome	lymphoproliferative disorders
agammaglobulinemia 6, autosomal recessive	interleukin 2 receptor, alpha, deficiency of	osteopetrosis, autosomal recessive 7
immune complex diseases	immune dysfunction with t-cell inactivation due to calcium entry defect 1	multiple sclerosis
glomerulonephritis, iga	lymphoma, large-cell, anaplastic	lymphoproliferative syndrome, ebv-associated, autosomal, 1
autoimmune diseases	chediak-higashi syndrome	riddle syndrome
hiv wasting syndrome	hyper-igm immunodeficiency syndrome	noonan syndrome-like disorder with loose anagen hair
bare lymphocyte syndrome 2	ectodermal dysplasia, anhidrotic, with t-cell immunodeficiency, autosomal dominant	immunodeficiency without anhidrotic ectodermal dysplasia
granuloma, respiratory tract	riddle syndrome	tyrosine kinase 2 deficiency
aicardi-goutieres syndrome 5	ectodermal dysplasia, anhidrotic, with immunodeficiency, osteopetrosis, and lymphedema	hashimoto disease
band-like calcification with simplified gyration and polymicrogyria	lymphoma, non-hodgkin	sarcoidosis
acquired immunodeficiency syndrome	ectodermal dysplasia, anhidrotic, with immunodeficiency, osteopetrosis, and lymphedema	hyper-igm immunodeficiency syndrome
multiple chemical sensitivity	pemphigus	rheumatoid arthritis, systemic juvenile
diabetes mellitus, insulin-dependent, 2	hypersensitivity	immunoblastic lymphadenopathy
addison disease	lymphoma, non-hodgkin	stevens-johnson syndrome
granuloma, plasma cell	immunologic deficiency syndromes	sarcoidosis, early-onset
interleukin 2 receptor, alpha, deficiency of	lymphoma, large-cell, anaplastic	severe combined immunodeficiency, autosomal recessive, t cell-negative, b cell-negative, nk cell-pos
burkitt lymphoma	ectodermal dysplasia, hypohidrotic, with immune deficiency	sarcoidosis
angioedema	leukemia, lymphoid	schimke immunoosseous dysplasia
aicardi-goutieres syndrome	complement component 2 deficiency	whim syndrome
autoimmune lymphoproliferative syndrome	hypersensitivity	leukocyte adhesion deficiency, type iii
noonan syndrome-like disorder with loose anagen hair	polyendocrinopathies, autoimmune	purpura, schoenlein-henoch
burkitt lymphoma	complement component 7 deficiency	hepatitis, autoimmune
complement component c1r/c1s deficiency	mevalonate kinase deficiency	neutrophil immunodeficiency syndrome
drug hypersensitivity	lymphoma, t-cell, cutaneous	pemphigoid, bullous
glomerulonephritis, iga	hereditary angioedema types i and ii	leukemia, lymphoid
giant lymph node hyperplasia	hereditary angioedema types i and ii	lymphopenia
glomerulonephritis, membranous	granuloma, plasma cell	wiskott-aldrich syndrome
dysautonomia, familial	glomerulonephritis, iga	immune complex diseases
asthma-related traits, susceptibility to, 5	neuropathy, hereditary sensory and autonomic, type ia	precursor cell lymphoblastic leukemia-lymphoma
lymphoma, t-cell	neuromyelitis optica	sjogren's syndrome
immunodeficiency due to defect in mapbp-interacting protein	leukemia, lymphoid	neutrophil immunodeficiency syndrome
angioedema	lymphoma, b-cell	thyrotoxic periodic paralysis, susceptibility to, 1
glomerulonephritis, iga	leukemia-lymphoma, adult t-cell	polyendocrinopathies, autoimmune
multiple myeloma	myd88 deficiency	sarcoidosis, early-onset
complement component 4, partial deficiency of	invasive pneumococcal disease, recurrent isolated, 2	severe combined immunodeficiency
myasthenia gravis	rheumatoid arthritis, systemic juvenile	sjogren's syndrome
agammaglobulinemia	graft vs host disease	precursor t-cell lymphoblastic leukemia-lymphoma
aids-related kaposi sarcoma	granulomatous disease, chronic, autosomal recessive, cytochrome b-negative	immune dysfunction with t-cell inactivation due to calcium entry defect 1
immunodeficiency-centromeric instability-facial anomalies syndrome 1	invasive pneumococcal disease, recurrent isolated, 2	uveomeningoencephalitic syndrome
hypersensitivity, immediate	immunodysregulation, polyendocrinopathy, and enteropathy, x-linked	thyrotoxic periodic paralysis, susceptibility to, 1
agammaglobulinemia 4, autosomal recessive	chediak-higashi syndrome	hypersensitivity, immediate
granulomatous disease, chronic, autosomal recessive, cytochrome b-negative	neuromyelitis optica	severe combined immunodeficiency with microcephaly, growth retardation, and sensitivity to ionizing
diabetes mellitus, insulin-dependent, 22	hepatitis, autoimmune	lymphangioleiomyomatosis
angioedemas, hereditary	diabetes mellitus, insulin-dependent, 5	lymphoma, non-hodgkin
acquired immunodeficiency syndrome	complement component 6 deficiency	lupus erythematosus, systemic
agammaglobulinemia 6, autosomal recessive	aicardi-goutieres syndrome	asthma
diabetes mellitus, insulin-dependent, 10	hypogammaglobulinemia and isolated growth hormone deficiency, x-linked	polyendocrinopathies, autoimmune
invasive pneumococcal disease, recurrent isolated, 1	leukemia, hairy cell	osteopetrosis, autosomal recessive 7
autoimmune polyendocrinopathy syndrome, type 1	hypersensitivity	multiple sclerosis
agammaglobulinemia 6, autosomal recessive	hiv wasting syndrome	reticuloendotheliosis, familial, with eosinophilia
immune dysfunction with t-cell inactivation due to calcium entry defect 1	invasive pneumococcal disease, recurrent isolated, 1	leukocyte adhesion deficiency type 1
early-onset ataxia with oculomotor apraxia and hypoalbuminemia	ectodermal dysplasia, hypohidrotic, with immune deficiency	multiple chemical sensitivity
eosinophilic esophagitis	hepatitis, autoimmune	lymphoma, t-cell, cutaneous
autoimmune polyendocrinopathy syndrome, type 1	hodgkin disease	ige responsiveness, atopic
complement component 2 deficiency	graves ophthalmopathy	immunodysregulation, polyendocrinopathy, and enteropathy, x-linked
ige responsiveness, atopic	job syndrome	leukocyte adhesion deficiency, type iii
iga deficiency	interleukin 2 receptor, alpha, deficiency of	myasthenia gravis
glomerulonephritis, membranoproliferative	granulomatous disease, chronic, autosomal recessive, cytochrome b-positive, type ii	leukocyte adhesion deficiency, type iii
alpha/beta t-cell lymphopenia with gamma/delta t-cell expansion, severe cytomegalovirus infection, a	asthma-related traits, susceptibility to, 5	leukemia, t-cell
bare lymphocyte syndrome, type i	immunoblastic lymphadenopathy	leukemia, hairy cell
chediak-higashi syndrome	encephalomyelitis, autoimmune, experimental	hashimoto disease
glomerulonephritis, membranous	masp2 deficiency	severe combined immunodeficiency
bare lymphocyte syndrome, type i	lymphoma, large b-cell, diffuse	wolfram syndrome
leukemia, lymphoid	severe combined immunodeficiency with microcephaly, growth retardation, and sensitivity to ionizing	thyroiditis, autoimmune
food hypersensitivity	hodgkin disease	t-lymphocytopenia
granuloma, foreign-body	muckle-wells syndrome	multiple chemical sensitivity
graft vs host disease	polyendocrinopathies, autoimmune	severe combined immunodeficiency with sensitivity to ionizing radiation
burkitt lymphoma	cd8 deficiency, familial	lymphoma, large-cell, anaplastic
familial cold autoinflammatory syndrome 1	lupus nephritis	schimke immunoosseous dysplasia
bare lymphocyte syndrome, type i	complement component 5 deficiency	rheumatoid arthritis, systemic juvenile
graft vs host disease	hereditary sensory and autonomic neuropathies	lymphoma, extranodal nk-t-cell
chediak-higashi syndrome	dermatitis, atopic, 4	lymphoma, t-cell, peripheral
diffuse cerebral sclerosis of schilder	irak4 deficiency	reticuloendotheliosis, familial, with eosinophilia
anaphylaxis	food hypersensitivity	glomerulonephritis, membranous
acquired angioedema	multiple myeloma	precursor t-cell lymphoblastic leukemia-lymphoma
cd8 deficiency, familial	spondyloenchondrodysplasia	wolfram syndrome
multiple chemical sensitivity	t cell immunodeficiency primary	wiskott-aldrich syndrome
combined cellular and humoral immune defects with granulomas	common variable immunodeficiency	wolfram syndrome
hodgkin disease	lymphoma, follicular	tyrosine kinase 2 deficiency
complement component 6 deficiency	food hypersensitivity	lymphoma, t-cell
arthritis, rheumatoid	leukocyte-adhesion deficiency syndrome	severe combined immunodeficiency with microcephaly, growth retardation, and sensitivity to ionizing
hepatitis, autoimmune	irak4 deficiency	tn syndrome
aicardi-goutieres syndrome	granulomatous disease, chronic	sjogren's syndrome
graves disease	precursor cell lymphoblastic leukemia-lymphoma	purpura, thrombotic thrombocytopenic
encephalomyelitis, autoimmune, experimental	immunoglobulin a deficiency 2	tn syndrome
glomerulonephritis, iga	hypersensitivity, delayed	leukemia-lymphoma, adult t-cell
addison disease	irak4 deficiency	riddle syndrome
cd8 deficiency, familial	lymphoma, mantle-cell	sarcoidosis
complement component 2 deficiency	neuropathy, hereditary sensory and autonomic, type ic	precursor cell lymphoblastic leukemia-lymphoma
dermatitis, allergic contact	leukemia, t-cell	rhinitis, allergic, perennial
addison disease	multiple myeloma	respiratory hypersensitivity
arthritis, rheumatoid	glomerulonephritis, iga	severe combined immunodeficiency
dermatitis, atopic, 1	lymphoma, follicular	reticular dysgenesis
complement component 8 deficiency, type i	job syndrome	kernicterus
autoimmune diseases	hypogammaglobulinemia and isolated growth hormone deficiency, x-linked	severe combined immunodeficiency, autosomal recessive, t cell-negative, b cell-negative, nk cell-pos
dermatitis, atopic, 1	leukocyte-adhesion deficiency syndrome	urticaria
griscelli syndrome type 2	pemphigoid, bullous	sjogren's syndrome
arthritis, rheumatoid	asthma, aspirin-induced	familial cold autoinflammatory syndrome 1
aids-related kaposi sarcoma	asthma-related traits, susceptibility to, 5	early-onset ataxia with oculomotor apraxia and hypoalbuminemia
dermatitis, atopic, 4	mevalonate kinase deficiency	t-lymphocytopenia
alveolitis, extrinsic allergic	autoimmune polyendocrinopathy syndrome, type 1	granulomatous disease, chronic
bare lymphocyte syndrome, type i	burkitt lymphoma	serum sickness
familial cold autoinflammatory syndrome 1	griscelli syndrome type 2	lymphopenia
encephalopathy, acute, infection-induced, susceptibility to, 3	precursor b-cell lymphoblastic leukemia-lymphoma	severe combined immunodeficiency
leukemia-lymphoma, adult t-cell	lupus nephritis	lymphoma, t-cell, peripheral
diabetes mellitus, insulin-dependent, 12	granulomatous disease, chronic, x-linked	tn syndrome
dermatitis, atopic, 1	diabetes mellitus, insulin-dependent, 19	lymphoma, t-cell, peripheral
cd8 deficiency, familial	food hypersensitivity	graves ophthalmopathy
complement component 4, partial deficiency of	glomerulonephritis, membranous	granuloma, foreign-body
autoimmune polyendocrinopathy syndrome, type 1	noonan syndrome-like disorder with or without juvenile myelomonocytic leukemia	precursor b-cell lymphoblastic leukemia-lymphoma
iga deficiency	immunodeficiency-centromeric instability-facial anomalies syndrome 1	purpura, thrombotic thrombocytopenic
bare lymphocyte syndrome, type i	granulomatous disease, chronic, autosomal recessive, cytochrome b-negative	immunodeficiency due to defect in cd3-zeta
aicardi-goutieres syndrome 5	lymphopenia	sarcoidosis, early-onset
hereditary sensory and autonomic neuropathies	immunodysregulation, polyendocrinopathy, and enteropathy, x-linked	wiskott-aldrich syndrome
addison disease	graft vs host disease	lymphoma, extranodal nk-t-cell
alveolitis, extrinsic allergic	cd8 deficiency, familial	immunodeficiency due to defect in mapbp-interacting protein
leukemia, t-cell	lig4 syndrome	reticuloendotheliosis, familial, with eosinophilia
dysautonomia, familial	lymphoproliferative disorders	uveomeningoencephalitic syndrome
dermatitis, allergic contact	hiv seropositivity	vitiligo-associated multiple autoimmune disease susceptibility 1
complement component 8 deficiency, type ii	invasive pneumococcal disease, recurrent isolated, 2	neutrophil immunodeficiency syndrome
agammaglobulinemia 6, autosomal recessive	encephalopathy, acute, infection-induced, susceptibility to, 3	hiv-associated lipodystrophy syndrome
hereditary sensory and autonomic neuropathies	invasive pneumococcal disease, recurrent isolated, 1	stevens-johnson syndrome
diabetes mellitus, insulin-dependent, 5	diffuse cerebral sclerosis of schilder	lymphoma, extranodal nk-t-cell
dermatitis, atopic	drug hypersensitivity	glomerulonephritis, membranoproliferative
immunodysregulation, polyendocrinopathy, and enteropathy, x-linked	sarcoidosis	whim syndrome
hiv-associated lipodystrophy syndrome	immunodeficiency without anhidrotic ectodermal dysplasia	leukemia, hairy cell
combined cellular and humoral immune defects with granulomas	diabetes mellitus, insulin-dependent, 2	granulomatous disease, chronic, autosomal recessive, cytochrome b-positive, type i
dermatitis, atopic, 1	immune dysfunction with t-cell inactivation due to calcium entry defect 1	severe combined immunodeficiency, autosomal recessive, t cell-negative, b cell-positive, nk cell-pos
agammaglobulinemia	arthritis, juvenile	hashimoto disease
diabetes mellitus, insulin-dependent, 19	glomerulonephritis, membranous	immune dysfunction with t-cell inactivation due to calcium entry defect 1
eosinophilic esophagitis	graft vs host disease	serum sickness
alveolitis, extrinsic allergic	complement component 8 deficiency, type ii	severe combined immunodeficiency due to adenosine deaminase deficiency
autoimmune diseases	iga deficiency	lymphoma, large-cell, anaplastic
encephalopathy, acute, infection-induced, susceptibility to, 3	giant lymph node hyperplasia	spondyloenchondrodysplasia
complement component 4, partial deficiency of	complement component 6 deficiency	ectodermal dysplasia, hypohidrotic, with immune deficiency
dermatitis, atopic	lymphoproliferative syndrome, x-linked, 2	multiple sclerosis
hodgkin disease	kernicterus	leukocyte-adhesion deficiency syndrome
lymphoma, b-cell	riddle syndrome	severe combined immunodeficiency
glomerulonephritis, membranoproliferative	hepatitis, autoimmune	job syndrome
hiv seropositivity	precursor cell lymphoblastic leukemia-lymphoma	severe combined immunodeficiency, autosomal recessive, t cell-negative, b cell-positive, nk cell-pos
complement component c1r/c1s deficiency	immunodeficiency due to defect in mapbp-interacting protein	leukemia, lymphocytic, chronic, b-cell
diabetes mellitus, insulin-dependent, 19	purpura, schoenlein-henoch	stevens-johnson syndrome
aicardi-goutieres syndrome 5	hypersensitivity	pemphigus
agammaglobulinemia 6, autosomal recessive	chediak-higashi syndrome	lymphoma, t-cell, peripheral
aids-related kaposi sarcoma	bruton type agammaglobulinemia	ectodermal dysplasia, anhidrotic, with immunodeficiency, osteopetrosis, and lymphedema
hypersensitivity, immediate	invasive pneumococcal disease, recurrent isolated, 1	severe combined immunodeficiency, autosomal recessive, t cell-negative, b cell-positive, nk cell-pos
eosinophilic esophagitis	lymphoma	pemphigoid, bullous
arthritis, rheumatoid	complement component 5 deficiency	precursor b-cell lymphoblastic leukemia-lymphoma
diffuse cerebral sclerosis of schilder	immunodeficiency due to defect in cd3-zeta	leukemia, t-cell
aicardi-goutieres syndrome	purpura, schoenlein-henoch	urticaria
asthma-related traits, susceptibility to, 7	hiv-associated lipodystrophy syndrome	multiple sclerosis
asthma, aspirin-induced	hereditary sensory and autonomic neuropathies	precursor cell lymphoblastic leukemia-lymphoma
drug hypersensitivity	lupus nephritis	pemphigoid, bullous
alpha/beta t-cell lymphopenia with gamma/delta t-cell expansion, severe cytomegalovirus infection, a	granuloma, respiratory tract	pemphigoid, bullous
complement component 8 deficiency, type ii	neuropathy, hereditary sensory and autonomic, type iia	thyroiditis, autoimmune
asthma, aspirin-induced	complement component c1r/c1s deficiency	wiskott-aldrich syndrome
aicardi-goutieres syndrome	complement component 7 deficiency	respiratory hypersensitivity
complement component 8 deficiency, type i	irak4 deficiency	myd88 deficiency
complement component 2 deficiency	hashimoto disease	multiple myeloma
acquired angioedema	hyper-ige recurrent infection syndrome, autosomal dominant	severe combined immunodeficiency with microcephaly, growth retardation, and sensitivity to ionizing
granulomatous disease, chronic, autosomal recessive, cytochrome b-positive, type i	lymphoma, mantle-cell	severe combined immunodeficiency with microcephaly, growth retardation, and sensitivity to ionizing
acquired immunodeficiency syndrome	glomerulonephritis, iga	severe combined immunodeficiency due to adenosine deaminase deficiency
hiv wasting syndrome	reticular dysgenesis	wolfram syndrome
granulomatous disease, chronic, x-linked	leukemia, t-cell	neuropathy, hereditary sensory and autonomic, type iia
lymphoma, large b-cell, diffuse	thyroiditis, autoimmune	wolfram syndrome
complement component 4, partial deficiency of	granulomatous disease, chronic, autosomal recessive, cytochrome b-positive, type ii	multiple sclerosis, relapsing-remitting
autoimmune polyendocrinopathy syndrome, type 1	lymphopenia	severe combined immunodeficiency, autosomal recessive, t cell-negative, b cell-positive, nk cell-neg
complement component 8 deficiency, type ii	dermatitis, atopic	immunodysregulation, polyendocrinopathy, and enteropathy, x-linked
band-like calcification with simplified gyration and polymicrogyria	immune dysfunction with t-cell inactivation due to calcium entry defect 2	wiskott-aldrich syndrome
dermatitis, atopic, 1	leukemia, t-cell	lymphoproliferative syndrome, x-linked, 2
complement component 6 deficiency	diabetes mellitus, insulin-dependent, 5	stevens-johnson syndrome
griscelli syndrome type 2	severe combined immunodeficiency due to adenosine deaminase deficiency	tyrosine kinase 2 deficiency
band-like calcification with simplified gyration and polymicrogyria	lymphoma, large b-cell, diffuse	myasthenia gravis
drug hypersensitivity	lupus erythematosus, systemic	uveomeningoencephalitic syndrome
acquired immunodeficiency syndrome	bare lymphocyte syndrome 2	complement component 8 deficiency, type ii
griscelli syndrome type 2	neuropathy, hereditary sensory and autonomic, type ia	severe combined immunodeficiency, autosomal recessive, t cell-negative, b cell-positive, nk cell-neg
lymphoma, non-hodgkin	multiple chemical sensitivity	rheumatoid arthritis, systemic juvenile
acquired angioedema	complement component 4, partial deficiency of	granulomatous disease, chronic, autosomal recessive, cytochrome b-positive, type ii
asthma, aspirin-induced	hypogammaglobulinemia and isolated growth hormone deficiency, x-linked	severe combined immunodeficiency, autosomal recessive, t cell-negative, b cell-positive, nk cell-neg
autoimmune lymphoproliferative syndrome	complement component 2 deficiency	complement component 8 deficiency, type ii
bruton type agammaglobulinemia	pemphigoid, bullous	t-lymphocytopenia
giant lymph node hyperplasia	glomerulonephritis, iga	granulomatous disease, chronic, autosomal recessive, cytochrome b-negative
complement component 8 deficiency, type i	diabetes mellitus, insulin-dependent, 20	rheumatoid arthritis, systemic juvenile
dermatitis, atopic, 4	severe combined immunodeficiency due to adenosine deaminase deficiency	thyrotoxic periodic paralysis, susceptibility to, 1
glomerulonephritis, iga	sarcoidosis, early-onset	thyrotoxic periodic paralysis, susceptibility to, 1
lymphoma, b-cell	tyrosine kinase 2 deficiency	wolfram syndrome
dermatitis, atopic, 4	diabetes mellitus, insulin-dependent, 19	leukocyte adhesion deficiency, type iii
giant lymph node hyperplasia	hashimoto disease	polyendocrinopathies, autoimmune
arthritis, rheumatoid	hepatitis, autoimmune	urticaria
chediak-higashi syndrome	drug eruptions	job syndrome
acquired angioedema	bare lymphocyte syndrome, type i	hyper-ige recurrent infection syndrome, autosomal dominant
glomerulopathy with fibronectin deposits	hypogammaglobulinemia and isolated growth hormone deficiency, x-linked	tn syndrome
bare lymphocyte syndrome, type i	graft vs host disease	leukocyte-adhesion deficiency syndrome
granulomatous disease, chronic, autosomal recessive, cytochrome b-negative	leukemia, hairy cell	wiskott-aldrich syndrome
aicardi-goutieres syndrome	asthma-related traits, susceptibility to, 7	masp2 deficiency
anaphylaxis	ataxia telangiectasia	thyroiditis, autoimmune
immune dysfunction with t-cell inactivation due to calcium entry defect 1	lymphoma, extranodal nk-t-cell	noonan syndrome-like disorder with or without juvenile myelomonocytic leukemia
food hypersensitivity	leukemia, lymphoid	stevens-johnson syndrome
food hypersensitivity	hiv infections	leukemia, hairy cell
bruton type agammaglobulinemia	granuloma, respiratory tract	iga deficiency
complement component 4, partial deficiency of	familial cold autoinflammatory syndrome 1	neuromyelitis optica
diabetes mellitus, insulin-dependent, 22	thyrotoxic periodic paralysis, susceptibility to, 1	wolcott-rallison syndrome
asthma-related traits, susceptibility to, 7	diabetes mellitus, insulin-dependent, 20	hiv wasting syndrome
alpha/beta t-cell lymphopenia with gamma/delta t-cell expansion, severe cytomegalovirus infection, a	diabetes mellitus, insulin-dependent, 22	immunodysregulation, polyendocrinopathy, and enteropathy, x-linked
aicardi-goutieres syndrome 5	diabetes mellitus, insulin-dependent, 22	multiple chemical sensitivity
band-like calcification with simplified gyration and polymicrogyria	granuloma, respiratory tract	griscelli syndrome type 2
complement component 2 deficiency	lymphangioleiomyomatosis	lymphoma, large-cell, anaplastic
band-like calcification with simplified gyration and polymicrogyria	mevalonate kinase deficiency	severe combined immunodeficiency, autosomal recessive, t cell-negative, b cell-positive, nk cell-pos
addison disease	glomerulopathy with fibronectin deposits	hyper-igm immunodeficiency syndrome
aids-related kaposi sarcoma	lymphoma	severe combined immunodeficiency with sensitivity to ionizing radiation
bare lymphocyte syndrome 2	immune dysfunction with t-cell inactivation due to calcium entry defect 2	t cell immunodeficiency primary
immune complex diseases	neutrophil immunodeficiency syndrome	precursor t-cell lymphoblastic leukemia-lymphoma
hyper-ige recurrent infection syndrome, autosomal dominant	severe combined immunodeficiency with sensitivity to ionizing radiation	thyrotoxic periodic paralysis, susceptibility to, 1
autoimmune polyendocrinopathy syndrome, type 1	irak4 deficiency	neuropathy, hereditary sensory and autonomic, type iia
asthma	myasthenia gravis	precursor t-cell lymphoblastic leukemia-lymphoma
diabetes mellitus, insulin-dependent, 12	granulomatous disease, chronic, autosomal recessive, cytochrome b-negative	lymphoma, t-cell, peripheral
irak4 deficiency	lymphoma, mantle-cell	pemphigoid, bullous
angioedemas, hereditary	early-onset ataxia with oculomotor apraxia and hypoalbuminemia	granuloma, respiratory tract
noonan syndrome-like disorder with loose anagen hair	peanut hypersensitivity	precursor cell lymphoblastic leukemia-lymphoma
cd8 deficiency, familial	job syndrome	leukocyte adhesion deficiency, type iii
diabetes mellitus, insulin-dependent, 5	iga deficiency	job syndrome
bare lymphocyte syndrome, type i	complement component 7 deficiency	job syndrome
dermatitis, atopic, 2	granuloma, respiratory tract	schimke immunoosseous dysplasia
ataxia telangiectasia	glomerulonephritis, membranous	thyrotoxic periodic paralysis, susceptibility to, 1
ectodermal dysplasia, anhidrotic, with immunodeficiency, osteopetrosis, and lymphedema	hypersensitivity, immediate	lymphopenia
encephalomyelitis, autoimmune, experimental	neuropathy, hereditary sensory and autonomic, type ia	stevens-johnson syndrome
graft vs host disease	hashimoto disease	kernicterus
angioedema	lymphoma, large b-cell, diffuse	severe combined immunodeficiency with microcephaly, growth retardation, and sensitivity to ionizing
glomerulopathy with fibronectin deposits	hyper-ige recurrent infection syndrome, autosomal dominant	lymphopenia
immunodeficiency-centromeric instability-facial anomalies syndrome 1	lymphoproliferative syndrome, x-linked, 2	myasthenia gravis
agammaglobulinemia	autoimmune lymphoproliferative syndrome	reticuloendotheliosis, familial, with eosinophilia
asthma	autoimmune disease, susceptibility to, 1	reticular dysgenesis
immune dysfunction with t-cell inactivation due to calcium entry defect 2	lig4 syndrome	severe combined immunodeficiency with microcephaly, growth retardation, and sensitivity to ionizing
aicardi-goutieres syndrome	glomerulonephritis, iga	wiskott-aldrich syndrome
giant lymph node hyperplasia	hereditary angioedema type iii	ige responsiveness, atopic
combined cellular and humoral immune defects with granulomas	lymphoma, large b-cell, diffuse	vitiligo-associated multiple autoimmune disease susceptibility 1
alpha/beta t-cell lymphopenia with gamma/delta t-cell expansion, severe cytomegalovirus infection, a	giant lymph node hyperplasia	hereditary angioedema types i and ii
agammaglobulinemia 6, autosomal recessive	diabetes mellitus, type 1	lymphoma, large b-cell, diffuse
leukocyte-adhesion deficiency syndrome	lymphoproliferative syndrome, x-linked, 2	urticaria
angioedemas, hereditary	leukocyte adhesion deficiency, type iii	lymphoma, follicular
autoimmune lymphoproliferative syndrome	immunoglobulin a deficiency 2	irak4 deficiency
complement component 8 deficiency, type i	giant lymph node hyperplasia	hyper-igm immunodeficiency syndrome
complement component 8 deficiency, type i	leukemia, t-cell	multiple myeloma
leukemia, t-cell	severe combined immunodeficiency, autosomal recessive, t cell-negative, b cell-negative, nk cell-pos	wiskott-aldrich syndrome
diabetes mellitus, type 1	granuloma, respiratory tract	immunoglobulin a deficiency 2
acquired immunodeficiency syndrome	rhinitis, allergic, perennial	sarcoidosis
job syndrome	noonan syndrome-like disorder with or without juvenile myelomonocytic leukemia	precursor t-cell lymphoblastic leukemia-lymphoma
lymphoma, t-cell, peripheral	noonan syndrome-like disorder with loose anagen hair	rhinitis, allergic, perennial
alveolitis, extrinsic allergic	dermatitis, atopic	drug eruptions
asthma-related traits, susceptibility to, 5	ectodermal dysplasia, anhidrotic, with immunodeficiency, osteopetrosis, and lymphedema	immunodeficiency due to defect in cd3-zeta
alveolitis, extrinsic allergic	anaphylaxis	granulomatous disease, chronic
complement component 6 deficiency	iga deficiency	severe combined immunodeficiency
hiv-associated lipodystrophy syndrome	reticuloendotheliosis, familial, with eosinophilia	tn syndrome
complement component 8 deficiency, type i	immune dysfunction with t-cell inactivation due to calcium entry defect 2	lymphoma, t-cell
autoimmune polyendocrinopathy syndrome, type 1	bare lymphocyte syndrome, type i	immunodeficiency due to defect in cd3-zeta
glomerulonephritis, iga	graft vs host disease	hepatitis, autoimmune
dysautonomia, familial	ectodermal dysplasia, hypohidrotic, with immune deficiency	neuropathy, hereditary sensory and autonomic, type ic
autoimmune lymphoproliferative syndrome	granulomatous disease, chronic	severe combined immunodeficiency, autosomal recessive, t cell-negative, b cell-positive, nk cell-pos
agammaglobulinemia 6, autosomal recessive	granulomatous disease, chronic	sjogren's syndrome
arthritis, rheumatoid	schimke immunoosseous dysplasia	tyrosine kinase 2 deficiency
agammaglobulinemia	hypersensitivity	invasive pneumococcal disease, recurrent isolated, 2
immunodeficiency due to defect in mapbp-interacting protein	lymphoma, b-cell	noonan syndrome-like disorder with loose anagen hair
glomerulonephritis, membranoproliferative	ige responsiveness, atopic	sjogren's syndrome
dermatitis, allergic contact	immunodeficiency due to defect in mapbp-interacting protein	rheumatoid arthritis, systemic juvenile
arthritis, juvenile	hodgkin disease	muckle-wells syndrome
hodgkin disease	neutrophil immunodeficiency syndrome	rhinitis, allergic, perennial
autoimmune polyendocrinopathy syndrome, type 1	reticuloendotheliosis, familial, with eosinophilia	riddle syndrome
dysautonomia, familial	severe combined immunodeficiency, autosomal recessive, t cell-negative, b cell-negative, nk cell-pos	severe combined immunodeficiency, autosomal recessive, t cell-negative, b cell-positive, nk cell-pos
asthma-related traits, susceptibility to, 5	diabetes mellitus, insulin-dependent, 2	severe combined immunodeficiency due to adenosine deaminase deficiency
asthma, aspirin-induced	complement component 6 deficiency	myd88 deficiency
hyper-ige recurrent infection syndrome, autosomal dominant	immunoglobulin a deficiency 2	lymphoma, follicular
bruton type agammaglobulinemia	eosinophilic esophagitis	tyrosine kinase 2 deficiency
hyper-igm immunodeficiency syndrome	immunodeficiency without anhidrotic ectodermal dysplasia	pemphigoid, bullous
granulomatous disease, chronic	stevens-johnson syndrome	wiskott-aldrich syndrome
immunodeficiency without anhidrotic ectodermal dysplasia	interleukin 2 receptor, alpha, deficiency of	lymphoma
hyper-igm immunodeficiency syndrome, type 1	lymphopenia	multiple chemical sensitivity
aids-related kaposi sarcoma	asthma	whim syndrome
graves ophthalmopathy	lymphangioleiomyomatosis	severe combined immunodeficiency with microcephaly, growth retardation, and sensitivity to ionizing
autoimmune lymphoproliferative syndrome, type iia	leukocyte-adhesion deficiency syndrome	lymphopenia
encephalomyelitis, autoimmune, experimental	lymphoma, extranodal nk-t-cell	spondyloenchondrodysplasia
dermatitis, allergic contact	hereditary angioedema type iii	lymphoma, large b-cell, diffuse
asthma, aspirin-induced	autoimmune disease, susceptibility to, 1	t cell immunodeficiency primary
glomerulonephritis, iga	irak4 deficiency	multiple sclerosis
complement component 2 deficiency	dermatitis, atopic	precursor cell lymphoblastic leukemia-lymphoma
alveolitis, extrinsic allergic	ataxia telangiectasia	polyendocrinopathies, autoimmune
asthma-related traits, susceptibility to, 5	diabetes mellitus, type 1	hypersensitivity, delayed
dermatitis, allergic contact	hypogammaglobulinemia and isolated growth hormone deficiency, x-linked	lymphoma, t-cell
arthritis, rheumatoid	diabetes mellitus, insulin-dependent, 2	eosinophilic esophagitis
hereditary angioedema type iii	lymphangioleiomyomatosis	t-lymphocytopenia
dysautonomia, familial	lig4 syndrome	neutrophil immunodeficiency syndrome
autoimmune polyendocrinopathy syndrome, type 1	diabetes mellitus, type 1	noonan syndrome-like disorder with or without juvenile myelomonocytic leukemia
asthma-related traits, susceptibility to, 5	immunoglobulin a deficiency 2	riddle syndrome
complement component 8 deficiency, type ii	spondyloenchondrodysplasia	x-linked combined immunodeficiency diseases
alpha/beta t-cell lymphopenia with gamma/delta t-cell expansion, severe cytomegalovirus infection, a	diabetes mellitus, insulin-dependent, 2	schimke immunoosseous dysplasia
dermatitis, atopic	granulomatous disease, chronic	interleukin 2 receptor, alpha, deficiency of
immune complex diseases	irak4 deficiency	severe combined immunodeficiency due to adenosine deaminase deficiency
diabetes mellitus, insulin-dependent, 2	kernicterus	tn syndrome
band-like calcification with simplified gyration and polymicrogyria	hiv seropositivity	peanut hypersensitivity
diabetes mellitus, insulin-dependent, 19	lymphoproliferative disorders	neuromyelitis optica
dermatitis, atopic	diabetes mellitus, insulin-dependent, 5	ectodermal dysplasia, hypohidrotic, with immune deficiency
asthma	graft vs host disease	lymphoma, non-hodgkin
cd8 deficiency, familial	diabetes mellitus, insulin-dependent, 5	hepatitis, autoimmune
asthma, aspirin-induced	glomerulonephritis, membranous	immunodeficiency without anhidrotic ectodermal dysplasia
complement component 5 deficiency	lymphoma, t-cell, peripheral	pemphigoid, bullous
asthma-related traits, susceptibility to, 7	lymphoma, mantle-cell	thyroiditis, autoimmune
anaphylaxis	common variable immunodeficiency	sarcoidosis
hashimoto disease	immune dysfunction with t-cell inactivation due to calcium entry defect 1	pemphigus
chediak-higashi syndrome	diffuse cerebral sclerosis of schilder	multiple sclerosis
autoimmune disease, susceptibility to, 1	drug eruptions	wiskott-aldrich syndrome
encephalomyelitis, autoimmune, experimental	immunodysregulation, polyendocrinopathy, and enteropathy, x-linked	lymphoma
hashimoto disease	myasthenia gravis	schimke immunoosseous dysplasia
ataxia telangiectasia	complement component 8 deficiency, type ii	leukemia, lymphoid
autoimmune lymphoproliferative syndrome	lymphoma, non-hodgkin	lymphoproliferative syndrome, ebv-associated, autosomal, 1
granulomatous disease, chronic, x-linked	leukemia, hairy cell	t cell immunodeficiency primary
bruton type agammaglobulinemia	ectodermal dysplasia, anhidrotic, with immunodeficiency, osteopetrosis, and lymphedema	hyper-ige recurrent infection syndrome, autosomal dominant
dermatitis, atopic, 2	hereditary angioedema type iii	masp2 deficiency
common variable immunodeficiency	granulomatous disease, chronic, autosomal recessive, cytochrome b-positive, type ii	neuropathy, hereditary sensory and autonomic, type ic
complement component 2 deficiency	food hypersensitivity	precursor b-cell lymphoblastic leukemia-lymphoma
autoimmune polyendocrinopathy syndrome, type 1	diabetes mellitus, insulin-dependent, 2	hyper-igm immunodeficiency syndrome
arthritis, juvenile	leukemia-lymphoma, adult t-cell	x-linked combined immunodeficiency diseases
hodgkin disease	irak4 deficiency	lymphoma, b-cell
aids-related kaposi sarcoma	neuropathy, hereditary sensory and autonomic, type ia	severe combined immunodeficiency with microcephaly, growth retardation, and sensitivity to ionizing
severe combined immunodeficiency, autosomal recessive, t cell-negative, b cell-positive, nk cell-neg	thyroiditis, autoimmune	tn syndrome
autoimmune diseases	mevalonate kinase deficiency	precursor b-cell lymphoblastic leukemia-lymphoma
granulomatous disease, chronic, autosomal recessive, cytochrome b-positive, type i	lymphoma, t-cell	rhinitis, allergic, perennial
autoimmune disease, susceptibility to, 1	complement component 2 deficiency	granulomatous disease, chronic, autosomal recessive, cytochrome b-positive, type ii
glomerulonephritis, membranoproliferative	hyper-igm immunodeficiency syndrome, type 1	spondyloenchondrodysplasia
agammaglobulinemia 6, autosomal recessive	complement component 4, partial deficiency of	noonan syndrome-like disorder with loose anagen hair
aicardi-goutieres syndrome 5	dermatitis, atopic, 1	precursor cell lymphoblastic leukemia-lymphoma
asthma-related traits, susceptibility to, 7	multiple sclerosis	neuropathy, hereditary sensory and autonomic, type ic
alpha/beta t-cell lymphopenia with gamma/delta t-cell expansion, severe cytomegalovirus infection, a	arthritis, juvenile	multiple chemical sensitivity
dermatitis, atopic, 4	hodgkin disease	hypersensitivity, delayed
combined cellular and humoral immune defects with granulomas	hereditary angioedema type iii	t-lymphocytopenia
drug hypersensitivity	familial cold autoinflammatory syndrome 1	graft vs host disease
diabetes mellitus, insulin-dependent, 19	osteopetrosis, autosomal recessive 7	riddle syndrome
complement component 2 deficiency	leukocyte-adhesion deficiency syndrome	multiple myeloma
diabetes mellitus, insulin-dependent, 2	granuloma, foreign-body	granuloma, respiratory tract
masp2 deficiency	precursor b-cell lymphoblastic leukemia-lymphoma	severe combined immunodeficiency, autosomal recessive, t cell-negative, b cell-positive, nk cell-pos
acquired immunodeficiency syndrome	bruton type agammaglobulinemia	urticaria
arthritis, juvenile	diabetes mellitus, insulin-dependent, 2	wiskott-aldrich syndrome
aicardi-goutieres syndrome	diabetes mellitus, insulin-dependent, 10	diabetes mellitus, insulin-dependent, 2
food hypersensitivity	hashimoto disease	sarcoidosis, early-onset
bare lymphocyte syndrome 2	lymphoproliferative syndrome, x-linked, 2	thyroiditis, autoimmune
lymphangioleiomyomatosis	muckle-wells syndrome	wiskott-aldrich syndrome
food hypersensitivity	hiv wasting syndrome	rheumatoid arthritis, systemic juvenile
agammaglobulinemia 4, autosomal recessive	eosinophilic esophagitis	immunodeficiency due to defect in cd3-zeta
alveolitis, extrinsic allergic	autoimmune lymphoproliferative syndrome	invasive pneumococcal disease, recurrent isolated, 2
autoimmune diseases	hyper-igm immunodeficiency syndrome	mevalonate kinase deficiency
autoimmune disease, susceptibility to, 1	hodgkin disease	neuromyelitis optica
complement component 8 deficiency, type ii	hepatic venoocclusive disease with immunodeficiency	lymphoma, t-cell, peripheral
angioedema	complement component 8 deficiency, type i	diabetes mellitus, insulin-dependent, 10
complement component 6 deficiency	dermatitis, allergic contact	immune dysfunction with t-cell inactivation due to calcium entry defect 1
hiv infections	riddle syndrome	thyroiditis, autoimmune
complement component 5 deficiency	ectodermal dysplasia, anhidrotic, with t-cell immunodeficiency, autosomal dominant	granulomatous disease, chronic, autosomal recessive, cytochrome b-positive, type i
anaphylaxis	complement component 6 deficiency	graft vs host disease
diabetes mellitus, insulin-dependent, 2	glomerulonephritis, membranoproliferative	griscelli syndrome type 2
leukemia, t-cell	t cell immunodeficiency primary	tyrosine kinase 2 deficiency
agammaglobulinemia 4, autosomal recessive	immunoglobulin a deficiency 2	rhinitis, allergic, perennial
agammaglobulinemia 6, autosomal recessive	severe combined immunodeficiency, autosomal recessive, t cell-negative, b cell-positive, nk cell-pos	vitiligo-associated multiple autoimmune disease susceptibility 1
burkitt lymphoma	hereditary angioedema type iii	serum sickness
ige responsiveness, atopic	immunologic deficiency syndromes	sjogren's syndrome
diabetes mellitus, insulin-dependent, 2	myasthenia gravis	urticaria
complement component 6 deficiency	hiv-associated lipodystrophy syndrome	sjogren's syndrome
drug eruptions	glomerulonephritis, iga	lymphoma, t-cell, cutaneous
diabetes mellitus, insulin-dependent, 20	iga deficiency	neuropathy, hereditary sensory and autonomic, type ia
ectodermal dysplasia, anhidrotic, with immunodeficiency, osteopetrosis, and lymphedema	mevalonate kinase deficiency	precursor b-cell lymphoblastic leukemia-lymphoma
bare lymphocyte syndrome 2	hypersensitivity	immunodeficiency-centromeric instability-facial anomalies syndrome 1
glomerulonephritis, membranoproliferative	lig4 syndrome	muckle-wells syndrome
aicardi-goutieres syndrome 5	immunodeficiency due to defect in mapbp-interacting protein	rhinitis, allergic, perennial
arthritis, rheumatoid	chediak-higashi syndrome	wolcott-rallison syndrome
kernicterus	multiple sclerosis, relapsing-remitting	severe combined immunodeficiency, autosomal recessive, t cell-negative, b cell-positive, nk cell-pos
bare lymphocyte syndrome 2	muckle-wells syndrome	severe combined immunodeficiency with sensitivity to ionizing radiation
diabetes mellitus, insulin-dependent, 10	hiv seropositivity	leukemia, t-cell
alpha/beta t-cell lymphopenia with gamma/delta t-cell expansion, severe cytomegalovirus infection, a	complement component 7 deficiency	dermatitis, atopic, 4
ectodermal dysplasia, hypohidrotic, with immune deficiency	lymphoma, non-hodgkin	stevens-johnson syndrome
asthma-related traits, susceptibility to, 5	chediak-higashi syndrome	immunodeficiency due to defect in cd3-zeta
band-like calcification with simplified gyration and polymicrogyria	lymphoma, b-cell	multiple myeloma
combined cellular and humoral immune defects with granulomas	lymphoma, non-hodgkin	lymphoproliferative syndrome, x-linked, 2
agammaglobulinemia	complement component 7 deficiency	granulomatous disease, chronic, autosomal recessive, cytochrome b-positive, type ii
ectodermal dysplasia, hypohidrotic, with immune deficiency	immunodeficiency due to defect in cd3-zeta	irak4 deficiency
acquired angioedema	neuropathy, hereditary sensory and autonomic, type iia	wolfram syndrome
lymphoma	t cell immunodeficiency primary	x-linked combined immunodeficiency diseases
addison disease	muckle-wells syndrome	purpura, schoenlein-henoch
encephalomyelitis, autoimmune, experimental	immunodeficiency due to defect in cd3-zeta	reticular dysgenesis
irak4 deficiency	leukocyte-adhesion deficiency syndrome	severe combined immunodeficiency with sensitivity to ionizing radiation
dysautonomia, familial	eosinophilic esophagitis	granulomatous disease, chronic, x-linked
agammaglobulinemia 4, autosomal recessive	hypersensitivity, immediate	lymphoma, t-cell, cutaneous
alpha/beta t-cell lymphopenia with gamma/delta t-cell expansion, severe cytomegalovirus infection, a	ectodermal dysplasia, anhidrotic, with t-cell immunodeficiency, autosomal dominant	hyper-igm immunodeficiency syndrome
complement component 5 deficiency	hypogammaglobulinemia and isolated growth hormone deficiency, x-linked	myasthenia gravis
diabetes mellitus, insulin-dependent, 5	ectodermal dysplasia, hypohidrotic, with immune deficiency	tn syndrome
asthma-related traits, susceptibility to, 7	glomerulonephritis, membranous	immunoblastic lymphadenopathy
autoimmune disease, susceptibility to, 1	lymphoma, extranodal nk-t-cell	myasthenia gravis
complement component 6 deficiency	diabetes mellitus, insulin-dependent, 12	iga deficiency
