# Supplementary material for: Computational analysis of multimorbidity between asthma, eczema and rhinitis
Source: PLoS One. 2017 Jun 9;12(6):e0179125. doi: 10.1371/journal.pone.0179125 (PMC5466323; doi:10.1371/journal.pone.0179125)
Supplement: S2 File — This network was generated by combining data from the HIPPIE, Reactome and InnateDB databases (see Methods in the main paper). (GZ) [file pone.0179125.s011.gz]

Archive with 1 entries (1 files):
- File_S2.tsv
