# Supplementary material for: Computational analysis of multimorbidity between asthma, eczema and rhinitis
Source: PLoS One. 2017 Jun 9;12(6):e0179125. doi: 10.1371/journal.pone.0179125 (PMC5466323; doi:10.1371/journal.pone.0179125)
Supplement: S2 File — This network was generated by combining data from the HIPPIE, Reactome and InnateDB databases (see Methods in the main paper). (GZ) [file pone.0179125.s011.gz › File_S2.tsv]

P02656	Q07869
P02656	P41235
P02656	P01130
P02656	P34741
P02656	Q07954
P02656	P35052
P02656	O75487
P02656	P51654
P02656	Q04206
P02656	P31431
P02656	P06858
P02656	P19793
P02656	P28702
P02656	P19838
P02656	Q9Y561
P02656	P98160
P02656	O75056
P02656	P17676
P02656	P02649
P02656	Q14114
P02656	Q9Y625
P02656	P18827
P02656	Q7Z4F1
P02656	P48443
P02656	P15336
P02656	P22415
P02656	P98164
O95931	Q92769
O95931	Q06587
O95931	Q8IXK0
O95931	P35227
O95931	Q99496
O95931	Q9BYE7
P09651	Q16539
P09651	P24928
P09651	P62314
P09651	P26368
P09651	P52435
P09651	P62875
P09651	Q15287
P09651	Q01081
P09651	Q5BKZ1
P09651	P23246
P09651	O43172
P09651	O94913
P09651	P51991
P09651	P20226
P09651	P14678
P09651	P61978
P09651	O14979
P09651	Q86U42
P09651	P26599
P09651	P25963
P09651	P52434
P09651	P52272
P09651	P61218
P09651	P14866
P09651	P09012
P09651	P52298
P09651	Q13247
P09651	Q9Y3B4
P09651	Q12874
P09651	O15514
P09651	Q05519
P09651	P08651
P09651	Q07955
P09651	Q8IYB3
P09651	Q14683
P09651	P61326
P09651	Q96DI7
P09651	Q15427
P09651	Q14103
P09651	P19387
P09651	Q15393
P09651	P62306
P09651	O75643
P09651	Q15459
P09651	O43809
P09651	Q4G0J3
P09651	P17844
P09651	Q13435
P09651	O60506
P09651	Q8IWZ8
P09651	P30876
P09651	P51003
P09651	Q13243
P09651	P62304
P09651	P62487
P09651	P07910
P09651	Q13148
P09651	P52756
P09651	Q01130
P09651	Q08170
P09651	P67809
P09651	Q9BWJ5
P09651	P38159
P09651	P52597
P09651	P11940
P09651	P62308
P09651	P22626
P09651	P05231
P09651	Q7RTV0
P09651	P04141
P09651	P84103
P09651	Q9BZI7
P09651	Q15365
P09651	P01106
P09651	P83876
P09651	P09661
P09651	P55795
P09651	P36954
P09651	O75533
P09651	P31942
P09651	Q15366
P09651	Q13242
P09651	P62316
P09651	Q9BUJ2
P09651	P08579
P09651	Q08211
P09651	Q14653
P09651	P31943
P09651	Q15428
P09651	Q92499
P09651	P55769
P09651	Q9Y5S9
P09651	P19388
P09651	Q6P2Q9
P09651	P62318
P09651	P08621
P09651	P21675
P09651	Q16629
P09651	Q9Y333
P09651	O43390
P09651	Q92841
P09651	Q96KR1
P09651	Q12824
P09651	O94906
Q96EY1	P04629
Q96EY1	O60674
Q96EY1	P38484
Q96EY1	P20936
Q96EY1	O15198
Q96EY1	Q86X55
Q96EY1	P01138
Q96EY1	P11142
Q04771	O95972
Q04771	O60383
Q04771	P62942
Q04771	O15198
Q04771	Q9UK05
Q04771	P27037
Q04771	Q13145
Q04771	P01137
Q04771	Q15797
Q04771	Q16671
Q04771	Q13705
Q04771	P39905
Q04771	P61812
Q04771	Q9NR23
Q04771	P10600
Q04771	P12645
Q04771	Q6KF10
Q04771	O00292
Q04771	P84022
Q04771	P12644
Q04771	P12643
Q04771	Q96S42
Q04771	P58166
Q04771	P09529
Q04771	P22004
Q04771	P27539
Q04771	O95393
Q04771	P03971
Q04771	Q15796
Q04771	O14793
Q9H7P6	Q99816
Q9H7P6	Q8WUM4
P19793	Q8TAQ2
P19793	Q71SY5
P19793	Q9ULU4
P19793	Q99594
P19793	P32302
P19793	P0CG48
P19793	P01137
P19793	Q15561
P19793	Q13489
P19793	P36956
P19793	Q6STE5
P19793	P22732
P19793	Q5T4S7
P19793	P27986
P19793	P35228
P19793	O96028
P19793	P15172
P19793	P46937
P19793	Q96GM5
P19793	Q9GZV5
P19793	Q86SK9
P19793	O60907
P19793	Q8IYB3
P19793	Q9HD15
P19793	Q9Y5B9
P19793	Q8TB61
P19793	Q13133
P19793	Q15562
P19793	P24522
P19793	Q02880
P19793	P56524
P19793	P22307
P19793	O00767
P19793	Q9NY65
P19793	P20749
P19793	Q6P1M0
P19793	Q07869
P19793	Q12772
P19793	O15379
P19793	Q96ST3
P19793	Q9NRR5
P19793	P07711
P19793	Q92922
P19793	P01854
P19793	P28702
P19793	P02730
P19793	P19838
P19793	Q6ZRS2
P19793	Q9BX66
P19793	Q9HBA0
P19793	P42229
P19793	P05121
P19793	Q96RS0
P19793	P04628
P19793	Q8N474
P19793	Q04206
P19793	P51692
P19793	Q9BZK7
P19793	O75182
P19793	Q13573
P19793	Q9H3D4
P19793	P17936
P19793	P13631
P19793	Q8N5D0
P19793	O00327
P19793	P35637
P19793	P01375
P19793	P28347
P19793	P14859
P19793	O15516
P19793	O00744
P57075	P00533
P57075	P22681
P57075	Q05193
P57075	P68036
Q9Y2U9	Q93034
Q9Y2U9	Q13617
Q9Y2U9	Q9UMR2
Q9P021	Q15700
Q9P021	Q12959
Q9P021	Q92796
O60443	Q09472
O60443	P21246
P27986	Q99836
P27986	P43403
P27986	Q13114
P27986	P10721
P27986	P16885
P27986	Q00722
P27986	P61224
P27986	Q13009
P27986	Q9NQ66
P27986	O60603
P27986	Q9UBW7
P27986	Q05513
P27986	P98155
P27986	O15056
P27986	P49023
P27986	P25963
P27986	P00533
P27986	P43405
P27986	P49767
P27986	P19174
P27986	Q8IY22
P27986	Q86VZ5
P27986	P34741
P27986	Q8N3E9
P27986	Q9Y2I7
P27986	P52735
P27986	P18031
P27986	Q14790
P27986	Q9BYB0
P27986	Q8TBX8
P27986	Q01970
P27986	P35568
P27986	O15164
P27986	P84095
P27986	P15153
P27986	Q9NQS3
P27986	P37173
P27986	P38398
P27986	P62993
P27986	P48426
P27986	P78356
P27986	P19235
P27986	Q16739
P27986	P07949
P27986	P10301
P27986	O00463
P27986	P60484
P27986	O60331
P27986	P16234
P27986	O60674
P27986	P04049
P27986	P41597
P27986	P63000
P27986	P14778
P27986	Q15147
P27986	O43914
P27986	O43426
P27986	P42336
P27986	P63104
P27986	Q05655
P27986	P08069
P27986	P40763
P27986	P15311
P27986	Q99755
P27986	P41743
P27986	P29317
P27986	P78509
P27986	P17405
P27986	P06127
P27986	Q9P212
P27986	Q14289
P27986	P60763
P27986	P23443
P27986	Q8IZJ1
P27986	P03372
P27986	Q02156
P27986	P60953
P27986	P14672
P27986	O14986
P27986	P51178
P27986	P42681
P27986	P06241
P27986	P16410
P27986	P04626
P27986	Q8TCU6
P27986	Q04206
P27986	P19320
P27986	P12318
P27986	P07333
P27986	P35222
P27986	Q9NZC2
P27986	P48023
P27986	Q13077
P27986	P04275
P27986	P15391
P27986	Q8NER1
P27986	Q99835
P27986	P17181
P27986	Q12933
P27986	P62834
P27986	Q6PIZ9
P27986	P61586
O43865	Q14643
O76081	P08754
O76081	Q92504
O76081	Q96CS3
O76081	P63096
O76081	Q9Y3E2
O76081	Q15126
O76081	Q9Y230
O76081	O15269
O76081	O76003
O76081	Q9UI30
O76081	Q01105
O76081	P46459
O76081	P40222
P21980	P09211
P21980	P02751
P21980	P06400
P21980	P63165
P05388	P61247
P05388	P46782
P05388	P20226
P05388	P39019
P05388	P62851
P05388	Q9Y5M8
P05388	P62857
P05388	P63220
P05388	P62854
P05388	P62249
P05388	P62269
P05388	P08865
P05388	P46781
P05388	P25398
P05388	P05387
P05388	P49458
P05388	Q9H0W8
P05388	P62841
P05388	P60866
P05388	P08240
P05388	Q86US8
P05388	P23396
P05388	P62081
P05388	Q9UHB9
P05388	P09132
P05388	P46783
P05388	P43307
P05388	Q15629
P05388	Q9UNL2
P05388	Q9H1J1
P05388	P37108
P05388	P05386
P05388	P62753
P05388	P67812
P05388	Q92900
P05388	P42677
P05388	Q9BZI7
P05388	P62979
P05388	P62280
P05388	P61011
P05388	Q9HAU5
P05388	P62847
P05388	P60059
P05388	P62277
P05388	Q9BY50
P05388	O76094
P05388	P43308
P05388	P62987
P05388	P62266
P05388	P62701
P05388	P62273
P05388	P04843
P05388	Q96Q15
P05388	P60468
P05388	Q15005
P05388	P15880
P05388	P62263
P05388	Q8ND04
P05388	P22090
P05388	P08708
P05388	P51571
P05388	P62244
P05388	Q9Y6A9
P05388	Q92540
P05388	P04844
P05388	P61619
P05388	Q9UPR3
P05388	P21675
P05388	P61009
P05388	P62241
P49848	Q16594
P49848	Q04206
P49848	P29083
P49848	P04637
P49848	Q96B97
P49848	P21675
O43292	Q03405
O43292	Q96S52
O43292	Q9H490
P04150	Q8TAQ2
P04150	P13500
P04150	Q8NDX6
P04150	P24928
P04150	Q06710
P04150	Q9UER7
P04150	Q8N7H5
P04150	Q15773
P04150	Q9H307
P04150	P06239
P04150	P62875
P04150	P16220
P04150	P05549
P04150	P0CG48
P04150	P00813
P04150	P19793
P04150	Q8NAF0
P04150	P10276
P04150	P39019
P04150	P31749
P04150	P12757
P04150	Q96B42
P04150	Q86U42
P04150	P08047
P04150	O00232
P04150	P49848
P04150	P62249
P04150	Q9H7L9
P04150	Q9Y3B4
P04150	P22694
P04150	P12931
P04150	P80098
P04150	P49715
P04150	P26651
P04150	P28074
P04150	P15923
P04150	P12544
P04150	P17947
P04150	O95398
P04150	P09429
P04150	P22736
P04150	P51671
P04150	Q02556
P04150	O76076
P04150	P42224
P04150	P26583
P04150	P08833
P04150	Q92925
P04150	P27797
P04150	Q13547
P04150	P82094
P04150	P10588
P04150	Q15654
P04150	P05113
P04150	P28702
P04150	Q16881
P04150	P40763
P04150	P04141
P04150	Q6P1K2
P04150	P22612
P04150	P30050
P04150	O14744
P04150	P62280
P04150	P05121
P04150	P10914
P04150	O15534
P04150	Q9H4Z2
P04150	P53041
P04150	Q13451
P04150	Q14498
P04150	Q13485
P04150	P15880
P04150	Q9Y6Q9
P04150	P17612
P04150	P10145
P04150	Q04917
P04150	Q99638
P04150	Q15648
P04150	Q12888
P04150	P24468
P04150	Q9UL46
Q96RU7	Q13873
Q96RU7	P35638
Q96RU7	P28799
Q96RU7	P31749
Q96RU7	P67870
Q96RU7	Q8N2S1
Q96RU7	P18848
Q96RU7	Q04206
Q96RU7	P02751
Q96RU7	Q9Y2D1
Q96RU7	Q8IUQ4
Q9Y576	Q9Y2X8
Q9Y576	O15524
Q9Y576	Q9H672
Q9Y576	P19474
Q9Y576	Q9UNE7
Q9Y576	Q7Z3V4
Q9Y576	Q96BD6
Q9Y576	Q7Z419
Q9Y576	P62253
Q9Y576	P51668
Q9Y576	Q9H4P4
Q9Y576	Q8N3Y1
Q9Y576	Q9UKT5
Q9Y576	P0CG47
Q9Y576	Q96F44
Q9Y576	Q5T4S7
Q9Y576	Q96EF6
Q9Y576	Q96BH1
Q9Y576	Q969K3
Q9Y576	P63208
Q9Y576	O95714
Q9Y576	Q96Q27
Q9Y576	P62877
Q9Y576	Q99619
Q9Y576	O43164
Q9Y576	Q9Y2M5
Q9Y576	P61088
Q9Y576	Q96B02
Q9Y576	P61077
Q9Y576	Q969Q1
Q9Y576	Q96J02
Q9Y576	Q8N6D2
Q9Y576	Q9UK99
Q9Y576	Q16763
Q9Y576	P51965
Q9Y576	Q13191
Q9Y576	Q712K3
Q9Y576	P61086
Q9Y576	Q5XPI4
Q9Y576	Q15345
Q9Y576	Q8IWV8
Q9Y576	Q8NHZ8
Q9Y576	Q9UKB1
Q9Y576	Q9Y252
Q9Y576	Q96LR5
Q9Y576	P62256
Q9Y576	Q8NG27
Q9Y576	P63146
Q9Y576	P62987
Q9Y576	P49459
Q9Y576	Q9C0C9
Q9Y576	P30260
Q9Y576	Q9Y6I7
Q9Y576	Q9P2J3
Q9Y576	P46934
Q9Y576	Q14999
Q9Y576	Q9H2C0
Q9Y576	Q13042
Q9Y576	P49427
Q9Y576	Q14669
Q9Y576	Q9UJP4
Q9Y576	P40337
Q9Y576	Q96DX5
Q9Y576	O14543
Q9Y576	Q96A44
Q9Y576	Q8WVN8
Q9Y576	Q8WXK3
Q9Y576	O00762
Q9Y576	Q12834
Q9Y576	Q8IWV7
Q9Y576	P0CG48
Q9Y576	Q9C026
Q9Y576	Q5VVX9
Q9Y576	Q8TDB6
Q9Y576	Q9Y575
Q9Y576	Q7Z6Z7
Q9Y576	Q9Y385
Q9Y576	Q5VTB9
Q9Y576	Q9HAU4
Q9Y576	Q96NS5
Q9Y576	Q9HCE7
Q9Y576	Q5T447
Q9Y576	Q15819
Q9Y576	Q6UWE0
Q9Y576	Q13616
Q9Y576	Q96L50
Q9Y576	Q8WVD3
Q9Y576	Q13618
Q9Y576	Q8N2K1
Q9Y576	Q9Y4B6
Q9Y576	Q96PU5
Q9Y576	Q969H0
Q9Y576	Q9BYM8
Q9Y576	O14933
Q9Y576	Q8WXI3
Q9Y576	P62837
Q9Y576	Q9UHC7
Q9Y576	Q9NWX5
Q9Y576	Q9H4M3
Q9Y576	Q93034
Q9Y576	P68036
Q9Y576	Q13404
Q9Y576	O60291
Q9Y576	P61081
Q9Y576	Q8WXK4
Q9Y576	Q15370
Q9Y576	Q6ZNA4
Q9Y576	Q969M7
Q9Y576	Q13309
Q9Y576	Q14139
Q9Y576	O94972
Q9Y576	Q86Y13
Q9Y576	Q8NI29
Q9Y576	Q9H832
Q9Y576	P62979
Q9Y576	Q9UK22
Q9Y576	Q05516
Q9Y576	Q96PM5
Q9Y576	Q15386
Q9Y576	Q9UM11
Q9Y576	Q969T4
Q9Y576	Q13617
Q9Y576	Q13049
Q9Y576	Q9UJX2
Q9Y576	O60260
Q9Y576	Q9H0M0
Q9Y576	Q6ZMZ0
Q9Y576	P41226
Q9Y576	P78317
Q9Y576	Q7Z7E8
Q9Y576	Q9Y297
Q9Y576	Q7L5Y6
Q9Y576	Q9P2N7
Q9Y576	Q05086
Q9Y576	P60604
Q9Y576	Q9NRD1
Q9Y576	Q14145
O14654	O14508
O14654	Q02156
O14654	O14543
O14654	O00329
O14654	O15524
O14654	P18031
O14654	P29353
O14654	P46108
O14654	P45984
O14654	P46109
O14654	P42345
O14654	P42336
O14654	Q9UNF1
O14654	P07900
O14654	P28482
O14654	Q05655
O14654	P53779
O14654	P48736
O14654	P45983
O14654	Q92569
O14654	P42338
O14654	P27986
O14654	Q8WXH5
O14654	Q05513
O14654	P62993
O14654	P10586
O14654	P00533
O14654	P27361
O14654	O00459
O14654	Q8WYR1
P30460	Q9UIQ6
P30460	P26717
P30460	P43631
P30460	P43627
P30460	O43914
P30460	O94979
P30460	Q03518
P30460	O95486
P30460	Q13241
P30460	P01733
P30460	P30101
P30460	P43629
P30460	P01848
P30460	P43626
P30460	Q8NHJ6
P30460	P53992
P30460	Q8NHL6
P30460	P01850
P30460	Q9Y6B6
P30460	O75023
P30460	P26715
P30460	P43628
P30460	Q99706
P30460	Q15436
P30460	P55735
P30460	Q03519
P30460	O95487
P30460	O94855
P30460	P43632
P30460	P11021
P30460	Q8N423
P20929	P67936
P20929	P19429
P20929	P19237
P20929	P08670
P20929	P06753
P20929	P07951
P20929	P09493
P20929	P13805
P20929	P02585
P20929	P45378
P20929	Q07889
P20929	P63316
P20929	O15273
P20929	P48788
P20929	P45379
Q99933	P03372
Q99933	P04049
Q99933	P34932
Q99933	P06400
Q99933	P10275
Q99933	Q9UNE7
Q99933	Q04206
Q99933	P00533
Q99933	P01106
Q99933	P01100
Q99933	Q99075
Q99933	P04150
Q99933	P10415
Q99933	P05412
Q6VMQ6	P08047
Q6VMQ6	P29084
Q6VMQ6	Q15047
Q6VMQ6	Q13485
Q6VMQ6	Q9UIS9
Q7Z6B0	Q9UJY5
P05120	P08047
P05120	P50452
P05120	Q6P2Q9
P05120	P35237
P05120	P20618
P29992	Q16539
P29992	P22888
P29992	P43403
P29992	Q9GZT5
P29992	O14905
P29992	P16885
P29992	P25103
P29992	P0DJI8
P29992	Q00722
P29992	Q9NQ66
P29992	P01042
P29992	P25105
P29992	Q9UPR0
P29992	P49798
P29992	Q9NZK7
P29992	Q93097
P29992	Q15111
P29992	P01178
P29992	O15496
P29992	P45983
P29992	P39877
P29992	O14775
P29992	P12872
P29992	O75197
P29992	P46094
P29992	P61073
P29992	P27986
P29992	Q9UHM6
P29992	Q15077
P29992	O43612
P29992	P41594
P29992	Q9NZ20
P29992	P19174
P29992	P25101
P29992	P56704
P29992	Q8N3E9
P29992	O75962
P29992	Q92633
P29992	P04054
P29992	P43088
P29992	Q9UNK4
P29992	O95665
P29992	P50150
P29992	Q9UKP6
P29992	P16520
P29992	P48736
P29992	P20396
P29992	Q01970
P29992	P63218
P29992	Q13255
P29992	Q9Y5X5
P29992	P07492
P29992	P30989
P29992	O14745
P29992	O95399
P29992	Q9HAV0
P29992	Q9BX93
P29992	P50151
P29992	P28223
P29992	P29371
P29992	P30990
P29992	O75581
P29992	Q9BZM1
P29992	P62873
P29992	P0C869
P29992	P47900
P29992	P41220
P29992	Q9NS28
P29992	Q9BZM2
P29992	P63000
P29992	Q9UHF0
P29992	Q15147
P29992	P34981
P29992	Q5T6X5
P29992	Q15726
P29992	Q8TCW9
P29992	Q9UBI6
P29992	Q99500
P29992	P20366
P29992	P42336
P29992	P59768
P29992	Q9HC23
P29992	P34947
P29992	P20382
P29992	P56705
P29992	Q969F8
P29992	P28336
P29992	P47992
P29992	P58294
P29992	O60733
P29992	Q9UP65
P29992	Q969V1
P29992	P61952
P29992	Q9Y210
P29992	P28335
P29992	P21452
P29992	Q9P212
P29992	Q99705
P29992	P62879
P29992	P08949
P29992	P41221
P29992	P51178
P29992	P04628
P29992	P41595
P29992	P30968
P29992	P14555
P29992	P49795
P29992	P35367
P29992	P17612
P29992	Q8NFJ6
P29992	Q99677
P29992	P47712
P29992	O60262
P29992	Q9UGC6
P29992	P01148
P29992	Q92569
P29992	O00755
P29992	Q15743
P29992	P30679
P29992	Q15722
P29992	Q9UBD3
P29992	P50148
P29992	P43657
P29992	O00459
P29992	Q9HBW0
P29992	O00744
P29992	O60229
P53779	Q16539
P53779	Q13114
P53779	P01137
P53779	P61224
P53779	P10276
P53779	Q9NYJ8
P53779	Q99640
P53779	P45983
P53779	P04637
P53779	Q05513
P53779	P35228
P53779	P35236
P53779	P04150
P53779	Q03112
P53779	P22694
P53779	Q99523
P53779	Q15256
P53779	Q9NR28
P53779	Q15759
P53779	O95644
P53779	P53778
P53779	P54829
P53779	Q9Y4K3
P53779	P10600
P53779	O00165
P53779	P32121
P53779	P84095
P53779	P15153
P53779	P42224
P53779	O00463
P53779	P04049
P53779	P63000
P53779	Q04759
P53779	P11234
P53779	O15264
P53779	P06401
P53779	P19838
P53779	Q01538
P53779	P40763
P53779	P61812
P53779	Q07820
P53779	P11233
P53779	P22612
P53779	Q96GC6
P53779	Q9UPT6
P53779	P84022
P53779	Q01974
P53779	P60763
P53779	Q9UQF2
P53779	P41221
P53779	P08138
P53779	Q13485
P53779	Q04206
P53779	O43353
P53779	P01138
P53779	P17612
P53779	P51817
P53779	P49407
P53779	Q13077
P53779	P01111
P53779	P01375
P53779	Q12968
P53779	P62834
P53779	Q8N5C8
P53779	Q12933
P53779	P61586
P53779	Q15750
Q9UBN7	Q93077
Q9UBN7	Q71U36
Q9UBN7	Q96QV6
Q9UBN7	O60814
Q9UBN7	Q9NQC7
Q9UBN7	P62753
Q9UBN7	Q99879
Q9UBN7	Q96KK5
Q9UBN7	P63165
Q9UBN7	Q13885
Q9UBN7	P62826
Q9UBN7	Q09472
Q9UBN7	Q13283
Q9UBN7	Q99877
Q9UBN7	P25098
Q9UBN7	P68363
Q9UBN7	Q06330
Q9UBN7	Q9BVA1
Q9UBN7	Q93079
Q9UBN7	P06899
Q9UBN7	Q16778
Q9UBN7	Q9Y618
Q9UBN7	P20671
Q9UBN7	P49790
Q9UBN7	Q5QNW6
Q9UBN7	P04150
Q9UBN7	P58876
Q9UBN7	Q7L7L0
Q9UBN7	Q8TEM1
Q9UBN7	P07437
Q9UBN7	P37198
Q9UBN7	Q99878
Q9UBN7	P33778
Q9UBN7	Q99880
Q9UBN7	O60907
Q9UBN7	O15105
Q9UBN7	P13569
Q9UBN7	P04626
Q9UBN7	Q9BZK7
Q9UBN7	Q96A08
Q9UBN7	Q13573
Q9UBN7	P07900
Q9UBN7	Q01201
Q9UBN7	P46531
Q9UBN7	Q9NQ11
Q9UBN7	P62805
Q9UBN7	Q16777
Q9UBN7	Q8N257
Q9UBN7	P23527
Q9UBN7	Q8IUE6
Q9UBN7	O75376
Q9UBN7	P31689
Q08378	Q9HD26
P49802	P08754
P49802	P50148
P49802	P98161
Q15011	Q86TM6
Q15011	Q9P2P6
Q15011	P49768
Q15011	Q9BQE4
O95278	P54840
O95278	O15488
O95278	P62979
O95278	P46976
O95278	P0CG48
O95278	P13807
O95278	Q9UQK1
O95278	P62987
O95278	P0CG47
O95278	P49841
O95278	P54646
P49327	Q12772
P49327	P01106
P49327	P36956
P49327	P19793
P49327	O75604
Q96RK1	Q09472
Q96RK1	P05549
Q96RK1	Q92481
Q96RK1	Q92754
Q9NR61	P46531
Q9NR61	Q86YT6
Q9NR61	Q09472
Q9NR61	Q06330
Q9NR61	Q9UM47
Q9NR61	P62979
Q9NR61	A8MQ27
Q9NR61	Q9NZ42
Q9NR61	P0CG48
Q9NR61	Q92542
Q9NR61	P62987
Q9NR61	P0CG47
Q9NR61	Q96AX9
Q7Z569	O14807
Q7Z569	P01116
Q7Z569	P01111
Q7Z569	P01112
Q7Z569	P38398
Q7Z569	Q8IVT5
Q7Z569	P62070
Q7Z569	P10301
P21462	P62879
P21462	P63096
P21462	P84996
P21462	Q9UBI6
P21462	Q03405
P21462	P50150
P21462	P59768
P21462	P16520
P21462	P63218
P21462	O60262
P21462	P08754
P21462	P63092
P21462	O14775
P21462	P04899
P21462	Q9HAV0
P21462	P61952
P21462	P50148
P21462	P50151
P21462	Q5JWF2
P21462	P62873
P12319	Q07869
P12319	P04049
P12319	O43516
P12319	Q13469
P12319	Q08881
P12319	P29353
P12319	Q03181
P12319	P42336
P12319	P01854
P12319	Q9UQC2
P12319	P01834
P12319	P45983
P12319	P0CG05
P12319	Q05397
P12319	P20936
P12319	P27986
P12319	Q96E93
P12319	Q07889
P12319	P22415
P12319	O43561
P12319	P01100
P12319	P43405
P12319	P19174
P12319	Q9GZY6
P12319	P06241
P12319	P01112
P12319	P0CG04
P12319	P15498
P12319	Q9NYA1
P12319	P30273
P12319	P37231
P12319	P31994
P12319	P14317
P12319	P05412
P12319	P47712
P12319	O14939
P12319	Q92835
P12319	Q06124
P12319	P62993
P12319	P16591
P12319	P07948
P12319	Q13094
P12319	P0CG06
P50453	O75400
P50453	P10144
P50453	Q9UKY1
P41159	P40763
P41159	O15389
P41159	O43699
P41159	O14543
P41159	Q13131
P41159	Q9NRF2
P41159	P18031
P41159	Q06124
P41159	P51692
P41159	P42229
P41159	P52790
P41159	P01023
P41159	P20138
Q9BQ69	P01106
P18084	P67936
P18084	Q9Y4G6
P18084	P14649
P18084	P08758
P18084	P18206
P18084	P05129
P18084	Q03405
P18084	P01137
P18084	Q16363
P18084	P10451
P18084	P00749
P18084	Q8N3F8
P18084	O00622
P18084	P05771
P18084	P07947
P18084	P11047
P18084	P17252
P18084	Q9BX66
P18084	Q9BY76
P18084	P25391
P18084	P24844
P18084	Q9HD67
P18084	P07951
P18084	Q92752
P18084	P09493
P18084	Q05397
P18084	P07942
P18084	P78509
P18084	Q7Z4I7
P18084	P49023
P18084	P05121
P18084	Q9NVD7
P18084	P24043
P18084	Q14289
P18084	Q16787
P18084	P04004
P18084	P35443
P18084	P06753
P18084	P12931
P18084	Q07954
P18084	P24821
P18084	P48059
P18084	Q9UQP3
P18084	O15230
P18084	Q13753
P18084	O14950
P18084	P07996
P18084	P50552
P18084	Q9HBI1
P18084	Q9Y6N6
P18084	P35749
P18084	Q9Y490
P18084	P55268
P18084	P60660
P18084	O60504
P18084	P29536
P18084	P22105
P18084	P10600
P18084	P18827
P18084	P04275
P18084	Q13751
P18084	P35442
P20366	P46379
P20366	Q03403
P20366	P25103
P20366	P29371
P20366	P21452
P12273	P01730
Q96PR1	P22694
Q96PR1	P22612
Q96PR1	P17612
Q16181	O14613
Q16181	Q9NVA2
Q16181	Q9UHD8
Q8IV36	O15357
O95070	Q969M3
Q53HV7	Q93062
O75533	P62314
O75533	P26368
O75533	Q01130
O75533	Q08170
O75533	P67809
O75533	Q01081
O75533	Q9BWJ5
O75533	P62308
O75533	Q7RTV0
O75533	P14678
O75533	P84103
O75533	Q9BZI7
O75533	P83876
O75533	P09661
O75533	P09012
O75533	Q13247
O75533	Q13242
O75533	P62316
O75533	Q05519
O75533	Q14683
O75533	Q8IYB3
O75533	Q07955
O75533	Q96I25
O75533	Q12972
O75533	P08579
O75533	Q15427
O75533	P62318
O75533	Q8TAD8
O75533	P62306
O75533	P08621
O75533	O75643
O75533	Q16629
O75533	Q8IWZ8
O75533	Q86XP3
O75533	P62304
O75533	Q13243
Q8N448	P49757
Q9H8V3	Q9NPB6
Q9H8V3	Q96L33
Q9H8V3	P63000
Q9H8V3	P55317
Q9H8V3	Q7L0Q8
Q9H8V3	Q8IXI1
Q9H8V3	P17081
Q9H8V3	Q15669
Q9H8V3	Q9HBH0
Q9H8V3	P08134
Q9H8V3	Q8IXI2
Q9H8V3	P15153
Q9H8V3	P84095
Q9H8V3	P62745
Q9H8V3	P53350
Q9H8V3	O00212
Q9H8V3	P60763
Q9H8V3	P61586
Q08426	P40763
Q08426	Q07869
Q08426	O00206
Q08426	Q9Y6Y9
Q08426	P51617
Q08426	P48443
Q08426	Q15797
Q08426	P19525
Q08426	Q9H0E2
Q08426	P19793
Q08426	P28702
Q08426	P58753
Q08426	P05412
P51587	O43196
P51587	O60814
P51587	P15927
P51587	Q14565
P51587	Q99879
P51587	O14757
P51587	P19838
P51587	P57053
P51587	O15457
P51587	Q99877
P51587	P45983
P51587	O43542
P51587	Q9BXW9
P51587	P04637
P51587	Q93079
P51587	P06899
P51587	P22415
P51587	Q16778
P51587	Q9NVI1
P51587	Q9BWT6
P51587	O43502
P51587	P58876
P51587	P35244
P51587	P03372
P51587	P40692
P51587	P11802
P51587	P24941
P51587	P33778
P51587	Q99880
P51587	Q04206
P51587	P46736
P51587	Q13472
P51587	Q8NEM0
P51587	Q96A08
P51587	Q9UHC1
P51587	Q9NXR7
P51587	P27694
P51587	P21333
P51587	Q99728
P51587	Q9HB96
P51587	Q9P2W1
P51587	Q8N257
P51587	P38398
P51587	P14921
P51587	Q9NSU2
P51587	Q16695
P51587	P23527
P51587	Q9BX63
P51587	Q06609
P51587	P32519
O60925	P68371
O60925	Q9UHV9
O60925	Q71U36
O60925	P68366
O60925	Q9H4B7
O60925	Q9Y2X7
O60925	P04350
O60925	Q9BUF5
O60925	Q13885
O60925	Q9NQP4
O60925	P17987
O60925	Q13509
O60925	P68133
O60925	Q9BVA1
O60925	Q99471
O60925	P61758
O60925	Q16891
O60925	O15212
O60925	Q9BQE3
O94923	P34741
O94923	P35052
O94923	Q9Y625
O94923	P18827
O94923	O75487
O94923	P51654
O94923	P31431
O94923	P98160
O94923	O75056
O60683	P50542
O60683	P40855
O60683	O00623
O60683	P28328
Q9NX02	P29466
Q9NX02	Q9Y2Z0
Q9NX02	O15111
Q9NX02	Q99572
Q9NX02	Q9UNN5
Q9NX02	Q96RD7
P28749	P67775
P28749	Q14188
P28749	Q14186
P28749	Q96ST3
P28749	P24941
P28749	Q14457
P28749	P08047
P28749	O75182
P28749	Q01094
P28749	Q15022
P28749	Q9BUH8
P28749	Q15796
P28749	Q9UQ80
Q9UBW5	O15056
Q9UBW5	Q13492
Q9UBW5	O43426
Q9UBW5	P48454
Q9UBW5	Q9Y6I3
Q9UNM6	Q15369
Q9UNM6	P61289
Q9UNM6	Q13200
Q9UNM6	Q99460
Q9UNM6	Q9H936
Q9UNM6	P55036
Q9UNM6	Q15370
Q9UNM6	O00762
Q9UNM6	Q06323
Q9UNM6	Q13309
Q9UNM6	P0CG48
Q9UNM6	O95997
Q9UNM6	P51668
Q9UNM6	O00231
Q9UNM6	Q04864
Q9UNM6	O43242
Q9UNM6	P13995
Q9UNM6	P17980
Q9UNM6	P0CG47
Q9UNM6	P35998
Q9UNM6	P60900
Q9UNM6	P25786
Q9UNM6	P62979
Q9UNM6	P43686
Q9UNM6	O00232
Q9UNM6	P63208
Q9UNM6	Q92530
Q9UNM6	P62987
Q9UNM6	P62877
Q9UNM6	P48556
Q9UNM6	P62191
Q9UNM6	Q8NHY2
Q9UNM6	Q14997
Q9UNM6	Q04206
Q9UNM6	P62333
Q9UNM6	P25788
Q9UNM6	P07332
Q9UNM6	P62195
Q9UNM6	O00233
Q9UNM6	P82279
Q9UNM6	O00487
Q9UNM6	P51965
Q9UNM6	O14818
Q9UNM6	Q9UL46
O75604	P37088
O75604	P36776
O75604	Q9Y4K3
O75604	P51170
O75604	Q15834
O75604	Q9BUH8
O75604	Q9Y3B9
O75604	Q7L4P6
O75604	Q9UHD2
Q15648	P41235
Q15648	P10826
Q15648	Q96RN5
Q15648	Q93074
Q15648	Q99594
Q15648	P51449
Q15648	P01137
Q15648	Q15561
Q15648	Q9ULK4
Q15648	P36956
Q15648	Q86WQ0
Q15648	P19793
Q15648	P25208
Q15648	Q6STE5
Q15648	Q9Y5X4
Q15648	Q13503
Q15648	Q92731
Q15648	Q15466
Q15648	P04637
Q15648	Q92830
Q15648	P46937
Q15648	P08047
Q15648	P48443
Q15648	Q9UHV7
Q15648	Q86YN6
Q15648	Q13285
Q15648	Q9GZV5
Q15648	P20393
Q15648	Q9H944
Q15648	Q9NPJ6
Q15648	O60907
Q15648	Q15528
Q15648	Q9BUE0
Q15648	Q13133
Q15648	Q15562
Q15648	P22736
Q15648	Q15596
Q15648	Q9Y2X0
Q15648	P11473
Q15648	Q02556
Q15648	P15976
Q15648	P38398
Q15648	Q9Y3C7
Q15648	P10828
Q15648	P08833
Q15648	Q9UHY1
Q15648	O00482
Q15648	P10588
Q15648	Q12772
Q15648	Q07869
Q15648	Q96ST3
Q15648	P10275
Q15648	P23511
Q15648	Q96HR3
Q15648	O75448
Q15648	Q13952
Q15648	Q03181
Q15648	P28702
Q15648	P06401
Q15648	P10589
Q15648	O75586
Q15648	Q96RI1
Q15648	Q15788
Q15648	Q9Y618
Q15648	P35398
Q15648	P03372
Q15648	P55055
Q15648	Q15406
Q15648	P51843
Q15648	P04628
Q15648	Q9BZK7
Q15648	Q9NVC6
Q15648	Q9Y6Q9
Q15648	O75182
Q15648	P43354
Q15648	P37231
Q15648	O75469
Q15648	P08235
Q15648	P13631
Q15648	Q6P2C8
Q15648	Q14995
Q15648	Q16656
Q15648	Q14994
Q15648	P49116
Q15648	Q71F56
Q15648	O60244
Q15648	Q14686
Q15648	Q92753
Q15648	P01375
Q15648	P13056
Q15648	P28347
Q15648	O43513
Q15648	O75376
Q15648	Q00987
Q15648	Q9P086
Q15648	O00744
Q15648	Q96F24
Q99832	Q71U36
Q99832	Q9H4B7
Q99832	Q9UKA1
Q99832	Q9UKT8
Q99832	P51784
Q99832	Q86WA8
Q99832	Q9H1H9
Q99832	P04350
Q99832	Q13885
Q99832	Q15477
Q99832	Q9NQP4
Q99832	Q9UKT5
Q99832	Q13509
Q99832	P68363
Q99832	Q9BVG8
Q99832	Q9BVA1
Q99832	O00567
Q99832	O15212
Q99832	Q9BQE3
Q99832	Q9UHV9
Q99832	P68371
Q99832	P68366
Q99832	P50990
Q99832	Q9UKT7
Q99832	Q969U6
Q99832	P40227
Q99832	Q5XUX1
Q99832	O60925
Q99832	Q9NYA1
Q99832	Q9H0D6
Q99832	Q9BUF5
Q99832	P17987
Q99832	O95302
Q99832	Q969H0
Q99832	Q99471
Q99832	P61758
Q99832	Q9NRD1
P49427	P40337
P49427	Q96A44
P49427	O14543
P49427	O15524
P49427	P19474
P49427	Q9UNE7
P49427	Q7Z3V4
P49427	Q8IWV7
P49427	Q96BD6
P49427	Q7Z419
P49427	P0CG48
P49427	Q9H4P4
P49427	Q8N3Y1
P49427	Q9UKT5
P49427	P0CG47
P49427	Q9C026
P49427	Q96F44
P49427	Q5T4S7
P49427	A0AVT1
P49427	Q9GZZ9
P49427	Q8TDB6
P49427	Q96EF6
P49427	Q96BH1
P49427	Q969K3
P49427	P63208
P49427	Q7Z6Z7
P49427	P46527
P49427	O95714
P49427	Q5VTB9
P49427	Q99619
P49427	O43164
P49427	Q9Y2M5
P49427	Q9HAU4
P49427	Q969Q1
P49427	Q9HCE7
P49427	Q8TBC4
P49427	Q5T447
P49427	Q6UWE0
P49427	Q8WVD3
P49427	Q13616
P49427	Q96L50
P49427	Q13618
P49427	Q96J02
P49427	Q8N6D2
P49427	Q9UK99
P49427	Q9Y4B6
P49427	Q96PU5
P49427	Q969H0
P49427	Q9BYM8
P49427	Q15369
P49427	Q9UHC7
P49427	Q93034
P49427	Q9H4M3
P49427	O60291
P49427	Q15370
P49427	Q5XPI4
P49427	Q6ZNA4
P49427	Q15345
P49427	Q14139
P49427	Q8IWV8
P49427	O94972
P49427	Q86Y13
P49427	Q9UKB1
P49427	Q8NI29
P49427	P62979
P49427	Q9Y252
P49427	Q9UK22
P49427	Q05516
P49427	Q8NG27
P49427	Q96PM5
P49427	P62987
P49427	Q15386
P49427	Q9UM11
P49427	Q13617
P49427	Q9Y6I7
P49427	Q13049
P49427	Q9P2J3
P49427	O60260
P49427	Q9H0M0
P49427	Q6ZMZ0
P49427	P41226
P49427	P46934
P49427	Q14999
P49427	P78317
P49427	Q9H2C0
P49427	Q7L5Y6
P49427	Q05086
P49427	Q9P2N7
P49427	P22314
P49427	Q14669
P49427	Q9UJP4
P49427	Q9NRD1
P49427	Q14145
Q14210	P17947
P02452	P23229
P02452	P18206
P02452	P10244
P02452	P05549
P02452	P31431
P02452	Q14112
P02452	Q8IVL5
P02452	P26010
P02452	P05107
P02452	P17301
P02452	Q05397
P02452	P08047
P02452	P49023
P02452	Q02809
P02452	Q9NVD7
P02452	P07237
P02452	P13612
P02452	O43915
P02452	P08651
P02452	Q9HBI1
P02452	P05556
P02452	Q02388
P02452	P21757
P02452	O43897
P02452	O60568
P02452	Q32P28
P02452	P18827
P02452	P08648
P02452	P02751
P02452	P08514
P02452	O00469
P02452	P53708
P02452	P20701
P02452	P38570
P02452	P08123
P02452	Q9UKX5
P02452	P18084
P02452	Q02447
P02452	P11215
P02452	Q8N3F8
P02452	P19838
P02452	Q8IYK4
P02452	Q13683
P02452	P50454
P02452	P20702
P02452	O75369
P02452	P84022
P02452	P06756
P02452	Q9UKZ9
P02452	Q7Z4I7
P02452	Q15796
P02452	Q14289
P02452	Q9Y6L7
P02452	Q8IVL6
P02452	P48059
P02452	Q13485
P02452	P06241
P02452	P56199
P02452	O75718
P02452	P16144
P02452	Q04206
P02452	Q9HCN6
P02452	Q8NBJ5
P02452	Q9Y490
P02452	P05412
P02452	P21333
P02452	P18564
P02452	Q13349
P02452	P49711
P02452	P35916
P02452	P23284
P02452	P26006
P02452	Q13797
P02452	P05106
P02452	Q15113
Q8N6I1	Q13127
Q8N6I1	Q16656
Q8N6I1	Q8N140
Q8N6I1	Q15796
Q8N6I1	Q13485
Q8N6I1	P84022
Q99460	Q15369
Q99460	P61289
Q99460	Q13200
Q99460	P48556
Q99460	P51665
Q99460	Q8NHY2
Q99460	Q15370
Q99460	O00762
Q99460	Q04206
Q99460	Q14997
Q99460	Q06323
Q99460	Q13309
Q99460	P0CG48
Q99460	O95997
Q99460	P51668
Q99460	Q04864
Q99460	O43242
Q99460	P0CG47
Q99460	P62195
Q99460	O00233
Q99460	P62979
Q99460	P63208
Q99460	P51965
Q99460	Q92530
Q99460	Q9UL46
Q99460	P62987
Q99460	P62877
Q6ZMB0	Q685J3
Q6ZMB0	Q9HC84
Q6ZMB0	Q8TAX7
Q6ZMB0	Q8N307
Q6ZMB0	Q7Z5P9
Q6ZMB0	Q8WXI7
Q6ZMB0	Q6W4X9
Q6ZMB0	P98088
Q6ZMB0	Q5SSG8
Q6ZMB0	P15941
Q6ZMB0	Q99102
Q6ZMB0	Q02817
Q6ZMB0	Q96DR8
Q6ZMB0	Q9H3R2
Q6ZMB0	Q9UKN1
P35913	O75916
P35913	P18545
Q9H4X1	P06493
Q9H4X1	P31749
P61247	Q9H1J1
P61247	P37108
P61247	P62753
P61247	P67812
P61247	Q92900
P61247	P46782
P61247	P20226
P61247	Q9BZI7
P61247	Q9Y5M8
P61247	P61011
P61247	Q9HAU5
P61247	P60059
P61247	P43308
P61247	O76094
P61247	Q9BY50
P61247	P62987
P61247	P08865
P61247	P62701
P61247	Q96Q15
P61247	P60468
P61247	Q15005
P61247	Q8ND04
P61247	Q9H0W8
P61247	P49458
P61247	P22090
P61247	P51571
P61247	Q9Y6A9
P61247	Q92540
P61247	P35638
P61247	P08240
P61247	P09874
P61247	Q86US8
P61247	P61619
P61247	P62081
P61247	P23396
P61247	P21675
P61247	Q9UPR3
P61247	P09132
P61247	Q9UHB9
P61247	P61009
P61247	P43307
P61247	P62241
P61247	Q15629
P61247	Q9UNL2
Q9HD67	Q8TF74
Q9HD67	P62158
Q9HD67	O43516
Q9HD67	P63000
Q9HD67	Q9Y6W5
Q9HD67	Q9Y2A7
Q9HD67	O95631
Q9HD67	Q92859
Q9HD67	Q9UPY6
Q9HD67	P27482
Q9HD67	O00401
Q9HD67	Q9NZQ3
Q9HD67	P16333
Q9HD67	P42768
Q9HD67	Q92558
Q9NTI5	Q96EA4
Q9NTI5	O14980
Q9NTI5	O60216
Q9NTI5	Q8WVK7
Q9NTI5	Q14738
Q9NTI5	P49792
Q9NTI5	Q562F6
Q9NTI5	P30154
Q9NTI5	P42677
Q9NTI5	O43264
Q9NTI5	Q6P1K2
Q9NTI5	Q15172
Q9NTI5	Q96EE3
Q9NTI5	P55735
Q9NTI5	Q9H900
Q9NTI5	P53350
Q9NTI5	O95229
Q9NTI5	Q14683
Q9NTI5	P30153
Q9NTI5	Q5FBB7
Q9NTI5	Q7L7X3
Q9NTI5	Q15173
Q9NTI5	Q16537
Q9NTI5	P67775
Q9NTI5	Q8NBT2
Q9NTI5	Q9HBM1
Q9NTI5	Q96BD8
Q9NTI5	P46060
Q9NTI5	P62714
Q9NTI5	Q9P258
Q9NTI5	Q13362
Q9NTI5	P36873
O14981	P20226
Q6ULP2	O75843
Q15131	P37275
Q15131	P15036
Q16526	Q9Y478
Q16526	Q13131
Q16526	Q9UGI9
Q16526	O15055
Q16526	O43741
Q16526	P48730
Q16526	P0CG48
Q16526	P56645
Q16526	Q9UNS1
Q16526	P0CG47
Q16526	P49674
Q16526	Q9BQ66
Q16526	P54619
Q16526	P62979
Q16526	Q9UGJ0
Q16526	O15534
Q16526	P62987
Q16526	P54646
Q16526	P20393
P29320	P07947
P29320	P08631
P29320	P20936
P29320	P52798
P29320	P98172
P29320	P46108
P29320	P06239
P29320	P09769
P29320	P07948
P29320	P52797
P29320	P61586
Q9Y6R0	Q9NYJ8
O00329	P43403
O00329	Q13114
O00329	P05129
O00329	P16885
O00329	Q00722
O00329	P61224
O00329	Q13009
O00329	Q9NQ66
O00329	P17252
O00329	Q9UKM9
O00329	Q05397
O00329	P20936
O00329	P27986
O00329	Q05513
O00329	O15056
O00329	Q9C004
O00329	P43405
O00329	Q07890
O00329	P19174
O00329	P12931
O00329	Q8N3E9
O00329	Q9UKW4
O00329	P52735
O00329	Q9UJF2
O00329	P01112
O00329	O94806
O00329	Q92529
O00329	Q8TBX8
O00329	P48736
O00329	Q01970
O00329	P15153
O00329	Q06124
O00329	P48426
O00329	P78356
O00329	P42224
O00329	P24723
O00329	Q15139
O00329	Q9BZL6
O00329	Q14765
O00329	P10301
O00329	O00463
O00329	P60484
O00329	O60331
O00329	P04049
O00329	P63000
O00329	Q15147
O00329	O43426
O00329	P29353
O00329	Q04759
O00329	P62070
O00329	P63104
[truncated: 152,164 more rows]
