# Supplementary material for: Computational analysis of multimorbidity between asthma, eczema and rhinitis
Source: PLoS One. 2017 Jun 9;12(6):e0179125. doi: 10.1371/journal.pone.0179125 (PMC5466323; doi:10.1371/journal.pone.0179125)
Supplement: S2 Table — Disease-associated proteins (provided as UniProt accessions), are separated by a semicolon. The network column indicates whether the disease has at least one associated protein present in then FIN (1) or not (0). (XLS) [file pone.0179125.s013.xls]

## Sheet: Sheet1
disease	associated proteins (UniProt accession)	network
acquired angioedema	P01042;P05155	1
acquired immunodeficiency syndrome	P01562;P01579	1
addison disease	P33076	1
agammaglobulinemia	P11912;P15391;P15814;Q8IWT6	1
agammaglobulinemia 4, autosomal recessive	Q8WV28	1
agammaglobulinemia 6, autosomal recessive	P40259	1
aicardi-goutieres syndrome	P55265;Q5TBB1;Q9NSU2;Q9Y3Z3	1
aicardi-goutieres syndrome 3	Q8TDP1	0
aicardi-goutieres syndrome 4	O75792	0
aicardi-goutieres syndrome 5	Q9Y3Z3	1
aids-related kaposi sarcoma	P10415	1
aids-related opportunistic infections	P01730	1
alpha/beta t-cell lymphopenia with gamma/delta t-cell expansion, severe cytomegalovirus infection, a	P15918	1
alveolitis, extrinsic allergic	P04179	1
anaphylaxis	P01042;Q15722;Q96P20	1
anemia, hemolytic, autoimmune	Q13336	0
angioedema	P00750;P01911;P01912;P01920;P02768;P04440;Q29974	1
angioedemas, hereditary	P00748;P01042;P05155	1
arthritis, juvenile	P07358	1
arthritis, rheumatoid	O00221;O00585;O75626;O75746;O95267;P01375;P01579;P01584;P01589;P01906;P01911;P01912;P02741;P02774;P04040;P04141;P04179;P04440;P05164;P05231;P06127;P06729;P06733;P07339;P07766;P08253;P08567;P08575;P08887;P09917;P10114;P10747;P12318;P12429;P14174;P14317;P14598;P14784;P15692;P16410;P17706;P19875;P19878;P21580;P21810;P22301;P23771;P25098;P25942;P26196;P27169;P28358;P29597;P30411;P33076;P35354;P35453;…	1
asthma	O75762;O95715;O95760;P00749;P01137;P01303;P01375;P01584;P01909;P01911;P01912;P01920;P02818;P04040;P04440;P05089;P05091;P05112;P05113;P05305;P05362;P07550;P08571;P08727;P09211;P09238;P09488;P09601;P09874;P09917;P10242;P10415;P11684;P12724;P13500;P13501;P14780;P15514;P15559;P15692;P17693;P18510;P24821;P29460;P35225;P35228;P35625;P50135;P51671;P67775;P78540;P80365;Q01638;Q07343;Q08462;Q08499;Q13093;…	1
asthma, aspirin-induced	P04440;P21731;P35354;P43119;P51677;Q15063;Q16873;Q9NS75;Q9Y271;Q9Y5Y4	1
asthma-related traits, susceptibility to, 2	Q6W5P4	0
asthma-related traits, susceptibility to, 5	Q9Y616	1
asthma-related traits, susceptibility to, 7	P36222	1
ataxia telangiectasia	Q13315	1
autoimmune diseases	P00451;P00738;P01579;P02489;P02776;P02790;P04179;P05112;P05231;P09871;P0C0L4;P0C0L5;P10745;P10747;P16284;P19438;P22087;P25445;P31994;P38646;P43320;P49682;Q13702;Q16552;Q96EB6;Q9GZX7;Q9HAT2	1
autoimmune disease, susceptibility to, 1	Q9UJU5	1
autoimmune lymphoproliferative syndrome	P01111;P25445;Q14790	1
autoimmune lymphoproliferative syndrome, type iia	Q92851	1
autoimmune polyendocrinopathy syndrome, type 1	O43918	1
band-like calcification with simplified gyration and polymicrogyria	Q16625	1
bare lymphocyte syndrome 2	O00287;O14593;P33076;P48382	1
bare lymphocyte syndrome, type i	O15533;Q03518;Q03519	1
bruton type agammaglobulinemia	Q06187	1
burkitt lymphoma	O14497;O95954;P01106;P07949;P11498;P15923;P27986;P40424;P51532;Q02535;Q14344;Q92526;Q9BXA9;Q9BXH1	1
cd8 deficiency, familial	P01732	1
chediak-higashi syndrome	Q99698	1
combined cellular and humoral immune defects with granulomas	P15918;P55895	1
common variable immunodeficiency	O14836;P11836;P15391;P60033;Q96RJ3;Q9Y6W8	1
complement component 2 deficiency	P06681	1
complement component 4, partial deficiency of	P05155	1
complement component 5 deficiency	P01031	1
complement component 6 deficiency	P13671	1
complement component 7 deficiency	P10643	1
complement component 8 deficiency, type i	P07357	1
complement component 8 deficiency, type ii	P07358	1
complement component c1r/c1s deficiency	P00736	1
congenital myasthenic syndrome with episodic apnea	P28329	0
dermatitis, allergic contact	O14508;O15117;O15229;O15524;O75015;P00488;P00750;P01375;P01579;P01583;P01589;P04234;P04798;P05112;P05113;P10415;P11169;P11215;P11309;P13284;P15036;P16581;P16671;P19875;P21673;P22004;P22301;P22897;P24001;P25098;P28845;P41597;P43490;P50221;P53634;P60568;P63313;P98066;Q01650;Q03060;Q05195;Q08116;Q13162;Q13637;Q14314;Q14790;Q14980;Q16236;Q16602;Q16769;Q16831;Q6PCB8;Q7L266;Q8N139;Q8WV24;Q8WWN9;Q92982;…	1
dermatitis, atopic	O00175;O00626;O95497;O95498;O95760;P01579;P01584;P02778;P05109;P05112;P05113;P05231;P13501;P16278;P16581;P20930;P22301;P35225;P45983;P49682;P51671;P51677;P51681;Q07869;Q70YC5;Q76M96;Q7Z589;Q8IZI9;Q8TC94;Q92583;Q969D9;Q9BXL7	1
dermatitis, atopic, 1	P20930	1
dermatitis, atopic, 2	P20930	1
dermatitis, atopic, 4	O14543	1
diabetes mellitus, insulin-dependent, 10	P01589	1
diabetes mellitus, insulin-dependent, 12	P16410	1
diabetes mellitus, insulin-dependent, 19	Q9BYX4	1
diabetes mellitus, insulin-dependent, 2	P01308	1
diabetes mellitus, insulin-dependent, 20	P20823	1
diabetes mellitus, insulin-dependent, 21	Q8N103	0
diabetes mellitus, insulin-dependent, 22	P51681	1
diabetes mellitus, insulin-dependent, 5	Q6EEV6	1
diabetes mellitus, type 1	O43316;P00450;P00738;P00973;P01579;P01589;P01920;P02741;P08172;P09668;P20823;P22301;P29474;P29475;P80365;Q04759;Q07108;Q09428;Q14573;Q14654;Q8NEV9;Q9BXI9;Q9BYV9;Q9BZD2;Q9BZS1;Q9NYY1;Q9UHD0;Q9UQQ2;Q9Y2R2	1
diffuse cerebral sclerosis of schilder	P54098	1
drug eruptions	P01042;P01889;P01920;P02647;P02655;P02656;P02766;P04440;P04798;P05112;P05164;P05181;P09917;P0C0L4;P0C0L5;P12319;P20366;P30466;P42898;Q14116	1
drug hypersensitivity	O00175;O00220;P01375;P01889;P01911;P01912;P05112;P09211;P09488;P10144;P11245;P11712;P12319;P12821;P12872;P20366;P22301;P23219;P24557;P29274;P30273;P30466;P30542;P34931;P35225;P48023;P50135;P51671;Q15063;Q16873;Q29974;Q92887;Q96P20;Q9NS75;Q9Y271	1
dysautonomia, familial	O95163	1
early-onset ataxia with oculomotor apraxia and hypoalbuminemia	Q7Z2E3	1
ectodermal dysplasia, anhidrotic, with immunodeficiency, osteopetrosis, and lymphedema	Q9Y6K9	1
ectodermal dysplasia, anhidrotic, with t-cell immunodeficiency, autosomal dominant	P25963	1
ectodermal dysplasia, hypohidrotic, with immune deficiency	Q9Y6K9	1
encephalomyelitis, autoimmune, experimental	P02686;Q07869;Q13191;Q16653	1
encephalopathy, acute, infection-induced, susceptibility to, 3	P49792	1
eosinophilic esophagitis	Q969D9;Q9Y258	1
familial cold autoinflammatory syndrome 1	Q96P20	1
food hypersensitivity	Q8IZI9;Q96P20	1
giant lymph node hyperplasia	P05231	1
glomerulonephritis, iga	O75888;P01019;P01137;P01833;P02745;P12821;P14151;P16581;Q01523;Q02985;Q03591;Q9UJ37	1
glomerulonephritis, membranoproliferative	P02745;P02768;P08603;P27169;Q969D9	1
glomerulonephritis, membranous	P01909;P01911;P01912;P02647;P02768;P10253;Q29974	1
glomerulopathy with fibronectin deposits	P02751	1
graft vs host disease	O75795;P01579;P42898;Q16552	1
granuloma, foreign-body	Q9NR96	1
granuloma, plasma cell	P49792;Q9UM73	1
granuloma, respiratory tract	P04179;Q9NR96	1
granulomatous disease, chronic	P04839;P11413;P13498	1
granulomatous disease, chronic, autosomal recessive, cytochrome b-negative	P13498	1
granulomatous disease, chronic, autosomal recessive, cytochrome b-positive, type i	P14598	1
granulomatous disease, chronic, autosomal recessive, cytochrome b-positive, type ii	P19878	1
granulomatous disease, chronic, x-linked	P04839	1
graves disease	O00584;P02774;P16410;P16473;Q14865;Q96P31;Q9BYX4;Q9NY97	1
graves ophthalmopathy	O00767;P00403	1
griscelli syndrome type 2	P51159	1
hashimoto disease	P09871;P16410	1
hepatic venoocclusive disease with immunodeficiency	Q9HB58	1
hepatitis, autoimmune	P01137;P01579;P05062;P05112;P05113;P05231;P09341;P09871;P13500;P13501;P22301;P35225;P41159;P60568;Q14116;Q9GZX6	1
hereditary angioedema type iii	P00748	1
hereditary angioedema types i and ii	P05155;P09871	1
hereditary sensory and autonomic neuropathies	P01138;P04629;P26358;Q9H6L5	1
hiv-associated lipodystrophy syndrome	O75844;P02545	1
hiv infections	O00299;O43242;O95373;O95817;P00738;P01579;P01589;P01889;P02647;P02768;P04792;P06734;P07900;P07948;P10147;P10321;P10747;P10809;P11226;P11831;P11926;P13500;P16619;P17980;P22301;P23246;P23284;P24394;P24522;P25024;P25490;P25789;P28066;P28070;P30466;P38646;P38936;P40306;P43487;P43629;P48061;P48556;P48643;P49238;P49368;P51671;P51677;P51858;P52565;P52566;P55884;P56270;P56537;P60568;P60842;P60900;P60953;…	1
hiv seropositivity	P02768	1
hiv wasting syndrome	P01375;P01583;P01584;P05231	1
hodgkin disease	O15519;P09211;P18031;P22309;P23771;P25963;P28908;Q04864	1
hydrops fetalis	Q6UXH8	0
hyper-ige recurrent infection syndrome, autosomal dominant	P40763	1
hyper-igm immunodeficiency syndrome	P13051;P25942;Q9GZX7	1
hyper-igm immunodeficiency syndrome, type 1	P29965	1
hypersensitivity	O00175;P00738;P01042;P01137;P01375;P01579;P01584;P01889;P02768;P02776;P04798;P05107;P05112;P05231;P09341;P10145;P10147;P10451;P13236;P13500;P14778;P14784;P16109;P19438;P20333;P20366;P27930;P29466;P29965;P30466;P32246;P35225;P40189;P41597;P42830;P42898;P49682;P51671;P51686;P78423;P78556;P80075;P80098;Q01344;Q02413;Q07325;Q14116;Q15746;Q16552;Q8NE71;Q92583;Q99731;Q9BUD6;Q9NZQ7	1
hypersensitivity, delayed	P02768	1
hypersensitivity, immediate	O95760;P05112;P06734;P22301;P35225;Q13093;Q14116	1
hypogammaglobulinemia and isolated growth hormone deficiency, x-linked	Q06187	1
iga deficiency	Q9BYX4	1
ige responsiveness, atopic	P16109;P24394;Q13093;Q96D42;Q9HBE5;Q9NQ38;Q9UIL8	1
immune complex diseases	O00187;P02745	1
immune dysfunction with t-cell inactivation due to calcium entry defect 1	Q96D31	1
immune dysfunction with t-cell inactivation due to calcium entry defect 2	Q13586	1
immune system diseases	P01189;P05089;P34972;Q9P2K8	1
immunoblastic lymphadenopathy	P48735;P61586;Q6N021;Q9Y6K1	1
immunodeficiency-centromeric instability-facial anomalies syndrome 1	Q9UBC3	1
immunodeficiency due to defect in cd3-zeta	P20963	1
immunodeficiency due to defect in mapbp-interacting protein	Q9Y2Q5	1
immunodeficiency without anhidrotic ectodermal dysplasia	Q9Y6K9	1
immunodysregulation, polyendocrinopathy, and enteropathy, x-linked	Q9BZS1	1
immunoglobulin a deficiency 2	O14836	1
immunologic deficiency syndromes	O75636;P00746;P01024;P01031;P02746;P02748;P07357;P07358;P07766;P08603;P0C0L4;P16671;P43403;P48357;Q13936;Q9UBC3	1
interleukin 2 receptor, alpha, deficiency of	P01589	1
invasive pneumococcal disease, recurrent isolated, 1	P58753;Q9NWZ3	1
invasive pneumococcal disease, recurrent isolated, 2	Q9Y6K9	1
irak4 deficiency	Q9NWZ3	1
job syndrome	P01579;Q8NF50	1
kernicterus	P22309	1
leukemia, hairy cell	Q02750	1
leukemia, lymphocytic, chronic, b-cell	O14788;O75533;O94887;P02786;P04637;P05231;P06127;P06746;P10415;P11473;P13612;P24385;P35354;P42898;P59901;Q08999;Q13315;Q13342;Q13362;Q13794;Q15306;Q16769;Q92547;Q969Q4;Q96LC9;Q99572;Q9BZB8;Q9BZL6;Q9UHD0;Q9UJU2;Q9Y6Q6	1
leukemia, lymphoid	O14746;Q03112;Q03164;Q13465;Q8WWN9;Q96KA5;Q9GZX7;Q9NUX5	1
leukemia-lymphoma, adult t-cell	P01579;P05112;P22004;P22301;P31314;P60568;Q15554;Q9BZS1	1
leukemia, t-cell	P17706;P25791;P25800;P40763	1
leukocyte-adhesion deficiency syndrome	P05107	1
leukocyte adhesion deficiency type 1	P05107	1
leukocyte adhesion deficiency, type iii	Q86UX7	1
lig4 syndrome	P49917	1
lupus erythematosus, systemic	O60602;O75626;P00751;P01236;P01909;P01911;P01912;P02741;P02745;P05112;P05231;P08637;P0C0L4;P10909;P11215;P12318;P12429;P14921;P20023;P20702;P21580;P22301;P23510;P24855;P29460;P31994;P35354;P41240;P48023;P51451;Q13422;Q13568;Q13609;Q14765;Q15025;Q15116;Q29974;Q6BDS2;Q7Z7A4;Q86VZ6;Q8IV61;Q8NDB2;Q9BYX4;Q9H244;Q9HBE4;Q9NSU2;Q9P1Y6;Q9UQQ2;Q9Y2R2	1
lupus nephritis	O75015;P05155;P08253;P14780	1
lymphangioleiomyomatosis	O43915;P49815;Q14469;Q92574;Q9Y219	1
lymphoma	P01111;P01116;P07099;P15153;P27169;P40692;P42771;P42772;P42898;P46531;P60484;Q12792;Q13422;Q8N726;Q99707;Q9C0K0	1
lymphoma, b-cell	P01111;P18031;P35354;Q96CJ1	1
lymphoma, extranodal nk-t-cell	O15519	1
lymphoma, follicular	O14686;P04818;P10415;P21580;P42898;Q15910;Q92793;Q99707;Q99836;Q9UH73	1
lymphoma, large b-cell, diffuse	O00329;O14686;O15530;O94979;P04040;P04179;P06493;P08183;P08294;P10415;P23443;P30048;P40259;P42336;P42338;P42771;P48736;P61769;Q00610;Q13162;Q13309;Q15910;Q5C9Z4;Q8N726;Q9H3M7;Q9UDY8;Q9UM73	1
lymphoma, large-cell, anaplastic	P07900;P40763;Q15672;Q9UM73	1
lymphoma, mantle-cell	P06730;P35222;P42345;P49841;P56703;Q13541;Q52LW3;Q9GZT5	1
lymphoma, non-hodgkin	P01911;P01912;P02786;P04818;P05181;P07099;P10415;P14222;P34896;P35520;P42898;Q05932;Q29974;Q92698;Q92851;Q93088	1
lymphoma, t-cell	P37231;P41182	1
lymphoma, t-cell, cutaneous	Q07812;Q07820	1
lymphoma, t-cell, peripheral	P06241;P19256;P48735;P61586;P61769;Q13315;Q6N021;Q9Y6K1	1
lymphopenia	P01584;P13232	1
lymphoproliferative disorders	O60880;P01579;Q16552	1
lymphoproliferative syndrome, ebv-associated, autosomal, 1	Q08881	1
lymphoproliferative syndrome, x-linked, 2	P98170	1
masp2 deficiency	O00187	1
mevalonate kinase deficiency	Q03426	1
muckle-wells syndrome	Q96P20	1
multiple chemical sensitivity	P04179	1
multiple myeloma	O14836;O95931;P04179;P04439;P04792;P05231;P07099;P09486;P09874;P10415;P12272;P13500;P15559;P15941;P24385;P30443;P30711;P42081;P42771;P49917;P62324;P78395;Q07817;Q07820;Q12983;Q15306;Q8N726;Q96C45	1
multiple sclerosis	O43557;O60333;P01589;P01903;P01911;P01912;P01920;P02649;P04440;P05362;P06276;P08575;P13232;P16581;P16871;P19256;P19320;P19438;P21580;P25063;P25942;P29459;P29597;P30203;P33076;Q02556;Q13191;Q14765;Q15116;Q29974;Q99572	1
multiple sclerosis, relapsing-remitting	P02649	1
myasthenia gravis	O15146;P00751;P01889;P04440;P25445;P30466	1
myd88 deficiency	Q99836	1
neuromyelitis optica	P02686;P14136;P55087	1
neuropathy, hereditary sensory and autonomic, type ia	O15269	1
neuropathy, hereditary sensory and autonomic, type ic	O15270	1
neuropathy, hereditary sensory and autonomic, type iia	Q9H4A3	1
neuropathy, hereditary sensory and autonomic, type iib	Q9H6L5	0
neutrophil immunodeficiency syndrome	P15153	1
noonan syndrome-like disorder with loose anagen hair	Q9UQ13	1
noonan syndrome-like disorder with or without juvenile myelomonocytic leukemia	P22681	1
osteopetrosis, autosomal recessive 7	Q9Y6Q6	1
peanut hypersensitivity	P35869	1
pemphigoid, bullous	P10145	1
pemphigus	P01024	1
phagocyte bactericidal dysfunction	P11413	0
polyendocrinopathies, autoimmune	O43918	1
precursor b-cell lymphoblastic leukemia-lymphoma	P15923;P23771;P40763;P41212;Q01196;Q02548;Q13422;Q6VMQ6;Q8IWI9;Q9HC73	1
precursor cell lymphoblastic leukemia-lymphoma	P00519;P04637;P06400;P07099;P08631;P11245;P11274;P15559;P18887;P42771;P42898;P49902;Q13422;Q14865;Q15744;Q86VZ1;Q8N726;Q9GZV8;Q9HC73;Q9NWQ8;Q9UBK8;Q9UKS7;Q9UKT9	1
precursor t-cell lymphoblastic leukemia-lymphoma	O75175;P10242;P16871;P17542;P17706;P25791;P25800;P27635;P31314;P42345;P46531;P46777;Q8IWS0;Q969H0;Q9C0K0;Q9UNQ0	1
purpura, schoenlein-henoch	P01024	1
purpura, thrombocytopenic, idiopathic	Q76LX8	1
purpura, thrombotic thrombocytopenic	P07204;P10646;P13726;Q76LX8	1
respiratory hypersensitivity	O00206;P01375;P05112;P05231;P29350;P35367;P40933;P51671;P51677;P80075;Q15043;Q6P5W5;Q9NY26	1
reticular dysgenesis	P54819	1
reticuloendotheliosis, familial, with eosinophilia	P15918;P55895;Q96SD1	1
rheumatoid arthritis, systemic juvenile	P05231;P14174	1
rhinitis, allergic, perennial	P02768	1
rhinitis, allergic, seasonal	P01037	0
riddle syndrome	Q8IYW5	1
sarcoidosis	P01137;P01911;P01912;P04179;P04440;P50995;Q14116;Q29974;Q9HC29	1
sarcoidosis, early-onset	Q9HC29	1
schimke immunoosseous dysplasia	Q9NZC9	1
serum sickness	P02768	1
severe combined immunodeficiency	P04234;P07766;P43403;P54819	1
severe combined immunodeficiency, autosomal recessive, t cell-negative, b cell-negative, nk cell-pos	P15918;P55895	1
severe combined immunodeficiency, autosomal recessive, t cell-negative, b cell-positive, nk cell-neg	P04234;P16871	1
severe combined immunodeficiency, autosomal recessive, t cell-negative, b cell-positive, nk cell-pos	P04234;P07766;P08575;P16871	1
severe combined immunodeficiency due to adenosine deaminase deficiency	P00813	1
severe combined immunodeficiency with microcephaly, growth retardation, and sensitivity to ionizing	Q9H9Q4	1
severe combined immunodeficiency with sensitivity to ionizing radiation	Q96SD1	1
sjogren's syndrome	O75626;O95997;P12318;P21580;P29459;P52824;P78347;Q14765;Q15025;Q5VVH5;Q8WWQ0;Q9NZM3	1
spondyloenchondrodysplasia	P13686	1
stevens-johnson syndrome	P01889;P04439;P10321;P14174;P30443;P30466;P35228	1
t cell immunodeficiency primary	P43403	1
thyroiditis, autoimmune	P01266;P16473;Q96P31;Q9P243	1
thyrotoxic periodic paralysis, susceptibility to, 1	Q13698	1
t-lymphocytopenia	P51692	1
tn syndrome	Q96EU7	1
tyrosine kinase 2 deficiency	P29597	1
urticaria	P01137;P01375;P01584;P01911;P01912;P01920;P02768;P04440;P05164;P05362;P09488;P09917;P12319;P16581;P19320;P50135;Q14116;Q29974	1
uveomeningoencephalitic syndrome	P01563	1
vitiligo-associated multiple autoimmune disease susceptibility 1	Q9C000	1
whim syndrome	P61073	1
wiskott-aldrich syndrome	P42768	1
wolcott-rallison syndrome	Q9NZJ5	1
wolfram syndrome	O76024	1
x-linked combined immunodeficiency diseases	P31785	1
