# Supplementary material for: Computational analysis of multimorbidity between asthma, eczema and rhinitis
Source: PLoS One. 2017 Jun 9;12(6):e0179125. doi: 10.1371/journal.pone.0179125 (PMC5466323; doi:10.1371/journal.pone.0179125)
Supplement: S3 Table — Pathway-associated proteins (provided as UniProt accessions) and interactions between pathway-associated proteins are separated by a semicolon. (XLS) [file pone.0179125.s014.xls]

## Sheet: Sheet1
pathway	associated proteins (UniProt accession)	Interactions
ADP-Ribosylation Factor	O43150;O43739;P09497;P24390;P33947;P53621;P80108;P84077;Q15438;Q8N6T3;Q92538;Q99418;Q9NP61;Q9Y6D5;Q9Y6D6	O43150-P09497;O43150-P24390;O43150-P33947;O43150-P53621;P09497-P24390;P09497-P33947;P09497-P53621;P09497-P80108;P09497-Q92538;P24390-P84077;P53621-P24390;P53621-P33947;P53621-P80108;P53621-Q92538;P80108-P24390;P80108-P33947;P84077-O43739;P84077-P09497;P84077-P53621;P84077-Q15438;P84077-Q8N6T3;P84077-Q92538;Q8N6T3-P09497;Q8N6T3-P24390;Q8N6T3-P53621;Q99418-P84077;Q9NP61-P09497;Q9NP61-P24390;Q9NP61-…
AKAP95 role in mitosis and chromosome dynamics	O43823;P06493;P13861;P14635;P17844;P22694;P31323;P67775;Q15021	O43823-P13861;O43823-P17844;P06493-P31323;P06493-P67775;P06493-Q15021;P13861-P31323;P14635-P06493;P14635-P13861;P14635-P31323;P14635-P67775;P14635-Q15021;P22694-P13861;P22694-P31323
AKT Signaling Pathway	O14920;O15111;O15530;O43524;P01241;P07900;P10912;P19838;P25963;P27986;P31749;P42336;P48023;P48736;P55211;P67775;P98177;Q04206;Q04917;Q12778;Q92934;Q9Y6K9	O14920-O15530;O14920-P07900;O14920-P19838;O14920-P25963;O14920-Q04206;O15111-O14920;O15111-O15530;O15111-O43524;O15111-P07900;O15111-P48023;O15111-Q04206;O15530-P27986;O15530-P31749;O15530-P42336;O15530-P48736;O15530-P67775;O15530-Q04917;O43524-O14920;O43524-P98177;P01241-P10912;P07900-O15530;P07900-P27986;P07900-P42336;P10912-P27986;P19838-O15111;P19838-P25963;P19838-P27986;P19838-P42336;P19838-…
ALK in cardiac myocytes	O14640;O15169;O43318;O43541;O95393;P01137;P04628;P10600;P12643;P12644;P15336;P18075;P20823;P25054;P35222;P36894;P36897;P37173;P43694;P49841;P52952;P61812;Q03167;Q04771;Q06413;Q13253;Q13485;Q13873;Q15797;Q99717;Q9H2X0;Q9UP38	O14640-O15169;O14640-P04628;O14640-P25054;O14640-P35222;O14640-P49841;O14640-Q13485;O14640-Q9UP38;O15169-P25054;O15169-P35222;O15169-P36897;O15169-P37173;O15169-P49841;O43318-P04628;O43318-P37173;O43541-O43318;O43541-P01137;O43541-P10600;O43541-Q04771;O43541-Q15797;O95393-P36894;O95393-P36897;O95393-P37173;O95393-P52952;O95393-Q13253;O95393-Q13873;P01137-P04628;P10600-P36897;P10600-P37173;P12643-…
ATM Signaling Pathway	O14757;O15350;O60934;O96017;P00519;P04637;P05412;P19838;P24522;P25963;P38398;P38936;P45983;P49959;Q00987;Q04206;Q06609;Q13315;Q92878;Q99708	O14757-O15350;O14757-P04637;O14757-P38398;O14757-Q06609;O15350-P38936;O15350-Q00987;O60934-P38398;O60934-P49959;O60934-Q99708;O96017-O15350;O96017-O60934;O96017-P38398;O96017-P49959;O96017-Q00987;O96017-Q92878;P00519-O15350;P00519-P05412;P00519-Q00987;P00519-Q06609;P04637-O96017;P04637-P00519;P04637-P25963;P04637-P38398;P04637-P38936;P04637-Q00987;P04637-Q06609;P05412-P04637;P05412-P19838;P05412-…
Acetylation and Deacetylation of RelA in The Nucleus	O14920;O15111;O15379;P01375;P19438;P19838;P20333;P25963;Q04206;Q09472;Q13158;Q13546;Q15628;Q92793;Q9Y4K3;Q9Y6K9	O14920-P19838;O14920-P25963;O14920-Q04206;O14920-Q13546;O14920-Q15628;O14920-Q9Y4K3;O15111-O14920;O15111-P01375;O15111-P19438;O15111-Q04206;O15111-Q13158;O15111-Q13546;O15111-Q15628;O15111-Q9Y4K3;O15379-P01375;O15379-P19438;O15379-P19838;O15379-P25963;O15379-Q04206;P01375-O14920;P01375-P19438;P01375-P20333;P01375-Q13546;P01375-Q15628;P01375-Q9Y4K3;P01375-Q9Y6K9;P19438-O14920;P19438-P20333;P19438-…
Actions of Nitric Oxide in the Heart	P01042;P02708;P07900;P10644;P11229;P13861;P15692;P17948;P22612;P22694;P29474;P30411;P31321;P31323;P31749;P35916;P35968;P62158;P68133;Q03135;Q13237;Q13370;Q13976;Q14432;Q92736	P07900-P15692;P07900-P31323;P07900-P35968;P07900-P62158;P10644-P13861;P10644-P22694;P10644-P31321;P10644-P31323;P10644-Q13237;P10644-Q13976;P13861-P31323;P13861-Q13237;P13861-Q13976;P15692-P17948;P15692-P35968;P22612-P10644;P22612-Q92736;P22694-P07900;P22694-P13861;P22694-P31323;P22694-Q92736;P29474-P07900;P29474-P15692;P30411-P01042;P31323-Q13237;P31323-Q13976;P31749-P07900;P31749-P10644;P31749-…
Activation of Csk by cAMP-dependent Protein Kinase Inhibits Signaling through the T Cell Receptor	P01730;P01903;P01911;P01912;P04234;P06239;P07766;P08575;P09693;P10644;P13861;P20963;P22612;P22694;P31321;P31323;P41240;P43403;P62873;P63092;P84996;Q08828;Q29974;Q5JWF2;Q92793	P01730-P01903;P01730-P01911;P01730-P01912;P01730-P06239;P01730-P08575;P01730-P41240;P01730-P43403;P01730-P62873;P01730-Q29974;P01903-P01911;P01903-P01912;P01903-P06239;P01903-P08575;P01903-P43403;P01903-Q29974;P01911-P06239;P01911-P08575;P01911-P43403;P01912-P06239;P01912-P08575;P01912-P43403;P04234-P01730;P04234-P01903;P04234-P01911;P04234-P01912;P04234-P06239;P04234-P08575;P04234-P09693;P04234-…
Activation of PKC through G protein coupled receptor	P05771;P17252;P19838;P25963;P50148;Q04206;Q9NQ66	P17252-Q04206;P19838-P17252;P19838-P25963;P19838-Q04206;P25963-P17252;Q04206-P25963;Q9NQ66-P05771;Q9NQ66-P17252;Q9NQ66-P50148
Activation of Src by Protein-tyrosine phosphatase alpha	P05771;P06493;P12931;P14635;P17252;P18433;P30304;P30305;P30307;P41240;P62993	P05771-P12931;P12931-P18433;P12931-P62993;P14635-P06493;P14635-P30304;P14635-P30305;P17252-P12931;P18433-P62993;P30304-P06493;P30305-P06493;P30307-P06493;P30307-P14635;P41240-P12931;P41240-P62993;P62993-P05771;P62993-P17252
Activation of cAMP-dependent protein kinase, PKA	P10644;P17612;P62873;P63092;P84996;Q08828;Q5JWF2	P17612-P10644;P62873-P17612;P63092-P62873;P84996-P62873;Q08828-P17612;Q08828-P62873;Q08828-P63092;Q08828-P84996;Q08828-Q5JWF2;Q5JWF2-P62873
Acute Myocardial Infarction	P00734;P00742;P00747;P00750;P01008;P02462;P02671;P02675;P02679;P04070;P07225;P08572;P08709;P10646;P25116;P29400;P53420;Q01955	P00734-P01008;P00734-P02671;P00734-P02675;P00734-P02679;P00734-P04070;P00734-P07225;P00734-P25116;P00742-P00734;P00742-P00747;P00742-P00750;P00742-P01008;P00742-P08709;P00742-P10646;P00750-P00734;P00750-P00747;P00750-P02671;P02462-P08572;P02462-P29400;P02462-P53420;P02671-P00747;P02675-P00747;P02675-P00750;P02675-P02671;P02679-P02671;P02679-P02675;P04070-P07225;P08572-P29400;P08572-P53420;P08709-…
Adhesion Molecules on Lymphocyte	P05107;P05362;P05556;P13612;P14151;P16070;P16581;P20701	P05107-P05362;P05107-P20701;P13612-P05107;P13612-P05556;P14151-P16581;P16070-P16581;P20701-P05362
Adhesion and Diapedesis of Granulocytes	P01375;P01579;P01583;P05107;P05362;P10145;P11215;P14151;P16109;P20701;Q14242	P01583-P01375;P01583-P10145;P05107-P05362;P05107-P11215;P05107-P16109;P05107-P20701;P05107-Q14242;P05362-P01375;P05362-P01579;P05362-P11215;P11215-P16109;P11215-Q14242;P14151-Q14242;P20701-P05362;Q14242-P16109
Adhesion and Diapedesis of Lymphocytes	P01583;P05107;P05362;P05556;P10145;P13612;P14151;P19320;P20701;P28906	P01583-P10145;P05107-P05362;P05107-P19320;P05107-P20701;P13612-P05107;P13612-P05556;P19320-P05556;P19320-P13612;P20701-P05362;P28906-P14151
Agrin in Postsynaptic Differentiation	O14511;O14640;O15146;O75914;O96013;P00533;P02708;P05412;P05556;P08047;P11229;P11532;P12931;P24043;P27361;P28482;P45983;P46939;P49023;P56199;P56975;P60953;P63000;P68133;Q02297;Q05397;Q13153;Q13177;Q13702;Q14118;Q14161;Q14247;Q16363;Q16787;Q9NQU5;Q9P286	O14511-P12931;O14511-P56975;O14640-P63000;O15146-O75914;O15146-P12931;O15146-P63000;O15146-Q13153;O15146-Q13177;O15146-Q13702;O15146-Q9NQU5;O75914-P46939;O75914-Q13702;O96013-P12931;O96013-P60953;O96013-P63000;P00533-O14511;P00533-P05556;P00533-P08047;P00533-P27361;P00533-P28482;P00533-P49023;P00533-P56199;P00533-P56975;P00533-P63000;P00533-Q02297;P00533-Q13153;P02708-O75914;P02708-P05556;P02708-…
Ahr Signal Transduction Pathway	O00170;P07900;P27540;P35869	O00170-P27540;O00170-P35869;P07900-O00170;P27540-P35869;P35869-P07900
Alternative Complement Pathway	P00746;P00751;P01024;P01031;P02748;P07357;P10643;P13671;P27918	P00751-P00746;P00751-P01024;P01024-P00746;P01024-P27918;P01031-P00751;P01031-P01024;P01031-P02748;P01031-P07357;P01031-P27918;P07357-P02748;P10643-P01031;P10643-P02748;P10643-P07357;P10643-P27918;P13671-P01031;P13671-P02748;P13671-P07357;P13671-P10643;P13671-P27918;P27918-P00751
Angiotensin II mediated activation of JNK Pathway via Pyk2 dependent signaling	P00533;P01019;P01112;P04049;P05412;P05771;P12931;P15336;P17252;P19419;P27361;P28482;P29353;P30556;P36507;P45983;P45985;P50148;P62158;P62993;P63000;Q02078;Q02080;Q02750;Q05397;Q06413;Q07889;Q13153;Q13233;Q14289;Q14814	P00533-P01112;P00533-P05771;P00533-P27361;P00533-P28482;P00533-P36507;P00533-P62158;P00533-P62993;P00533-P63000;P00533-Q02750;P00533-Q13153;P01019-P30556;P01019-P50148;P01112-P04049;P01112-P05412;P01112-P05771;P01112-P12931;P01112-P17252;P01112-P27361;P01112-P28482;P01112-P29353;P01112-P36507;P01112-P45983;P01112-P63000;P01112-Q02750;P01112-Q05397;P01112-Q07889;P01112-Q13233;P01112-Q14289;P04049-…
Angiotensin-converting enzyme 2 regulates heart function	P00797;P01019;P02462;P08572;P12821;P23946;P29400;P30556;P50052;P53420;Q01955;Q9BYF1	P00797-P01019;P01019-P23946;P01019-P30556;P02462-P08572;P02462-P29400;P02462-P53420;P08572-P29400;P08572-P53420;P12821-P01019;P50052-P01019;P53420-P29400;Q01955-P29400;Q01955-P53420;Q9BYF1-P01019
Antigen Dependent B Cell Activation	P01730;P01903;P01911;P01912;P05112;P10747;P25445;P25942;P29965;P33681;P48023;Q29974	P01730-P01903;P01730-P01911;P01730-P01912;P01730-P33681;P01730-Q29974;P01903-P01911;P01903-P01912;P01903-Q29974;P10747-P01730;P10747-P01903;P10747-P01911;P10747-P01912;P10747-P33681;P10747-Q29974;P29965-P05112;P29965-P25942;P33681-P01903;P33681-P01911;P33681-P01912;P33681-Q29974;P48023-P25445
Antigen Processing and Presentation	P01903;P01911;P01912;P04439;P30443;P61769;Q29974	P01903-P01911;P01903-P01912;P01903-Q29974;P30443-P61769;P61769-P04439
Apoptotic DNA fragmentation and tissue homeostasis	O00273;O76075;P10144;P11388;P42574;P55210;Q02880	O76075-O00273;O76075-P11388;P42574-O00273;P42574-O76075;P42574-P10144;P55210-O00273;P55210-P10144;Q02880-P11388
Apoptotic Signaling in Response to DNA Damage	O14727;P04637;P05771;P09874;P10415;P17252;P31749;P42224;P42574;P49023;P55210;P55211;P55212;P55957;P99999;Q05397;Q07812;Q07817;Q13315;Q92934;Q9Y490	O14727-P10415;O14727-P42574;O14727-P55210;O14727-P55212;O14727-P99999;O14727-Q07812;O14727-Q07817;P04637-P09874;P04637-P10415;P05771-P42224;P05771-P49023;P05771-Q05397;P09874-P10415;P10415-P42224;P10415-P55211;P10415-P99999;P17252-P42224;P17252-P49023;P17252-Q05397;P31749-O14727;P31749-P04637;P31749-P05771;P31749-P10415;P31749-P17252;P31749-P42224;P31749-P42574;P31749-P55211;P31749-Q07812;P31749-…
Aspirin Blocks Signaling Pathway Involved in Platelet Activation	P00734;P01112;P04049;P05556;P05771;P12931;P17252;P25116;P27361;P28482;P43405;P47712;P56199;P62873;P63096;Q02750;Q05397;Q96RI0;Q9NQ66	P00734-P04049;P00734-P12931;P00734-P25116;P00734-P62873;P00734-P63096;P00734-Q02750;P00734-Q96RI0;P00734-Q9NQ66;P01112-P04049;P01112-P05771;P01112-P12931;P01112-P17252;P01112-P27361;P01112-P28482;P01112-Q02750;P01112-Q05397;P04049-Q02750;P05556-P05771;P05556-P12931;P05556-Q05397;P05771-P04049;P05771-P12931;P05771-Q05397;P12931-P04049;P12931-P47712;P12931-Q05397;P17252-P04049;P17252-P05556;P17252-…
Attenuation of GPCR Signaling	P05771;P10644;P13861;P17252;P22612;P22694;P31321;P31323;P62873;P63092;P84996;Q5JWF2	P10644-P13861;P10644-P22694;P10644-P31321;P10644-P31323;P13861-P31323;P22612-P05771;P22612-P10644;P22612-P17252;P22694-P05771;P22694-P13861;P22694-P17252;P22694-P31323;P62873-P05771;P62873-P17252;P62873-P22612;P62873-P22694;P63092-P62873;P84996-P62873;Q5JWF2-P62873
B Cell Survival Pathway	O15392;P01100;P05556;P17535;P27986;P31749;P42336;P42345;P42574;P48736;P55210;P56199;P98170;Q92785	O15392-P42574;O15392-P55210;P01100-P42345;P05556-P31749;P17535-P01100;P27986-P42336;P31749-O15392;P31749-P01100;P31749-P27986;P31749-P42336;P31749-P42574;P31749-P48736;P31749-P98170;P42345-P27986;P42345-P31749;P42345-P42336;P42345-P48736;P42574-P98170;P55210-P98170;P56199-P05556;P98170-O15392;Q92785-P05556;Q92785-P56199
B Lymphocyte Cell Surface Molecules	P01903;P01911;P01912;P05107;P05362;P08575;P17927;P20023;P20701;P33681;Q29974	P01903-P01911;P01903-P01912;P01903-P08575;P01903-Q29974;P01911-P08575;P01912-P08575;P05107-P05362;P05107-P20701;P20023-P17927;P20701-P05362;P33681-P01903;P33681-P01911;P33681-P01912;P33681-Q29974;Q29974-P08575
BCR Signaling Pathway	O95644;P01100;P01112;P04049;P05412;P05771;P07948;P11912;P15498;P16298;P17252;P19174;P19419;P27361;P29353;P40259;P43405;P45983;P48454;P62993;P63000;Q02750;Q06187;Q07889;Q08209;Q12968;Q13233;Q13469;Q14934;Q16539;Q8WV28	O95644-P16298;O95644-P48454;O95644-Q08209;O95644-Q12968;O95644-Q13469;P01100-O95644;P01100-P01112;P01100-P05771;P01100-P07948;P01100-P17252;P01100-P27361;P01100-P29353;P01100-P43405;P01100-P45983;P01100-Q12968;P01100-Q13469;P01100-Q16539;P01112-P04049;P01112-P05412;P01112-P05771;P01112-P15498;P01112-P17252;P01112-P19174;P01112-P27361;P01112-P29353;P01112-P45983;P01112-P63000;P01112-Q02750;P01112-…
BRCA1-dependent Ub-ligase activity	O15287;P38398;Q00597;Q9BXW9;Q9HB96;Q9NPI8	O15287-Q00597;O15287-Q9HB96;P38398-O15287;P38398-Q00597;P38398-Q9HB96;P38398-Q9NPI8;Q9BXW9-O15287;Q9BXW9-P38398;Q9BXW9-Q00597;Q9BXW9-Q9NPI8;Q9HB96-Q00597;Q9HB96-Q9BXW9;Q9NPI8-O15287;Q9NPI8-Q00597;Q9NPI8-Q9HB96
BTG family proteins and cell cycle regulation	P04637;P06400;P24385	P06400-P04637;P06400-P24385;P24385-P04637
Basic Mechanisms of SUMOylation	P55854;P61956;P63165;P63279;Q9UBE0;Q9UBT2	P61956-P55854;P61956-P63165;P61956-Q9UBE0;P61956-Q9UBT2;P63165-P55854;P63165-Q9UBE0;P63165-Q9UBT2;P63279-P55854;P63279-P61956;P63279-P63165;P63279-Q9UBE0;P63279-Q9UBT2;Q9UBE0-P55854;Q9UBE0-Q9UBT2;Q9UBT2-P55854
Basic mechanism of action of PPARa, PPARb(d) and PPARg and effects on gene expression	P19793;P37231;Q07869	P19793-Q07869;P37231-P19793;Q07869-P37231
Bioactive Peptide Induced Signaling Pathway	O60674;P00734;P01019;P01042;P01112;P04049;P05771;P06241;P10636;P17252;P19174;P27361;P28482;P29353;P29992;P36507;P40763;P42224;P42226;P42229;P45983;P50052;P51692;P52630;P62158;P62873;P62993;P63096;Q00535;Q02750;Q07889;Q13554;Q13555;Q13557;Q14289;Q14765;Q15746;Q16539;Q9UQM7	O60674-P04049;O60674-P06241;O60674-P27361;O60674-P28482;O60674-P40763;O60674-P42224;O60674-P42229;O60674-P51692;O60674-P52630;O60674-P62993;O60674-Q07889;O60674-Q14765;O60674-Q16539;P00734-P04049;P00734-P29992;P00734-P45983;P00734-P62873;P00734-P63096;P00734-Q02750;P01019-P29992;P01019-P40763;P01019-P42224;P01019-P62873;P01019-P63096;P01112-O60674;P01112-P04049;P01112-P05771;P01112-P17252;P01112-…
Blockade of Neurotransmitter Relase by Botulinum Toxin	P60880;P63027;Q16623	P60880-P63027;P60880-Q16623;Q16623-P63027
Bone Remodelling	O14788;P01100;P01574;P15407;P15408;P17181;P19525;P19838;P45983;P48551;Q00978;Q04206;Q9Y4K3;Q9Y6Q6	O14788-Q9Y4K3;P01100-O14788;P01100-P15407;P01100-P15408;P01100-P17181;P01100-P19838;P01100-P45983;P01100-P48551;P01100-Q00978;P01100-Q04206;P01100-Q9Y6Q6;P01574-P17181;P01574-P19838;P01574-Q04206;P15407-P45983;P15408-P45983;P17181-P48551;P19525-Q9Y4K3;P19838-Q00978;P19838-Q04206;P19838-Q9Y4K3;P19838-Q9Y6Q6;P45983-P19838;P45983-Q04206;P45983-Q9Y4K3;P48551-P01574;P48551-Q00978;Q00978-P19525;Q04206-…
Bystander B Cell Activation	P01730;P01903;P01911;P01912;P10747;P25445;P25942;P29965;P48023;Q29974	P01730-P01903;P01730-P01911;P01730-P01912;P01730-Q29974;P01903-P01911;P01903-P01912;P01903-Q29974;P10747-P01730;P10747-P01903;P10747-P01911;P10747-P01912;P10747-Q29974;P29965-P25942;P48023-P25445
CARM1 and Regulation of the Estrogen Receptor	O15379;P03372;P19447;P20226;P24385;P24928;P29083;P35269;P38398;P48552;P51843;P52655;P56524;Q06413;Q09472;Q13547;Q15648;Q86X55;Q8IZL8;Q8WUI4;Q92769;Q92793;Q969S8;Q96DB2;Q96T58;Q99623;Q9BY41;Q9HD15;Q9UBK2;Q9UBN7;Q9UKV0;Q9UQL6;Q9Y3R0;Q9Y618	O15379-P03372;O15379-P24385;O15379-P48552;O15379-P56524;O15379-Q06413;O15379-Q15648;O15379-Q9UBK2;O15379-Q9UKV0;O15379-Q9Y618;P03372-P38398;P03372-P51843;P03372-P56524;P03372-Q13547;P03372-Q92769;P03372-Q99623;P03372-Q9UKV0;P03372-Q9Y3R0;P19447-P20226;P19447-P24928;P19447-P35269;P19447-P52655;P20226-P03372;P20226-P29083;P24385-P03372;P24385-P38398;P24385-Q92793;P24928-P20226;P24928-P29083;P24928-…
CBL mediated ligand-induced downregulation of EGF receptors	P00533;P01133;P05771;P07333;P08581;P12931;P16234;P17252;P22681;P62993;Q96B97;Q9NR46;Q9Y371	P00533-P01133;P00533-P05771;P00533-P08581;P00533-P22681;P00533-P62993;P00533-Q96B97;P00533-Q9NR46;P00533-Q9Y371;P01133-P05771;P01133-P08581;P01133-P12931;P01133-P16234;P01133-P17252;P01133-P62993;P01133-Q96B97;P05771-P12931;P07333-P01133;P07333-P62993;P07333-Q96B97;P07333-Q9NR46;P07333-Q9Y371;P08581-P62993;P08581-Q96B97;P08581-Q9NR46;P08581-Q9Y371;P12931-P00533;P12931-P08581;P12931-P22681;P12931-…
CCR3 signaling in Eosinophils	O60237;O75116;O75747;P01112;P04049;P05771;P10916;P17252;P23528;P27361;P28482;P50148;P51671;P51677;P53667;P61586;P62873;P63092;P84996;Q02750;Q05397;Q5JWF2;Q9NQ66	O60237-O75116;O75747-Q9NQ66;P01112-P04049;P01112-P05771;P01112-P17252;P01112-P27361;P01112-P28482;P01112-P61586;P01112-Q02750;P01112-Q05397;P04049-P61586;P04049-Q02750;P05771-P04049;P05771-P61586;P05771-Q05397;P10916-O60237;P10916-O75116;P10916-P61586;P17252-P04049;P17252-P61586;P17252-Q05397;P23528-P61586;P27361-O75116;P27361-P04049;P27361-P05771;P27361-P17252;P27361-P28482;P27361-P61586;P27361-…
CD40L Signaling Pathway	O14920;O15111;O95163;P19838;P21580;P25942;P25963;P29965;Q04206;Q13114;Q13233;Q99558;Q9Y4K3;Q9Y6K9	O14920-P19838;O14920-P21580;O14920-P25963;O14920-Q04206;O14920-Q9Y4K3;O15111-O14920;O15111-P21580;O15111-Q04206;O15111-Q9Y4K3;O95163-O14920;O95163-O15111;P19838-O15111;P19838-P21580;P19838-P25963;P19838-Q04206;P19838-Q13114;P19838-Q9Y4K3;P19838-Q9Y6K9;P25942-P19838;P25942-P25963;P25942-Q04206;P25942-Q13233;P25942-Q99558;P25963-O15111;P25963-O95163;P25963-Q99558;P25963-Q9Y4K3;P25963-Q9Y6K9;P29965-…
CDK Regulation of DNA Replication	O43913;O43929;P24864;P24941;P25205;P33991;P33992;P33993;P46527;P49736;Q13415;Q13416;Q14566;Q99741;Q9H211;Q9UBD5;Q9Y5N6	O43913-P25205;O43913-P49736;O43913-Q13415;O43913-Q13416;O43913-Q99741;O43913-Q9UBD5;O43913-Q9Y5N6;O43929-O43913;O43929-P25205;O43929-P33993;O43929-P49736;O43929-Q13416;O43929-Q9UBD5;O43929-Q9Y5N6;P24864-O43929;P24864-P46527;P24864-Q13415;P24864-Q13416;P24864-Q99741;P24941-O43913;P24941-O43929;P24941-P24864;P24941-P33991;P24941-P33992;P24941-P33993;P24941-P46527;P24941-P49736;P24941-Q13415;P24941-…
CTCF: First Multivalent Nuclear Factor	P01106;P01137;P04637;P10600;P11912;P23443;P27986;P36897;P37173;P40259;P42336;P42345;P42771;P46527;P48736;P60484;P61812;P67775;Q00987;Q03167;Q13485;Q15797;Q8N726;Q99717	P01106-P04637;P01106-P23443;P01106-P67775;P01106-Q13485;P04637-Q00987;P10600-P36897;P10600-P37173;P11912-P23443;P11912-P27986;P11912-P42336;P11912-P42345;P23443-P36897;P23443-P37173;P23443-P42345;P27986-P23443;P27986-P37173;P27986-P42336;P27986-P60484;P36897-P01137;P36897-P27986;P36897-Q03167;P37173-P01137;P37173-P36897;P40259-P11912;P40259-P23443;P40259-P27986;P40259-P42336;P40259-P42345;P42336-…
CTL mediated immune response against target cells	P04234;P04439;P05107;P05362;P07766;P09693;P10144;P14222;P20701;P20963;P25445;P30443;P48023;P61769	P04234-P04439;P04234-P09693;P04234-P30443;P05107-P05362;P05107-P20701;P07766-P04234;P07766-P04439;P07766-P30443;P09693-P04439;P09693-P07766;P09693-P30443;P10144-P20963;P14222-P10144;P20701-P05362;P20963-P04234;P20963-P04439;P20963-P07766;P20963-P09693;P20963-P30443;P30443-P61769;P48023-P25445;P61769-P04234;P61769-P04439;P61769-P07766;P61769-P09693;P61769-P20963
CXCR4 Signaling Pathway	O75747;P01112;P04049;P05771;P17252;P19174;P19838;P27361;P27986;P28482;P42336;P46108;P48061;P49023;P50148;P56945;P61073;P62873;P63096;Q02750;Q04206;Q05397;Q14289	O75747-P19174;P01112-P04049;P01112-P05771;P01112-P17252;P01112-P19174;P01112-P27361;P01112-P27986;P01112-P28482;P01112-P42336;P01112-Q02750;P01112-Q05397;P01112-Q14289;P04049-Q02750;P04049-Q04206;P05771-P04049;P05771-P49023;P05771-Q05397;P05771-Q14289;P17252-P04049;P17252-P49023;P17252-Q04206;P17252-Q05397;P17252-Q14289;P19174-P05771;P19174-P17252;P19838-P04049;P19838-P17252;P19838-P27986;P19838-…
Ca++/ Calmodulin-dependent Protein Kinase Activation	P16220;P62158;Q13554;Q13555;Q13557;Q14012;Q16566;Q8N5S9;Q96RR4;Q9UQM7	Q13554-P16220;Q13554-Q13555;Q13554-Q13557;Q13554-Q16566;Q13554-Q8N5S9;Q13555-P16220;Q13555-P62158;Q13557-P16220;Q13557-Q13555;Q14012-P62158;Q16566-P16220;Q16566-Q8N5S9;Q16566-Q96RR4;Q96RR4-P62158;Q96RR4-Q14012;Q9UQM7-P16220;Q9UQM7-P62158;Q9UQM7-Q13554;Q9UQM7-Q13555;Q9UQM7-Q13557
Cadmium induces DNA synthesis and proliferation in macrophages	P01100;P01106;P01112;P01375;P04049;P05412;P05771;P17252;P19838;P25963;P27361;P28482;Q02750;Q04206;Q9NQ66	P01100-P01112;P01100-P01375;P01100-P05771;P01100-P17252;P01100-P19838;P01100-P27361;P01100-Q04206;P01106-P04049;P01106-P05412;P01106-P05771;P01106-P19838;P01106-P25963;P01106-P28482;P01106-Q04206;P01112-P04049;P01112-P05412;P01112-P05771;P01112-P17252;P01112-P27361;P01112-P28482;P01112-Q02750;P04049-Q02750;P04049-Q04206;P05412-P01100;P05412-P01375;P05412-P05771;P05412-P19838;P05412-P25963;P05412-…
Calcium Signaling by HBx of Hepatitis B virus	P01112;P12931;P16220;P29353;P62993;Q07889;Q14289	P01112-P12931;P01112-P29353;P01112-Q07889;P01112-Q14289;P12931-P62993;P16220-P29353;P16220-P62993;P16220-Q07889;P29353-P12931;P29353-P62993;P29353-Q07889;P62993-P01112;Q07889-P12931;Q07889-P62993;Q14289-P12931;Q14289-P29353;Q14289-P62993;Q14289-Q07889
Caspase Cascade in Apoptosis	O00273;O14727;O76075;P02545;P09874;P10144;P14222;P20700;P29466;P42574;P42575;P49662;P52566;P55210;P55211;P55212;P98170;P99999;Q03252;Q13489;Q13490;Q14790;Q92851	O14727-P42574;O14727-P55210;O14727-P55212;O14727-P98170;O14727-P99999;O14727-Q13489;O14727-Q13490;O14727-Q14790;O76075-O00273;P02545-Q03252;P10144-P09874;P10144-P29466;P10144-P55211;P10144-P98170;P10144-Q14790;P14222-P10144;P20700-P02545;P29466-P98170;P42574-O00273;P42574-O76075;P42574-P02545;P42574-P09874;P42574-P10144;P42574-P20700;P42574-P29466;P42574-P42575;P42574-P98170;P42574-P99999;P42574-…
Cell Cycle: G1/S Check Point	P00374;P00519;P01137;P04637;P06400;P06493;P10600;P11802;P24385;P24864;P24941;P30304;P38936;P42771;P42772;P46527;P49841;P61812;P78396;P84022;Q00534;Q01094;Q13309;Q13315;Q13485;Q13535;Q13547;Q14186;Q8N726	P00374-P04637;P00519-P06400;P00519-P24941;P00519-Q01094;P04637-P00519;P04637-P38936;P04637-P84022;P04637-Q13547;P04637-Q14186;P06400-P04637;P06400-P24385;P06400-Q00534;P06400-Q01094;P06400-Q13309;P06400-Q14186;P06493-P04637;P06493-P06400;P06493-P38936;P06493-P46527;P06493-P78396;P06493-Q01094;P11802-P06400;P11802-P38936;P11802-P84022;P11802-Q00534;P11802-Q01094;P11802-Q13485;P11802-Q13547;P11802-…
Cell Cycle: G2/M Checkpoint	O14757;O96017;P04637;P06493;P14635;P24522;P27348;P30291;P30304;P30305;P30307;P38398;P38936;P53350;P55273;P78527;Q00987;Q01538;Q04917;Q09472;Q13315;Q13535	O14757-P04637;O14757-P30291;O14757-P30304;O14757-P30305;O14757-P30307;O14757-P38398;O96017-P30304;O96017-P38398;O96017-Q00987;P04637-O96017;P04637-P38398;P04637-P38936;P04637-P53350;P04637-Q00987;P06493-P04637;P06493-P30291;P06493-P38936;P06493-Q01538;P14635-P04637;P14635-P06493;P14635-P30291;P14635-P30304;P14635-P30305;P14635-P38398;P14635-P38936;P14635-P53350;P14635-Q01538;P14635-Q04917;P24522-…
Cell to Cell Adhesion Signaling	P12814;P12931;P16284;P18206;P26232;P35221;P35222;P35609;P41240;P49023;P56945;Q05397;Q08043;Q9UI47	P12814-P12931;P12814-P18206;P12814-P26232;P12814-P35222;P12814-P49023;P12814-Q05397;P12814-Q9UI47;P12931-P16284;P12931-P18206;P12931-P56945;P12931-Q05397;P16284-P35222;P18206-P35221;P26232-P18206;P35221-P12814;P35221-P12931;P35222-P12931;P35222-P18206;P35222-P35221;P35609-P18206;P35609-P26232;P35609-P35221;P35609-P49023;P35609-Q05397;P35609-Q9UI47;P41240-P12931;P41240-P49023;P49023-P12931;P49023-…
Cells and Molecules involved in local acute inflammatory response	P01024;P01031;P01042;P01375;P01583;P05107;P05362;P05556;P10145;P10643;P13612;P13671;P16109;P19320;P20701;Q14242	P01024-P05107;P01031-P01024;P01375-P19320;P01583-P01375;P01583-P10145;P05107-P01042;P05107-P05362;P05107-P16109;P05107-P19320;P05107-P20701;P05107-Q14242;P05362-P01375;P10643-P01031;P13612-P05107;P13612-P05556;P13671-P01031;P13671-P10643;P19320-P05556;P19320-P13612;P20701-P05362;Q14242-P16109
Ceramide Signaling Pathway	O95831;P04049;P10415;P17405;P19438;P19838;P27361;P28482;P45983;P45985;P99999;Q02750;Q04206;Q07812;Q12933;Q13158;Q13233;Q13546;Q14790;Q15628;Q92636;Q92934	O95831-P10415;O95831-Q07812;O95831-Q92934;P04049-P10415;P04049-Q02750;P04049-Q04206;P04049-Q13233;P10415-P19838;P10415-P27361;P10415-P45983;P10415-P99999;P10415-Q04206;P17405-P19438;P17405-Q12933;P17405-Q15628;P19838-P04049;P19838-P19438;P19838-Q04206;P19838-Q12933;P19838-Q13546;P19838-Q15628;P27361-P04049;P27361-P19838;P27361-P28482;P27361-P45983;P27361-Q02750;P27361-Q04206;P28482-P04049;P28482-…
Chaperones modulate interferon Signaling Pathway	O14907;O14910;O14920;O60674;P01375;P01579;P04637;P06400;P15260;P19438;P19544;P19838;P20333;P25963;P38484;Q04206;Q96EY1;Q9Y6N9	O14907-Q9Y6N9;O14910-O14907;O14910-Q9Y6N9;O14920-P19838;O14920-P25963;O14920-Q04206;O60674-P15260;O60674-P19838;O60674-P25963;O60674-P38484;O60674-Q04206;P01375-O14920;P01375-P19438;P01375-P20333;P01579-O60674;P01579-P15260;P01579-P19838;P01579-P38484;P01579-Q04206;P04637-O14920;P04637-P25963;P06400-P04637;P15260-P19838;P15260-P38484;P15260-Q04206;P19438-O14920;P19438-O60674;P19438-P20333;P19544-…
Chromatin Remodeling by hSWI/SNF ATP-dependent Complexes	P04150;P19447;P20226;P24928;P29083;P35269;P52655;Q00403	P04150-P24928;P19447-P20226;P19447-P24928;P19447-P35269;P19447-P52655;P19447-Q00403;P20226-P04150;P20226-P29083;P24928-P20226;P24928-P29083;P24928-P35269;P29083-P19447;P35269-P20226;P35269-P29083;P52655-P04150;P52655-P20226;P52655-P24928;P52655-P29083;P52655-P35269;P52655-Q00403;Q00403-P04150;Q00403-P20226;Q00403-P24928;Q00403-P29083;Q00403-P35269
Circadian Rhythms	O00327;O15516;O15534;P49674;Q16526;Q49AN0	O00327-O15516;O00327-O15534;O00327-P49674;O00327-Q16526;O00327-Q49AN0;O15516-O15534;O15516-P49674;O15516-Q16526;O15516-Q49AN0;O15534-P49674;Q16526-O15534;Q16526-P49674;Q49AN0-O15534;Q49AN0-P49674
Classical Complement Pathway	P00736;P01024;P01031;P02745;P02746;P02747;P02748;P06681;P07357;P09871;P0C0L4;P0C0L5;P10643;P13671	P00736-P01024;P00736-P02745;P00736-P06681;P00736-P0C0L4;P01024-P0C0L4;P01031-P01024;P01031-P02748;P01031-P07357;P02745-P06681;P02745-P0C0L4;P02746-P00736;P02746-P02745;P02746-P06681;P02746-P09871;P02746-P0C0L4;P02747-P00736;P02747-P02745;P02747-P02746;P02747-P06681;P02747-P09871;P02747-P0C0L4;P06681-P01024;P06681-P01031;P06681-P0C0L4;P07357-P02748;P09871-P00736;P09871-P02745;P09871-P06681;P09871-…
Complement Pathway	O00187;P00736;P00746;P00751;P01024;P01031;P02745;P02746;P02747;P02748;P06681;P07357;P09871;P0C0L4;P0C0L5;P10643;P11226;P13671;P48740	O00187-P0C0L5;P00736-P01024;P00736-P02745;P00736-P06681;P00736-P0C0L4;P00751-P00746;P00751-P01024;P01024-O00187;P01024-P00746;P01024-P0C0L4;P01024-P48740;P01031-P00751;P01031-P01024;P01031-P02748;P01031-P07357;P02745-P06681;P02745-P0C0L4;P02746-P00736;P02746-P02745;P02746-P06681;P02746-P09871;P02746-P0C0L4;P02747-P00736;P02747-P02745;P02747-P02746;P02747-P06681;P02747-P09871;P02747-P0C0L4;P06681-…
Control of Gene Expression by Vitamin D Receptor	O75376;P19793;P49815;Q09472;Q13547;Q15596;Q15648;Q15788;Q86X55;Q92793;Q92831;Q9Y6Q9	O75376-P19793;O75376-Q15788;Q09472-O75376;Q09472-P19793;Q09472-P49815;Q09472-Q13547;Q09472-Q15596;Q09472-Q15648;Q09472-Q15788;Q09472-Q92793;Q09472-Q9Y6Q9;Q13547-O75376;Q13547-P19793;Q15596-O75376;Q15596-P19793;Q15648-O75376;Q15648-P19793;Q15648-Q15596;Q15648-Q15788;Q15648-Q9Y6Q9;Q15788-P19793;Q15788-Q15596;Q15788-Q92793;Q15788-Q9Y6Q9;Q86X55-O75376;Q86X55-P19793;Q86X55-Q09472;Q86X55-Q15596;Q86X55-…
Control of skeletal myogenesis by HDAC & calcium/calmodulin-dependent kinase (CaMK)	O95644;P01308;P05019;P06213;P08069;P15172;P16298;P27986;P31749;P42336;P48454;P48736;P52564;P62158;Q02078;Q02080;Q04917;Q06413;Q08209;Q13164;Q13469;Q14012;Q14814;Q16539;Q9UQL6;Q9Y6J0	O95644-P16298;O95644-P48454;O95644-Q08209;O95644-Q13469;P01308-P06213;P01308-P27986;P01308-P42336;P01308-P48736;P05019-P01308;P05019-P06213;P05019-P08069;P05019-P27986;P05019-P42336;P05019-P48736;P05019-Q04917;P06213-P27986;P06213-P42336;P06213-P48736;P08069-P01308;P08069-P42336;P08069-P48736;P08069-Q04917;P15172-O95644;P15172-Q06413;P27986-P08069;P27986-P42336;P31749-O95644;P31749-P01308;P31749-…
Corticosteroids and cardioprotection	P04083;P04150;P07550;P07900;P19838;P27986;P29474;P31749;P42336;P48736;P62158;P62873;P63092;P84996;Q04206;Q5JWF2	P04083-P04150;P04083-P62873;P04150-P31749;P07550-P62873;P07550-P63092;P07550-P84996;P07550-Q5JWF2;P07900-P04150;P07900-P27986;P07900-P42336;P07900-P62158;P19838-P04150;P19838-P27986;P19838-P42336;P19838-Q04206;P27986-P42336;P27986-Q04206;P29474-P07900;P31749-P07900;P31749-P19838;P31749-P27986;P31749-P29474;P31749-P42336;P31749-P48736;P31749-Q04206;P42336-Q04206;P62158-P29474;P62873-P27986;P62873-…
Cyclin E Destruction Pathway	P06400;P24864;P24941;P49427;P63208;Q01094;Q13616;Q14186;Q969H0	P06400-Q01094;P06400-Q14186;P24864-P06400;P24864-P63208;P24864-Q01094;P24864-Q13616;P24864-Q14186;P24941-P06400;P24941-P24864;P24941-P63208;P24941-Q14186;P49427-P63208;P49427-Q13616;P49427-Q969H0;Q01094-P24941;Q01094-Q14186;Q13616-P24941;Q13616-P63208;Q13616-Q01094;Q969H0-P24864;Q969H0-P63208;Q969H0-Q13616
Cycling of Ran in nucleocytoplasmic transport	P18754;P43487;P46060;P49792;P62826	P43487-P46060;P43487-P62826;P46060-P49792;P46060-P62826;P49792-P62826;P62826-P18754
Cyclins and Cell Cycle Regulation	P06400;P06493;P11802;P14635;P24385;P24864;P24941;P28749;P30279;P30281;P30304;P38936;P42771;P42772;P42773;P46527;P50613;P51946;P55273;P78396;Q00534;Q01094;Q14186;Q8N726	P06400-P24385;P06400-P30281;P06400-Q00534;P06400-Q01094;P06400-Q14186;P06493-P06400;P06493-P38936;P06493-P46527;P06493-P78396;P06493-Q01094;P11802-P06400;P11802-P28749;P11802-P38936;P11802-P50613;P11802-Q00534;P11802-Q01094;P11802-Q14186;P11802-Q8N726;P14635-P06493;P14635-P24941;P14635-P30304;P14635-P38936;P14635-P50613;P14635-P51946;P14635-Q00534;P24385-P11802;P24385-P24941;P24385-P28749;P24385-…
Cystic Fibrosis Transmembrane Conductance Regulator And Beta 2 Adrenergic Receptor Pathway	O14745;P07550;P10644;P13569;P13861;P15311;P22612;P22694;P31321;P31323;P63092;P84996;Q08828;Q5JWF2	O14745-P07550;O14745-P13569;O14745-P15311;P07550-P10644;P07550-P13861;P07550-P31323;P07550-P63092;P07550-P84996;P07550-Q5JWF2;P10644-P13861;P10644-P22694;P10644-P31321;P10644-P31323;P13569-P07550;P13569-P15311;P13569-P22612;P13569-P22694;P13861-P31323;P15311-P22612;P15311-P22694;P22612-P10644;P22694-P13861;P22694-P31323;Q08828-P07550;Q08828-P22612;Q08828-P22694;Q08828-P63092;Q08828-P84996;Q08828-…
Cytokine Network	P01375;P01579;P01583;P05112;P05113;P08700;P10145;P29459;P29460;P35225;P40933;P60568;Q14005;Q14116	P01579-P29459;P01579-P29460;P01583-P01375;P01583-P10145;P08700-P05113;P29459-P05112;P29459-P60568;P29459-Q14116;P29460-P05112;P29460-P29459;P29460-P60568;P29460-Q14116;P35225-P01583;P40933-P01583;Q14005-P01583;Q14116-P01583;Q14116-P60568
Cytokines and Inflammatory Response	P01137;P01375;P01579;P01583;P01730;P01903;P01911;P01912;P04141;P05112;P05113;P05231;P08700;P10145;P13232;P29459;P29460;P35225;P40933;P60568;P61812;Q29974	P01137-P01375;P01579-P29459;P01579-P29460;P01583-P01375;P01583-P10145;P01583-P13232;P01730-P01903;P01730-P01911;P01730-P01912;P01730-P29459;P01730-P29460;P01730-Q29974;P01903-P01911;P01903-P01912;P01903-P29459;P01903-P29460;P01903-Q29974;P01911-P29459;P01911-P29460;P01912-P29459;P01912-P29460;P04141-P05113;P04141-P08700;P05231-P01137;P08700-P05113;P29459-P05112;P29459-P60568;P29460-P05112;P29460-…
D4-GDI Signaling Pathway	O14727;P05412;P09874;P10144;P14222;P29466;P42574;P52566;P55211;P99999;Q14790;Q92851	O14727-P42574;O14727-P99999;O14727-Q14790;P05412-P10144;P10144-P09874;P10144-P29466;P10144-P55211;P10144-Q14790;P14222-P10144;P42574-P09874;P42574-P10144;P42574-P29466;P42574-P99999;P52566-P05412;P52566-P42574;P55211-O14727;P55211-P42574;P55211-P99999;Q14790-P42574;Q14790-P55211;Q14790-P99999;Q92851-P10144;Q92851-P42574;Q92851-P99999;Q92851-Q14790
Dendritic cells in regulating TH1 and TH2 Development	O00206;O60603;P01579;P04141;P05112;P05113;P06127;P06729;P08700;P29459;P29460	O60603-O00206;P01579-P29459;P01579-P29460;P04141-P05113;P04141-P08700;P06729-P06127;P08700-P05113;P29459-P05112;P29460-O00206;P29460-O60603;P29460-P05112;P29460-P29459
Deregulation of CDK5 in Alzheimers Disease	P04632;P05067;P07384;P10636;P48729;P48730;P49841;P67775;Q00535;Q15078	P05067-P10636;P07384-P04632;P07384-Q15078;P48729-P49841;P48729-P67775;P48730-P49841;P48730-P67775;P49841-P05067;P49841-P10636;P49841-P67775;Q00535-P05067;Q00535-P10636;Q00535-P49841;Q15078-P10636;Q15078-P48730;Q15078-P49841;Q15078-Q00535
Dicer Pathway	Q9H9G7;Q9HCK5;Q9UKV8;Q9UL18;Q9UPY3	Q9H9G7-Q9HCK5;Q9H9G7-Q9UKV8;Q9HCK5-Q9UPY3;Q9UKV8-Q9HCK5;Q9UKV8-Q9UPY3;Q9UL18-Q9H9G7;Q9UL18-Q9HCK5;Q9UL18-Q9UKV8;Q9UL18-Q9UPY3;Q9UPY3-Q9H9G7
Double Stranded RNA Induced Gene Expression	O15111;P04637;P05198;P19525;P19838;P20042;P25963;Q04206;Q13217;Q99558	O15111-P19525;O15111-Q04206;P04637-P20042;P04637-P25963;P05198-P19525;P19525-P04637;P19525-P20042;P19525-P25963;P19838-O15111;P19838-P04637;P19838-P25963;P19838-Q04206;P20042-P05198;P25963-O15111;P25963-Q99558;Q04206-P04637;Q04206-P25963;Q13217-P19525;Q99558-O15111;Q99558-P19838;Q99558-Q04206
Downregulated of MTA-3 in ER-negative Breast Tumors	O43623;O95863;O95983;P03372;P04406;P04792;P12830;P68366;Q13330;Q13547;Q71U36;Q9BQE3;Q9BTC8	O43623-Q13547;O95863-P12830;O95863-Q13547;O95983-Q13330;O95983-Q13547;P03372-P04406;P03372-P04792;P03372-Q13547;P03372-Q71U36;P03372-Q9BTC8;P12830-O43623;Q13330-P03372;Q13330-Q13547;Q13547-P12830;Q13547-Q9BTC8;Q71U36-P68366;Q9BQE3-P68366;Q9BTC8-O95983
E2F1 Destruction Pathway	P06400;P24864;P24941;P49427;P63208;P78396;Q01094;Q13309;Q13616;Q14186	P06400-Q01094;P06400-Q13309;P06400-Q14186;P24864-P06400;P24864-P63208;P24864-Q01094;P24864-Q13616;P24864-Q14186;P24941-P06400;P24941-P24864;P24941-P63208;P24941-Q14186;P49427-P63208;P49427-Q13616;P78396-P06400;P78396-P24941;P78396-P63208;P78396-Q01094;P78396-Q13309;P78396-Q14186;Q01094-P24941;Q01094-Q14186;Q13309-P24864;Q13309-P24941;Q13309-P49427;Q13309-P63208;Q13309-Q01094;Q13616-P24941;Q13616-…
EGF Signaling Pathway	P00533;P01100;P01112;P01133;P04049;P05412;P05771;P11831;P17252;P19174;P19419;P20936;P23458;P27361;P27986;P29353;P40763;P42224;P42226;P42229;P42336;P45983;P45985;P51692;P52630;P62993;P68400;Q02750;Q07889;Q13233;Q14765	P00533-P01100;P00533-P01112;P00533-P01133;P00533-P05771;P00533-P19174;P00533-P20936;P00533-P23458;P00533-P27361;P00533-P40763;P00533-P42224;P00533-P42226;P00533-P42336;P00533-P51692;P00533-P62993;P00533-Q02750;P00533-Q14765;P01100-P01112;P01100-P05771;P01100-P11831;P01100-P17252;P01100-P27361;P01100-P29353;P01100-P40763;P01100-P42224;P01100-P42229;P01100-P45983;P01100-P51692;P01100-P68400;P01100-…
EPO Signaling Pathway	O60674;P01100;P01112;P01588;P04049;P05412;P19174;P19235;P19419;P27361;P29350;P29353;P42229;P45983;P51692;P62993;P68400;Q02750;Q07889	O60674-P04049;O60674-P19235;O60674-P27361;O60674-P42229;O60674-P51692;O60674-P62993;O60674-Q07889;P01100-P01112;P01100-P27361;P01100-P29353;P01100-P42229;P01100-P45983;P01100-P51692;P01100-P68400;P01112-O60674;P01112-P04049;P01112-P05412;P01112-P19174;P01112-P27361;P01112-P29353;P01112-P45983;P01112-Q02750;P01112-Q07889;P01588-O60674;P01588-P19174;P01588-P29350;P01588-P29353;P01588-P42229;P01588-…
ER?associated degradation (ERAD) Pathway	P62877;P63208;P63279;Q13616;Q9UBE0;Q9UBT2	P62877-P63208;P62877-Q13616;P62877-Q9UBE0;P63279-Q9UBE0;P63279-Q9UBT2;Q13616-P63208;Q13616-Q9UBE0;Q9UBE0-P63208;Q9UBE0-Q9UBT2
Effects of calcineurin in Keratinocyte Differentiation	O95644;P05771;P08047;P16298;P17252;P19174;P29966;P38936;P48454;P50148;P62158;Q02447;Q08209;Q12968;Q13469;Q14934	O95644-P16298;O95644-P48454;O95644-Q02447;O95644-Q08209;O95644-Q12968;O95644-Q13469;P19174-P05771;P19174-P16298;P19174-P17252;P19174-P48454;P19174-Q08209;P29966-P05771;P29966-P17252;P29966-P62158;P38936-P08047;P38936-Q02447;P50148-P19174;Q02447-P08047;Q12968-P16298;Q12968-P48454;Q12968-Q08209;Q13469-P16298;Q13469-P48454;Q13469-Q08209;Q13469-Q12968;Q14934-P16298;Q14934-P48454;Q14934-Q08209
Electron Transport Reaction in Mitochondria	O14521;P00395;P12235;P12236;P21912;P31040;P31930;P99999;Q99643	P21912-O14521;P21912-P31040;P21912-Q99643;P31040-O14521;P31040-Q99643;P31930-P99999;P99999-P00395;P99999-P12235;P99999-P12236;Q99643-O14521
Endocytotic role of NDK, Phosphins and Dynamin	O00499;O15056;O43426;O95782;P15531;P22392;P42566;P48454;P49418;Q05193;Q13492;Q96CW1;Q9Y6I3	O00499-O15056;O00499-O43426;O00499-P48454;O00499-P49418;O00499-Q13492;O00499-Q9Y6I3;O43426-P49418;O95782-Q05193;P22392-P15531;P42566-O95782;P42566-Q96CW1;P42566-Q9Y6I3;P48454-O15056;P48454-O43426;Q05193-O00499;Q05193-O43426;Q05193-P42566;Q05193-P49418;Q13492-O15056;Q13492-O43426;Q13492-P48454;Q96CW1-O95782;Q96CW1-Q05193;Q96CW1-Q9Y6I3;Q9Y6I3-O15056;Q9Y6I3-O43426;Q9Y6I3-O95782;Q9Y6I3-P48454;Q9Y6I3-…
Eph Kinases and ephrins support platelet aggregation	P05556;P06241;P07948;P32004;P54762;P54764;P56199;P61224;P68133	P05556-P32004;P05556-P61224;P06241-P05556;P06241-P07948;P06241-P56199;P07948-P05556;P54762-P06241;P54762-P07948;P54764-P06241;P54764-P07948;P56199-P05556;P68133-P05556;P68133-P56199
Erk and PI-3 Kinase Are Necessary for Collagen Binding in Corneal Epithelia	O60610;P01112;P04049;P05556;P06241;P06396;P07737;P10916;P12931;P27361;P27986;P28482;P29353;P42336;P48736;P49023;P56199;P61586;Q02750;Q05397;Q13017;Q13464;Q15746;Q9Y490	O60610-P07737;P01112-P04049;P01112-P12931;P01112-P27361;P01112-P27986;P01112-P28482;P01112-P29353;P01112-P42336;P01112-P61586;P01112-Q02750;P01112-Q05397;P04049-P06241;P04049-P29353;P04049-P61586;P04049-Q02750;P05556-P12931;P05556-P29353;P05556-P61586;P05556-Q05397;P05556-Q15746;P06241-P01112;P06241-P05556;P06241-P28482;P06241-P29353;P06241-P42336;P06241-P48736;P06241-P56199;P06241-P61586;P06396-…
Erk1/Erk2 Mapk Signaling pathway	O75582;P00533;P01106;P01112;P01138;P04049;P05556;P08069;P08138;P12931;P16234;P19419;P27361;P28482;P29353;P36507;P40763;P62873;P62993;P63092;P67775;P84996;Q02750;Q07889;Q15256;Q15418;Q5JWF2;Q9BUB5;Q9HBH9	P00533-P01112;P00533-P01138;P00533-P05556;P00533-P08069;P00533-P27361;P00533-P28482;P00533-P36507;P00533-P40763;P00533-P62993;P00533-P67775;P00533-Q02750;P01106-P04049;P01106-P28482;P01106-P40763;P01106-P67775;P01106-Q07889;P01112-P04049;P01112-P08069;P01112-P12931;P01112-P16234;P01112-P27361;P01112-P28482;P01112-P29353;P01112-P36507;P01112-P67775;P01112-Q02750;P01112-Q07889;P01112-Q15418;P01138-…
Erythrocyte Differentiation Pathway	P01137;P01588;P04141;P05231;P08700;P21583;P61812	P01588-P21583;P04141-P08700;P05231-P01137;P61812-P01137
Erythropoietin mediated neuroprotection through NF-kB	O60674;P01588;P19235;P19838;P25963;P27540;P38936;Q04206;Q16665	O60674-P19235;O60674-P19838;O60674-P25963;O60674-Q04206;P01588-O60674;P01588-P19838;P01588-Q16665;P19235-P01588;P19235-P19838;P19838-P25963;P19838-Q04206;P27540-P01588;P27540-P38936;P38936-Q16665;Q04206-P25963;Q16665-P19838;Q16665-P27540;Q16665-Q04206
Eukaryotic protein translation	O00418;O43432;P05198;P06730;P13639;P20042;P41091;P41567;P47813;P55010;P60842;P78344;Q04637;Q14152;Q14240	O00418-P13639;O43432-P60842;P05198-P06730;P05198-P41091;P05198-P55010;P05198-P60842;P05198-Q04637;P05198-Q14152;P05198-Q14240;P06730-O43432;P06730-P55010;P20042-O43432;P20042-P05198;P20042-P06730;P20042-P41091;P20042-P55010;P20042-P60842;P20042-P78344;P20042-Q04637;P20042-Q14152;P20042-Q14240;P41091-P06730;P41091-P55010;P41091-P60842;P41091-Q04637;P41091-Q14152;P41091-Q14240;P41567-O43432;P41567-…
Extrinsic Prothrombin Activation Pathway	P00734;P00742;P01008;P02671;P02675;P02679;P04070;P07225;P08709;P10646;P12259;P13726;P25116	P00734-P01008;P00734-P02671;P00734-P02675;P00734-P02679;P00734-P04070;P00734-P07225;P00734-P25116;P00742-P00734;P00742-P01008;P00742-P08709;P00742-P10646;P00742-P12259;P00742-P13726;P02675-P02671;P02679-P02671;P02679-P02675;P04070-P07225;P08709-P10646;P08709-P13726;P12259-P00734;P12259-P04070;P12259-P07225;P12259-P10646;P13726-P10646;P25116-P07225
FAS signaling pathway ( CD95 )	O00273;O15519;O43318;O43353;O76075;P02545;P05412;P06400;P09874;P20700;P25445;P42574;P45983;P45985;P48023;P52566;P55210;P55212;P78527;Q03252;Q12923;Q13153;Q13158;Q13177;Q13233;Q13813;Q14790;Q92851;Q9UER7;Q9UNN5	O15519-O43353;O15519-P42574;O15519-P48023;O15519-Q92851;O15519-Q9UER7;O15519-Q9UNN5;O43318-P45983;O43318-P45985;O43353-O43318;O76075-O00273;P02545-Q03252;P06400-P02545;P06400-P05412;P20700-P02545;P20700-P06400;P25445-O15519;P25445-Q92851;P42574-O00273;P42574-O76075;P42574-P02545;P42574-P09874;P42574-P20700;P42574-P45983;P42574-Q03252;P42574-Q13153;P42574-Q13158;P42574-Q13177;P42574-Q13233;P42574-…
FXR and LXR Regulation of Cholesterol Metabolism	P19793;Q13133;Q15466;Q96RI1	P19793-Q13133;Q13133-Q15466;Q15466-P19793;Q15466-Q96RI1;Q96RI1-P19793
Fc Epsilon Receptor I Signaling in Mast Cells	O14733;O95644;P01100;P01112;P04049;P05412;P05771;P07948;P12319;P15498;P16298;P19174;P19419;P27361;P27986;P28482;P29353;P30273;P42336;P43405;P45983;P45985;P47712;P48454;P48736;P62993;Q02750;Q06187;Q07889;Q08209;Q12968;Q13177;Q13233;Q13469;Q14934	O14733-P45983;O14733-Q13177;O95644-P16298;O95644-P48454;O95644-Q08209;O95644-Q12968;O95644-Q13469;P01100-O95644;P01100-P01112;P01100-P05771;P01100-P07948;P01100-P27361;P01100-P29353;P01100-P43405;P01100-P45983;P01100-Q12968;P01100-Q13469;P01112-P04049;P01112-P05412;P01112-P05771;P01112-P15498;P01112-P19174;P01112-P27361;P01112-P27986;P01112-P28482;P01112-P29353;P01112-P42336;P01112-P45983;P01112-…
Fibrinolysis Pathway	P00488;P00734;P00747;P00749;P00750;P02671;P02675;P02679;P05120;P05121;P25116;Q96IY4	P00488-P00734;P00488-P02675;P00488-P02679;P00734-P00749;P00734-P02671;P00734-P02675;P00734-P02679;P00734-P05121;P00734-P25116;P00734-Q96IY4;P00749-P00747;P00749-P00750;P00749-P05120;P00749-P05121;P00750-P00734;P00750-P00747;P00750-P02671;P00750-P05121;P02671-P00488;P02671-P00747;P02671-P00749;P02675-P00747;P02675-P00749;P02675-P00750;P02675-P02671;P02679-P00749;P02679-P02671;P02679-P02675;P05121-…
Free Radical Induced Apoptosis	P00441;P01375;P10145;P19838;Q04206;Q9Y5S8	P10145-P19838;P19838-P00441;P19838-P01375;P19838-Q04206;Q04206-P01375;Q04206-P10145;Q9Y5S8-Q04206
Function of SLRP in Bone: An Integrated View	P01137;P10600;P36897;P61812	P10600-P36897;P36897-P01137;P61812-P01137
G-Protein Signaling Through Tubby Proteins	P11229;P28335;P50148;P62873;Q9NQ66	P11229-P50148;P11229-P62873;P11229-Q9NQ66;P50148-P28335;P50148-P62873;P62873-P28335;P62873-Q9NQ66;Q9NQ66-P50148
GATA3 participate in activating the Th2 cytokine genes expression	O75444;O95644;P05112;P05113;P10644;P13861;P17275;P22612;P22694;P23771;P31321;P31323;P35225;P46734;Q13469;Q16539	O75444-O95644;O75444-Q13469;O95644-Q13469;P05112-O75444;P05112-O95644;P05112-Q16539;P05113-O95644;P05113-P22612;P05113-P22694;P10644-P13861;P10644-P22694;P10644-P31321;P10644-P31323;P13861-P31323;P17275-O75444;P17275-O95644;P17275-Q13469;P17275-Q16539;P22612-P10644;P22694-P13861;P22694-P31323;P23771-O75444;P23771-O95644;P23771-P05112;P23771-P05113;P23771-P17275;P23771-P35225;P23771-Q13469;P35225-…
Gamma-aminobutyric Acid Receptor Life Cycle	O95166;P12931;P14867;P31644;Q05193;Q9NQX3	O95166-P14867;O95166-P31644;P12931-Q05193;P14867-Q9NQX3;P31644-Q9NQX3
Generation of amyloid b-peptide by PS1	O14672;P05067;P49768;P56817	O14672-P05067;P05067-P49768;P56817-P05067
Granzyme A mediated Apoptosis Pathway	O00273;O76075;P10144;P12544;P14222;P15531;P26583;P27695;P39687;Q01105	O76075-O00273;P12544-P14222;P12544-P26583;P14222-P10144;P27695-P12544;P39687-P12544;P39687-P27695;Q01105-P12544;Q01105-P15531;Q01105-P26583;Q01105-P27695;Q01105-P39687
Growth Hormone Signaling Pathway	O15524;O60674;P01112;P01241;P01308;P04049;P05771;P06213;P10912;P11831;P14672;P17252;P19174;P27361;P27986;P28482;P29350;P29353;P35568;P42229;P42336;P48736;P51692;P62993;Q02750;Q07889;Q15418	O15524-O60674;O15524-P06213;O15524-P10912;O15524-P35568;O15524-P42229;O15524-P51692;O15524-P62993;O60674-P04049;O60674-P27361;O60674-P28482;O60674-P35568;O60674-P42229;O60674-P42336;O60674-P48736;O60674-P51692;O60674-P62993;O60674-Q07889;P01112-O15524;P01112-O60674;P01112-P01308;P01112-P04049;P01112-P05771;P01112-P06213;P01112-P17252;P01112-P19174;P01112-P27361;P01112-P27986;P01112-P28482;P01112-…
HIV Induced T Cell Apoptosis	P01730;P04234;P07766;P09693;P10747;P20963;P25445;P48023;P51681	P04234-P01730;P04234-P09693;P07766-P01730;P07766-P04234;P09693-P01730;P09693-P07766;P10747-P01730;P10747-P04234;P10747-P07766;P10747-P09693;P20963-P01730;P20963-P04234;P20963-P07766;P20963-P09693;P20963-P10747;P48023-P25445;P51681-P01730
HIV-I Nef: negative effector of Fas and TNF	O00273;O14727;O14733;O15111;O15519;O76075;O95429;P01375;P02545;P06396;P06400;P09874;P10415;P19438;P19838;P20333;P20700;P20936;P25445;P25963;P42574;P42575;P45983;P48023;P49768;P49810;P52566;P55210;P55211;P55212;P55957;P63261;P78527;P78560;P98170;P99999;Q00987;Q03252;Q04206;Q05397;Q05655;Q12933;Q13077;Q13158;Q13177;Q13233;Q13489;Q13490;Q13546;Q13813;Q14790;Q14980;Q15628;Q99558;Q99683;Q9UER7	O14727-P10415;O14727-P42574;O14727-P55210;O14727-P55212;O14727-P98170;O14727-P99999;O14727-Q13489;O14727-Q13490;O14727-Q14790;O14733-P01375;O14733-P19438;O14733-P45983;O14733-Q12933;O14733-Q13077;O14733-Q13177;O14733-Q13546;O14733-Q15628;O14733-Q99683;O15111-P01375;O15111-P19438;O15111-P25445;O15111-P45983;O15111-P48023;O15111-Q04206;O15111-Q05655;O15111-Q13158;O15111-Q13546;O15111-Q15628;O15519-…
Hemoglobin's Chaperone	P06132;P08397;P10746;P13196;P13716;P15976;P22830;P68871;P69905;Q9NZD4	P06132-P10746;P08397-P06132;P13196-P06132;P13196-P08397;P13196-P10746;P13716-P13196;P15976-P68871;P22830-P15976;P69905-P68871;Q9NZD4-P69905
How Progesterone Initiates Oocyte Membrane	O15143;O15144;O15145;O15511;P01112;P06401;P06493;P10644;P12931;P13861;P14635;P22612;P22694;P27361;P28482;P30307;P31321;P31323;P59998;P61158;P61160;P62873;P63092;P63096;P84996;Q01538;Q08828;Q13526;Q15418;Q5JWF2;Q92747	O15143-O15144;O15143-O15145;O15143-O15511;O15143-P59998;O15143-P61160;O15144-O15145;O15144-O15511;O15144-P59998;O15144-P61160;O15144-Q92747;O15145-O15511;O15145-P61158;P01112-P12931;P01112-P27361;P01112-P28482;P01112-Q15418;P06401-P12931;P06401-P22612;P06401-P22694;P06493-P31323;P06493-Q01538;P10644-P13861;P10644-P22694;P10644-P31321;P10644-P31323;P13861-P31323;P14635-P06493;P14635-P13861;P14635-…
How does salmonella hijack a cell	O00401;O15143;O15144;O15145;O15511;P59998;P60953;P61158;P61160;P63000;P68133;Q92558;Q92747	O00401-O15143;O00401-P60953;O00401-P61160;O15143-O15144;O15143-O15145;O15143-O15511;O15143-P59998;O15143-P61160;O15143-Q92558;O15144-O00401;O15144-O15145;O15144-O15511;O15144-P59998;O15144-P60953;O15144-P61160;O15144-P63000;O15144-Q92558;O15144-Q92747;O15145-O00401;O15145-O15511;O15145-P60953;O15145-P61158;O15145-P63000;O15145-Q92558;O15511-O00401;O15511-P60953;O15511-P63000;O15511-Q92558;P59998-…
Human Cytomegalovirus and Map Kinase Pathways	P06400;P08047;P16220;P19838;P27361;P27986;P28482;P31749;P36507;P42336;P46734;P48736;P52564;Q02750;Q04206;Q13233;Q16539	P08047-P06400;P08047-P19838;P08047-Q04206;P16220-P08047;P16220-P19838;P16220-P27361;P16220-P28482;P19838-P27986;P19838-P42336;P19838-Q04206;P27361-P06400;P27361-P19838;P27361-P28482;P27361-Q02750;P27361-Q04206;P27361-Q16539;P27986-P42336;P27986-Q04206;P28482-P19838;P28482-Q02750;P28482-Q04206;P28482-Q13233;P31749-P06400;P31749-P16220;P31749-P19838;P31749-P27361;P31749-P27986;P31749-P28482;P31749-…
Hypoxia and p53 in the Cardiovascular system	P04637;P07900;P08183;P15559;P17936;P21675;P24522;P27694;P31749;P38936;P45983;P48729;P48730;Q00987;Q07812;Q09472;Q13315;Q15653;Q16665	P04637-P07900;P04637-P27694;P04637-P38936;P04637-Q00987;P07900-P48729;P08183-P04637;P08183-Q16665;P15559-P04637;P17936-P04637;P21675-P04637;P21675-Q00987;P24522-P04637;P24522-P38936;P24522-P45983;P31749-P04637;P31749-P07900;P31749-P45983;P31749-Q00987;P31749-Q07812;P31749-Q09472;P31749-Q15653;P31749-Q16665;P38936-Q00987;P38936-Q09472;P38936-Q16665;P45983-P04637;P45983-P21675;P45983-P38936;P45983-…
Hypoxia-Inducible Factor in the Cardiovascular System	P00338;P01588;P05305;P05412;P07237;P07900;P15692;P16220;P27540;P29474;P40337;Q09472;Q12797;Q16665;Q92905	P01588-Q16665;P05305-P05412;P05305-Q09472;P05305-Q16665;P05412-P07900;P05412-P15692;P07900-P15692;P16220-P00338;P16220-P05412;P16220-Q09472;P16220-Q16665;P27540-P00338;P27540-P01588;P27540-P05305;P27540-P05412;P27540-P15692;P27540-P16220;P27540-P29474;P27540-Q09472;P29474-P07900;P29474-P15692;P40337-Q92905;Q09472-P00338;Q09472-P01588;Q09472-P05412;Q09472-P15692;Q09472-P29474;Q09472-P40337;Q12797-…
IFN alpha signaling pathway	P01562;P01574;P17181;P23458;P29597;P42224;P48551;P52630;Q00978	P01562-P17181;P01562-P23458;P01562-P48551;P01574-P17181;P01574-P23458;P01574-P29597;P01574-P42224;P01574-P52630;P17181-P23458;P17181-P42224;P17181-P48551;P23458-P29597;P23458-P42224;P23458-P52630;P29597-P17181;P29597-P42224;P42224-P01562;P42224-P48551;P42224-Q00978;P48551-P01574;P48551-P23458;P48551-P29597;P48551-P52630;P48551-Q00978;P52630-P17181;P52630-P29597;P52630-P42224;P52630-Q00978
IFN gamma signaling pathway	O60674;P01579;P15260;P23458;P38484;P42224	O60674-P15260;O60674-P38484;O60674-P42224;P01579-O60674;P01579-P15260;P01579-P23458;P01579-P38484;P01579-P42224;P15260-P38484;P23458-O60674;P23458-P15260;P23458-P42224;P38484-P23458;P38484-P42224;P42224-P15260
IGF-1 Signaling Pathway	P01100;P01112;P04049;P05019;P05412;P08069;P11831;P19419;P20936;P27361;P27986;P29353;P35568;P42336;P45983;P48736;P62993;P68400;Q02750;Q06124;Q07889	P01100-P01112;P01100-P11831;P01100-P27361;P01100-P29353;P01100-P45983;P01100-P68400;P01112-P04049;P01112-P05019;P01112-P05412;P01112-P08069;P01112-P20936;P01112-P27361;P01112-P27986;P01112-P29353;P01112-P35568;P01112-P42336;P01112-P45983;P01112-Q02750;P01112-Q06124;P01112-Q07889;P04049-P11831;P04049-P20936;P04049-P29353;P04049-Q02750;P04049-Q07889;P05019-P04049;P05019-P05412;P05019-P08069;P05019-…
IL 17 Signaling Pathway	P01730;P01732;P04234;P06729;P07766;P09693;P19256;P20963	P01732-P04234;P04234-P01730;P04234-P09693;P06729-P19256;P07766-P01730;P07766-P01732;P07766-P04234;P09693-P01730;P09693-P01732;P09693-P07766;P20963-P01730;P20963-P01732;P20963-P04234;P20963-P07766;P20963-P09693
IL 2 signaling pathway	P01100;P01112;P01589;P04049;P05412;P06239;P14784;P19419;P23458;P27361;P29353;P31785;P42229;P43405;P45983;P51692;P52333;P60568;P62993;P68400;Q02750;Q07889	P01100-P01112;P01100-P27361;P01100-P29353;P01100-P42229;P01100-P43405;P01100-P45983;P01100-P51692;P01100-P60568;P01100-P68400;P01112-P01589;P01112-P04049;P01112-P05412;P01112-P06239;P01112-P14784;P01112-P23458;P01112-P27361;P01112-P29353;P01112-P31785;P01112-P45983;P01112-P52333;P01112-P60568;P01112-Q02750;P01112-Q07889;P01589-P04049;P01589-P06239;P01589-P14784;P01589-P23458;P01589-P27361;P01589-…
IL 3 signaling pathway	O60674;P01100;P01112;P04049;P08700;P26951;P27361;P29350;P29353;P32927;P42229;P51692;P62993;Q02750;Q07889	O60674-P04049;O60674-P27361;O60674-P32927;O60674-P42229;O60674-P51692;O60674-P62993;O60674-Q07889;P01100-P01112;P01100-P08700;P01100-P27361;P01100-P29353;P01100-P42229;P01100-P51692;P01112-O60674;P01112-P04049;P01112-P08700;P01112-P26951;P01112-P27361;P01112-P29353;P01112-Q02750;P01112-Q07889;P04049-P29353;P04049-Q02750;P04049-Q07889;P08700-O60674;P08700-P29350;P08700-P29353;P08700-P32927;P08700-…
IL 4 signaling pathway	P05112;P23443;P23458;P24394;P29353;P31749;P31785;P35568;P42226;P52333;P62993	P05112-P23458;P05112-P29353;P05112-P35568;P05112-P42226;P05112-P52333;P23443-P31749;P23458-P24394;P23458-P29353;P23458-P35568;P23458-P62993;P24394-P05112;P24394-P35568;P24394-P42226;P29353-P24394;P29353-P31785;P29353-P35568;P29353-P42226;P29353-P62993;P31749-P23458;P31749-P29353;P31749-P31785;P31749-P35568;P31749-P42226;P31749-P52333;P31749-P62993;P31785-P05112;P31785-P23458;P31785-P24394;P31785-…
IL 5 Signaling Pathway	P01584;P01730;P01903;P01911;P01912;P05112;P05113;P51671;P51677;Q01344;Q29974	P01584-P05112;P01730-P01903;P01730-P01911;P01730-P01912;P01730-Q29974;P01903-P01911;P01903-P01912;P01903-Q29974;P51677-P51671;Q01344-P05113
IL 6 signaling pathway	O60674;P01100;P01112;P04049;P05231;P05412;P08887;P11831;P17676;P19419;P23458;P27361;P29353;P29597;P40189;P40763;P52333;P62993;P68400;Q02750;Q06124;Q07889	O60674-P04049;O60674-P27361;O60674-P29597;O60674-P40763;O60674-P62993;O60674-Q07889;P01100-P01112;P01100-P05231;P01100-P11831;P01100-P27361;P01100-P29353;P01100-P40763;P01100-P68400;P01112-O60674;P01112-P04049;P01112-P05412;P01112-P23458;P01112-P27361;P01112-P29353;P01112-P52333;P01112-Q02750;P01112-Q06124;P01112-Q07889;P04049-P11831;P04049-P23458;P04049-P29353;P04049-Q02750;P04049-Q07889;P05231-…
IL-10 Anti-inflammatory Signaling Pathway	P01375;P01583;P05231;P09601;P22301;P23458;P40763;P42224;P42226;P42229;P51692;P52630;Q08334;Q13651;Q14765	P01583-P01375;P05231-P23458;P05231-P40763;P05231-P42224;P09601-P40763;P22301-P40763;P22301-P42224;P22301-P42226;P22301-Q08334;P23458-P40763;P23458-P42224;P23458-P51692;P23458-P52630;P23458-Q13651;P23458-Q14765;P40763-P01375;P40763-Q14765;P42224-P01375;P42224-P40763;P42226-P01375;P42229-P01375;P42229-P23458;P42229-P40763;P42229-P42224;P51692-P01375;P51692-P40763;P51692-P42224;P51692-P42229;P52630-…
IL-2 Receptor Beta Chain in T cell Activation	O14543;O15519;O15524;P01100;P01106;P01112;P01589;P04049;P10415;P14784;P22681;P23443;P23458;P25445;P27361;P27986;P28482;P29350;P29353;P31749;P31785;P35568;P42229;P42336;P43405;P46109;P48023;P48736;P51692;P52333;P62993;Q01094;Q07817;Q07889;Q13287;Q92934;Q9UKT9	O14543-P35568;O14543-P42229;O14543-P51692;O14543-Q07889;O15519-P04049;O15519-P48023;O15519-Q07817;O15524-O14543;O15524-P14784;O15524-P23458;O15524-P35568;O15524-P42229;O15524-P51692;O15524-P62993;P01100-P01112;P01100-P27361;P01100-P29353;P01100-P42229;P01100-P43405;P01100-P51692;P01100-Q01094;P01100-Q9UKT9;P01106-P04049;P01106-P23443;P01106-P28482;P01106-P42229;P01106-P51692;P01106-Q07889;P01112-…
IL-7 Signal Transduction	P06239;P06241;P10415;P13232;P16871;P23458;P27986;P31785;P42229;P42336;P48736;P51692;P52333;Q09472;Q13287;Q14289;Q92793	P06239-P27986;P06239-P42229;P06239-P48736;P06239-P51692;P06241-P06239;P06241-P23458;P06241-P31785;P06241-P42229;P06241-P42336;P06241-P48736;P06241-P51692;P06241-P52333;P10415-P31785;P10415-Q09472;P10415-Q92793;P13232-P23458;P13232-P27986;P13232-P42336;P13232-P52333;P16871-P06241;P16871-P13232;P16871-P23458;P16871-P27986;P16871-P52333;P16871-Q14289;P23458-P06239;P23458-P42336;P23458-P48736;P23458-…
IL12 and Stat4 Dependent Signaling Pathway in Th1 Development	O60674;P01579;P04234;P05412;P07766;P09693;P20963;P29459;P29460;P29597;P41161;P42701;P45983;P49682;P51681;P52564;Q13478;Q14116;Q14765;Q16539;Q99665	O60674-P29597;O60674-Q14765;O60674-Q16539;P01579-O60674;P01579-P05412;P01579-P29459;P01579-P29460;P01579-P29597;P01579-P42701;P01579-Q14765;P01579-Q99665;P04234-O60674;P04234-P05412;P04234-P09693;P04234-P29459;P04234-P29460;P04234-P29597;P04234-P42701;P04234-P45983;P04234-Q14765;P04234-Q99665;P05412-Q16539;P07766-O60674;P07766-P04234;P07766-P05412;P07766-P29459;P07766-P29460;P07766-P29597;P07766-…
IL22 Soluble Receptor Signaling Pathway	O14543;O60674;P23458;P29597;P40763;P42224;P42226;P42229;P51692;P52333;P52630;Q13651;Q14765;Q8N6P7;Q969J5;Q9GZX6	O14543-O60674;O14543-P29597;O14543-P40763;O14543-P42224;O14543-P42226;O14543-P42229;O14543-P51692;O14543-P52630;O14543-Q14765;O60674-P29597;O60674-P40763;O60674-P42224;O60674-P42229;O60674-P51692;O60674-P52630;O60674-Q14765;P23458-O14543;P23458-O60674;P23458-P29597;P23458-P40763;P23458-P42224;P23458-P51692;P23458-P52630;P23458-Q13651;P23458-Q14765;P29597-P42224;P40763-P29597;P40763-Q14765;P42224-…
Inactivation of Gsk3 by AKT causes accumulation of b-catenin in Alveolar Macrophages	O00206;O14640;O15169;O15530;P04628;P08571;P17302;P18428;P19525;P19838;P24385;P25054;P27986;P31749;P35222;P42336;P49841;P51617;P58753;P63096;P67775;Q04206;Q99836;Q9H0E2;Q9UJU2;Q9UP38;Q9Y6Y9	O00206-Q99836;O14640-O15169;O14640-P04628;O14640-P25054;O14640-P35222;O14640-P49841;O14640-Q9UP38;O15169-P25054;O15169-P35222;O15169-P49841;O15169-P67775;O15169-Q9UJU2;O15530-P27986;O15530-P31749;O15530-P42336;O15530-P67775;P08571-O00206;P08571-P19838;P08571-P51617;P08571-P58753;P08571-Q04206;P08571-Q99836;P08571-Q9Y6Y9;P18428-P08571;P19525-O00206;P19525-P51617;P19525-P58753;P19525-Q9H0E2;P19525-…
Induction of apoptosis through DR3 and DR4/5 Death Receptors	O00220;O00273;O14727;O14763;O15111;O15519;O43508;O43903;O76075;P02545;P10415;P19838;P25963;P42574;P50591;P55210;P55211;P55212;P55957;P98170;P99999;Q04206;Q12933;Q13158;Q13489;Q13490;Q13546;Q13813;Q14790;Q15628;Q92851;Q93038;Q99558	O00220-O14763;O00220-O15519;O00220-P50591;O00220-Q12933;O00220-Q14790;O00220-Q15628;O00220-Q92851;O14727-P10415;O14727-P42574;O14727-P55210;O14727-P55212;O14727-P98170;O14727-P99999;O14727-Q13489;O14727-Q13490;O14727-Q14790;O14763-O15519;O14763-P50591;O14763-Q12933;O14763-Q13158;O14763-Q13546;O14763-Q14790;O14763-Q15628;O15111-O00220;O15111-O14763;O15111-P50591;O15111-Q04206;O15111-Q13158;O15111-…
Influence of Ras and Rho proteins on G1 to S Transition	O14920;O15111;P01112;P04049;P06400;P11802;P19838;P24385;P24864;P24941;P25963;P27361;P27986;P28482;P31749;P38936;P42336;P46527;P61586;P63000;Q00534;Q01094;Q04206;Q13153;Q14186;Q9Y6K9	O14920-P19838;O14920-P25963;O14920-Q04206;O15111-O14920;O15111-P27361;O15111-P28482;O15111-Q04206;P01112-P04049;P01112-P27361;P01112-P27986;P01112-P28482;P01112-P42336;P01112-P61586;P01112-P63000;P04049-P61586;P04049-Q04206;P06400-P04049;P06400-P24385;P06400-Q00534;P06400-Q01094;P06400-Q14186;P11802-P06400;P11802-P27361;P11802-P28482;P11802-P38936;P11802-Q00534;P11802-Q01094;P11802-Q14186;P19838-…
Inhibition of Cellular Proliferation by Gleevec	O60674;P01100;P01106;P01112;P04049;P05412;P11274;P27361;P27986;P31749;P42224;P42229;P42336;P45983;P45985;P46109;P48736;P51692;P62993;Q02750;Q07889;Q13233;Q92934	O60674-P04049;O60674-P27361;O60674-P42224;O60674-P42229;O60674-P42336;O60674-P48736;O60674-P51692;O60674-P62993;O60674-Q07889;O60674-Q13233;P01100-P01112;P01100-P27361;P01100-P42224;P01100-P42229;P01100-P45983;P01100-P51692;P01106-P04049;P01106-P05412;P01106-P42224;P01106-P42229;P01106-P51692;P01106-Q07889;P01112-O60674;P01112-P04049;P01112-P05412;P01112-P27361;P01112-P27986;P01112-P42336;P01112-…
Inhibition of Huntington's disease neurodegeneration by histone deacetylase inhibitors	P16220;P42858;Q13547;Q92793	P16220-Q13547;Q92793-P16220;Q92793-P42858;Q92793-Q13547
Inhibition of Matrix Metalloproteinases	P01033;P08253;P14780;P16035;P35625;P50281	P08253-P14780;P14780-P01033;P14780-P35625;P16035-P08253;P35625-P08253;P50281-P08253;P50281-P16035
Insulin Signaling Pathway	P01100;P01112;P01308;P04049;P05412;P06213;P11831;P14672;P19419;P20936;P27361;P27986;P29353;P35568;P42336;P45983;P48736;P62993;P68400;Q02750;Q06124;Q07889	P01100-P01112;P01100-P11831;P01100-P27361;P01100-P29353;P01100-P45983;P01100-P68400;P01112-P01308;P01112-P04049;P01112-P05412;P01112-P06213;P01112-P20936;P01112-P27361;P01112-P27986;P01112-P29353;P01112-P35568;P01112-P42336;P01112-P45983;P01112-Q02750;P01112-Q06124;P01112-Q07889;P01308-P06213;P01308-P27361;P01308-P27986;P01308-P29353;P01308-P35568;P01308-P42336;P01308-P48736;P01308-Q06124;P01308-…
Integrin Signaling Pathway	O60237;P01112;P04049;P04632;P05412;P05556;P06241;P07384;P11274;P12814;P12931;P18206;P27361;P28482;P29353;P35609;P36507;P41240;P45983;P46109;P49023;P56199;P56945;P61586;P62834;P62993;P68133;Q02750;Q03135;Q05397;Q07889;Q08043;Q13464;Q13905;Q15942;Q9Y490	O60237-Q13464;P01112-P04049;P01112-P05412;P01112-P12931;P01112-P27361;P01112-P28482;P01112-P29353;P01112-P36507;P01112-P45983;P01112-P61586;P01112-Q02750;P01112-Q05397;P01112-Q07889;P04049-P06241;P04049-P29353;P04049-P36507;P04049-P61586;P04049-Q02750;P04049-Q07889;P05412-P28482;P05556-P12814;P05556-P12931;P05556-P18206;P05556-P29353;P05556-P45983;P05556-P61586;P05556-P62834;P05556-Q05397;P05556-…
Internal Ribosome Entry Pathway	O43432;P06730;P60842;P78344;Q04637;Q14152;Q14240	O43432-P60842;P06730-O43432;P60842-P06730;P60842-Q14152;P60842-Q14240;P78344-P06730;P78344-P60842;P78344-Q14152;Q04637-O43432;Q04637-P06730;Q04637-P60842;Q04637-Q14240;Q14152-O43432;Q14152-P06730;Q14152-Q04637;Q14240-O43432;Q14240-P06730;Q14240-P78344;Q14240-Q14152
Intrinsic Prothrombin Activation Pathway	P00451;P00734;P00740;P00742;P00748;P01008;P01042;P02462;P02671;P02675;P02679;P03951;P03952;P04070;P05155;P07225;P08572;P12259;P25116;P29400;P53420;Q01955	P00451-P00734;P00451-P00740;P00451-P04070;P00451-P07225;P00734-P00740;P00734-P01008;P00734-P02671;P00734-P02675;P00734-P02679;P00734-P04070;P00734-P07225;P00734-P25116;P00740-P01008;P00742-P00451;P00742-P00734;P00742-P00740;P00742-P01008;P00742-P12259;P00748-P01042;P00748-P03952;P00748-P05155;P02462-P00748;P02462-P08572;P02462-P29400;P02462-P53420;P02675-P02671;P02679-P02671;P02679-P02675;P03951-…
Ion Channel and Phorbal Esters Signaling Pathway	P05771;P17252;P19174;Q14289	P05771-Q14289;P17252-Q14289;P19174-P05771;P19174-P17252
Ion Channels and Their Functional Role in Vascular Endothelium	P29474;P62873;P63092;P84996;Q08828;Q5JWF2	P62873-P29474;P63092-P62873;P84996-P62873;Q08828-P62873;Q08828-P63092;Q08828-P84996;Q08828-Q5JWF2;Q5JWF2-P62873
Keratinocyte Differentiation	O14733;O14920;O15111;O15264;P00533;P01100;P01112;P01133;P01375;P04049;P05129;P05412;P05771;P08047;P10415;P14921;P15036;P17252;P19438;P19838;P20333;P24723;P25445;P25963;P27361;P28482;P45983;P45985;P46734;P48023;P49715;P52564;P67775;Q02156;Q02750;Q04206;Q04759;Q05655;Q12933;Q13233;Q13546;Q16539;Q99558;Q99683;Q9UER7	O14733-P01375;O14733-P19438;O14733-P45983;O14733-Q12933;O14733-Q13546;O14733-Q99683;O14920-P05771;O14920-P17252;O14920-P19838;O14920-P25963;O14920-Q02156;O14920-Q04206;O14920-Q04759;O14920-Q05655;O14920-Q12933;O14920-Q13546;O15111-O14920;O15111-P01375;O15111-P05771;O15111-P14921;O15111-P17252;O15111-P19438;O15111-P25445;O15111-P27361;O15111-P28482;O15111-P45983;O15111-P45985;O15111-P48023;O15111-…
Lck and Fyn tyrosine kinases in initiation of TCR Activation	P01730;P01903;P01911;P01912;P04234;P06239;P06241;P07766;P08575;P09693;P20963;P43403;Q29974	P01730-P01903;P01730-P01911;P01730-P01912;P01730-P06239;P01730-P06241;P01730-P08575;P01730-P43403;P01730-Q29974;P01903-P01911;P01903-P01912;P01903-P06239;P01903-P08575;P01903-P43403;P01903-Q29974;P01911-P06239;P01911-P08575;P01911-P43403;P01912-P06239;P01912-P08575;P01912-P43403;P04234-P01730;P04234-P01903;P04234-P01911;P04234-P01912;P04234-P06239;P04234-P06241;P04234-P08575;P04234-P09693;P04234-…
Lectin Induced Complement Pathway	O00187;P01024;P01031;P02748;P06681;P07357;P0C0L4;P0C0L5;P10643;P11226;P13671;P48740	O00187-P0C0L5;P01024-O00187;P01024-P0C0L4;P01024-P48740;P01031-P01024;P01031-P02748;P01031-P07357;P06681-O00187;P06681-P01024;P06681-P01031;P06681-P0C0L4;P06681-P11226;P06681-P48740;P07357-P02748;P0C0L4-O00187;P0C0L4-P01031;P0C0L4-P11226;P0C0L4-P48740;P0C0L5-P06681;P10643-P01031;P10643-P02748;P10643-P07357;P11226-O00187;P13671-P01031;P13671-P02748;P13671-P07357;P13671-P10643;P48740-O00187;P48740-…
Links between Pyk2 and Map Kinases	P01112;P04049;P05412;P05771;P12931;P17252;P19174;P27361;P28482;P29353;P36507;P45983;P45985;P46109;P46734;P50148;P56945;P62993;P63000;Q02750;Q07889;Q13153;Q13233;Q14289;Q16539	P01112-P04049;P01112-P05412;P01112-P05771;P01112-P12931;P01112-P17252;P01112-P19174;P01112-P27361;P01112-P28482;P01112-P29353;P01112-P36507;P01112-P45983;P01112-P63000;P01112-Q02750;P01112-Q07889;P01112-Q13233;P01112-Q14289;P01112-Q16539;P04049-P29353;P04049-P36507;P04049-Q02750;P04049-Q07889;P04049-Q13233;P05412-P05771;P05412-P28482;P05412-Q16539;P05771-P04049;P05771-P12931;P05771-P29353;P05771-…
Lissencephaly gene (LIS1) in neuronal migration and development	P00519;P78509;Q00535;Q14114;Q15078	P00519-P78509;P00519-Q00535;P00519-Q14114;Q14114-P78509;Q15078-Q00535
MAPKinase Signaling Pathway	O14733;O14920;O15111;O15264;O43283;O43318;O75582;O75676;O95382;O95819;P01100;P01106;P01112;P01137;P04049;P05412;P08047;P10398;P10600;P15056;P15336;P16220;P19419;P19838;P23443;P25963;P27361;P28482;P29353;P31152;P36507;P36897;P41279;P42224;P45983;P45984;P45985;P46734;P49137;P49715;P51812;P52564;P53778;P53779;P61244;P61812;P62993;P63000;P80192;Q02078;Q02080;Q02750;Q02779;Q04206;Q06413;Q12851;Q12852;…	O14733-O43283;O14733-P41279;O14733-P45983;O14733-P63000;O14733-Q12852;O14733-Q12933;O14733-Q13153;O14733-Q13177;O14733-Q13546;O14733-Q15628;O14733-Q16584;O14733-Q99683;O14733-Q9Y6R4;O14920-O95819;O14920-P19838;O14920-P25963;O14920-P41279;O14920-Q04206;O14920-Q12933;O14920-Q13546;O14920-Q15628;O14920-Q16584;O15111-O14920;O15111-O95819;O15111-P01106;O15111-P27361;O15111-P28482;O15111-P41279;O15111-…
METS affect on Macrophage Differentiation	O75182;P01100;P01112;P05412;P07333;P09603;P14921;P15036;P28749;P41162;Q01094;Q08999;Q16254;Q92769;Q96ST3;Q9UHI6;Q9UQL6;Q9Y618	P01100-P01112;P01100-Q01094;P01100-Q92769;P01100-Q96ST3;P01112-P05412;P05412-P01100;P05412-P14921;P05412-P15036;P05412-Q9Y618;P07333-P09603;P14921-P01100;P15036-P01100;P15036-P14921;P28749-O75182;P28749-Q01094;P28749-Q96ST3;P41162-O75182;P41162-P28749;P41162-Q92769;P41162-Q96ST3;P41162-Q9Y618;Q01094-P14921;Q01094-P15036;Q01094-Q08999;Q01094-Q16254;Q08999-P28749;Q16254-O75182;Q16254-P28749;Q16254-…
Map Kinase Inactivation of SMRT Corepressor	P00533;P01133;P10276;P10827;P10828;P19793;Q02750;Q05516;Q13233;Q16539;Q9Y618	P00533-P01133;P00533-Q02750;P10276-P10827;P10276-P10828;P10276-P19793;P10276-Q9Y618;P10827-P19793;P10827-Q9Y618;P10828-P19793;P10828-Q9Y618;Q02750-Q13233;Q02750-Q16539;Q02750-Q9Y618;Q05516-P10276;Q05516-Q9Y618;Q13233-Q16539;Q13233-Q9Y618;Q16539-P00533;Q16539-P10276;Q9Y618-P19793
Mechanism of Gene Regulation by Peroxisome Proliferators via PPARa(alpha)	O75376;P01106;P01308;P01375;P02647;P02652;P04085;P05412;P05771;P06400;P06858;P07148;P07900;P08047;P10589;P10644;P13861;P16671;P17252;P19793;P22612;P22694;P25963;P27361;P27986;P28482;P28562;P31321;P31323;P33316;P35228;P35354;P42229;P42336;P48163;P48552;P48736;P51659;P51692;Q04206;Q07869;Q08426;Q09472;Q13133;Q15067;Q15466;Q15648;Q15788;Q92793;Q99967;Q9HD15;Q9NY65;Q9UBK2;Q9Y3B7;Q9Y618	O75376-P01375;O75376-P19793;O75376-Q07869;O75376-Q15788;O75376-Q9UBK2;P01106-P05412;P01106-P05771;P01106-P07900;P01106-P08047;P01106-P25963;P01106-P28482;P01106-P31321;P01106-P42229;P01106-P51692;P01106-Q04206;P01106-Q09472;P01106-Q15466;P01106-Q92793;P01308-P27361;P01308-P27986;P01308-P28482;P01308-P42229;P01308-P42336;P01308-P48736;P01308-P51692;P02647-P02652;P02647-P06858;P02647-P16671;P02647-…
Mechanisms of transcriptional repression by DNA methylation	O75182;O95983;Q13547;Q92769;Q96ST3	O95983-Q13547;O95983-Q92769;Q13547-O75182;Q92769-O75182;Q92769-Q13547;Q96ST3-O75182;Q96ST3-Q13547;Q96ST3-Q92769
Melanocyte Development and Pigmentation Pathway	O75030;P10415;P10721;P16220;P21583;Q09472;Q15418	P10415-P16220;P10415-Q09472;P16220-O75030;P16220-Q09472;P21583-P10721;Q09472-O75030;Q15418-P16220
Monocyte and its Surface Molecules	P05107;P05362;P05556;P11215;P13612;P14151;P16070;P16109;P16581;P20701	P05107-P05362;P05107-P11215;P05107-P16109;P05107-P20701;P05362-P11215;P11215-P16109;P13612-P05107;P13612-P05556;P14151-P16581;P16070-P16581;P20701-P05362
Multi-step Regulation of Transcription by Pitx2	O14640;O15169;P04628;P25054;P35222;P49841;Q09472;Q13547;Q15648;Q86U70;Q92793;Q99697;Q9UJU2;Q9UP38;Q9Y4A5	O14640-O15169;O14640-P04628;O14640-P25054;O14640-P35222;O14640-P49841;O14640-Q9UP38;O15169-P25054;O15169-P35222;O15169-P49841;O15169-Q9UJU2;P25054-P35222;P25054-P49841;P35222-P04628;P35222-Q09472;P35222-Q86U70;P35222-Q9UP38;P35222-Q9Y4A5;P49841-P35222;Q09472-P04628;Q09472-Q13547;Q09472-Q15648;Q09472-Q92793;Q09472-Q9UJU2;Q09472-Q9Y4A5;Q13547-P35222;Q13547-Q99697;Q13547-Q9UJU2;Q15648-P04628;Q86U70-…
Multiple antiapoptotic pathways from IGF-1R signaling lead to BAD phosphorylation	P01112;P04049;P08069;P10644;P13861;P22612;P22694;P27361;P27986;P28482;P29353;P31321;P31323;P31749;P35568;P42336;P62993;Q02750;Q04917;Q07889;Q08828;Q15418;Q92934	P01112-P04049;P01112-P08069;P01112-P27361;P01112-P27986;P01112-P28482;P01112-P29353;P01112-P35568;P01112-P42336;P01112-Q02750;P01112-Q04917;P01112-Q07889;P01112-Q15418;P04049-P29353;P04049-Q02750;P04049-Q04917;P04049-Q07889;P08069-P04049;P08069-P22612;P08069-P22694;P08069-P27361;P08069-P28482;P08069-P29353;P08069-P35568;P08069-P42336;P08069-Q02750;P08069-Q04917;P08069-Q07889;P10644-P13861;P10644-…
NF-kB Signaling Pathway	O00206;O14920;O15111;O43318;P01375;P01583;P14778;P19438;P19838;P20333;P21580;P25963;P51617;Q04206;Q13158;Q13233;Q13546;Q15628;Q15750;Q99558;Q99836;Q9Y4K3;Q9Y6K9	O00206-P01375;O00206-Q99836;O00206-Q9Y4K3;O14920-O00206;O14920-P19838;O14920-P21580;O14920-P25963;O14920-Q04206;O14920-Q13546;O14920-Q15628;O14920-Q15750;O14920-Q99836;O14920-Q9Y4K3;O15111-O00206;O15111-O14920;O15111-P01375;O15111-P01583;O15111-P14778;O15111-P19438;O15111-P21580;O15111-Q04206;O15111-Q13158;O15111-Q13546;O15111-Q15628;O15111-Q15750;O15111-Q99836;O15111-Q9Y4K3;O43318-O00206;O43318-…
NFAT and Hypertrophy of the heart (Transcription in the broken heart)	O95644;P00734;P01112;P01160;P04049;P05019;P05305;P09038;P10644;P13861;P16298;P22612;P22694;P23443;P27361;P27797;P27986;P28482;P31321;P31323;P31749;P42336;P43694;P45983;P48454;P48729;P48736;P49841;P52952;P61296;P62158;P62942;P68133;Q02750;Q06413;Q08209;Q12968;Q13469;Q14012;Q14934;Q16539;Q16566;Q92793;Q96BH3;Q99075;Q9UKX2	O95644-P16298;O95644-P48454;O95644-P52952;O95644-Q08209;O95644-Q12968;O95644-Q13469;P00734-P04049;P00734-P05019;P00734-P09038;P00734-P10644;P00734-P13861;P00734-P31323;P00734-P45983;P00734-Q02750;P01112-P04049;P01112-P05019;P01112-P27361;P01112-P27986;P01112-P28482;P01112-P42336;P01112-P45983;P01112-Q02750;P01112-Q16539;P04049-Q02750;P05019-P04049;P05019-P23443;P05019-P27361;P05019-P27986;P05019-…
NFkB activation by Nontypeable Hemophilus influenzae	O14920;O15111;O43318;O60603;P01375;P01584;P04150;P10145;P19838;P25963;P28562;P36897;P37173;P46734;P52564;P84022;Q04206;Q09472;Q13485;Q15759;Q16539;Q92793;Q99558;Q99836	O14920-O60603;O14920-P19838;O14920-P25963;O14920-Q04206;O14920-Q99836;O15111-O14920;O15111-O60603;O15111-P01375;O15111-Q04206;O15111-Q99836;O43318-O14920;O43318-O15111;O43318-P01375;O43318-P19838;O43318-P25963;O43318-P37173;O43318-P52564;O43318-Q04206;O43318-Q15759;O43318-Q16539;O43318-Q99836;O60603-P01375;P01375-O14920;P01584-P19838;P01584-P25963;P01584-Q04206;P01584-Q15759;P01584-Q16539;P01584-…
NO2-dependent IL 12 Pathway in NK cells	O60674;P01579;P01730;P04234;P07766;P09693;P20963;P29459;P29460;P29597;P35228;P42701;P49682;P51681;Q14765;Q99665	O60674-P29597;O60674-P35228;O60674-Q14765;P01579-O60674;P01579-P29459;P01579-P29460;P01579-P29597;P01579-P42701;P01579-Q14765;P01579-Q99665;P01730-O60674;P01730-P29459;P01730-P29460;P01730-P29597;P01730-P42701;P01730-Q14765;P01730-Q99665;P04234-O60674;P04234-P01730;P04234-P09693;P04234-P29459;P04234-P29460;P04234-P29597;P04234-P42701;P04234-Q14765;P04234-Q99665;P07766-O60674;P07766-P01730;P07766-…
Nerve growth factor pathway (NGF)	P01100;P01112;P01138;P04049;P05412;P08138;P19174;P19419;P27361;P27986;P29353;P42336;P45983;P48736;P62993;P68400;Q02750;Q07889	P01100-P01112;P01100-P27361;P01100-P29353;P01100-P45983;P01100-P68400;P01112-P04049;P01112-P05412;P01112-P19174;P01112-P27361;P01112-P27986;P01112-P29353;P01112-P42336;P01112-P45983;P01112-Q02750;P01112-Q07889;P01138-P08138;P01138-P19174;P01138-P27986;P01138-P29353;P01138-P42336;P04049-P29353;P04049-Q02750;P04049-Q07889;P05412-P01100;P05412-P01138;P08138-P27986;P08138-P42336;P08138-P48736;P19174-…
Neuropeptides VIP and PACAP inhibit the apoptosis of activated T cells	O15111;O95644;P01106;P01282;P10644;P11161;P13861;P16298;P19174;P19838;P22612;P22694;P25963;P31321;P31323;P41587;P48454;P50148;P62158;Q04206;Q08209;Q13233;Q13469	O15111-P01106;O15111-Q04206;O95644-P11161;O95644-P16298;O95644-P48454;O95644-Q08209;O95644-Q13469;P01106-P19838;P01106-P25963;P01106-P31321;P01106-Q04206;P01282-P41587;P10644-P13861;P10644-P22694;P10644-P31321;P10644-P31323;P11161-P19838;P11161-Q13469;P13861-P31323;P19174-P16298;P19174-P48454;P19174-Q08209;P19838-O15111;P19838-P22612;P19838-P22694;P19838-P25963;P19838-Q04206;P22612-P10644;P22612-…
Neuroregulin receptor degredation protein-1 Controls ErbB3 receptor recycling	P00533;P01133;P21860;P51668;Q02297	P00533-P01133;P00533-P51668;P00533-Q02297;P01133-P51668;P01133-Q02297;P21860-P00533;P21860-P01133;P21860-Q02297
Neutrophil and Its Surface Molecules	P05107;P05362;P11215;P14151;P16070;P16581;P20701	P05107-P05362;P05107-P11215;P05107-P20701;P05362-P11215;P14151-P16581;P16070-P16581;P20701-P05362
Nitric Oxide Signaling Pathway	O15399;P05771;P10644;P13861;P17252;P22612;P22694;P29475;P31321;P31323;P48454;P62158;P78352;Q05586;Q12879;Q13224;Q14957	O15399-P05771;O15399-P17252;O15399-P22612;O15399-P22694;O15399-P29475;P10644-P13861;P10644-P22694;P10644-P31321;P10644-P31323;P13861-P31323;P22612-P05771;P22612-P10644;P22612-P17252;P22694-P05771;P22694-P13861;P22694-P17252;P22694-P31323;P29475-P05771;P29475-P10644;P29475-P13861;P29475-P17252;P29475-P31323;P29475-P48454;P48454-P13861;P48454-P31323;P78352-O15399;P78352-P17252;P78352-P29475;P78352-…
Nuclear Receptors in Lipid Metabolism and Toxicity	O95342;P08183;P10276;P21439;P37231;Q07869;Q13133;Q14994;Q15466;Q96RI1	O95342-Q15466;O95342-Q96RI1;P08183-P10276;P10276-Q15466;P21439-Q96RI1;Q07869-P37231;Q13133-P37231;Q13133-Q07869;Q13133-Q15466;Q15466-P37231;Q15466-Q07869;Q15466-Q14994;Q15466-Q96RI1
Nuclear receptors coordinate the activities of chromatin remodeling complexes and coactivators to facilitate initiation of transcription in carcinoma cells	O15379;P10276;P19447;P19793;P20226;P24928;P29083;P35269;P52655;Q00403;Q15596;Q15788;Q92831;Q9Y618;Q9Y6Q9	O15379-Q15596;O15379-Q15788;O15379-Q9Y618;O15379-Q9Y6Q9;P10276-O15379;P10276-P19793;P10276-Q15596;P10276-Q15788;P10276-Q9Y618;P19447-P20226;P19447-P24928;P19447-P35269;P19447-P52655;P19447-Q00403;P19793-O15379;P20226-P19793;P20226-P29083;P24928-P10276;P24928-P19793;P24928-P20226;P24928-P29083;P24928-P35269;P29083-P19447;P35269-P20226;P35269-P29083;P52655-P10276;P52655-P19793;P52655-P20226;P52655-…
Overview of telomerase RNA component gene hTerc Transcriptional Regulation	P06400;P08047;P23511;P25208;Q02447;Q13952	P08047-P06400;P08047-P23511;P08047-P25208;P23511-P06400;P25208-P06400;P25208-P23511;Q02447-P08047;Q13952-P08047;Q13952-P23511;Q13952-P25208
Overview of telomerase protein component gene hTert Transcriptional Regulation	P01106;P04637;P08047;P19544;P61244;Q02447;Q13547	P01106-P04637;P01106-P08047;P01106-P61244;P01106-Q02447;P01106-Q13547;P04637-P08047;P04637-Q02447;P04637-Q13547;P19544-P04637;P61244-P08047;Q02447-P08047;Q02447-Q13547;Q13547-P08047;Q13547-P61244
Oxidative Stress Induced Gene Expression Via Nrf2	O15525;O60675;P01100;P05412;P05771;P16220;P17252;P28482;P45983;Q14145;Q16539;Q9ULX9	O15525-O60675;O60675-P05771;O60675-P28482;P01100-P05771;P01100-P17252;P01100-P45983;P01100-Q16539;P05412-P01100;P05412-P05771;P05412-P28482;P05412-Q16539;P16220-P01100;P16220-P05412;P16220-P05771;P16220-P17252;P16220-P28482;P28482-P01100;P28482-P05771;P28482-P17252;P28482-P45983;P45983-P05412;P45983-P05771;Q14145-P05771;Q14145-P17252;Q16539-P16220;Q16539-P28482;Q9ULX9-O15525;Q9ULX9-P05771
PDGF Signaling Pathway	P01100;P01112;P04049;P04085;P05412;P05771;P11831;P16234;P17252;P19174;P19419;P20936;P23458;P27361;P27986;P29353;P40763;P42224;P42226;P42229;P42336;P45983;P45985;P48736;P51692;P52630;P62993;P68400;Q02750;Q07889;Q13233;Q14765	P01100-P01112;P01100-P05771;P01100-P11831;P01100-P17252;P01100-P27361;P01100-P29353;P01100-P40763;P01100-P42224;P01100-P42229;P01100-P45983;P01100-P51692;P01100-P68400;P01100-Q14765;P01112-P04049;P01112-P04085;P01112-P05412;P01112-P05771;P01112-P16234;P01112-P17252;P01112-P19174;P01112-P20936;P01112-P23458;P01112-P27361;P01112-P27986;P01112-P29353;P01112-P42336;P01112-P45983;P01112-Q02750;P01112-…
PKC-catalyzed phosphorylation of inhibitory phosphoprotein of myosin phosphatase	O15085;O60237;P05771;P10916;P17252;P50148;P62873;Q01449;Q03113;Q13464;Q14155;Q14344;Q15052;Q15746;Q6ZSZ5;Q92888;Q9NQ66;Q9NZN5	O15085-Q03113;O15085-Q14344;O60237-Q13464;P10916-O60237;P10916-Q13464;P10916-Q15746;P50148-P62873;P62873-P05771;P62873-P17252;P62873-Q9NQ66;Q01449-O60237;Q01449-Q13464;Q01449-Q15746;Q03113-P62873;Q03113-Q14344;Q14344-P05771;Q14344-P62873;Q14344-Q92888;Q15052-Q14155;Q15746-Q13464;Q6ZSZ5-P62873;Q92888-P50148;Q92888-Q03113;Q92888-Q14155;Q92888-Q15052;Q9NQ66-P05771;Q9NQ66-P17252;Q9NQ66-P50148;Q9NZN5-…
PTEN dependent cell cycle arrest and apoptosis	O15530;O43524;P05556;P27361;P27986;P28482;P29353;P31749;P42336;P46527;P48023;P56945;P60484;P62993;Q05397;Q07889;Q13418	O15530-P27986;O15530-P31749;O15530-P42336;O15530-P60484;O15530-Q13418;O43524-P29353;P05556-P29353;P05556-P31749;P05556-Q05397;P27361-P28482;P27361-P29353;P27361-Q05397;P27361-Q07889;P27986-P42336;P27986-P48023;P27986-P60484;P27986-P62993;P28482-Q05397;P28482-Q07889;P29353-P27986;P29353-P28482;P29353-P62993;P29353-Q07889;P31749-O43524;P31749-P27361;P31749-P27986;P31749-P28482;P31749-P29353;P31749-…
Pelp1 Modulation of Estrogen Receptor Activity	P03372;P12931;P27361;P28482;Q09472;Q8IZL8;Q92793	P03372-P27361;P12931-P03372;P12931-Q09472;P27361-P12931;P27361-P28482;P28482-P03372;P28482-P12931;Q09472-P03372;Q09472-P28482;Q09472-Q92793;Q8IZL8-P03372;Q8IZL8-P12931;Q8IZL8-Q09472;Q92793-P03372;Q92793-P12931;Q92793-Q8IZL8
Pertussis toxin-insensitive CCR5 Signaling in Macrophage	P01100;P05412;P05771;P13236;P13500;P17252;P19174;P45983;P48061;P50148;P51681;P61073;Q14289;Q16539	P01100-P05771;P01100-P17252;P01100-P45983;P01100-Q16539;P05412-P01100;P05412-P05771;P05412-P61073;P05412-Q16539;P05771-Q14289;P13236-P01100;P13236-P05412;P13236-P45983;P13236-P50148;P13236-P61073;P13500-P05412;P13500-P51681;P13500-P61073;P17252-Q14289;P19174-P05771;P19174-P17252;P45983-P05412;P45983-P05771;P45983-Q14289;P48061-P61073;P50148-P19174;P50148-P45983;P50148-Q16539;P51681-P05412;P51681-…
Phosphoinositides and their downstream targets.	O15530;O95782;P07948;P08237;P17858;P19174;P20339;P23443;P31749;P49840;P49841;P52735;P63000;P84077;Q01813;Q02156;Q05513;Q06187;Q15075;Q92934;Q92974;Q96CW1	O15530-P23443;O15530-P31749;O15530-Q05513;P07948-P52735;P07948-Q06187;P08237-P17858;P08237-Q01813;P19174-P52735;P19174-P63000;P19174-Q02156;P19174-Q05513;P23443-P31749;P23443-Q05513;P31749-P19174;P31749-P49841;P31749-P63000;P31749-Q01813;P31749-Q02156;P31749-Q92934;P49840-P49841;P63000-P23443;P63000-P52735;P84077-P63000;Q05513-P31749;Q05513-P63000;Q06187-P19174;Q06187-P52735;Q06187-P63000;Q15075-…
Phospholipase C Signaling Pathway	P05771;P15498;P17252;P19174;P27986;P31749;P42336;P48736;Q9NQ66	P15498-P27986;P19174-P05771;P19174-P15498;P19174-P17252;P27986-P19174;P27986-P42336;P27986-Q9NQ66;P31749-P05771;P31749-P17252;P31749-P19174;P31749-P27986;P31749-P42336;P31749-P48736;P42336-P05771;P42336-P15498;P42336-P17252;P42336-P19174;P42336-Q9NQ66;P48736-P05771;P48736-P15498;P48736-P17252;P48736-P19174;P48736-Q9NQ66;Q9NQ66-P05771;Q9NQ66-P17252
Phospholipase C d1 in phospholipid associated cell signaling	P05771;P17252;P21980;P35368;P51178	P35368-P21980;P51178-P05771;P51178-P17252;P51178-P21980
Phospholipase C-epsilon pathway	P07550;P10644;P13861;P22612;P22694;P31321;P31323;P63092;P84996;Q08828;Q5JWF2	P07550-P10644;P07550-P13861;P07550-P31323;P07550-P63092;P07550-P84996;P07550-Q5JWF2;P10644-P13861;P10644-P22694;P10644-P31321;P10644-P31323;P13861-P31323;P22612-P10644;P22694-P13861;P22694-P31323;Q08828-P07550;Q08828-P22612;Q08828-P22694;Q08828-P63092;Q08828-P84996;Q08828-Q5JWF2
Phospholipids as signalling intermediaries	P04085;P05106;P05771;P06756;P12931;P16234;P17252;P17405;P21453;P27361;P27986;P28482;P31749;P42336;P48736;P61586;P62873;P63000;P63096;Q05397;Q08828;Q13510;Q2M3C7;Q9NQ66;Q9NYA1	P04085-P12931;P04085-P27986;P04085-P42336;P04085-Q9NQ66;P04085-Q9NYA1;P05106-P05771;P05106-P12931;P05106-P17252;P05106-P27361;P05106-P27986;P05106-P28482;P05106-P42336;P05106-P61586;P05106-Q9NYA1;P05771-P12931;P05771-P61586;P05771-Q05397;P05771-Q9NYA1;P06756-P05106;P06756-P12931;P06756-P16234;P06756-P27361;P06756-P27986;P06756-P28482;P06756-P42336;P06756-P61586;P06756-Q05397;P06756-Q9NYA1;P12931-…
Phosphorylation of MEK1 by cdk5/p35 down regulates the MAP kinase pathway	P01112;P01138;P04049;P08138;P18146;P27361;P28482;P36507;Q00535;Q02750;Q15078	P01112-P04049;P01112-P27361;P01112-P28482;P01112-P36507;P01112-Q02750;P01138-P08138;P04049-P36507;P04049-Q02750;P18146-P28482;P18146-Q15078;P27361-P01138;P27361-P04049;P27361-P28482;P27361-Q02750;P28482-P01138;P28482-P04049;P28482-Q02750;P36507-P27361;P36507-P28482;Q00535-P18146;Q02750-P36507;Q15078-Q00535;Q15078-Q02750
Platelet Amyloid Precursor Protein Pathway	P00734;P00740;P00747;P00749;P00750;P02462;P03951;P05121;P08572;P29400;P53420;Q01955	P00734-P00740;P00734-P00749;P00734-P05121;P00749-P00747;P00749-P00750;P00749-P05121;P00750-P00734;P00750-P00747;P00750-P05121;P02462-P08572;P02462-P29400;P02462-P53420;P03951-P00734;P03951-P00740;P05121-P00747;P08572-P29400;P08572-P53420;P53420-P29400;Q01955-P29400;Q01955-P53420
Presenilin action in Notch and Wnt signaling	O14640;O15169;P04628;P20823;P25054;P35222;P46531;P49768;P49841;P78536;Q06330;Q9UP38;Q9Y297	O14640-O15169;O14640-P04628;O14640-P25054;O14640-P35222;O14640-P46531;O14640-P49841;O14640-Q9UP38;O15169-P25054;O15169-P35222;O15169-P46531;O15169-P49841;P25054-P35222;P25054-P46531;P25054-P49841;P35222-P04628;P35222-P20823;P35222-P46531;P35222-P49768;P35222-Q9UP38;P46531-Q06330;P49768-P46531;P49841-P35222;P49841-P46531;P49841-P49768;P49841-Q9Y297;P78536-P35222;P78536-P46531;P78536-P49768;Q9UP38-…
Protein Kinase A at the Centrosome	O95613;P06493;P13861;P22694;P31323;P61586;P67775;Q02156;Q16512;Q99996;Q9BW27	O95613-P31323;P06493-O95613;P06493-P31323;P06493-P67775;P06493-Q9BW27;P13861-P31323;P13861-P61586;P13861-Q02156;P22694-P13861;P22694-P31323;P31323-P61586;P31323-Q02156;Q02156-P61586;Q16512-P13861;Q16512-P31323;Q16512-P61586;Q16512-Q02156;Q16512-Q99996;Q99996-O95613;Q99996-P06493;Q99996-P13861;Q99996-P31323;Q9BW27-P67775
Proteolysis and Signaling Pathway of Notch	P09958;P46531;P49768;P78536;Q06330	P09958-P46531;P09958-P49768;P46531-Q06330;P49768-P46531;P78536-P09958;P78536-P46531;P78536-P49768
RB Tumor Suppressor/Checkpoint Signaling in response to DNA damage	O14757;P04637;P06400;P06493;P11802;P24941;P30291;P30305;P30307;Q01538;Q04917;Q13315;Q16539	O14757-P04637;O14757-P06400;O14757-P30291;O14757-P30305;O14757-P30307;P04637-Q16539;P06400-P04637;P06493-P04637;P06493-P06400;P06493-P30291;P06493-Q01538;P11802-P06400;P24941-P04637;P24941-P06400;P24941-P11802;P24941-P30291;P24941-P30305;P24941-Q16539;P30305-P06493;P30305-Q04917;P30305-Q16539;P30307-P06493;P30307-P24941;P30307-Q04917;Q13315-O14757;Q13315-P04637;Q13315-P11802;Q13315-P24941;Q16539-…
RNA polymerase III transcription	P20226;Q12789;Q92994;Q9UKN8;Q9Y5Q8;Q9Y5Q9	P20226-Q9UKN8;P20226-Q9Y5Q8;Q12789-P20226;Q12789-Q9Y5Q8;Q12789-Q9Y5Q9;Q92994-P20226;Q92994-Q12789;Q92994-Q9UKN8;Q9UKN8-Q12789;Q9UKN8-Q9Y5Q9;Q9Y5Q8-Q92994;Q9Y5Q8-Q9UKN8;Q9Y5Q9-P20226;Q9Y5Q9-Q92994;Q9Y5Q9-Q9Y5Q8
Rab GTPases Mark Targets In The Endocytotic Machinery	P20338;P20339;P51149;P61006;P62491	P51149-P20338;P51149-P20339;P62491-P61006
Rac 1 cell motility signaling pathway	O60237;O75962;P10916;P15498;P15882;P16234;P19878;P23443;P23528;P27986;P42336;P48736;P53365;P53667;P63000;Q00535;Q13153;Q13233;Q15078;Q15311;Q15746;Q92558	P10916-O60237;P10916-Q15746;P15498-P27986;P15498-P63000;P15882-P63000;P15882-Q15078;P16234-P42336;P16234-P48736;P19878-Q13153;P27986-P16234;P27986-P23443;P27986-P42336;P27986-P63000;P42336-P15498;P42336-P23443;P42336-P63000;P48736-P15498;P48736-P63000;P53365-P63000;P53667-P23528;P53667-P63000;P63000-O75962;P63000-P19878;P63000-P23443;P63000-Q92558;Q00535-Q13153;Q13153-O75962;Q13153-P15498;Q13153-…
Ras Signaling Pathway	O15111;P01112;P04049;P11233;P19419;P19838;P27361;P27986;P31749;P42336;P48736;P55211;P60953;P61586;P63000;P98177;Q02750;Q04206;Q07817;Q12967;Q13393;Q15311;Q92934	O15111-P27361;O15111-Q04206;P01112-P04049;P01112-P27361;P01112-P27986;P01112-P42336;P01112-P61586;P01112-P63000;P01112-Q02750;P01112-Q15311;P04049-P55211;P04049-P61586;P04049-Q02750;P04049-Q04206;P04049-Q07817;P11233-P01112;P19419-P19838;P19838-O15111;P19838-P04049;P19838-P27986;P19838-P42336;P19838-P63000;P19838-Q04206;P27361-P04049;P27361-P19419;P27361-P19838;P27361-P55211;P27361-P61586;P27361-…
Ras-Independent pathway in NK cell-mediated cytotoxicity	O43561;P04439;P05556;P15498;P26715;P26717;P27361;P27986;P29350;P30443;P42336;P43405;P61769;P63000;Q02750;Q13153;Q13241;Q14116;Q14289	O43561-P15498;O43561-P27986;O43561-P29350;O43561-P42336;O43561-P43405;O43561-P63000;O43561-Q13153;P04439-O43561;P04439-P15498;P04439-P26715;P04439-P26717;P04439-Q13241;P05556-P29350;P05556-P63000;P05556-Q13153;P05556-Q14289;P15498-P27986;P15498-P63000;P26715-P29350;P26717-O43561;P26717-P27986;P26717-P42336;P26717-P43405;P27361-P29350;P27361-P63000;P27361-Q02750;P27986-P42336;P27986-P43405;P27986-…
Reelin Signaling Pathway	O75553;P06241;P78509;P98155;Q00535;Q14114;Q15078	O75553-P06241;O75553-P78509;O75553-P98155;O75553-Q14114;P06241-P78509;P06241-P98155;P06241-Q14114;P78509-P98155;Q00535-P06241;Q14114-P78509;Q14114-P98155;Q15078-P06241;Q15078-Q00535
Regulation And Function Of ChREBP in Liver	O43741;P10644;P13861;P17612;P22612;P22694;P27348;P30153;P30154;P30613;P31321;P31323;P31946;P35557;P54619;P54646;P61981;P62258;P62714;P63104;P63151;P67775;Q00005;Q04917;Q06190;Q13085;Q13131;Q13362;Q14738;Q15172;Q15173;Q15257;Q16537;Q9NP71;Q9UGI9;Q9UGJ0;Q9UH92;Q9Y2T4;Q9Y478;Q9Y5P8	O43741-P54646;O43741-Q13131;O43741-Q9UGI9;P10644-P13861;P10644-P22694;P10644-P31321;P10644-P31323;P13861-P31323;P17612-P10644;P17612-P13861;P17612-P22612;P17612-P22694;P17612-P31321;P17612-P31323;P17612-P61981;P17612-P62258;P17612-P63104;P22612-P10644;P22694-P13861;P22694-P31323;P27348-P31946;P27348-P62258;P30153-P17612;P30153-P27348;P30153-P30154;P30153-P31323;P30153-P31946;P30153-P61981;P30153-…
Regulation of BAD phosphorylation	P05019;P08069;P08700;P10415;P10644;P10721;P13861;P21583;P22612;P22694;P26951;P27361;P27986;P28482;P31321;P31323;P31749;P32927;P42336;P48736;Q04917;Q07812;Q07817;Q08828;Q15418;Q92934	P05019-P08069;P05019-P10721;P05019-P27361;P05019-P27986;P05019-P28482;P05019-P42336;P05019-P48736;P05019-Q04917;P05019-Q15418;P08069-P21583;P08069-P22612;P08069-P22694;P08069-P27361;P08069-P28482;P08069-P42336;P08069-P48736;P08069-Q04917;P08700-P22612;P08700-P22694;P08700-P27986;P08700-P32927;P08700-P42336;P10415-P10644;P10415-P13861;P10415-P27361;P10415-P31323;P10644-P13861;P10644-P22694;P10644-…
Regulation of MAP Kinase Pathways Through Dual Specificity Phosphatases	P27361;P28562;P45983;Q16539	P27361-P28562;P27361-P45983;P27361-Q16539;P28562-Q16539;P45983-P28562
Regulation of PGC-1a	P11474;P14672;P48454;P62158;Q02078;Q02080;Q04917;Q06413;Q07869;Q13554;Q13555;Q13557;Q14012;Q14814;Q16566;Q9UBK2;Q9UQL6;Q9UQM7	P11474-Q02080;P11474-Q06413;P11474-Q07869;P11474-Q14814;P11474-Q9UBK2;P14672-Q04917;P48454-Q04917;Q02078-Q06413;Q02080-P48454;Q02080-Q9UBK2;Q06413-P48454;Q06413-Q9UBK2;Q13554-P48454;Q13554-Q02080;Q13554-Q06413;Q13554-Q13555;Q13554-Q13557;Q13554-Q14814;Q13554-Q16566;Q13555-P62158;Q13557-Q02080;Q13557-Q06413;Q13557-Q13555;Q13557-Q14814;Q14012-P62158;Q14012-Q9UQL6;Q14814-P48454;Q14814-Q02078;Q14814-…
Regulation of Spermatogenesis by CREM	P01225;P23945;P63092;P84996;Q03060;Q08828;Q5JWF2;Q5TD97	P01225-P63092;P01225-P84996;P01225-Q5JWF2;P23945-P01225;P23945-P63092;P23945-P84996;P23945-Q5JWF2;Q08828-P63092;Q08828-P84996;Q08828-Q5JWF2;Q5TD97-Q03060
Regulation of Splicing through Sam68	P01112;P12931;P20936;P27361;P28482	P01112-P12931;P01112-P20936;P01112-P27361;P01112-P28482;P12931-P20936;P27361-P12931;P27361-P28482;P28482-P12931
Regulation of cell cycle progression by Plk3	O14757;O96017;P04637;P30307;Q04917;Q13315;Q13535;Q9H4B4	O14757-P04637;O14757-P30307;P04637-O96017;P30307-O96017;P30307-Q04917;Q13315-O14757;Q13315-O96017;Q13315-P04637;Q13535-O14757;Q13535-O96017;Q13535-P04637;Q13535-Q13315;Q9H4B4-O96017;Q9H4B4-P04637;Q9H4B4-P30307
Regulation of ck1/cdk5 by type 1 glutamate receptors	P10644;P13861;P14416;P22612;P22694;P31321;P31323;P48730;P62136;P67775;Q00535;Q08209;Q13255;Q15078;Q9NQ66;Q9UD71	P10644-P13861;P10644-P22694;P10644-P31321;P10644-P31323;P13861-P31323;P14416-P67775;P22612-P10644;P22694-P13861;P22694-P31323;P48730-P31323;P48730-P67775;P48730-Q9UD71;Q00535-Q9UD71;Q13255-Q08209;Q13255-Q9NQ66;Q15078-P48730;Q15078-Q00535;Q15078-Q9UD71;Q9NQ66-Q08209;Q9UD71-P10644;Q9UD71-P13861;Q9UD71-P22612;Q9UD71-P22694;Q9UD71-P31323;Q9UD71-P62136;Q9UD71-P67775;Q9UD71-Q08209
Regulation of eIF2	P05198;P19525;P20042;P41091;P49841;P55010;P62136;Q13144;Q9BQI3;Q9NZJ5;Q9P2K8	P05198-P19525;P05198-P41091;P05198-P55010;P19525-P20042;P20042-P05198;P20042-P41091;P20042-P55010;P41091-P55010;P62136-P19525;P62136-P49841;Q13144-P05198;Q13144-P20042;Q13144-P41091;Q9BQI3-P05198;Q9BQI3-P62136;Q9NZJ5-P05198;Q9NZJ5-P62136;Q9P2K8-P05198;Q9P2K8-P20042;Q9P2K8-P62136
Regulation of eIF4e and p70 S6 Kinase	O15530;O43432;P05771;P06730;P10912;P11940;P17252;P23443;P27361;P27986;P28482;P31749;P35568;P42336;P42345;P60484;P60842;P78344;Q04637;Q13541;Q14240;Q16539;Q9BUB5	O15530-P05771;O15530-P17252;O15530-P23443;O15530-P27986;O15530-P31749;O15530-P42336;O15530-P60484;O43432-P11940;O43432-P60842;P05771-P23443;P06730-O43432;P06730-P11940;P06730-P23443;P06730-P42345;P06730-Q16539;P10912-P27361;P10912-P27986;P10912-P28482;P10912-P35568;P17252-P23443;P23443-P31749;P23443-P42345;P27361-P05771;P27361-P17252;P27361-P28482;P27361-Q16539;P27361-Q9BUB5;P27986-P23443;P27986-…
Regulation of hematopoiesis by cytokines	P01732;P04141;P05113;P08700;P60568	P01732-P60568;P04141-P05113;P04141-P08700;P08700-P05113
Regulation of transcriptional activity by PML	P01112;P01375;P04637;P06400;P10276;P19438;P20333;P23497;P23760;P25445;P29590;P48023;P63165;Q92793;Q96EB6;Q96QH2;Q9UER7	P01112-P04637;P01375-P19438;P01375-P20333;P01375-Q96EB6;P04637-P29590;P04637-Q96EB6;P06400-P04637;P06400-P29590;P06400-Q96EB6;P10276-P29590;P10276-P63165;P19438-P20333;P23760-P06400;P23760-Q9UER7;P25445-P01375;P25445-P04637;P25445-P19438;P29590-P23497;P29590-P25445;P29590-Q96EB6;P29590-Q96QH2;P48023-P01375;P48023-P19438;P48023-P25445;P63165-P04637;P63165-P19438;P63165-P23497;P63165-P25445;P63165-…
Regulators of Bone Mineralization	P02462;P08572;P29400;P53420;Q01955	P02462-P08572;P02462-P29400;P02462-P53420;P08572-P29400;P08572-P53420;P53420-P29400;Q01955-P29400;Q01955-P53420
Repression of Pain Sensation by the Transcriptional Regulator DREAM	P01100;P05412;P10644;P13861;P16220;P22612;P22694;P24928;P27361;P31321;P31323;Q03060;Q9Y2W7	P01100-P24928;P01100-P27361;P01100-Q9Y2W7;P05412-P01100;P05412-P24928;P05412-Q9Y2W7;P10644-P13861;P10644-P22694;P10644-P31321;P10644-P31323;P13861-P31323;P16220-P01100;P16220-P05412;P16220-P22612;P16220-P22694;P16220-P27361;P22612-P10644;P22694-P13861;P22694-P31323;P27361-P05412;P27361-P22612;P27361-P22694;Q03060-P01100;Q03060-P05412;Q03060-P10644;Q03060-P13861;Q03060-P16220;Q03060-P22612;Q03060-…
Reversal of Insulin Resistance by Leptin	O43741;P41159;P48357;P54619;P54646;Q13085;Q13131;Q9UGI9;Q9UGJ0;Q9Y478	O43741-P54646;O43741-Q13131;O43741-Q9UGI9;P41159-Q13131;P48357-O43741;P48357-P41159;P48357-P54619;P48357-P54646;P48357-Q13131;P48357-Q9UGI9;P48357-Q9UGJ0;P48357-Q9Y478;P54619-O43741;P54619-P54646;P54619-Q13131;P54619-Q9Y478;P54646-Q13085;P54646-Q13131;P54646-Q9UGI9;Q13085-O43741;Q13085-P54619;Q13085-Q9UGI9;Q13085-Q9UGJ0;Q13085-Q9Y478;Q13131-Q13085;Q9UGI9-Q13131;Q9UGJ0-O43741;Q9UGJ0-P54619;Q9UGJ0-…
Rho cell motility signaling pathway	O14986;O15085;O15143;O15144;O15145;O15511;O43182;O60237;O60610;O60890;P06396;P07737;P10916;P12931;P18206;P23528;P53667;P59998;P61158;P61160;P61586;Q07960;Q12774;Q13017;Q13464;Q15746;Q92747;Q92888;Q99755;Q9UQB8;Q9Y490	O14986-P18206;O14986-Q13464;O15085-P61586;O15143-O15144;O15143-O15145;O15143-O15511;O15143-P18206;O15143-P59998;O15143-P61160;O15144-O15145;O15144-O15511;O15144-P18206;O15144-P59998;O15144-P61160;O15144-Q92747;O15144-Q9UQB8;O15145-O15511;O15145-P18206;O15145-P61158;O15145-Q9UQB8;O15511-P18206;O15511-Q9UQB8;O43182-P61586;O60237-Q13464;O60610-P07737;O60890-P61586;P06396-O14986;P06396-Q99755;P07737-…
Rho-Selective Guanine Exchange Factor AKAP13 Mediates Stress Fiber Formation	P13861;P22694;P31323;P61586;Q03113;Q12802;Q14344;Q92633;Q9HBW0	P13861-P31323;P13861-P61586;P22694-P13861;P22694-P31323;P31323-P61586;P61586-Q03113;Q03113-Q14344;Q03113-Q92633;Q12802-P13861;Q12802-P31323;Q12802-P61586;Q12802-Q03113;Q12802-Q92633;Q14344-P61586;Q14344-Q92633;Q9HBW0-P61586
Role of BRCA1, BRCA2 and ATR in Cancer Susceptibility	O14757;O15287;O60671;O60921;O60934;O75943;O96017;P04637;P38398;P49959;P51587;Q00597;Q06609;Q13315;Q13535;Q92878;Q99638;Q9BXW9;Q9HB96;Q9NPI8;Q9NSU2	O14757-O15287;O14757-O60671;O14757-O60921;O14757-O75943;O14757-P04637;O14757-P38398;O14757-Q00597;O14757-Q06609;O14757-Q99638;O14757-Q9HB96;O14757-Q9NPI8;O15287-O60671;O15287-O60921;O15287-O75943;O15287-P51587;O15287-Q00597;O15287-Q99638;O15287-Q9HB96;O60671-Q9NSU2;O60921-O60671;O60921-O60934;O60921-Q9NSU2;O60934-O60671;O60934-O75943;O60934-P38398;O60934-P49959;O60934-Q99638;O75943-O60671;O75943-…
Role of EGF Receptor Transactivation by GPCRs in Cardiac Hypertrophy	O43184;P00533;P01019;P01100;P01106;P01112;P01133;P05305;P05412;P05771;P17252;P19174;P19838;P24530;P25101;P30556;P61586;Q04206	O43184-P01133;O43184-P05771;O43184-P17252;P00533-P01100;P00533-P01112;P00533-P01133;P00533-P05771;P00533-P19174;P00533-Q04206;P01019-P01106;P01019-P30556;P01100-P01112;P01100-P05771;P01100-P17252;P01100-P19838;P01100-Q04206;P01106-P05412;P01106-P05771;P01106-P19838;P01106-Q04206;P01112-P05412;P01112-P05771;P01112-P17252;P01112-P19174;P01112-P61586;P01133-P01112;P01133-P05771;P01133-P17252;P01133-…
Role of ERBB2 in Signal Transduction and Oncology	P00533;P01112;P03372;P04049;P05231;P08887;P21860;P27361;P27986;P28482;P29353;P40189;P40763;P42336;P48736;P62993;Q02750;Q07889;Q09472;Q15303;Q86X55;Q9Y3R0	P00533-P01112;P00533-P27361;P00533-P28482;P00533-P40763;P00533-P42336;P00533-P48736;P00533-P62993;P00533-Q02750;P00533-Q15303;P01112-P04049;P01112-P27361;P01112-P27986;P01112-P28482;P01112-P29353;P01112-P42336;P01112-Q02750;P01112-Q07889;P03372-P00533;P03372-P27361;P03372-P40763;P03372-P42336;P03372-P62993;P03372-Q07889;P03372-Q9Y3R0;P04049-P29353;P04049-Q02750;P04049-Q07889;P05231-P27361;P05231-…
Role of Erk5 in Neuronal Survival	P01112;P04629;P16220;P19174;P27361;P27986;P28482;P29353;P31749;P42336;P48736;P62993;Q02078;Q02080;Q06413;Q13164;Q14814;Q15418	P01112-P04629;P01112-P19174;P01112-P27361;P01112-P27986;P01112-P28482;P01112-P29353;P01112-P42336;P01112-Q15418;P04629-P19174;P04629-P27986;P04629-P29353;P04629-P42336;P04629-P48736;P04629-P62993;P16220-P19174;P16220-P27361;P16220-P28482;P16220-P29353;P16220-P62993;P16220-Q06413;P16220-Q14814;P19174-P29353;P19174-P62993;P27361-P04629;P27361-P28482;P27361-P29353;P27361-Q15418;P27986-P19174;P27986-…
Role of MAL in Rho-Mediated Activation of SRF	O60610;P01112;P04049;P11831;P20823;P21145;P27361;P28482;P36507;P45983;P53667;P60953;P61586;P63000;P68133;Q02750;Q12851;Q13233;Q13464	O60610-P21145;P01112-P04049;P01112-P27361;P01112-P28482;P01112-P36507;P01112-P45983;P01112-P61586;P01112-P63000;P01112-Q02750;P01112-Q13233;P04049-P11831;P04049-P36507;P04049-P61586;P04049-Q02750;P04049-Q13233;P20823-P21145;P20823-P45983;P27361-P04049;P27361-P28482;P27361-P45983;P27361-P61586;P27361-P63000;P27361-Q02750;P27361-Q13464;P28482-P04049;P28482-P11831;P28482-P45983;P28482-P61586;P28482-…
Role of MEF2D in T-cell Apoptosis	O95644;P04632;P05771;P16298;P17252;P17655;P48454;Q08209;Q09472;Q13469;Q13547;Q14814;Q92769;Q9Y6J0	O95644-P16298;O95644-P48454;O95644-Q08209;O95644-Q13469;P17655-P04632;Q09472-P05771;Q09472-Q13469;Q09472-Q13547;Q09472-Q92769;Q13469-P16298;Q13469-P48454;Q13469-Q08209;Q14814-O95644;Q14814-P48454;Q14814-Q09472;Q14814-Q13469;Q92769-P05771;Q92769-Q13547;Q92769-Q14814;Q9Y6J0-P05771;Q9Y6J0-P16298;Q9Y6J0-P17252;Q9Y6J0-P48454;Q9Y6J0-Q08209;Q9Y6J0-Q09472;Q9Y6J0-Q13469;Q9Y6J0-Q14814;Q9Y6J0-Q92769
Role of Mitochondria in Apoptotic Signaling	O00273;O14727;O76075;O95831;P10415;P42574;P55210;P55211;P55212;P55957;P98170;P99999;Q07812;Q07817;Q13323;Q13489;Q13490;Q14790;Q16611;Q9NR28	O14727-P10415;O14727-P42574;O14727-P55210;O14727-P55212;O14727-P98170;O14727-P99999;O14727-Q07812;O14727-Q07817;O14727-Q13323;O14727-Q13489;O14727-Q13490;O14727-Q14790;O14727-Q16611;O14727-Q9NR28;O76075-O00273;O95831-P10415;O95831-Q07812;O95831-Q07817;O95831-Q16611;P10415-P55211;P10415-P99999;P10415-Q9NR28;P42574-O00273;P42574-O76075;P42574-P10415;P42574-P55957;P42574-P98170;P42574-P99999;P42574-…
Role of PI3K subunit p85 in regulation of Actin Organization and Cell Migration	O00401;O15143;O15144;O15145;O15511;P16234;P27986;P42336;P59998;P60953;P61158;P61160;P61586;P63000;Q13153;Q92747	O00401-O15143;O00401-P60953;O00401-P61160;O15143-O15144;O15143-O15145;O15143-O15511;O15143-P59998;O15143-P61160;O15144-O00401;O15144-O15145;O15144-O15511;O15144-P59998;O15144-P60953;O15144-P61160;O15144-P63000;O15144-Q92747;O15145-O00401;O15145-O15511;O15145-P60953;O15145-P61158;O15145-P63000;O15511-O00401;O15511-P60953;O15511-P63000;P16234-P42336;P27986-P16234;P27986-P42336;P27986-P60953;P27986-…
Role of PPAR-gamma Coactivators in Obesity and Thermogenesis	P06858;P19793;P37231;Q09472;Q15596;Q15648;Q15788;Q92793;Q9UBK2	P06858-P19793;P06858-P37231;P37231-P19793;P37231-Q15788;P37231-Q92793;Q09472-P19793;Q09472-P37231;Q09472-Q15596;Q09472-Q15648;Q09472-Q15788;Q09472-Q92793;Q09472-Q9UBK2;Q15596-P19793;Q15596-P37231;Q15596-Q9UBK2;Q15648-P19793;Q15648-P37231;Q15648-Q15596;Q15648-Q15788;Q15788-P19793;Q15788-Q15596;Q15788-Q92793;Q92793-P19793;Q92793-Q15596;Q92793-Q15648;Q9UBK2-P19793;Q9UBK2-P37231;Q9UBK2-Q15648;Q9UBK2-…
Role of Parkin in the Ubiquitin-Proteasomal Pathway	O14933;O15354;O60260;P37840;P60604;P62253;P63165;P68036;Q969M7;Q96LR5;Q99719;Q9Y6H5	O14933-O60260;O15354-O60260;O15354-P60604;O15354-P62253;O60260-P37840;O60260-P60604;O60260-P62253;O60260-Q969M7;O60260-Q9Y6H5;P37840-O14933;P37840-P68036;P63165-O14933;P63165-P60604;P63165-P62253;P63165-P68036;P63165-Q96LR5;P68036-O60260;Q96LR5-O60260;Q99719-O14933;Q99719-O60260;Q9Y6H5-O14933;Q9Y6H5-P37840
Role of Ran in mitotic spindle regulation	O14965;P18754;P43487;P46060;P52292;P62826;Q14974;Q9NS87;Q9ULW0	P43487-P46060;P43487-P62826;P43487-Q14974;P46060-P62826;P52292-P18754;P52292-Q14974;P52292-Q9ULW0;P62826-P18754;P62826-Q9ULW0;Q14974-P62826;Q14974-Q9ULW0;Q9NS87-Q9ULW0;Q9ULW0-O14965
Role of Tob in T-cell activation	P01137;P01589;P04234;P05112;P07766;P09693;P10600;P10747;P20963;P36897;P37173;P50616;P60568;P61812;P84022;Q03167;Q13485	P01589-P05112;P04234-P01589;P04234-P09693;P04234-P60568;P07766-P01589;P07766-P04234;P07766-P60568;P09693-P01589;P09693-P07766;P09693-P60568;P10600-P36897;P10600-P37173;P10747-P04234;P10747-P07766;P10747-P09693;P20963-P01589;P20963-P04234;P20963-P07766;P20963-P09693;P20963-P10747;P20963-P60568;P36897-P01137;P36897-Q03167;P37173-P01137;P37173-P36897;P50616-P84022;P50616-Q13485;P60568-P01137;P60568-…
Role of b-arrestins in the activation and targeting of MAP kinases	P04049;P27361;P28482;P36507;P49407;P62873;P63092;P84996;Q02750;Q05193;Q08828;Q5JWF2;Q9NQ66	P04049-P36507;P04049-Q02750;P27361-P04049;P27361-P28482;P27361-Q02750;P28482-P04049;P28482-Q02750;P36507-P27361;P36507-P28482;P49407-P27361;P49407-P28482;P49407-Q05193;P62873-P27361;P62873-P28482;P62873-Q9NQ66;P63092-P62873;P84996-P62873;Q02750-P36507;Q08828-P62873;Q08828-P63092;Q08828-P84996;Q08828-Q5JWF2;Q5JWF2-P62873
Role of nicotinic acetylcholine receptors in the regulation of apoptosis	O14746;O15146;O43524;P07510;P11230;P12931;P27986;P31749;P42336;P48023;P48736;Q04917;Q05397;Q13702;Q14289;Q92934	O15146-P12931;O15146-Q13702;P07510-O15146;P07510-P12931;P07510-Q13702;P11230-O15146;P11230-P07510;P11230-P12931;P11230-Q13702;P12931-P27986;P12931-P48023;P12931-Q05397;P27986-P42336;P27986-P48023;P27986-Q14289;P31749-O14746;P31749-O43524;P31749-P12931;P31749-P27986;P31749-P42336;P31749-P48023;P31749-P48736;P31749-Q04917;P31749-Q92934;P42336-P12931;P42336-Q05397;P42336-Q14289;P48023-O43524;P48736-…
Roles of b-arrestin-dependent Recruitment of Src Kinases in GPCR Signaling	P01112;P04049;P08631;P12931;P27361;P28482;P36507;P49407;P62873;P63092;P84996;Q02750;Q05193;Q08828;Q5JWF2;Q9NQ66	P01112-P04049;P01112-P12931;P01112-P27361;P01112-P28482;P01112-P36507;P01112-Q02750;P04049-P36507;P04049-Q02750;P12931-P04049;P12931-Q05193;P27361-P04049;P27361-P12931;P27361-P28482;P27361-Q02750;P28482-P04049;P28482-P12931;P28482-Q02750;P36507-P27361;P36507-P28482;P49407-P08631;P49407-P12931;P49407-P27361;P49407-P28482;P49407-Q05193;P62873-P01112;P62873-P08631;P62873-P12931;P62873-P27361;P62873-…
SODD/TNFR1 Signaling Pathway	O95429;P01375;P19438;P20333;Q12933;Q13158;Q13489;Q13546;Q14790;Q15628	O95429-P01375;O95429-P19438;O95429-Q12933;O95429-Q13158;O95429-Q13489;O95429-Q13546;O95429-Q15628;P01375-P19438;P01375-P20333;P01375-Q13546;P01375-Q15628;P19438-P20333;P19438-Q13489;P20333-Q15628;Q12933-P01375;Q12933-P19438;Q12933-P20333;Q12933-Q13158;Q12933-Q13489;Q12933-Q15628;Q13158-P01375;Q13158-P19438;Q13158-Q14790;Q13489-P01375;Q13489-P20333;Q13489-Q13158;Q13489-Q14790;Q13489-Q15628;Q13546-…
SREBP control of lipid synthesis	O43462;P01130;P36956;Q01581;Q12770;Q12772;Q14703	O43462-P36956;O43462-Q12772;P01130-P36956;P01130-Q12772;P36956-Q12772;Q01581-P36956;Q01581-Q12772;Q12770-P36956;Q12770-Q12772;Q14703-P36956;Q14703-Q12770;Q14703-Q12772
SUMOylation as a mechanism to modulate CtBP-dependent gene responses	P12830;P37275;P63165;P63279;Q13363;Q9UBE0;Q9UBT2	P37275-P12830;P63165-P37275;P63165-Q9UBE0;P63165-Q9UBT2;P63279-P63165;P63279-Q9UBE0;P63279-Q9UBT2;Q13363-P37275;Q9UBE0-Q9UBT2
Segmentation Clock	O14640;P04628;P46531;P49841;Q06330;Q9UP38	O14640-P04628;O14640-P46531;O14640-P49841;O14640-Q9UP38;P46531-Q06330;P49841-P46531;Q9UP38-P04628
Selective expression of chemokine receptors during T-cell polarization	P01137;P01579;P01730;P04141;P05112;P05113;P10147;P10747;P13236;P15260;P24394;P29459;P29460;P29965;P32246;P38484;P42701;P49682;P51677;P51679;P51681;P60568;P61073;P61812;Q13478;Q99665	P01579-P15260;P01579-P29459;P01579-P29460;P01579-P38484;P01579-P42701;P01579-Q99665;P01730-P29459;P01730-P29460;P01730-P42701;P01730-P61073;P01730-Q99665;P04141-P05113;P10147-P32246;P10147-P49682;P10147-P51677;P10147-P61073;P10747-P01730;P13236-P10147;P13236-P32246;P13236-P49682;P13236-P51677;P13236-P51679;P13236-P61073;P15260-P38484;P24394-P05112;P29459-P05112;P29459-P60568;P29459-Q13478;P29459-…
Signal Dependent Regulation of Myogenesis by Corepressor MITR	P15172;Q02078;Q02080;Q04917;Q06413;Q14814;Q9UKV0	P15172-Q06413;Q02078-P15172;Q02078-Q06413;Q02080-P15172;Q06413-Q9UKV0;Q14814-P15172;Q14814-Q02078;Q9UKV0-Q02078;Q9UKV0-Q02080;Q9UKV0-Q04917;Q9UKV0-Q14814
Signal transduction through IL1R	O14920;O15111;O43187;O43318;P01137;P01375;P01562;P01574;P01583;P01584;P05231;P05412;P10600;P14778;P18510;P19838;P25963;P45983;P46734;P51617;P52564;P61812;Q04206;Q13233;Q15750;Q16539;Q99558;Q99836;Q9BQ95;Q9H0E2;Q9NPH3;Q9Y4K3;Q9Y616	O14920-O43187;O14920-P19838;O14920-P25963;O14920-Q04206;O14920-Q15750;O14920-Q99836;O14920-Q9Y4K3;O14920-Q9Y616;O15111-O14920;O15111-O43187;O15111-P01375;O15111-P01583;O15111-P14778;O15111-P45983;O15111-Q04206;O15111-Q15750;O15111-Q99836;O15111-Q9Y4K3;O43187-O43318;O43187-P14778;O43187-P51617;O43187-P52564;O43187-Q15750;O43187-Q99558;O43187-Q99836;O43187-Q9Y4K3;O43318-O14920;O43318-O15111;O43318-…
Signaling Pathway from G-Protein Families	O95644;P01100;P01112;P04049;P05412;P05771;P10644;P13861;P16220;P16298;P17252;P19174;P19419;P22612;P22694;P27361;P31321;P31323;P48454;P50148;P51812;P62873;P63092;P63096;P84996;Q02750;Q08209;Q08828;Q12968;Q13469;Q14934;Q5JWF2	O95644-P16298;O95644-P48454;O95644-Q08209;O95644-Q12968;O95644-Q13469;P01100-O95644;P01100-P01112;P01100-P05771;P01100-P17252;P01100-P27361;P01100-P51812;P01100-Q12968;P01100-Q13469;P01112-P04049;P01112-P05412;P01112-P05771;P01112-P17252;P01112-P19174;P01112-P27361;P01112-P51812;P01112-Q02750;P04049-Q02750;P05412-O95644;P05412-P01100;P05412-P05771;P05412-Q12968;P05412-Q13469;P05771-P04049;P10644-…
Signaling of Hepatocyte Growth Factor Receptor	P01100;P01112;P04049;P05412;P05556;P08581;P12931;P14210;P19419;P20936;P27361;P27986;P28482;P36507;P40763;P42336;P45983;P46108;P46109;P48736;P49023;P56199;P60484;P61224;P62834;P62993;P68133;Q02750;Q05397;Q06124;Q07889;Q13153;Q13480;Q13905;Q14185;Q14289;Q92918	P01100-P01112;P01100-P27361;P01100-P40763;P01100-P45983;P01112-P04049;P01112-P05412;P01112-P08581;P01112-P12931;P01112-P20936;P01112-P27361;P01112-P27986;P01112-P28482;P01112-P36507;P01112-P42336;P01112-P45983;P01112-Q02750;P01112-Q05397;P01112-Q06124;P01112-Q07889;P01112-Q14289;P04049-P20936;P04049-P36507;P04049-Q02750;P04049-Q07889;P05412-P01100;P05412-P28482;P05412-P40763;P05556-P12931;P05556-…
Skeletal muscle hypertrophy is regulated via AKT/mTOR pathway	O15357;O15530;P05019;P05198;P06730;P08069;P20042;P23443;P27986;P31749;P41091;P42336;P42345;P49841;P60484;P62753;P67775;Q13144;Q13541	O15357-P27986;O15357-P42336;O15357-P60484;O15530-P23443;O15530-P27986;O15530-P31749;O15530-P42336;O15530-P60484;O15530-P67775;P05019-P08069;P05019-P23443;P05019-P27986;P05019-P42336;P05198-P06730;P05198-P41091;P05198-P62753;P06730-P23443;P06730-P42345;P06730-P62753;P08069-P23443;P08069-P42336;P20042-P05198;P20042-P06730;P20042-P41091;P20042-P62753;P23443-P31749;P23443-P42345;P23443-P62753;P27986-…
Sonic Hedgehog (SHH) Receptor Ptc1 Regulates cell cycle	O14980;P06493;P14635;P30304;P30305;P30307;P50613;P51946;P51948;Q13635;Q15465	P06493-O14980;P06493-P51948;P14635-O14980;P14635-P06493;P14635-P30304;P14635-P30305;P14635-P50613;P14635-P51946;P14635-P51948;P14635-Q13635;P14635-Q15465;P30304-P06493;P30305-P06493;P30307-P06493;P30307-P14635;P50613-P51946;P50613-P51948;P51946-P06493;P51946-P51948;Q13635-Q15465
Sonic Hedgehog (Shh) Pathway	P08151;P10070;P10071;P10644;P13861;P22612;P22694;P31321;P31323;P49841;Q13635;Q15465;Q99835;Q9UMX1	P08151-P10070;P08151-P10071;P08151-P22612;P08151-P22694;P08151-P49841;P08151-Q13635;P08151-Q99835;P10070-P22612;P10070-P22694;P10070-P49841;P10070-Q13635;P10070-Q15465;P10070-Q99835;P10071-P22612;P10071-P22694;P10071-P49841;P10071-Q13635;P10071-Q99835;P10644-P13861;P10644-P22694;P10644-P31321;P10644-P31323;P10644-Q9UMX1;P13861-P31323;P13861-Q9UMX1;P22612-P10644;P22694-P13861;P22694-P31323;P31321-…
Sprouty regulation of tyrosine kinase signals	O43597;O43609;P00533;P01112;P01133;P04049;P12931;P20936;P22681;P23467;P27361;P28482;P29353;P62993;Q02750;Q07889;Q9C004	O43597-P12931;O43597-P22681;O43597-P62993;O43609-P22681;O43609-P62993;P00533-O43597;P00533-O43609;P00533-P01112;P00533-P01133;P00533-P20936;P00533-P22681;P00533-P27361;P00533-P28482;P00533-P62993;P00533-Q02750;P00533-Q9C004;P01112-P04049;P01112-P12931;P01112-P20936;P01112-P27361;P01112-P28482;P01112-P29353;P01112-Q02750;P01112-Q07889;P01133-O43597;P01133-O43609;P01133-P01112;P01133-P12931;P01133-…
Stat3 Signaling Pathway	O60674;P23458;P27361;P28482;P29597;P40763;P42345;P52333	O60674-P27361;O60674-P28482;O60674-P29597;O60674-P40763;O60674-P42345;P23458-O60674;P23458-P27361;P23458-P28482;P23458-P29597;P23458-P40763;P27361-P28482;P27361-P40763;P28482-P40763;P40763-P29597;P42345-P29597;P42345-P40763;P52333-O60674;P52333-P23458;P52333-P27361;P52333-P28482;P52333-P40763
Stathmin and breast cancer resistance to antimicrotubule agents	O15264;P04234;P06493;P07766;P09693;P10644;P13861;P14635;P20963;P22612;P22694;P31321;P31323;Q13554;Q13555;Q13557;Q16566;Q9UQM7	O15264-P22612;O15264-P22694;P04234-P09693;P06493-P31323;P07766-P04234;P09693-P07766;P10644-P13861;P10644-P22694;P10644-P31321;P10644-P31323;P13861-P31323;P14635-P06493;P14635-P13861;P14635-P31323;P20963-P04234;P20963-P07766;P20963-P09693;P22612-P10644;P22694-P13861;P22694-P31323;Q13554-Q13555;Q13554-Q13557;Q13554-Q16566;Q13557-Q13555;Q9UQM7-Q13554;Q9UQM7-Q13555;Q9UQM7-Q13557
Stress Induction of HSP Regulation	O14727;P01375;P01583;P04792;P10415;P25445;P42574;P48023;P49137;P55211;P68133;P99999;Q16644;Q9UER7	O14727-P10415;O14727-P42574;O14727-P99999;P01583-P01375;P01583-P49137;P04792-P99999;P04792-Q9UER7;P10415-P04792;P10415-P55211;P10415-P99999;P25445-P01375;P42574-P10415;P42574-P99999;P48023-P01375;P48023-P04792;P48023-P25445;P49137-P01375;P49137-P04792;P55211-O14727;P55211-P42574;P55211-P99999;P68133-P04792;P68133-P42574;Q16644-P04792;Q9UER7-P01375;Q9UER7-P25445;Q9UER7-P48023
Sumoylation by RanBP2 Regulates Transcriptional Repression	O75925;P46060;P49792;P62826;P63165;Q00987;Q13547;Q9UBN7;Q9UKV0	O75925-P63165;P46060-P49792;P46060-P62826;P46060-P63165;P49792-P62826;P49792-P63165;P63165-P62826;P63165-Q00987;Q00987-O75925;Q00987-P46060;Q00987-P49792;Q13547-P46060;Q13547-P49792;Q13547-P62826;Q13547-P63165;Q13547-Q00987;Q9UBN7-P62826;Q9UBN7-P63165;Q9UKV0-P62826;Q9UKV0-Q13547
T Cell Receptor Signaling Pathway	O43561;O95644;P01100;P01112;P04049;P04234;P05412;P05771;P06239;P06241;P07766;P09693;P15498;P16298;P17252;P19174;P19419;P19838;P20936;P20963;P25963;P27361;P27986;P29353;P35236;P42336;P43403;P45983;P45985;P48454;P48736;P62158;P62993;P63000;Q02750;Q04206;Q07889;Q08209;Q12968;Q13233;Q13469;Q14934	O43561-P15498;O43561-P19174;O43561-P19838;O43561-P27986;O43561-P29353;O43561-P42336;O43561-P48736;O43561-P62993;O43561-P63000;O43561-Q07889;O43561-Q13233;O95644-P16298;O95644-P48454;O95644-Q08209;O95644-Q12968;O95644-Q13469;P01100-O95644;P01100-P01112;P01100-P05771;P01100-P17252;P01100-P19838;P01100-P27361;P01100-P29353;P01100-P45983;P01100-Q04206;P01100-Q12968;P01100-Q13469;P01112-O43561;P01112-…
T Cell Receptor and CD3 Complex	P04234;P07766;P09693;P20963	P04234-P09693;P07766-P04234;P09693-P07766;P20963-P04234;P20963-P07766;P20963-P09693
T Cytotoxic Cell Surface Molecules	P01732;P04216;P04234;P05107;P05362;P07766;P08575;P09693;P10747;P20701;P20963	P01732-P04234;P04234-P08575;P04234-P09693;P05107-P04216;P05107-P05362;P05107-P20701;P07766-P01732;P07766-P04234;P07766-P08575;P09693-P01732;P09693-P07766;P09693-P08575;P10747-P01732;P10747-P04234;P10747-P07766;P10747-P09693;P20701-P05362;P20963-P01732;P20963-P04234;P20963-P07766;P20963-P08575;P20963-P09693;P20963-P10747
T Helper Cell Surface Molecules	P01730;P04216;P04234;P05107;P05362;P07766;P08575;P09693;P10747;P20701;P20963	P01730-P08575;P04234-P01730;P04234-P08575;P04234-P09693;P05107-P04216;P05107-P05362;P05107-P20701;P07766-P01730;P07766-P04234;P07766-P08575;P09693-P01730;P09693-P07766;P09693-P08575;P10747-P01730;P10747-P04234;P10747-P07766;P10747-P09693;P20701-P05362;P20963-P01730;P20963-P04234;P20963-P07766;P20963-P08575;P20963-P09693;P20963-P10747
TACI and BCMA stimulation of B cell immune responses	O00463;O14836;O15111;O75888;P19838;P45983;Q02223;Q04206;Q12933;Q13114;Q16539;Q96RJ3;Q99558;Q9Y275;Q9Y4K3	O00463-Q12933;O00463-Q9Y4K3;O14836-O00463;O14836-O75888;O14836-Q12933;O14836-Q9Y275;O14836-Q9Y4K3;O15111-P45983;O15111-Q04206;O15111-Q9Y4K3;O75888-O00463;O75888-Q13114;O75888-Q9Y275;O75888-Q9Y4K3;P19838-O00463;P19838-O15111;P19838-Q04206;P19838-Q12933;P19838-Q13114;P19838-Q9Y4K3;P45983-O00463;P45983-P19838;P45983-Q04206;P45983-Q12933;P45983-Q13114;P45983-Q9Y4K3;Q02223-O75888;Q02223-Q9Y4K3;Q04206-…
TGF beta signaling pathway	O15105;O43318;O95405;P01137;P10600;P12757;P12830;P27361;P36897;P37173;P61812;P84022;Q02750;Q09472;Q13485;Q15750;Q15796;Q92793	O15105-O43318;O15105-O95405;O15105-P01137;O15105-P10600;O15105-P36897;O15105-P37173;O15105-Q09472;O15105-Q15750;O43318-P27361;O43318-P37173;O95405-P84022;O95405-Q15796;P01137-O95405;P10600-P36897;P10600-P37173;P12757-O43318;P12830-P12757;P12830-P84022;P12830-Q13485;P27361-P01137;P27361-P84022;P27361-Q02750;P27361-Q13485;P27361-Q15750;P27361-Q15796;P36897-O43318;P36897-O95405;P36897-P01137;P36897-…
TNF/Stress Related Signaling	O14920;O15111;P01374;P01375;P05412;P18846;P19438;P19838;P25963;P42575;P45983;P45985;P46734;P52564;P78560;Q04206;Q12851;Q12933;Q13233;Q13546;Q15628;Q16539;Q92844;Q99558;Q9Y6K9	O14920-P19838;O14920-P25963;O14920-Q04206;O14920-Q12933;O14920-Q13546;O14920-Q15628;O14920-Q92844;O15111-O14920;O15111-P01375;O15111-P19438;O15111-P45983;O15111-P45985;O15111-Q04206;O15111-Q13546;O15111-Q15628;O15111-Q92844;P01374-P19838;P01374-P45983;P01374-Q13233;P01374-Q92844;P01375-O14920;P01375-P19438;P01375-Q13546;P01375-Q15628;P01375-Q9Y6K9;P05412-P01375;P05412-P19438;P05412-P19838;P05412-…
TNFR1 Signaling Pathway	O00273;O43318;O76075;O95429;P01375;P02545;P05412;P06400;P09874;P19438;P20700;P42574;P42575;P45983;P45985;P52566;P78527;P78560;Q03252;Q12933;Q13153;Q13158;Q13177;Q13233;Q13546;Q13813;Q14790;Q15628;Q8WXG6	O43318-P01375;O43318-P45983;O43318-P45985;O43318-Q15628;O76075-O00273;O95429-P01375;O95429-P19438;O95429-P42575;O95429-P45983;O95429-P78560;O95429-Q12933;O95429-Q13158;O95429-Q13546;O95429-Q15628;O95429-Q8WXG6;P01375-P19438;P01375-Q13546;P01375-Q15628;P02545-Q03252;P05412-P01375;P05412-P19438;P06400-P02545;P06400-P05412;P19438-O43318;P20700-P02545;P20700-P06400;P42574-O00273;P42574-O76075;P42574-…
TNFR2 Signaling Pathway	O14920;O15111;O95163;P01374;P19838;P20333;P21580;P25963;Q04206;Q12933;Q13077;Q13114;Q13233;Q13546;Q92844;Q99558;Q9Y6K9	O14920-P19838;O14920-P21580;O14920-P25963;O14920-Q04206;O14920-Q12933;O14920-Q13077;O14920-Q13546;O14920-Q92844;O15111-O14920;O15111-P21580;O15111-Q04206;O15111-Q13546;O15111-Q92844;O95163-O14920;O95163-O15111;P01374-P19838;P01374-Q13077;P01374-Q13114;P01374-Q13233;P01374-Q92844;P19838-O15111;P19838-P21580;P19838-P25963;P19838-Q04206;P19838-Q12933;P19838-Q13077;P19838-Q13114;P19838-Q13546;P19838-…
TPO Signaling Pathway	O60674;P01100;P01112;P04049;P05412;P05771;P17252;P19174;P20936;P27361;P27986;P29353;P40225;P40238;P40763;P42224;P42229;P42336;P48736;P51692;P62993;P68400;Q02750;Q07889	O60674-P04049;O60674-P27361;O60674-P40238;O60674-P40763;O60674-P42224;O60674-P42229;O60674-P42336;O60674-P48736;O60674-P51692;O60674-P62993;O60674-Q07889;P01100-P01112;P01100-P05771;P01100-P17252;P01100-P27361;P01100-P29353;P01100-P40763;P01100-P42224;P01100-P42229;P01100-P51692;P01100-P68400;P01112-O60674;P01112-P04049;P01112-P05412;P01112-P05771;P01112-P17252;P01112-P19174;P01112-P20936;P01112-…
TSP-1 Induced Apoptosis in Microvascular Endothelial Cell	P01100;P05412;P06241;P07996;P16671;P42574;Q16539	P01100-P07996;P01100-Q16539;P05412-P01100;P05412-Q16539;P06241-Q16539;P16671-P06241;P16671-P07996;P42574-Q16539
Telomeres, Telomerase, Cellular Aging, and Immortality	O14746;O95271;P00533;P01106;P01116;P04637;P06400;P07900;P08069;P10415;P12956;P13010;P17252;P24928;P31749;P54274;P67775;Q99973	O14746-P04637;O14746-P07900;O14746-P12956;O14746-P13010;O95271-P54274;P00533-P01116;P00533-P04637;P00533-P07900;P00533-P08069;P00533-P67775;P01106-P04637;P01106-P07900;P01106-P12956;P01106-P24928;P01106-P67775;P01116-P10415;P01116-P17252;P01116-P67775;P04637-P07900;P04637-P10415;P04637-P12956;P04637-P13010;P06400-P04637;P06400-P10415;P07900-P01116;P07900-P17252;P08069-P01116;P10415-P01106;P10415-…
Th1/Th2 Differentiation	P01579;P01589;P01903;P01911;P01912;P05112;P10747;P15260;P24394;P25942;P29459;P29460;P29965;P38484;P42081;P42701;P60568;Q13478;Q14116;Q29974;Q99665	P01579-P15260;P01579-P29459;P01579-P29460;P01579-P38484;P01579-P42701;P01579-Q99665;P01589-P05112;P01903-P01911;P01903-P01912;P01903-P29459;P01903-P29460;P01903-P42701;P01903-Q29974;P01903-Q99665;P01911-P29459;P01911-P29460;P01911-P42701;P01911-Q99665;P01912-P29459;P01912-P29460;P01912-P42701;P01912-Q99665;P10747-P01903;P10747-P01911;P10747-P01912;P10747-P42081;P10747-Q29974;P15260-P38484;P24394-…
The 4-1BB-dependent immune response	O14920;O15111;P01579;P05112;P05412;P15336;P19838;P25963;P45983;P60568;Q04206;Q07011;Q12933;Q13233;Q16539;Q99683;Q9Y4K4	O14920-P19838;O14920-P25963;O14920-Q04206;O14920-Q12933;O15111-O14920;O15111-P45983;O15111-Q04206;P01579-P05412;P01579-P19838;P01579-Q04206;P01579-Q13233;P05112-P19838;P05112-Q04206;P05112-Q16539;P05412-P05112;P05412-P15336;P05412-P19838;P05412-P25963;P05412-P60568;P05412-Q04206;P05412-Q16539;P15336-P01579;P19838-O15111;P19838-P15336;P19838-P25963;P19838-Q04206;P19838-Q12933;P25963-O15111;P25963-…
The Co-Stimulatory Signal During T-cell Activation	O75144;P01903;P01911;P01912;P04234;P06239;P07766;P09693;P10747;P16410;P20963;P27986;P33681;P42081;P42336;P60568;P62993;Q06124;Q08881;Q29974;Q9Y6W8	P01903-P01911;P01903-P01912;P01903-P06239;P01903-Q06124;P01903-Q08881;P01903-Q29974;P01911-P06239;P01911-Q06124;P01911-Q08881;P01912-P06239;P01912-Q06124;P01912-Q08881;P04234-P01903;P04234-P01911;P04234-P01912;P04234-P06239;P04234-P09693;P04234-P27986;P04234-P33681;P04234-P42081;P04234-P42336;P04234-P60568;P04234-Q06124;P04234-Q08881;P04234-Q29974;P06239-P07766;P06239-P16410;P06239-P20963;P06239-…
The IGF-1 Receptor and Longevity	O43524;P00441;P01112;P01241;P04040;P04179;P05019;P08069;P10912;P27986;P29353;P31749;P42336;P48736	O43524-P29353;P01112-P05019;P01112-P08069;P01112-P27986;P01112-P29353;P01112-P42336;P01241-P05019;P01241-P10912;P04040-P00441;P04040-P04179;P05019-P08069;P05019-P27986;P05019-P29353;P05019-P42336;P05019-P48736;P08069-P10912;P08069-P29353;P08069-P42336;P08069-P48736;P10912-P27986;P10912-P29353;P27986-P08069;P27986-P42336;P29353-P27986;P31749-O43524;P31749-P00441;P31749-P04040;P31749-P04179;P31749-…
The Role of Eosinophils in the Chemokine Network of Allergy	P01903;P01911;P01912;P04141;P05113;P08700;P13501;P51671;P51677;Q29974	P01903-P01911;P01903-P01912;P01903-Q29974;P04141-P05113;P04141-P08700;P08700-P05113;P51677-P13501;P51677-P51671
The information-processing pathway at the IFN-beta enhancer	P05412;P09429;P15336;P19838;P24928;Q04206;Q92793;Q92831	P05412-P15336;P05412-P19838;P05412-P24928;P05412-Q04206;P05412-Q92831;P15336-P24928;P15336-Q92831;P19838-P09429;P19838-P15336;P19838-Q04206;P24928-Q92793;Q04206-P09429;Q04206-P15336;Q92793-P05412;Q92793-P15336;Q92793-P19838;Q92793-Q04206;Q92831-P24928;Q92831-Q92793
The role of FYVE-finger proteins in vesicle transport	O14964;P00533;P01133;P02786;P02787;P20339;Q15075	P00533-O14964;P00533-P01133;P00533-P20339;P01133-O14964;P01133-P20339;P02786-P02787;Q15075-P20339
Thrombin signaling and protease-activated receptors	O15013;O15085;O43307;O60237;O94989;P00734;P05771;P17252;P25116;P27986;P42336;P48736;P50148;P61586;P62873;P63096;Q03113;Q08828;Q12774;Q13464;Q14155;Q14289;Q14344;Q15052;Q5VV41;Q6ZSZ5;Q92888;Q92974;Q96PE2;Q96RI0;Q9NQ66;Q9NR80;Q9NZN5	O15013-P61586;O15085-P61586;O15085-Q03113;O15085-Q14344;O43307-P61586;O60237-Q13464;O94989-P61586;P00734-P25116;P00734-P50148;P00734-P62873;P00734-P63096;P00734-Q96RI0;P00734-Q9NQ66;P05771-P61586;P05771-Q14289;P17252-P61586;P17252-Q14289;P25116-P48736;P25116-P50148;P25116-P62873;P25116-P63096;P25116-Q96RI0;P25116-Q9NQ66;P27986-P42336;P27986-P61586;P27986-Q14289;P27986-Q9NQ66;P42336-P05771;P42336-…
Toll-Like Receptor Pathway	O00206;O14920;O15111;O15455;O43318;O60603;P01100;P05412;P08571;P19419;P19525;P19838;P25963;P45983;P45985;P46734;P51617;P52564;P58753;Q04206;Q07869;Q13233;Q15750;Q16539;Q99558;Q99836;Q9BQ95;Q9BXR5;Q9H0E2;Q9NR96;Q9NYJ8;Q9Y2C9;Q9Y4K3;Q9Y6K9;Q9Y6Y9	O00206-Q99836;O00206-Q9Y4K3;O14920-O00206;O14920-O15455;O14920-O60603;O14920-P19525;O14920-P19838;O14920-P25963;O14920-P58753;O14920-Q04206;O14920-Q15750;O14920-Q99836;O14920-Q9NYJ8;O14920-Q9Y2C9;O14920-Q9Y4K3;O14920-Q9Y6Y9;O15111-O00206;O15111-O14920;O15111-O15455;O15111-O60603;O15111-P19525;O15111-P45983;O15111-P45985;O15111-P58753;O15111-Q04206;O15111-Q15750;O15111-Q99836;O15111-Q9NYJ8;O15111-…
Transcription Regulation by Methyltransferase of CARM1	P10276;P10644;P13861;P16220;P19793;P22612;P22694;P31321;P31323;Q09472;Q86X55;Q92793;Q9Y6Q9	P10276-P19793;P10276-Q09472;P10644-P13861;P10644-P22694;P10644-P31321;P10644-P31323;P13861-P31323;P16220-P22612;P16220-P22694;P16220-Q09472;P22612-P10644;P22694-P13861;P22694-P31323;Q09472-P19793;Q09472-P22612;Q09472-P22694;Q09472-P31323;Q09472-Q92793;Q09472-Q9Y6Q9;Q86X55-P10276;Q86X55-P19793;Q86X55-Q09472;Q86X55-Q92793;Q92793-P10276;Q92793-P16220;Q92793-P19793;Q92793-P22612;Q92793-P22694;Q9Y6Q9-…
Transcription factor CREB and its extracellular signals	O75582;P01112;P05771;P10644;P13861;P16220;P17252;P22612;P22694;P27361;P27986;P28482;P31321;P31323;P31749;P42336;P62993;P63000;P63092;P84996;Q07889;Q08828;Q13554;Q13555;Q13557;Q15418;Q16539;Q5JWF2;Q9UQM7	O75582-P16220;P01112-P05771;P01112-P17252;P01112-P27361;P01112-P27986;P01112-P28482;P01112-P42336;P01112-P63000;P01112-Q07889;P01112-Q15418;P01112-Q16539;P05771-Q07889;P10644-P13861;P10644-P22694;P10644-P31321;P10644-P31323;P10644-P62993;P13861-P31323;P16220-P05771;P16220-P17252;P16220-P22612;P16220-P22694;P16220-P27361;P16220-P28482;P16220-P62993;P16220-Q07889;P17252-P63000;P17252-Q07889;P22612-…
Trefoil Factors Initiate Mucosal Healing	O14727;P00533;P01112;P01241;P05556;P10912;P27361;P27986;P28482;P29353;P31749;P35222;P42336;P48736;P55211;P61586;P62993;P99999;Q05397;Q07889;Q92934	O14727-P99999;P00533-P01112;P00533-P05556;P00533-P27361;P00533-P28482;P00533-P35222;P00533-P42336;P00533-P48736;P00533-P62993;P01112-P27361;P01112-P27986;P01112-P28482;P01112-P29353;P01112-P42336;P01112-P61586;P01112-Q05397;P01112-Q07889;P01241-P10912;P01241-P27361;P01241-P28482;P05556-P29353;P05556-P31749;P05556-P61586;P05556-Q05397;P10912-P27361;P10912-P27986;P10912-P28482;P10912-P29353;P10912-…
Trka Receptor Signaling Pathway	P01112;P01138;P04629;P05771;P17252;P19174;P27986;P29353;P31749;P42336;P62993;Q07889	P01112-P04629;P01112-P05771;P01112-P17252;P01112-P19174;P01112-P27986;P01112-P29353;P01112-P42336;P01112-Q07889;P01138-P04629;P01138-P19174;P01138-P27986;P01138-P29353;P01138-P42336;P04629-P19174;P04629-P27986;P04629-P29353;P04629-P42336;P04629-P62993;P05771-P29353;P05771-Q07889;P17252-P29353;P17252-Q07889;P19174-P05771;P19174-P17252;P19174-P29353;P19174-P62993;P27986-P19174;P27986-P42336;P27986-…
Tumor Suppressor Arf Inhibits Ribosomal Biogenesis	O15160;O95602;P00519;P01106;P04637;P06400;P27986;P42336;P42771;P48736;P63000;Q00987;Q01094;Q13207;Q15672;Q8N726;Q9H9Y6;Q9Y2S0	O95602-O15160;O95602-Q9H9Y6;O95602-Q9Y2S0;P00519-P01106;P00519-P06400;P00519-P27986;P00519-P63000;P00519-Q00987;P00519-Q01094;P00519-Q15672;P01106-O15160;P01106-P04637;P01106-Q13207;P01106-Q15672;P04637-P00519;P04637-Q00987;P04637-Q15672;P06400-P04637;P06400-Q00987;P06400-Q01094;P27986-P42336;P27986-P63000;P42336-P63000;P42771-P01106;P42771-P04637;P42771-P06400;P42771-Q00987;P48736-P63000;Q00987-…
VEGF, Hypoxia, and Angiogenesis	P01112;P05198;P05771;P15692;P17252;P17948;P19174;P20042;P27540;P27986;P29353;P29474;P35916;P35968;P40337;P41091;P41567;P42336;P47813;P48736;P49023;P49770;Q05397;Q13144;Q14232;Q15717;Q16665;Q9NR50;Q9UI10	P01112-P05771;P01112-P17252;P01112-P19174;P01112-P27986;P01112-P29353;P01112-P42336;P01112-Q05397;P05198-P41091;P05771-P29353;P05771-P49023;P05771-Q05397;P15692-P17948;P15692-P35968;P17252-P29353;P17252-P49023;P17252-Q05397;P17948-P19174;P17948-P27986;P17948-P29353;P17948-P42336;P17948-P48736;P17948-Q05397;P17948-Q16665;P19174-P05771;P19174-P15692;P19174-P17252;P19174-P29353;P19174-P35968;P20042-…
Visceral Fat Deposits and the Metabolic Syndrome	P01375;P04150;P06858;P19793;P37231;Q15848	P04150-P19793;P06858-P19793;P06858-P37231;P19793-P01375;P37231-P01375;P37231-P04150;P37231-P19793;Q15848-P19793;Q15848-P37231
Vitamin C in the Brain	P02462;P07237;P08572;P29400;P53420;Q01955	P02462-P07237;P02462-P08572;P02462-P29400;P02462-P53420;P08572-P07237;P08572-P29400;P08572-P53420;P29400-P07237;P53420-P07237;P53420-P29400;Q01955-P07237;Q01955-P29400;Q01955-P53420
WNT Signaling Pathway	O14640;O15169;O43318;P01106;P04628;P24385;P25054;P35222;P48729;P48730;P49841;P67775;P68400;Q03181;Q04724;Q13363;Q13485;Q13547;Q15750;Q92793;Q92837;Q9UBE8;Q9UJU2;Q9UP38;Q9Y297;Q9Y5W5	O14640-O15169;O14640-P04628;O14640-P25054;O14640-P35222;O14640-P48730;O14640-P49841;O14640-P68400;O14640-Q13485;O14640-Q9UP38;O15169-P01106;O15169-P25054;O15169-P35222;O15169-P48730;O15169-P49841;O15169-P67775;O15169-P68400;O15169-Q92837;O15169-Q9UJU2;O43318-P04628;P01106-P49841;P01106-P67775;P01106-Q13485;P01106-Q13547;P01106-Q92793;P24385-P01106;P24385-P35222;P24385-P49841;P24385-Q92793;P24385-…
Y branching of actin filaments	O00401;O00625;O15143;O15144;O15145;O15511;P16333;P59998;P61158;P61160;P63000;P68133;Q92558;Q92747;Q9NYB9;Q9UPY6;Q9Y2A7;Q9Y6W5	O00401-O15143;O00401-P16333;O00401-P61160;O00625-P63000;O00625-Q9Y6W5;O15143-O15144;O15143-O15145;O15143-O15511;O15143-P16333;O15143-P59998;O15143-P61160;O15143-Q92558;O15143-Q9UPY6;O15143-Q9Y2A7;O15143-Q9Y6W5;O15144-O00401;O15144-O15145;O15144-O15511;O15144-P16333;O15144-P59998;O15144-P61160;O15144-P63000;O15144-Q92558;O15144-Q92747;O15144-Q9UPY6;O15144-Q9Y2A7;O15144-Q9Y6W5;O15145-O00401;O15145-…
b-arrestins in GPCR Desensitization	O95782;P49407;P62873;P63092;P84996;Q05193;Q08828;Q5JWF2;Q96CW1;Q9NQ66	O95782-Q05193;P49407-Q05193;P62873-Q9NQ66;P63092-P62873;P84996-P62873;Q08828-P62873;Q08828-P63092;Q08828-P84996;Q08828-Q5JWF2;Q5JWF2-P62873;Q96CW1-O95782;Q96CW1-Q05193
cdc25 and chk1 Regulatory Pathway in response to DNA damage	O14757;P06493;P30291;P30304;P30305;P30307;Q01538;Q04917;Q13315	O14757-P30291;O14757-P30304;O14757-P30305;O14757-P30307;P06493-P30291;P06493-Q01538;P30304-P06493;P30305-P06493;P30305-Q04917;P30307-P06493;P30307-Q04917;Q13315-O14757
fMLP induced chemokine gene expression in HMC-1 cells	O75747;O95644;P01112;P04049;P16298;P19419;P19838;P19878;P21462;P25963;P27361;P28482;P30679;P36507;P46734;P48454;P52564;P62158;P62873;P63000;Q02750;Q04206;Q08209;Q12968;Q13153;Q13233;Q13469;Q14012;Q14934;Q16539;Q9NQ66	O75747-P63000;O75747-Q9NQ66;O95644-P16298;O95644-P48454;O95644-Q08209;O95644-Q12968;O95644-Q13469;P01112-P04049;P01112-P27361;P01112-P28482;P01112-P36507;P01112-P63000;P01112-Q02750;P01112-Q13233;P01112-Q16539;P04049-P36507;P04049-Q02750;P04049-Q04206;P04049-Q13233;P19419-P19838;P19419-P28482;P19419-Q16539;P19838-P04049;P19838-P25963;P19838-P63000;P19838-Q04206;P19878-P19838;P19878-Q13153;P21462-…
g-Secretase mediated ErbB4 Signaling Pathway	O14511;P05771;P17252;P49768;P56975;P78536;Q15303	O14511-P05771;O14511-P17252;O14511-P49768;O14511-P56975;O14511-Q15303;P56975-P05771;P56975-P17252;P56975-P49768;P78536-O14511;P78536-P05771;P78536-P17252;P78536-P49768;P78536-P56975;P78536-Q15303;Q15303-P05771;Q15303-P17252;Q15303-P49768;Q15303-P56975
mCalpain and friends in Cell motility	P00533;P01112;P01133;P04632;P05556;P07384;P10644;P10916;P13861;P15311;P17655;P22612;P22694;P27361;P28482;P31321;P31323;P49023;P56199;P68133;Q05397;Q15746;Q9Y490	P00533-P01112;P00533-P01133;P00533-P05556;P00533-P27361;P00533-P28482;P00533-P49023;P00533-P56199;P01112-P27361;P01112-P28482;P01112-Q05397;P01133-P01112;P01133-P05556;P01133-P27361;P01133-P28482;P01133-P49023;P01133-P56199;P01133-Q05397;P05556-P10644;P05556-P13861;P05556-P22612;P05556-P22694;P05556-P31321;P05556-P31323;P05556-Q05397;P05556-Q15746;P07384-P04632;P10644-P00533;P10644-P13861;P10644-…
mTOR Signaling Pathway	O15530;O43432;P06730;P23443;P23588;P27986;P31749;P42336;P42345;P49815;P60484;P60842;P62753;P62942;P67775;P78344;Q04637;Q13541;Q14152;Q14240;Q92574;Q9BUB5	O15530-P23443;O15530-P27986;O15530-P31749;O15530-P42336;O15530-P60484;O15530-P67775;O43432-P60842;P06730-O43432;P06730-P23443;P06730-P42345;P06730-P62753;P23443-P31749;P23443-P42345;P23443-P62753;P23588-P06730;P23588-P23443;P23588-P62753;P23588-Q04637;P23588-Q14152;P27986-P23443;P27986-P42336;P27986-P60484;P31749-P27986;P31749-P42336;P31749-P49815;P31749-P60484;P31749-Q13541;P31749-Q9BUB5;P42336-…
p38 MAPK Signaling Pathway	O43318;O75582;P01106;P01112;P01137;P04792;P05114;P10600;P15336;P16220;P19419;P29353;P35638;P36897;P42224;P45985;P47712;P49137;P52564;P60953;P61244;P61812;P62993;P63000;P80192;Q02078;Q02080;Q06413;Q12933;Q13233;Q13546;Q14814;Q15628;Q16082;Q16539;Q8IW41;Q99683;Q9BUB5;Q9UER7;Q9Y4G8	O43318-P45985;O43318-P52564;O43318-P63000;O43318-Q15628;O43318-Q16539;O43318-Q99683;O75582-P16220;P01106-P04792;P01106-P16220;P01106-P42224;P01106-P61244;P01112-O43318;P01112-P29353;P01112-P63000;P01112-Q13233;P01112-Q16539;P01112-Q9Y4G8;P04792-Q16539;P04792-Q9UER7;P05114-O75582;P10600-P36897;P15336-O75582;P15336-P16220;P15336-P61812;P15336-Q02080;P15336-Q06413;P15336-Q14814;P16220-P01137;P16220-…
p53 Signaling Pathway	O14727;P04637;P06400;P10415;P11802;P12004;P24385;P24522;P24864;P24941;P38936;Q00987;Q01094;Q07812;Q13315	O14727-P10415;O14727-Q07812;P04637-P10415;P04637-P38936;P04637-Q00987;P06400-P04637;P06400-P10415;P06400-P24385;P06400-Q00987;P06400-Q01094;P11802-P06400;P11802-P12004;P11802-P38936;P11802-Q01094;P12004-P04637;P12004-P06400;P12004-P24385;P12004-P24522;P12004-P24941;P12004-P38936;P12004-Q00987;P24385-P04637;P24385-P11802;P24385-P24522;P24385-P24941;P24385-P38936;P24385-Q01094;P24522-P04637;P24522-…
uCalpain and friends in Cell spread	P04632;P05106;P05556;P07384;P12814;P12931;P15311;P35609;P49023;P56199;P61586;P63000;P68133;Q05397;Q08043;Q13813;Q9Y490	P05106-P12931;P05106-P61586;P05556-P12814;P05556-P12931;P05556-P61586;P05556-P63000;P05556-Q05397;P05556-Q13813;P07384-P04632;P07384-P05106;P12814-P05106;P12814-P12931;P12814-P49023;P12814-P56199;P12814-Q05397;P12814-Q9Y490;P12931-Q05397;P12931-Q9Y490;P15311-P61586;P35609-P05106;P35609-P05556;P35609-P49023;P35609-P56199;P35609-Q05397;P35609-Q9Y490;P49023-P05106;P49023-P05556;P49023-P12931;P49023-…
