# Supplementary material for: Computational analysis of multimorbidity between asthma, eczema and rhinitis
Source: PLoS One. 2017 Jun 9;12(6):e0179125. doi: 10.1371/journal.pone.0179125 (PMC5466323; doi:10.1371/journal.pone.0179125)
Supplement: S5 Table — Columns are as follows: Query: PubMed query used; Rank: position (rank) of the gene (ordered by ascending FDR); GeneID: gene name; n: number of PubMed abstracts manually associated to the gene; n_pos: number of PubMed abstracts that Génie has selected at P < 0.01; FDR: False Discovery Rate; Top 10 PMIDs: top 10 PMIDs for each gene, together with the associated p-value. More information at http://cbdm-01.zdv.uni-mainz.de/~jfontain/cms/. (XLS) [file pone.0179125.s016.xls]

## Sheet: Sheet1
PubMed query used	position (rank) of the gene (ordered by ascending FDR);	gene in Entrez ID	Common gene name		Number of PubMed abstracts manually associated to the gene	Number of PubMed abstracts that Génie has selected at P < 0.01	False Discovery Rate	Top 10 PMIDs: top 10 PMIDs for each gene, together with the associated p-value
Query	Rank	GeneID	Symbol	Homologs	n	n_pos	FDR	Top 10 pmids
comorbidity AND asthma AND (eczema OR "atopic dermatitis")	1	2312	FLG	-	211	85	1.024e-141	19589816 (p=1.05e-04), 23078034 (p=1.11e-04), 25174864 (p=3.02e-04), 18313126 (p=3.05e-04), 21365004 (p=4.00e-04), 19348926 (p=4.02e-04), 18396323 (p=4.03e-04), 22030464 (p=4.04e-04), 25277085 (p=4.05e-04), 25528737 (p=4.08e-04),
comorbidity AND asthma AND (eczema OR "atopic dermatitis")	2	3596	IL13	-	505	65	2.456e-78	22846750 (p=1.07e-04), 22023794 (p=4.03e-04), 22013915 (p=4.08e-04), 20975284 (p=4.09e-04), 18417506 (p=4.10e-04), 20085599 (p=4.11e-04), 15007355 (p=4.14e-04), 19254294 (p=4.16e-04), 24447084 (p=4.20e-04), 16272823 (p=4.21e-04),
comorbidity AND asthma AND (eczema OR "atopic dermatitis")	3	929	CD14	-	601	52	3.442e-57	17877764 (p=4.06e-04), 18417506 (p=4.10e-04), 20085599 (p=4.11e-04), 20109750 (p=4.12e-04), 12580907 (p=4.15e-04), 16446545 (p=4.15e-04), 23194293 (p=4.15e-04), 11282774 (p=4.16e-04), 17919709 (p=4.16e-04), 14617510 (p=4.17e-04),
comorbidity AND asthma AND (eczema OR "atopic dermatitis")	4	3566	IL4R	-	386	38	3.587e-47	20002627 (p=4.03e-04), 15737301 (p=4.08e-04), 23480403 (p=4.09e-04), 20085599 (p=4.11e-04), 12100043 (p=4.19e-04), 16313681 (p=4.21e-04), 17121586 (p=6.00e-04), 11709756 (p=6.03e-04), 17209513 (p=6.03e-04), 12422339 (p=6.05e-04),
comorbidity AND asthma AND (eczema OR "atopic dermatitis")	5	154	ADRB2	-	885	45	1.904e-41	18709160 (p=4.06e-04), 20210814 (p=4.14e-04), 16935688 (p=4.20e-04), 15170877 (p=6.04e-04), 12422339 (p=6.05e-04), 15248848 (p=1.00e-03), 18558635 (p=1.10e-03), 25162199 (p=1.10e-03), 17883727 (p=1.40e-03), 24691493 (p=1.50e-03),
comorbidity AND asthma AND (eczema OR "atopic dermatitis")	6	3565	IL4	-	948	46	2.567e-41	19254294 (p=4.16e-04), 15087090 (p=4.16e-04), 22884982 (p=4.17e-04), 11167377 (p=4.18e-04), 19552791 (p=4.18e-04), 24447084 (p=4.20e-04), 16313681 (p=4.21e-04), 17121586 (p=6.00e-04), 19735490 (p=6.01e-04), 18410779 (p=6.01e-04),
comorbidity AND asthma AND (eczema OR "atopic dermatitis")	7	80332	ADAM33	-	124	24	6.758e-40	15298558 (p=6.01e-04), 16784537 (p=6.02e-04), 22349453 (p=6.02e-04), 15986064 (p=1.70e-03), 24751681 (p=2.00e-03), 19996348 (p=2.10e-03), 21179102 (p=2.30e-03), 17703412 (p=2.50e-03), 18560587 (p=2.90e-03), 15805180 (p=2.90e-03),
comorbidity AND asthma AND (eczema OR "atopic dermatitis")	8	2206	MS4A2	-	98	20	1.751e-34	20085599 (p=4.11e-04), 15087090 (p=4.16e-04), 17121586 (p=6.00e-04), 11702205 (p=6.03e-04), 17430357 (p=6.05e-04), 12422339 (p=6.05e-04), 8805698 (p=7.01e-04), 11245344 (p=7.02e-04), 12047428 (p=9.02e-04), 20028371 (p=2.00e-03),
comorbidity AND asthma AND (eczema OR "atopic dermatitis")	9	2950	GSTP1	-	1300	42	4.42e-32	18709160 (p=4.06e-04), 20210814 (p=4.14e-04), 15544594 (p=4.19e-04), 22355322 (p=7.02e-04), 16162701 (p=1.00e-03), 20674822 (p=1.00e-03), 17711870 (p=1.10e-03), 20526719 (p=1.10e-03), 23330922 (p=1.40e-03), 23622008 (p=1.50e-03),
comorbidity AND asthma AND (eczema OR "atopic dermatitis")	10	387129	NPSR1	-	74	17	8.315e-31	15710598 (p=4.03e-04), 24439655 (p=4.11e-04), 18340359 (p=7.02e-04), 23372674 (p=9.00e-04), 25091462 (p=9.02e-04), 18305139 (p=9.02e-04), 18285428 (p=2.00e-03), 19996348 (p=2.10e-03), 17703412 (p=2.50e-03), 19624525 (p=3.00e-03),
comorbidity AND asthma AND (eczema OR "atopic dermatitis")	11	94103	ORMDL3	-	64	16	7.86e-30	19133921 (p=4.20e-04), 24649901 (p=1.70e-03), 22017802 (p=1.70e-03), 19175592 (p=2.00e-03), 20503266 (p=2.10e-03), 20372189 (p=2.10e-03), 20860503 (p=2.90e-03), 23096927 (p=3.50e-03), 21843571 (p=3.90e-03), 17611496 (p=4.80e-03),
comorbidity AND asthma AND (eczema OR "atopic dermatitis")	12	2944	GSTM1	-	1869	46	1.427e-29	19860819 (p=6.05e-04), 22484660 (p=8.01e-04), 16162701 (p=1.00e-03), 20674822 (p=1.00e-03), 21176116 (p=1.10e-03), 17711870 (p=1.10e-03), 20526719 (p=1.10e-03), 21051083 (p=1.60e-03), 25328891 (p=1.70e-03), 24559168 (p=1.90e-03),
comorbidity AND asthma AND (eczema OR "atopic dermatitis")	13	85480	TSLP	-	178	17	5.199e-24	24397611 (p=4.21e-04), 23267211 (p=6.01e-04), 24525665 (p=6.02e-04), 18244952 (p=6.03e-04), 22036096 (p=6.05e-04), 24401911 (p=8.01e-04), 22973903 (p=1.10e-03), 21689850 (p=1.10e-03), 21820713 (p=1.70e-03), 20444170 (p=1.70e-03),
comorbidity AND asthma AND (eczema OR "atopic dermatitis")	14	79068	FTO	-	505	23	6.053e-24	21182554 (p=7.03e-04), 21443588 (p=1.10e-03), 25110886 (p=1.40e-03), 24348519 (p=1.70e-03), 19255736 (p=1.70e-03), 24040077 (p=2.10e-03), 19153581 (p=2.90e-03), 20598163 (p=3.30e-03), 18598350 (p=3.50e-03), 20418190 (p=3.90e-03),
comorbidity AND asthma AND (eczema OR "atopic dermatitis")	15	11005	SPINK5	-	66	13	3.565e-23	20085599 (p=4.11e-04), 15005725 (p=4.12e-04), 14551605 (p=4.22e-04), 19534795 (p=9.02e-04), 15986064 (p=1.70e-03), 11544479 (p=1.70e-03), 17989887 (p=1.70e-03), 19996348 (p=2.10e-03), 20395963 (p=3.30e-03), 19247692 (p=5.40e-03),
comorbidity AND asthma AND (eczema OR "atopic dermatitis")	16	6778	STAT6	-	259	17	2.709e-21	17121586 (p=6.00e-04), 18846228 (p=1.10e-03), 23815671 (p=1.20e-03), 17883727 (p=1.40e-03), 22017802 (p=1.70e-03), 17703412 (p=2.50e-03), 22075330 (p=2.90e-03), 15342695 (p=3.30e-03), 20395963 (p=3.30e-03), 15637551 (p=3.50e-03),
comorbidity AND asthma AND (eczema OR "atopic dermatitis")	17	2952	GSTT1	-	1568	32	4.962e-21	22484660 (p=8.01e-04), 17711870 (p=1.10e-03), 21051083 (p=1.60e-03), 24559168 (p=1.90e-03), 16409207 (p=2.10e-03), 16030123 (p=3.00e-03), 15095308 (p=3.50e-03), 21109554 (p=4.60e-03), 18057098 (p=4.80e-03), 17937745 (p=4.80e-03),
comorbidity AND asthma AND (eczema OR "atopic dermatitis")	18	6532	SLC6A4	-	1797	34	5.335e-21	23947391 (p=7.02e-04), 20868372 (p=1.70e-03), 18188752 (p=2.10e-03), 23394411 (p=2.20e-03), 17387319 (p=2.90e-03), 19154632 (p=2.90e-03), 16679343 (p=3.20e-03), 20101393 (p=3.50e-03), 16497275 (p=3.50e-03), 16972224 (p=3.80e-03),
comorbidity AND asthma AND (eczema OR "atopic dermatitis")	19	7356	SCGB1A1	-	132	14	6.011e-21	19128353 (p=4.02e-04), 15744536 (p=4.11e-04), 24735334 (p=6.03e-04), 19222419 (p=1.10e-03), 20736038 (p=1.10e-03), 21255142 (p=1.10e-03), 17703412 (p=2.50e-03), 17716718 (p=2.90e-03), 20395963 (p=3.30e-03), 9643286 (p=3.50e-03),
comorbidity AND asthma AND (eczema OR "atopic dermatitis")	20	51131	PHF11	-	30	10	1.027e-20	20717939 (p=2.00e-04), 20085599 (p=4.11e-04), 19386584 (p=7.03e-04), 15674390 (p=2.10e-03), 19996348 (p=2.10e-03), 12754510 (p=2.10e-03), 17703412 (p=2.50e-03), 17702965 (p=3.90e-03), 19247692 (p=5.40e-03), 20701904 (p=7.30e-03),
comorbidity AND asthma AND (eczema OR "atopic dermatitis")	21	1815	DRD4	-	562	21	1.179e-20	14560322 (p=6.06e-04), 18188752 (p=2.10e-03), 15843770 (p=2.90e-03), 17406960 (p=3.50e-03), 24283216 (p=3.80e-03), 23127570 (p=4.80e-03), 24102377 (p=5.00e-03), 18563476 (p=5.50e-03), 22051710 (p=5.90e-03), 17157268 (p=6.00e-03),
comorbidity AND asthma AND (eczema OR "atopic dermatitis")	22	7099	TLR4	-	1682	32	2.603e-20	17877764 (p=4.06e-04), 18517079 (p=4.08e-04), 20085599 (p=4.11e-04), 15007351 (p=4.11e-04), 24524443 (p=4.12e-04), 20109750 (p=4.12e-04), 20685742 (p=4.19e-04), 14735148 (p=1.00e-03), 23821954 (p=1.00e-03), 20646366 (p=1.00e-03),
comorbidity AND asthma AND (eczema OR "atopic dermatitis")	23	3586	IL10	-	2305	36	1.818e-19	25562560 (p=3.00e-04), 24167151 (p=4.04e-04), 15007355 (p=4.14e-04), 18440625 (p=6.03e-04), 18534084 (p=1.00e-03), 20232770 (p=1.10e-03), 16759385 (p=1.20e-03), 15120189 (p=1.40e-03), 14748015 (p=1.70e-03), 18416756 (p=2.10e-03),
comorbidity AND asthma AND (eczema OR "atopic dermatitis")	24	348	APOE	-	3542	45	2.676e-19	21276236 (p=9.01e-04), 19054180 (p=2.00e-03), 15611352 (p=2.10e-03), 20697334 (p=2.20e-03), 18728174 (p=2.50e-03), 15526312 (p=3.20e-03), 18243212 (p=3.50e-03), 21790705 (p=3.90e-03), 18189240 (p=3.90e-03), 12880539 (p=4.10e-03),
comorbidity AND asthma AND (eczema OR "atopic dermatitis")	25	7124	TNF	-	4656	52	6.797e-19	18709160 (p=4.06e-04), 20085599 (p=4.11e-04), 20210814 (p=4.14e-04), 15137526 (p=4.14e-04), 17450233 (p=4.18e-04), 19196817 (p=6.00e-04), 18385169 (p=9.00e-04), 17686102 (p=9.00e-04), 20194818 (p=9.02e-04), 21271873 (p=9.02e-04),
comorbidity AND asthma AND (eczema OR "atopic dermatitis")	26	3119	HLA-DQB1	-	1322	24	3.289e-16	19052351 (p=4.15e-04), 17212706 (p=6.01e-04), 16802776 (p=6.04e-04), 17686102 (p=9.00e-04), 12890388 (p=9.02e-04), 15853903 (p=2.00e-03), 22281000 (p=2.90e-03), 15784113 (p=2.90e-03), 23443026 (p=3.50e-03), 20120618 (p=4.60e-03),
comorbidity AND asthma AND (eczema OR "atopic dermatitis")	27	7097	TLR2	-	1071	21	2.599e-15	17877764 (p=4.06e-04), 20085599 (p=4.11e-04), 15007351 (p=4.11e-04), 20685742 (p=4.19e-04), 21134221 (p=6.01e-04), 21281869 (p=6.05e-04), 23821954 (p=1.00e-03), 20646366 (p=1.00e-03), 19096003 (p=1.40e-03), 16551363 (p=2.20e-03),
comorbidity AND asthma AND (eczema OR "atopic dermatitis")	28	64127	NOD2	-	753	18	5.267e-15	12704363 (p=3.05e-04), 16008671 (p=6.02e-04), 17703412 (p=2.50e-03), 19826411 (p=4.80e-03), 20024904 (p=4.90e-03), 19479837 (p=5.10e-03), 19247692 (p=5.40e-03), 17156146 (p=5.50e-03), 15551253 (p=6.00e-03), 17301648 (p=6.00e-03),
comorbidity AND asthma AND (eczema OR "atopic dermatitis")	29	3123	HLA-DRB1	-	2354	29	1.406e-14	19052351 (p=4.15e-04), 17212706 (p=6.01e-04), 16802776 (p=6.04e-04), 11378822 (p=6.07e-04), 17686102 (p=9.00e-04), 11167958 (p=1.70e-03), 15853903 (p=2.00e-03), 12169181 (p=2.60e-03), 15784113 (p=2.90e-03), 20560812 (p=3.40e-03),
comorbidity AND asthma AND (eczema OR "atopic dermatitis")	30	3567	IL5	-	200	11	1.034e-13	24875149 (p=3.04e-04), 15007355 (p=4.14e-04), 17362254 (p=4.15e-04), 22186238 (p=1.00e-03), 18849614 (p=1.50e-03), 15805995 (p=1.90e-03), 17703412 (p=2.50e-03), 20636896 (p=4.10e-03), 18996999 (p=4.60e-03), 19247692 (p=5.40e-03),
comorbidity AND asthma AND (eczema OR "atopic dermatitis")	31	4210	MEFV	-	296	12	2.636e-13	17067442 (p=7.01e-04), 15643295 (p=1.70e-03), 17469185 (p=2.90e-03), 24862656 (p=2.90e-03), 19115056 (p=3.30e-03), 24071932 (p=4.80e-03), 18353061 (p=6.00e-03), 14727457 (p=6.00e-03), 23356447 (p=6.40e-03), 23592051 (p=6.60e-03),
comorbidity AND asthma AND (eczema OR "atopic dermatitis")	32	2205	FCER1A	-	111	9	6.984e-13	22222815 (p=6.01e-04), 17430357 (p=6.05e-04), 18846228 (p=1.10e-03), 20028371 (p=2.00e-03), 12897750 (p=2.00e-03), 21209833 (p=2.20e-03), 17703412 (p=2.50e-03), 23725541 (p=2.90e-03), 22075330 (p=2.90e-03),
comorbidity AND asthma AND (eczema OR "atopic dermatitis")	33	4524	MTHFR	-	2871	29	1.049e-12	18070159 (p=1.04e-04), 20456312 (p=4.06e-04), 20298385 (p=4.16e-04), 23692062 (p=6.06e-04), 14727014 (p=2.10e-03), 11925474 (p=2.60e-03), 20213658 (p=3.20e-03), 19466593 (p=3.50e-03), 25598270 (p=3.60e-03), 21731042 (p=4.80e-03),
comorbidity AND asthma AND (eczema OR "atopic dermatitis")	34	1401	CRP	-	1534	21	1.499e-12	21801245 (p=4.08e-04), 22554299 (p=6.01e-04), 18219765 (p=9.02e-04), 23684514 (p=1.70e-03), 24558995 (p=2.80e-03), 18704199 (p=2.90e-03), 20219150 (p=3.50e-03), 19010993 (p=4.50e-03), 22556030 (p=5.30e-03), 17395501 (p=5.70e-03),
comorbidity AND asthma AND (eczema OR "atopic dermatitis")	35	55876	GSDMB	-	40	7	1.66e-12	19029000 (p=3.03e-04), 19133921 (p=4.20e-04), 24066901 (p=7.02e-04), 20860503 (p=2.90e-03), 17611496 (p=4.80e-03), 22732088 (p=4.80e-03), 23817569 (p=8.00e-03),
comorbidity AND asthma AND (eczema OR "atopic dermatitis")	36	3568	IL5RA	-	80	8	2.867e-12	25523412 (p=4.05e-04), 24332579 (p=4.12e-04), 17362254 (p=4.15e-04), 20735756 (p=7.01e-04), 17703412 (p=2.50e-03), 19247692 (p=5.40e-03), 20536507 (p=6.30e-03), 22560479 (p=8.30e-03),
comorbidity AND asthma AND (eczema OR "atopic dermatitis")	37	57628	DPP10	-	47	7	5.257e-12	20085599 (p=4.11e-04), 15829243 (p=1.70e-03), 19996348 (p=2.10e-03), 17703412 (p=2.50e-03), 17702965 (p=3.90e-03), 19247692 (p=5.40e-03), 20701904 (p=7.30e-03),
comorbidity AND asthma AND (eczema OR "atopic dermatitis")	38	9370	ADIPOQ	-	1655	21	5.149e-12	19725899 (p=4.19e-04), 18442802 (p=4.19e-04), 24147569 (p=4.20e-04), 18221467 (p=4.22e-04), 20593932 (p=9.00e-04), 20188864 (p=1.20e-03), 15292348 (p=1.40e-03), 17119002 (p=2.00e-03), 20499348 (p=3.50e-03), 19236311 (p=3.70e-03),
comorbidity AND asthma AND (eczema OR "atopic dermatitis")	39	3606	IL18	-	758	15	6.803e-12	16433859 (p=4.04e-04), 24167151 (p=4.04e-04), 18093181 (p=6.04e-04), 20418295 (p=9.01e-04), 21448661 (p=9.01e-04), 16759385 (p=1.20e-03), 22840759 (p=1.70e-03), 24711060 (p=1.70e-03), 22686311 (p=2.00e-03), 17703412 (p=2.50e-03),
comorbidity AND asthma AND (eczema OR "atopic dermatitis")	40	4153	MBL2	-	641	14	8.592e-12	22512728 (p=6.06e-04), 17014624 (p=7.01e-04), 18700861 (p=1.10e-03), 17651383 (p=1.20e-03), 16178865 (p=1.70e-03), 20298391 (p=2.20e-03), 17703412 (p=2.50e-03), 11255386 (p=4.70e-03), 25326706 (p=5.10e-03), 19789190 (p=6.20e-03),
comorbidity AND asthma AND (eczema OR "atopic dermatitis")	41	3952	LEP	-	1236	18	1.12e-11	19725899 (p=4.19e-04), 24147569 (p=4.20e-04), 18221467 (p=4.22e-04), 19191138 (p=9.02e-04), 23561045 (p=1.10e-03), 23648099 (p=1.40e-03), 21721375 (p=3.50e-03), 25118115 (p=3.90e-03), 12364439 (p=4.80e-03), 21631924 (p=4.80e-03),
comorbidity AND asthma AND (eczema OR "atopic dermatitis")	42	7040	TGFB1	-	3084	28	1.453e-11	20085599 (p=4.11e-04), 19096005 (p=4.21e-04), 17333284 (p=7.01e-04), 15120189 (p=1.40e-03), 17703412 (p=2.50e-03), 25119113 (p=2.80e-03), 20599261 (p=3.30e-03), 20395963 (p=3.30e-03), 19046298 (p=5.10e-03), 24074435 (p=5.40e-03),
comorbidity AND asthma AND (eczema OR "atopic dermatitis")	43	6352	CCL5	-	571	13	2.576e-11	23180368 (p=6.06e-04), 11544456 (p=7.03e-04), 11197694 (p=1.10e-03), 22444510 (p=1.10e-03), 19099677 (p=2.00e-03), 12789231 (p=2.10e-03), 17703412 (p=2.50e-03), 16614115 (p=2.90e-03), 20395963 (p=3.30e-03), 15592421 (p=3.50e-03),
comorbidity AND asthma AND (eczema OR "atopic dermatitis")	44	627	BDNF	-	1343	18	3.821e-11	21723144 (p=4.17e-04), 19895626 (p=7.00e-04), 17584309 (p=1.00e-03), 25649076 (p=2.00e-03), 20874832 (p=2.00e-03), 23182421 (p=2.10e-03), 23266638 (p=2.90e-03), 20573217 (p=3.70e-03), 18179783 (p=4.80e-03), 24683520 (p=5.90e-03),
comorbidity AND asthma AND (eczema OR "atopic dermatitis")	45	1493	CTLA4	-	877	15	4.357e-11	16445777 (p=4.18e-04), 14720259 (p=1.40e-03), 17703412 (p=2.50e-03), 20016193 (p=2.90e-03), 20395963 (p=3.30e-03), 12114354 (p=3.30e-03), 19824886 (p=4.80e-03), 19895409 (p=4.90e-03), 25326706 (p=5.10e-03), 19247692 (p=5.40e-03),
comorbidity AND asthma AND (eczema OR "atopic dermatitis")	46	10	NAT2	-	607	13	5.078e-11	23622008 (p=1.50e-03), 16533241 (p=2.10e-03), 22246524 (p=3.40e-03), 19608015 (p=4.00e-03), 19247692 (p=5.40e-03), 19789190 (p=6.20e-03), 12163321 (p=6.30e-03), 20088379 (p=6.50e-03), 19549810 (p=7.10e-03), 20701904 (p=7.30e-03),
comorbidity AND asthma AND (eczema OR "atopic dermatitis")	47	4049	LTA	-	521	12	1.208e-10	17450233 (p=4.18e-04), 11591192 (p=7.01e-04), 18385169 (p=9.00e-04), 21271873 (p=9.02e-04), 22464751 (p=2.30e-03), 17703412 (p=2.50e-03), 12169181 (p=2.60e-03), 20395963 (p=3.30e-03), 15976383 (p=3.50e-03), 19247692 (p=5.40e-03),
comorbidity AND asthma AND (eczema OR "atopic dermatitis")	48	10800	CYSLTR1	-	81	7	2.163e-10	19733299 (p=4.11e-04), 16846449 (p=4.15e-04), 17703412 (p=2.50e-03), 19080797 (p=4.80e-03), 17153879 (p=4.80e-03), 23181793 (p=4.90e-03), 16776674 (p=5.40e-03),
comorbidity AND asthma AND (eczema OR "atopic dermatitis")	49	3458	IFNG	-	1525	18	2.423e-10	24167151 (p=4.04e-04), 15007355 (p=4.14e-04), 19552791 (p=4.18e-04), 21798578 (p=4.22e-04), 19735490 (p=6.01e-04), 20194818 (p=9.02e-04), 19639725 (p=9.02e-04), 22698804 (p=1.10e-03), 15120189 (p=1.40e-03), 24995662 (p=2.00e-03),
comorbidity AND asthma AND (eczema OR "atopic dermatitis")	50	4160	MC4R	-	324	10	2.816e-10	16032553 (p=9.02e-04), 16507637 (p=1.00e-03), 24348519 (p=1.70e-03), 19255736 (p=1.70e-03), 24040077 (p=2.10e-03), 19153581 (p=2.90e-03), 18777518 (p=3.50e-03), 12032748 (p=4.90e-03), 17492953 (p=5.60e-03), 19284607 (p=8.00e-03),
comorbidity AND asthma AND (eczema OR "atopic dermatitis")	51	4056	LTC4S	-	87	7	3.4e-10	19862937 (p=6.04e-04), 20395963 (p=3.30e-03), 19080797 (p=4.80e-03), 17153879 (p=4.80e-03), 22722751 (p=5.00e-03), 19247692 (p=5.40e-03), 20536507 (p=6.30e-03),
comorbidity AND asthma AND (eczema OR "atopic dermatitis")	52	4128	MAOA	-	461	11	4.717e-10	23215821 (p=1.70e-03), 18188752 (p=2.10e-03), 23076524 (p=4.80e-03), 16814261 (p=5.90e-03), 16741202 (p=6.00e-03), 18430257 (p=6.20e-03), 21099450 (p=6.20e-03), 18075472 (p=6.40e-03), 19357553 (p=7.10e-03), 24805005 (p=8.00e-03),
comorbidity AND asthma AND (eczema OR "atopic dermatitis")	53	6037	RNASE3	-	100	7	8.841e-10	19133919 (p=5.00e-04), 17362255 (p=6.07e-04), 20534163 (p=9.02e-04), 23406588 (p=2.30e-03), 21038779 (p=2.90e-03), 12100059 (p=4.80e-03), 24814827 (p=6.20e-03),
comorbidity AND asthma AND (eczema OR "atopic dermatitis")	54	3578	IL9	-	102	7	9.992e-10	17703412 (p=2.50e-03), 17083349 (p=2.90e-03), 16611254 (p=3.50e-03), 7666875 (p=4.10e-03), 24468256 (p=4.80e-03), 21371865 (p=4.80e-03), 18349591 (p=9.40e-03),
comorbidity AND asthma AND (eczema OR "atopic dermatitis")	55	54106	TLR9	-	500	11	1.042e-09	20085599 (p=4.11e-04), 21689850 (p=1.10e-03), 19096003 (p=1.40e-03), 19639721 (p=1.40e-03), 17703412 (p=2.50e-03), 17000223 (p=3.50e-03), 18312481 (p=4.50e-03), 19254290 (p=4.80e-03), 19247692 (p=5.40e-03), 19789190 (p=6.20e-03),
comorbidity AND asthma AND (eczema OR "atopic dermatitis")	56	2875	GPT	-	103	7	1.033e-09	23522007 (p=7.00e-04), 23403445 (p=1.70e-03), 21720553 (p=4.70e-03), 14506613 (p=4.80e-03), 19217453 (p=6.20e-03), 22177542 (p=8.40e-03), 23119080 (p=9.00e-03),
comorbidity AND asthma AND (eczema OR "atopic dermatitis")	57	1636	ACE	-	2167	20	1.666e-09	22361338 (p=4.12e-04), 19484664 (p=7.02e-04), 17014625 (p=9.00e-04), 21889830 (p=9.01e-04), 16769256 (p=2.80e-03), 22741763 (p=3.50e-03), 19423314 (p=4.10e-03), 11860787 (p=4.50e-03), 17032288 (p=4.50e-03), 20682755 (p=4.80e-03),
comorbidity AND asthma AND (eczema OR "atopic dermatitis")	58	11251	PTGDR2	-	57	6	1.75e-09	19392992 (p=4.18e-04), 19290788 (p=2.20e-03), 19247692 (p=5.40e-03), 21762224 (p=7.70e-03), 22947041 (p=7.70e-03), 17016057 (p=8.40e-03),
comorbidity AND asthma AND (eczema OR "atopic dermatitis")	59	26191	PTPN22	-	408	10	2.206e-09	20560812 (p=3.40e-03), 19248096 (p=3.50e-03), 19895409 (p=4.90e-03), 17579671 (p=5.10e-03), 20016199 (p=5.40e-03), 17553139 (p=5.90e-03), 22722472 (p=6.00e-03), 23936838 (p=7.70e-03), 23098231 (p=7.80e-03), 15943829 (p=8.30e-03),
comorbidity AND asthma AND (eczema OR "atopic dermatitis")	60	1312	COMT	-	1432	16	3.265e-09	17636223 (p=1.50e-03), 20868372 (p=1.70e-03), 16679343 (p=3.20e-03), 12627475 (p=3.40e-03), 22416031 (p=3.40e-03), 21135332 (p=3.50e-03), 22466345 (p=4.10e-03), 16275815 (p=4.80e-03), 18663369 (p=4.80e-03), 21501166 (p=4.90e-03),
comorbidity AND asthma AND (eczema OR "atopic dermatitis")	61	4842	NOS1	-	311	9	3.779e-09	16238787 (p=1.30e-03), 12911502 (p=1.70e-03), 15080837 (p=2.10e-03), 17703412 (p=2.50e-03), 20395963 (p=3.30e-03), 19247692 (p=5.40e-03), 19603529 (p=6.60e-03), 17690329 (p=8.00e-03), 19657898 (p=9.20e-03),
comorbidity AND asthma AND (eczema OR "atopic dermatitis")	62	26762	HAVCR1	-	128	7	4.336e-09	15007635 (p=4.18e-04), 17703412 (p=2.50e-03), 16940744 (p=3.80e-03), 22857392 (p=4.80e-03), 19247692 (p=5.40e-03), 14637143 (p=7.40e-03), 15867855 (p=7.90e-03),
comorbidity AND asthma AND (eczema OR "atopic dermatitis")	63	3562	IL3	-	130	7	4.758e-09	23953855 (p=4.13e-04), 17362254 (p=4.15e-04), 24684517 (p=4.19e-04), 23978640 (p=2.00e-03), 17703412 (p=2.50e-03), 15372320 (p=3.90e-03), 19247692 (p=5.40e-03),
comorbidity AND asthma AND (eczema OR "atopic dermatitis")	64	675	BRCA2	-	1294	15	5.382e-09	16168130 (p=1.00e-03), 16541324 (p=1.70e-03), 16622123 (p=2.60e-03), 16137751 (p=3.80e-03), 12611452 (p=3.90e-03), 16118051 (p=4.70e-03), 21149333 (p=4.80e-03), 20452659 (p=5.10e-03), 15986445 (p=5.70e-03), 12473589 (p=5.70e-03),
comorbidity AND asthma AND (eczema OR "atopic dermatitis")	65	6915	TBXA2R	-	134	7	5.707e-09	12000493 (p=6.07e-04), 22017802 (p=1.70e-03), 15805995 (p=1.90e-03), 21070398 (p=2.00e-03), 20395963 (p=3.30e-03), 19247692 (p=5.40e-03), 18031559 (p=5.90e-03),
comorbidity AND asthma AND (eczema OR "atopic dermatitis")	66	9173	IL1RL1	-	134	7	5.62e-09	24568840 (p=4.22e-04), 20503266 (p=2.10e-03), 20860503 (p=2.90e-03), 23028483 (p=4.50e-03), 19247692 (p=5.40e-03), 19852851 (p=7.90e-03), 23817569 (p=8.00e-03),
comorbidity AND asthma AND (eczema OR "atopic dermatitis")	67	718	C3	-	458	10	5.853e-09	21801245 (p=4.08e-04), 17703412 (p=2.50e-03), 18631248 (p=2.60e-03), 20395963 (p=3.30e-03), 18805911 (p=3.90e-03), 18566738 (p=4.90e-03), 19247692 (p=5.40e-03), 21816153 (p=7.90e-03), 16355111 (p=8.40e-03), 15278436 (p=9.60e-03),
comorbidity AND asthma AND (eczema OR "atopic dermatitis")	68	6531	SLC6A3	-	654	11	1.339e-08	23215821 (p=1.70e-03), 17485610 (p=1.70e-03), 18188752 (p=2.10e-03), 18206700 (p=2.30e-03), 16389200 (p=4.80e-03), 23076524 (p=4.80e-03), 17157268 (p=6.00e-03), 19789190 (p=6.20e-03), 9837830 (p=7.10e-03), 16389711 (p=7.30e-03),
comorbidity AND asthma AND (eczema OR "atopic dermatitis")	69	1232	CCR3	-	168	7	2.611e-08	20726325 (p=4.15e-04), 20220260 (p=4.17e-04), 11307756 (p=2.20e-03), 17703412 (p=2.50e-03), 17135764 (p=2.60e-03), 17845580 (p=4.80e-03), 19247692 (p=5.40e-03),
comorbidity AND asthma AND (eczema OR "atopic dermatitis")	70	56946	C11orf30	-	47	5	6.213e-08	22036096 (p=6.05e-04), 23886662 (p=9.01e-04), 20503266 (p=2.10e-03), 25546184 (p=2.60e-03), 23817569 (p=8.00e-03),
comorbidity AND asthma AND (eczema OR "atopic dermatitis")	71	6361	CCL17	-	107	6	6.794e-08	22017510 (p=7.02e-04), 24628072 (p=1.70e-03), 17703412 (p=2.50e-03), 14767451 (p=3.90e-03), 18266834 (p=7.50e-03), 24698291 (p=8.30e-03),
comorbidity AND asthma AND (eczema OR "atopic dermatitis")	72	4846	NOS3	-	1647	15	1.02e-07	20955262 (p=1.00e-03), 16238787 (p=1.30e-03), 22304542 (p=2.80e-03), 19968769 (p=3.50e-03), 18486767 (p=3.70e-03), 24278136 (p=5.40e-03), 19247692 (p=5.40e-03), 19789190 (p=6.20e-03), 20536507 (p=6.30e-03), 16520888 (p=6.40e-03),
comorbidity AND asthma AND (eczema OR "atopic dermatitis")	73	1394	CRHR1	-	209	7	1.119e-07	22748421 (p=1.70e-03), 17597588 (p=3.50e-03), 19247692 (p=5.40e-03), 20029939 (p=6.50e-03), 18250257 (p=6.60e-03), 19607758 (p=8.40e-03), 24099078 (p=9.10e-03),
comorbidity AND asthma AND (eczema OR "atopic dermatitis")	74	9415	FADS2	-	121	6	1.369e-07	21793953 (p=4.13e-04), 22629455 (p=1.70e-03), 16670158 (p=3.70e-03), 24934276 (p=6.20e-03), 20948998 (p=7.90e-03), 20045144 (p=8.10e-03),
comorbidity AND asthma AND (eczema OR "atopic dermatitis")	75	50943	FOXP3	-	648	10	1.354e-07	20028375 (p=6.02e-04), 19679154 (p=8.00e-04), 21107665 (p=2.10e-03), 16551363 (p=2.20e-03), 17703412 (p=2.50e-03), 20599261 (p=3.30e-03), 25113399 (p=3.90e-03), 11120765 (p=5.00e-03), 16091206 (p=5.70e-03), 20654176 (p=6.70e-03),
comorbidity AND asthma AND (eczema OR "atopic dermatitis")	76	383	ARG1	-	122	6	1.4e-07	16387594 (p=4.19e-04), 19281908 (p=2.10e-03), 17703412 (p=2.50e-03), 18478052 (p=4.80e-03), 19789190 (p=6.20e-03), 18617639 (p=6.50e-03),
comorbidity AND asthma AND (eczema OR "atopic dermatitis")	77	90865	IL33	-	228	7	1.929e-07	25746970 (p=4.21e-04), 24568840 (p=4.22e-04), 22627366 (p=6.02e-04), 20860503 (p=2.90e-03), 23472165 (p=6.20e-03), 22329990 (p=7.90e-03), 23817569 (p=8.00e-03),
comorbidity AND asthma AND (eczema OR "atopic dermatitis")	78	10333	TLR6	-	129	6	1.907e-07	24445834 (p=4.20e-04), 16188043 (p=1.70e-03), 17703412 (p=2.50e-03), 19254290 (p=4.80e-03), 19247692 (p=5.40e-03), 23817569 (p=8.00e-03),
comorbidity AND asthma AND (eczema OR "atopic dermatitis")	79	5444	PON1	-	915	11	3.331e-07	20221876 (p=1.40e-03), 23406590 (p=2.00e-03), 19022366 (p=2.10e-03), 16008163 (p=3.90e-03), 19646734 (p=3.90e-03), 12417809 (p=5.40e-03), 20536507 (p=6.30e-03), 20056567 (p=7.10e-03), 24834831 (p=8.30e-03), 16002382 (p=9.10e-03),
comorbidity AND asthma AND (eczema OR "atopic dermatitis")	80	5729	PTGDR	-	70	5	4.209e-07	19220773 (p=1.70e-03), 12119603 (p=2.00e-03), 23181793 (p=4.90e-03), 19247692 (p=5.40e-03), 21199159 (p=8.30e-03),
comorbidity AND asthma AND (eczema OR "atopic dermatitis")	81	3605	IL17A	-	744	10	4.457e-07	25562560 (p=3.00e-04), 20437253 (p=1.00e-03), 19210369 (p=2.10e-03), 25223230 (p=2.10e-03), 17703412 (p=2.50e-03), 24141678 (p=2.90e-03), 21245272 (p=4.80e-03), 21980832 (p=5.60e-03), 21546069 (p=5.70e-03), 22507625 (p=9.60e-03),
comorbidity AND asthma AND (eczema OR "atopic dermatitis")	82	729230	CCR2	-	415	8	6.068e-07	19082218 (p=4.04e-04), 20220260 (p=4.17e-04), 17703412 (p=2.50e-03), 17135764 (p=2.60e-03), 18615095 (p=2.90e-03), 20536507 (p=6.30e-03), 23454776 (p=8.10e-03), 19055601 (p=8.20e-03),
comorbidity AND asthma AND (eczema OR "atopic dermatitis")	83	81793	TLR10	-	77	5	6.585e-07	17703412 (p=2.50e-03), 15201134 (p=2.90e-03), 19254290 (p=4.80e-03), 19247692 (p=5.40e-03), 23817569 (p=8.00e-03),
comorbidity AND asthma AND (eczema OR "atopic dermatitis")	84	3552	IL1A	-	793	10	7.672e-07	12752325 (p=1.70e-03), 12209090 (p=2.10e-03), 18416756 (p=2.10e-03), 17703412 (p=2.50e-03), 15974847 (p=3.80e-03), 19247692 (p=5.40e-03), 19431193 (p=6.00e-03), 19789190 (p=6.20e-03), 20536507 (p=6.30e-03), 15007345 (p=7.30e-03),
comorbidity AND asthma AND (eczema OR "atopic dermatitis")	85	84868	HAVCR2	-	166	6	7.886e-07	16159638 (p=4.20e-04), 17703412 (p=2.50e-03), 16940744 (p=3.80e-03), 19566956 (p=5.40e-03), 19789190 (p=6.20e-03), 15867855 (p=7.90e-03),
comorbidity AND asthma AND (eczema OR "atopic dermatitis")	86	3593	IL12B	-	436	8	8.418e-07	15007350 (p=4.16e-04), 15322986 (p=1.10e-03), 17703412 (p=2.50e-03), 20395963 (p=3.30e-03), 15356557 (p=3.30e-03), 19247692 (p=5.40e-03), 24654313 (p=5.50e-03), 12241719 (p=6.60e-03),
comorbidity AND asthma AND (eczema OR "atopic dermatitis")	87	10392	NOD1	-	172	6	9.511e-07	16918516 (p=4.09e-04), 15990792 (p=4.22e-04), 20395963 (p=3.30e-03), 19247692 (p=5.40e-03), 15718249 (p=6.00e-03), 17620097 (p=8.10e-03),
comorbidity AND asthma AND (eczema OR "atopic dermatitis")	88	5265	SERPINA1	-	457	8	1.175e-06	22912729 (p=2.10e-03), 20298391 (p=2.20e-03), 22414631 (p=2.90e-03), 12612303 (p=2.90e-03), 14616761 (p=6.00e-03), 19789190 (p=6.20e-03), 22971141 (p=8.40e-03), 17659342 (p=9.60e-03),
comorbidity AND asthma AND (eczema OR "atopic dermatitis")	89	3553	IL1B	-	2138	15	1.937e-06	18416756 (p=2.10e-03), 17703412 (p=2.50e-03), 21440944 (p=2.80e-03), 15974847 (p=3.80e-03), 24853301 (p=4.50e-03), 12694213 (p=5.00e-03), 18926055 (p=5.10e-03), 19247692 (p=5.40e-03), 24654313 (p=5.50e-03), 19096964 (p=5.90e-03),
comorbidity AND asthma AND (eczema OR "atopic dermatitis")	90	5054	SERPINE1	-	1115	11	1.994e-06	22361338 (p=4.12e-04), 19063817 (p=7.00e-04), 22578058 (p=1.90e-03), 16789641 (p=2.20e-03), 21530867 (p=2.60e-03), 16409202 (p=3.80e-03), 19247692 (p=5.40e-03), 21478212 (p=5.80e-03), 20536507 (p=6.30e-03), 16896567 (p=6.50e-03),
comorbidity AND asthma AND (eczema OR "atopic dermatitis")	91	3142	HLX	-	36	4	2.065e-06	22303482 (p=1.10e-03), 19295429 (p=1.40e-03), 19038437 (p=1.90e-03), 19362357 (p=4.20e-03),
comorbidity AND asthma AND (eczema OR "atopic dermatitis")	92	672	BRCA1	-	2159	15	2.101e-06	16168130 (p=1.00e-03), 16541324 (p=1.70e-03), 16622123 (p=2.60e-03), 16137751 (p=3.80e-03), 12611452 (p=3.90e-03), 16118051 (p=4.70e-03), 21149333 (p=4.80e-03), 20452659 (p=5.10e-03), 15986445 (p=5.70e-03), 12473589 (p=5.70e-03),
comorbidity AND asthma AND (eczema OR "atopic dermatitis")	93	5468	PPARG	-	1639	13	2.347e-06	21540831 (p=3.40e-03), 15543217 (p=3.50e-03), 18598350 (p=3.50e-03), 17329993 (p=3.50e-03), 17805473 (p=3.90e-03), 17322631 (p=4.70e-03), 20075150 (p=4.80e-03), 21548985 (p=5.50e-03), 19789190 (p=6.20e-03), 20536507 (p=6.30e-03),
comorbidity AND asthma AND (eczema OR "atopic dermatitis")	94	7421	VDR	-	1435	12	3.387e-06	15282200 (p=1.00e-03), 17703412 (p=2.50e-03), 17211561 (p=3.50e-03), 22130867 (p=3.80e-03), 15651992 (p=4.50e-03), 19247692 (p=5.40e-03), 22681928 (p=5.50e-03), 23975061 (p=5.60e-03), 20536507 (p=6.30e-03), 19745160 (p=7.30e-03),
comorbidity AND asthma AND (eczema OR "atopic dermatitis")	95	10850	CCL27	-	41	4	3.389e-06	22017510 (p=7.02e-04), 17703412 (p=2.50e-03), 14767451 (p=3.90e-03), 18266834 (p=7.50e-03),
comorbidity AND asthma AND (eczema OR "atopic dermatitis")	96	2625	GATA3	-	243	6	6.589e-06	18410415 (p=4.22e-04), 18037162 (p=5.00e-04), 17703412 (p=2.50e-03), 15637551 (p=3.50e-03), 19247692 (p=5.40e-03), 23817569 (p=8.00e-03),
comorbidity AND asthma AND (eczema OR "atopic dermatitis")	97	2207	FCER1G	-	49	4	6.904e-06	17430357 (p=6.05e-04), 11980568 (p=8.01e-04), 20028371 (p=2.00e-03), 12836193 (p=5.90e-03),
comorbidity AND asthma AND (eczema OR "atopic dermatitis")	98	3992	FADS1	-	129	5	7.443e-06	21793953 (p=4.13e-04), 22629455 (p=1.70e-03), 16670158 (p=3.70e-03), 20948998 (p=7.90e-03), 20045144 (p=8.10e-03),
comorbidity AND asthma AND (eczema OR "atopic dermatitis")	99	256076	COL6A5	-	12	3	9.022e-06	21353297 (p=4.13e-04), 17850181 (p=9.01e-04), 24348519 (p=1.70e-03),
comorbidity AND asthma AND (eczema OR "atopic dermatitis")	100	3075	CFH	-	614	8	9.389e-06	18704199 (p=2.90e-03), 18164066 (p=3.40e-03), 25880396 (p=4.80e-03), 17472578 (p=5.90e-03), 16431947 (p=6.40e-03), 20605213 (p=7.90e-03), 18538409 (p=7.90e-03), 21816153 (p=7.90e-03),
comorbidity AND asthma AND (eczema OR "atopic dermatitis")	101	6347	CCL2	-	1074	10	9.481e-06	23180368 (p=6.06e-04), 15005768 (p=7.00e-04), 11544456 (p=7.03e-04), 19496969 (p=9.02e-04), 17703412 (p=2.50e-03), 18615095 (p=2.90e-03), 19247692 (p=5.40e-03), 23454776 (p=8.10e-03), 19055601 (p=8.20e-03), 20962626 (p=9.20e-03),
comorbidity AND asthma AND (eczema OR "atopic dermatitis")	102	1234	CCR5	-	1345	11	1.035e-05	20220260 (p=4.17e-04), 21465943 (p=4.18e-04), 12612298 (p=4.19e-04), 17703412 (p=2.50e-03), 17135764 (p=2.60e-03), 16614115 (p=2.90e-03), 18972295 (p=3.30e-03), 12023175 (p=4.10e-03), 19247692 (p=5.40e-03), 20536507 (p=6.30e-03),
comorbidity AND asthma AND (eczema OR "atopic dermatitis")	103	3176	HNMT	-	57	4	1.205e-05	19025430 (p=4.19e-04), 17651147 (p=1.40e-03), 17703412 (p=2.50e-03), 19247692 (p=5.40e-03),
comorbidity AND asthma AND (eczema OR "atopic dermatitis")	104	4843	NOS2	-	641	8	1.24e-05	16703578 (p=1.30e-03), 17177683 (p=1.70e-03), 17703412 (p=2.50e-03), 11692109 (p=2.90e-03), 19996333 (p=4.70e-03), 19247692 (p=5.40e-03), 18774388 (p=6.20e-03), 20536507 (p=6.30e-03),
comorbidity AND asthma AND (eczema OR "atopic dermatitis")	105	3557	IL1RN	-	869	9	1.267e-05	17107994 (p=1.40e-03), 16409203 (p=1.40e-03), 17703412 (p=2.50e-03), 23014359 (p=3.80e-03), 12694213 (p=5.00e-03), 18926055 (p=5.10e-03), 19247692 (p=5.40e-03), 19431193 (p=6.00e-03), 16540751 (p=8.50e-03),
comorbidity AND asthma AND (eczema OR "atopic dermatitis")	106	30009	TBX21	-	146	5	1.272e-05	17949803 (p=4.21e-04), 22303482 (p=1.10e-03), 16179640 (p=2.10e-03), 17703412 (p=2.50e-03), 19362357 (p=4.20e-03),
comorbidity AND asthma AND (eczema OR "atopic dermatitis")	107	1728	NQO1	-	466	7	1.704e-05	20526719 (p=1.10e-03), 20049212 (p=5.30e-03), 19789190 (p=6.20e-03), 16520888 (p=6.40e-03), 20701904 (p=7.30e-03), 19027876 (p=8.40e-03), 20824655 (p=9.60e-03),
comorbidity AND asthma AND (eczema OR "atopic dermatitis")	108	3576	CXCL8	-	1713	12	1.708e-05	19496969 (p=9.02e-04), 20194818 (p=9.02e-04), 18416756 (p=2.10e-03), 17703412 (p=2.50e-03), 15356575 (p=2.90e-03), 24102466 (p=3.90e-03), 24853301 (p=4.50e-03), 25326706 (p=5.10e-03), 19247692 (p=5.40e-03), 19789190 (p=6.20e-03),
comorbidity AND asthma AND (eczema OR "atopic dermatitis")	109	1672	DEFB1	-	160	5	1.945e-05	22059360 (p=1.70e-03), 16435024 (p=4.50e-03), 20618470 (p=5.90e-03), 19789190 (p=6.20e-03), 15696078 (p=8.30e-03),
comorbidity AND asthma AND (eczema OR "atopic dermatitis")	110	6356	CCL11	-	165	5	2.242e-05	23180368 (p=6.06e-04), 17703412 (p=2.50e-03), 17845580 (p=4.80e-03), 19247692 (p=5.40e-03), 20536507 (p=6.30e-03),
comorbidity AND asthma AND (eczema OR "atopic dermatitis")	111	3117	HLA-DQA1	-	717	8	2.634e-05	19052351 (p=4.15e-04), 12890388 (p=9.02e-04), 15853903 (p=2.00e-03), 19895409 (p=4.90e-03), 18585974 (p=6.50e-03), 23817569 (p=8.00e-03), 19858318 (p=8.40e-03), 16540751 (p=8.50e-03),
comorbidity AND asthma AND (eczema OR "atopic dermatitis")	112	64478	CSMD1	-	76	4	3.552e-05	23453885 (p=2.90e-03), 25456346 (p=5.10e-03), 22424883 (p=5.90e-03), 23472165 (p=6.20e-03),
comorbidity AND asthma AND (eczema OR "atopic dermatitis")	113	727	C5	-	186	5	3.933e-05	20143644 (p=4.07e-04), 17703412 (p=2.50e-03), 19247692 (p=5.40e-03), 20536507 (p=6.30e-03), 15278436 (p=9.60e-03),
comorbidity AND asthma AND (eczema OR "atopic dermatitis")	114	5097	PCDH1	-	20	3	4.04e-05	23050600 (p=4.21e-04), 23988763 (p=9.02e-04), 21929597 (p=4.80e-03),
comorbidity AND asthma AND (eczema OR "atopic dermatitis")	115	2638	GC	-	195	5	4.871e-05	24447085 (p=1.40e-03), 14987123 (p=3.80e-03), 20536507 (p=6.30e-03), 24646907 (p=7.70e-03), 19852851 (p=7.90e-03),
comorbidity AND asthma AND (eczema OR "atopic dermatitis")	116	7941	PLA2G7	-	196	5	4.952e-05	23413990 (p=3.30e-03), 23103135 (p=3.80e-03), 19247692 (p=5.40e-03), 10733466 (p=5.90e-03), 22338104 (p=6.50e-03),
comorbidity AND asthma AND (eczema OR "atopic dermatitis")	117	117156	SCGB3A2	-	24	3	6.974e-05	21410962 (p=3.30e-03), 19247692 (p=5.40e-03), 21170691 (p=7.80e-03),
comorbidity AND asthma AND (eczema OR "atopic dermatitis")	118	6367	CCL22	-	92	4	7.258e-05	23106659 (p=4.16e-04), 17703412 (p=2.50e-03), 19175890 (p=6.00e-03), 18266834 (p=7.50e-03),
comorbidity AND asthma AND (eczema OR "atopic dermatitis")	119	3594	IL12RB1	-	93	4	7.516e-05	21689850 (p=1.10e-03), 17703412 (p=2.50e-03), 19247692 (p=5.40e-03), 16159888 (p=7.90e-03),
comorbidity AND asthma AND (eczema OR "atopic dermatitis")	120	2615	LRRC32	-	25	3	7.722e-05	22036096 (p=6.05e-04), 23886662 (p=9.01e-04), 23817569 (p=8.00e-03),
comorbidity AND asthma AND (eczema OR "atopic dermatitis")	121	9	NAT1	-	219	5	8.158e-05	15095308 (p=3.50e-03), 19789190 (p=6.20e-03), 19549810 (p=7.10e-03), 20701904 (p=7.30e-03), 16434594 (p=9.10e-03),
comorbidity AND asthma AND (eczema OR "atopic dermatitis")	122	1215	CMA1	-	100	4	9.796e-05	15248847 (p=9.00e-04), 20736038 (p=1.10e-03), 16134991 (p=2.10e-03), 18973102 (p=4.80e-03),
comorbidity AND asthma AND (eczema OR "atopic dermatitis")	123	56729	RETN	-	410	6	0.0001045	18221467 (p=4.22e-04), 23648099 (p=1.40e-03), 20093199 (p=6.00e-03), 22886618 (p=6.30e-03), 16313475 (p=6.50e-03), 23685419 (p=6.60e-03),
comorbidity AND asthma AND (eczema OR "atopic dermatitis")	124	4018	LPA	-	245	5	0.0001373	18682798 (p=3.30e-03), 24888427 (p=7.00e-03), 20971364 (p=7.00e-03), 22485129 (p=7.70e-03), 22748161 (p=8.10e-03),
comorbidity AND asthma AND (eczema OR "atopic dermatitis")	125	1906	EDN1	-	669	7	0.000152	11991554 (p=1.70e-03), 11831453 (p=2.50e-03), 17703412 (p=2.50e-03), 19730395 (p=2.60e-03), 19247692 (p=5.40e-03), 15369130 (p=7.30e-03), 18580062 (p=9.60e-03),
comorbidity AND asthma AND (eczema OR "atopic dermatitis")	126	1813	DRD2	-	936	8	0.0001565	18188752 (p=2.10e-03), 16679343 (p=3.20e-03), 22531292 (p=3.50e-03), 14643564 (p=3.50e-03), 24283216 (p=3.80e-03), 19789190 (p=6.20e-03), 17069991 (p=8.00e-03), 11331109 (p=8.00e-03),
comorbidity AND asthma AND (eczema OR "atopic dermatitis")	127	6095	RORA	-	115	4	0.0001642	20860503 (p=2.90e-03), 24142618 (p=4.70e-03), 22424883 (p=5.90e-03), 23565190 (p=6.20e-03),
comorbidity AND asthma AND (eczema OR "atopic dermatitis")	128	27159	CHIA	-	33	3	0.000171	20538957 (p=9.03e-04), 17703412 (p=2.50e-03), 19247692 (p=5.40e-03),
comorbidity AND asthma AND (eczema OR "atopic dermatitis")	129	51135	IRAK4	-	117	4	0.0001731	21738793 (p=2.20e-03), 17703412 (p=2.50e-03), 22932140 (p=3.70e-03), 19254290 (p=4.80e-03),
comorbidity AND asthma AND (eczema OR "atopic dermatitis")	130	3603	IL16	-	120	4	0.0001899	17703412 (p=2.50e-03), 17303923 (p=4.60e-03), 19789190 (p=6.20e-03), 14657881 (p=8.40e-03),
comorbidity AND asthma AND (eczema OR "atopic dermatitis")	131	241	ALOX5AP	-	122	4	0.0002012	18547289 (p=1.00e-03), 22537113 (p=2.00e-03), 22206291 (p=8.00e-03), 20067482 (p=8.60e-03),
comorbidity AND asthma AND (eczema OR "atopic dermatitis")	132	29851	ICOS	-	124	4	0.0002129	19175887 (p=2.01e-04), 19824886 (p=4.80e-03), 19247692 (p=5.40e-03), 21356099 (p=6.00e-03),
comorbidity AND asthma AND (eczema OR "atopic dermatitis")	133	386653	IL31	-	36	3	0.0002148	21294778 (p=2.30e-03), 17030248 (p=4.90e-03), 25270263 (p=5.90e-03),
comorbidity AND asthma AND (eczema OR "atopic dermatitis")	134	55054	ATG16L1	-	129	4	0.0002453	20024904 (p=4.90e-03), 18088053 (p=6.40e-03), 21206965 (p=7.30e-03), 18366306 (p=7.50e-03),
comorbidity AND asthma AND (eczema OR "atopic dermatitis")	135	335	APOA1	-	774	7	0.000354	19218819 (p=4.21e-04), 22674204 (p=9.01e-04), 14567398 (p=2.10e-03), 12011770 (p=4.10e-03), 22287661 (p=4.70e-03), 20368199 (p=5.20e-03), 20538481 (p=6.00e-03),
comorbidity AND asthma AND (eczema OR "atopic dermatitis")	136	155	ADRB3	-	304	5	0.0003537	15543217 (p=3.50e-03), 14739355 (p=3.50e-03), 14506613 (p=4.80e-03), 20536507 (p=6.30e-03), 17264845 (p=7.10e-03),
comorbidity AND asthma AND (eczema OR "atopic dermatitis")	137	3479	IGF1	-	1383	9	0.0003615	19833751 (p=2.10e-03), 19728079 (p=3.30e-03), 24716226 (p=4.80e-03), 21521322 (p=6.20e-03), 18812263 (p=6.30e-03), 22154520 (p=9.00e-03), 17666477 (p=9.20e-03), 21698457 (p=9.20e-03), 24248481 (p=9.60e-03),
comorbidity AND asthma AND (eczema OR "atopic dermatitis")	138	114548	NLRP3	-	309	5	0.0003769	17178985 (p=3.30e-03), 22935299 (p=4.80e-03), 21109514 (p=5.60e-03), 17620097 (p=8.10e-03), 23440695 (p=9.00e-03),
comorbidity AND asthma AND (eczema OR "atopic dermatitis")	139	4321	MMP12	-	147	4	0.000396	23075521 (p=4.30e-03), 20546881 (p=4.90e-03), 20018959 (p=5.50e-03), 19789190 (p=6.20e-03),
comorbidity AND asthma AND (eczema OR "atopic dermatitis")	140	3077	HFE	-	798	7	0.0004133	16102632 (p=3.50e-03), 11960577 (p=3.70e-03), 23188073 (p=6.00e-03), 11812557 (p=6.20e-03), 14966054 (p=7.70e-03), 20145272 (p=8.70e-03), 14752836 (p=9.50e-03),
comorbidity AND asthma AND (eczema OR "atopic dermatitis")	141	125	ADH1B	-	316	5	0.0004105	23806636 (p=4.13e-04), 20357489 (p=4.15e-04), 16520888 (p=6.40e-03), 24553426 (p=7.50e-03), 22690706 (p=7.70e-03),
comorbidity AND asthma AND (eczema OR "atopic dermatitis")	142	3581	IL9R	-	46	3	0.0004253	17703412 (p=2.50e-03), 17083349 (p=2.90e-03), 21371865 (p=4.80e-03),
comorbidity AND asthma AND (eczema OR "atopic dermatitis")	143	3597	IL13RA1	-	49	3	0.0005117	17703412 (p=2.50e-03), 12522691 (p=3.50e-03), 17392323 (p=3.90e-03),
comorbidity AND asthma AND (eczema OR "atopic dermatitis")	144	2052	EPHX1	-	332	5	0.0005088	17711870 (p=1.10e-03), 19789190 (p=6.20e-03), 21183608 (p=6.20e-03), 17690329 (p=8.00e-03), 20932192 (p=8.90e-03),
comorbidity AND asthma AND (eczema OR "atopic dermatitis")	145	2289	FKBP5	-	160	4	0.0005296	24411633 (p=2.00e-03), 18349090 (p=7.70e-03), 21654733 (p=8.30e-03), 24099078 (p=9.10e-03),
comorbidity AND asthma AND (eczema OR "atopic dermatitis")	146	81704	DOCK8	-	50	3	0.0005328	24898675 (p=4.03e-04), 21931011 (p=3.30e-03), 22534316 (p=6.00e-03),
comorbidity AND asthma AND (eczema OR "atopic dermatitis")	147	1571	CYP2E1	-	569	6	0.0005474	14696128 (p=5.50e-03), 23007992 (p=6.00e-03), 19789190 (p=6.20e-03), 22335459 (p=7.90e-03), 16484137 (p=9.30e-03), 11700262 (p=9.60e-03),
comorbidity AND asthma AND (eczema OR "atopic dermatitis")	148	7096	TLR1	-	163	4	0.0005582	24445834 (p=4.20e-04), 17703412 (p=2.50e-03), 19254290 (p=4.80e-03), 23817569 (p=8.00e-03),
comorbidity AND asthma AND (eczema OR "atopic dermatitis")	149	3600	IL15	-	344	5	0.0005824	16333313 (p=4.17e-04), 16629787 (p=1.70e-03), 17703412 (p=2.50e-03), 19133918 (p=3.90e-03), 19247692 (p=5.40e-03),
comorbidity AND asthma AND (eczema OR "atopic dermatitis")	150	6346	CCL1	-	54	3	0.0006547	17703412 (p=2.50e-03), 15814739 (p=3.60e-03), 17845580 (p=4.80e-03),
comorbidity AND asthma AND (eczema OR "atopic dermatitis")	151	6927	HNF1A	-	361	5	0.0007224	20075150 (p=4.80e-03), 21224407 (p=5.10e-03), 21429061 (p=6.50e-03), 20971364 (p=7.00e-03), 20716378 (p=7.90e-03),
comorbidity AND asthma AND (eczema OR "atopic dermatitis")	152	2784	GNB3	-	363	5	0.0007367	22034052 (p=3.80e-03), 18783529 (p=4.70e-03), 20536507 (p=6.30e-03), 16487269 (p=8.40e-03), 23595158 (p=9.00e-03),
comorbidity AND asthma AND (eczema OR "atopic dermatitis")	153	1138	CHRNA5	-	178	4	0.000762	22017462 (p=4.10e-04), 22837378 (p=4.80e-03), 19300482 (p=5.90e-03), 22241830 (p=8.10e-03),
comorbidity AND asthma AND (eczema OR "atopic dermatitis")	154	1136	CHRNA3	-	182	4	0.0008258	22017462 (p=4.10e-04), 22837378 (p=4.80e-03), 19300482 (p=5.90e-03), 22241830 (p=8.10e-03),
comorbidity AND asthma AND (eczema OR "atopic dermatitis")	155	384	ARG2	-	59	3	0.000828	16387594 (p=4.19e-04), 19281908 (p=2.10e-03), 19789190 (p=6.20e-03),
comorbidity AND asthma AND (eczema OR "atopic dermatitis")	156	1543	CYP1A1	-	914	7	0.0008608	19022366 (p=2.10e-03), 16614107 (p=2.10e-03), 16580705 (p=4.90e-03), 19789190 (p=6.20e-03), 20088379 (p=6.50e-03), 20701904 (p=7.30e-03), 16484137 (p=9.30e-03),
comorbidity AND asthma AND (eczema OR "atopic dermatitis")	157	338	APOB	-	639	6	0.0009692	22674204 (p=9.01e-04), 14567398 (p=2.10e-03), 12011770 (p=4.10e-03), 20368199 (p=5.20e-03), 20538481 (p=6.00e-03), 20536507 (p=6.30e-03),
comorbidity AND asthma AND (eczema OR "atopic dermatitis")	158	6441	SFTPD	-	191	4	0.0009716	16426259 (p=1.70e-03), 17703412 (p=2.50e-03), 18355911 (p=3.30e-03), 19493231 (p=6.50e-03),
comorbidity AND asthma AND (eczema OR "atopic dermatitis")	159	1080	CFTR	-	1261	8	0.0009683	15781764 (p=2.00e-03), 20298391 (p=2.20e-03), 12881616 (p=3.90e-03), 16678395 (p=4.80e-03), 19247692 (p=5.40e-03), 15463854 (p=6.00e-03), 24568560 (p=6.20e-03), 18361452 (p=7.90e-03),
comorbidity AND asthma AND (eczema OR "atopic dermatitis")	160	3569	IL6	-	3314	13	0.001408	16344268 (p=4.16e-04), 16759385 (p=1.20e-03), 15120189 (p=1.40e-03), 17703412 (p=2.50e-03), 20599261 (p=3.30e-03), 12694213 (p=5.00e-03), 23784949 (p=5.40e-03), 21112385 (p=5.90e-03), 19789190 (p=6.20e-03), 20536507 (p=6.30e-03),
comorbidity AND asthma AND (eczema OR "atopic dermatitis")	161	8809	IL18R1	-	73	3	0.001513	17703412 (p=2.50e-03), 20860503 (p=2.90e-03), 23028483 (p=4.50e-03),
comorbidity AND asthma AND (eczema OR "atopic dermatitis")	162	83852	SETDB2	-	10	2	0.001615	20085599 (p=4.11e-04), 12754510 (p=2.10e-03),
comorbidity AND asthma AND (eczema OR "atopic dermatitis")	163	4048	LTA4H	-	78	3	0.001822	18547289 (p=1.00e-03), 22206291 (p=8.00e-03), 20067482 (p=8.60e-03),
comorbidity AND asthma AND (eczema OR "atopic dermatitis")	164	7177	TPSAB1	-	80	3	0.001953	24054365 (p=4.21e-04), 24372627 (p=6.07e-04), 23018683 (p=3.70e-03),
comorbidity AND asthma AND (eczema OR "atopic dermatitis")	165	240	ALOX5	-	231	4	0.001946	17703412 (p=2.50e-03), 16364163 (p=3.70e-03), 19247692 (p=5.40e-03), 23600541 (p=8.00e-03),
comorbidity AND asthma AND (eczema OR "atopic dermatitis")	166	6462	SHBG	-	231	4	0.001935	23463406 (p=6.00e-03), 17884445 (p=6.50e-03), 23066943 (p=7.70e-03), 16394089 (p=9.20e-03),
comorbidity AND asthma AND (eczema OR "atopic dermatitis")	167	4586	MUC5AC	-	237	4	0.002123	17703412 (p=2.50e-03), 24102466 (p=3.90e-03), 19789190 (p=6.20e-03), 23551418 (p=6.70e-03),
comorbidity AND asthma AND (eczema OR "atopic dermatitis")	168	6362	CCL18	-	85	3	0.002285	15494534 (p=1.90e-03), 17703412 (p=2.50e-03), 21539615 (p=6.20e-03),
comorbidity AND asthma AND (eczema OR "atopic dermatitis")	169	3659	IRF1	-	242	4	0.002274	18079498 (p=4.09e-04), 19295429 (p=1.40e-03), 17703412 (p=2.50e-03), 19247692 (p=5.40e-03),
comorbidity AND asthma AND (eczema OR "atopic dermatitis")	170	3460	IFNGR2	-	87	3	0.002421	17703412 (p=2.50e-03), 19247692 (p=5.40e-03), 19789190 (p=6.20e-03),
comorbidity AND asthma AND (eczema OR "atopic dermatitis")	171	5950	RBP4	-	254	4	0.002707	19949653 (p=7.02e-04), 23764679 (p=3.50e-03), 22308842 (p=3.60e-03), 21106915 (p=8.10e-03),
comorbidity AND asthma AND (eczema OR "atopic dermatitis")	172	1118	CHIT1	-	92	3	0.002826	20538957 (p=9.03e-04), 17693102 (p=1.10e-03), 23706714 (p=7.60e-03),
comorbidity AND asthma AND (eczema OR "atopic dermatitis")	173	1437	CSF2	-	261	4	0.00297	17362254 (p=4.15e-04), 17703412 (p=2.50e-03), 19247692 (p=5.40e-03), 20536507 (p=6.30e-03),
comorbidity AND asthma AND (eczema OR "atopic dermatitis")	174	3953	LEPR	-	504	5	0.002991	19191138 (p=9.02e-04), 12364439 (p=4.80e-03), 21631924 (p=4.80e-03), 18086776 (p=7.10e-03), 25751111 (p=8.60e-03),
comorbidity AND asthma AND (eczema OR "atopic dermatitis")	175	2908	NR3C1	-	853	6	0.004106	22469783 (p=2.20e-03), 17703412 (p=2.50e-03), 18952539 (p=4.60e-03), 21113676 (p=4.80e-03), 22801563 (p=5.90e-03), 16725041 (p=7.90e-03),
comorbidity AND asthma AND (eczema OR "atopic dermatitis")	176	4318	MMP9	-	2011	9	0.004207	22237587 (p=4.20e-04), 20181264 (p=6.01e-04), 18391843 (p=3.30e-03), 20395963 (p=3.30e-03), 22391064 (p=4.70e-03), 23639553 (p=4.80e-03), 19789190 (p=6.20e-03), 19958602 (p=8.60e-03), 18571010 (p=9.60e-03),
comorbidity AND asthma AND (eczema OR "atopic dermatitis")	177	3240	HP	-	290	4	0.004347	25493023 (p=3.80e-03), 23268292 (p=4.60e-03), 18258668 (p=5.60e-03), 17304451 (p=6.40e-03),
comorbidity AND asthma AND (eczema OR "atopic dermatitis")	178	728	C5AR1	-	109	3	0.00452	15144465 (p=6.02e-04), 19789190 (p=6.20e-03), 15278436 (p=9.60e-03),
comorbidity AND asthma AND (eczema OR "atopic dermatitis")	179	940	CD28	-	308	4	0.005408	17703412 (p=2.50e-03), 19824886 (p=4.80e-03), 21356099 (p=6.00e-03), 19852851 (p=7.90e-03),
comorbidity AND asthma AND (eczema OR "atopic dermatitis")	180	3592	IL12A	-	312	4	0.005648	18671862 (p=4.04e-04), 17703412 (p=2.50e-03), 15356557 (p=3.30e-03), 19789190 (p=6.20e-03),
comorbidity AND asthma AND (eczema OR "atopic dermatitis")	181	284110	GSDMA	-	20	2	0.006073	20860503 (p=2.90e-03), 21546069 (p=5.70e-03),
comorbidity AND asthma AND (eczema OR "atopic dermatitis")	182	123688	HYKK	-	21	2	0.006672	22837378 (p=4.80e-03), 19300482 (p=5.90e-03),
comorbidity AND asthma AND (eczema OR "atopic dermatitis")	183	3383	ICAM1	-	975	6	0.007903	17598660 (p=2.30e-03), 17703412 (p=2.50e-03), 25003170 (p=6.10e-03), 20536507 (p=6.30e-03), 20362293 (p=6.40e-03), 18751468 (p=8.50e-03),
comorbidity AND asthma AND (eczema OR "atopic dermatitis")	184	3560	IL2RB	-	138	3	0.008774	17703412 (p=2.50e-03), 20860503 (p=2.90e-03), 18774388 (p=6.20e-03),
comorbidity AND asthma AND (eczema OR "atopic dermatitis")	185	116519	APOA5	-	353	4	0.008772	25311932 (p=2.00e-03), 24903888 (p=4.10e-03), 21548985 (p=5.50e-03), 19403283 (p=8.40e-03),
comorbidity AND asthma AND rhinitis	1	2312	FLG	-	211	70	4.709e-118	19589816 (p=1.15e-04), 23078034 (p=2.01e-04), 18325573 (p=2.06e-04), 25174864 (p=2.06e-04), 18313126 (p=2.07e-04), 19348926 (p=2.07e-04), 25277085 (p=3.03e-04), 21365004 (p=3.05e-04), 25528737 (p=3.06e-04), 21219289 (p=3.10e-04),
comorbidity AND asthma AND rhinitis	2	3596	IL13	-	505	63	1.154e-79	22846750 (p=1.25e-04), 24447084 (p=2.04e-04), 16272823 (p=3.03e-04), 19254294 (p=3.07e-04), 15007355 (p=3.09e-04), 18417506 (p=4.01e-04), 17209513 (p=5.02e-04), 18037162 (p=6.04e-04), 22023794 (p=6.05e-04), 11709756 (p=6.07e-04),
comorbidity AND asthma AND rhinitis	3	154	ADRB2	-	885	51	2.102e-51	18709160 (p=3.01e-04), 20210814 (p=5.01e-04), 16935688 (p=6.01e-04), 24691493 (p=6.02e-04), 25074500 (p=6.02e-04), 18849614 (p=6.07e-04), 15170877 (p=1.00e-03), 12807170 (p=1.00e-03), 12422339 (p=1.00e-03), 11713122 (p=1.50e-03),
comorbidity AND asthma AND rhinitis	4	929	CD14	-	601	44	6.463e-51	17877764 (p=3.01e-04), 17919709 (p=3.04e-04), 11282774 (p=3.09e-04), 12580907 (p=3.09e-04), 16950285 (p=4.00e-04), 18417506 (p=4.01e-04), 16446545 (p=5.01e-04), 20109750 (p=5.01e-04), 14617510 (p=6.00e-04), 22697010 (p=6.01e-04),
comorbidity AND asthma AND rhinitis	5	80332	ADAM33	-	124	27	1.254e-48	15298558 (p=2.08e-04), 24751681 (p=1.40e-03), 15986064 (p=1.40e-03), 16024651 (p=1.50e-03), 16784537 (p=1.80e-03), 23245479 (p=1.90e-03), 23331525 (p=3.70e-03), 19996348 (p=3.90e-03), 15805180 (p=3.90e-03), 17339047 (p=3.90e-03),
comorbidity AND asthma AND rhinitis	6	3565	IL4	-	948	43	1.108e-41	24447084 (p=2.04e-04), 15087090 (p=2.05e-04), 11167377 (p=3.05e-04), 19254294 (p=3.07e-04), 16313681 (p=3.09e-04), 17209513 (p=5.02e-04), 19552791 (p=6.04e-04), 19735490 (p=6.04e-04), 15970635 (p=6.05e-04), 11980568 (p=1.40e-03),
comorbidity AND asthma AND rhinitis	7	85480	TSLP	-	178	24	9.295e-39	24525665 (p=3.01e-04), 23267211 (p=3.01e-04), 21820713 (p=6.07e-04), 18244952 (p=6.07e-04), 24397611 (p=8.00e-04), 22973903 (p=1.40e-03), 22036096 (p=1.40e-03), 24401911 (p=1.50e-03), 23817569 (p=1.51e-03), 22189594 (p=1.70e-03),
comorbidity AND asthma AND rhinitis	8	2206	MS4A2	-	98	20	3.538e-37	15087090 (p=2.05e-04), 11702205 (p=3.07e-04), 12047428 (p=5.02e-04), 11245344 (p=6.01e-04), 20085599 (p=6.08e-04), 17430357 (p=8.00e-04), 12422339 (p=1.00e-03), 17121586 (p=1.40e-03), 8805698 (p=1.50e-03), 16839402 (p=2.60e-03),
comorbidity AND asthma AND rhinitis	9	3566	IL4R	-	386	27	5.907e-35	20002627 (p=1.24e-04), 15737301 (p=3.01e-04), 16313681 (p=3.09e-04), 17209513 (p=5.02e-04), 11709756 (p=6.07e-04), 18849614 (p=6.07e-04), 12100043 (p=6.08e-04), 20085599 (p=6.08e-04), 12422339 (p=1.00e-03), 17121586 (p=1.40e-03),
comorbidity AND asthma AND rhinitis	10	94103	ORMDL3	-	64	15	5.935e-30	21843571 (p=6.08e-04), 19133921 (p=1.00e-03), 22017802 (p=1.50e-03), 23964555 (p=1.70e-03), 19175592 (p=2.00e-03), 22732088 (p=2.30e-03), 24649901 (p=3.70e-03), 20372189 (p=3.70e-03), 17611496 (p=3.70e-03), 20503266 (p=3.90e-03),
comorbidity AND asthma AND rhinitis	11	2950	GSTP1	-	1300	34	4.399e-28	18709160 (p=3.01e-04), 20210814 (p=5.01e-04), 14748821 (p=1.40e-03), 23622008 (p=1.50e-03), 20526719 (p=1.70e-03), 15544594 (p=1.70e-03), 16162701 (p=1.70e-03), 21051083 (p=2.00e-03), 20858151 (p=2.30e-03), 19032232 (p=3.20e-03),
comorbidity AND asthma AND rhinitis	12	7356	SCGB1A1	-	132	16	7.37e-27	15744536 (p=1.25e-04), 24735334 (p=2.07e-04), 19128353 (p=3.01e-04), 19222419 (p=1.40e-03), 21255142 (p=1.50e-03), 20736038 (p=1.50e-03), 15813809 (p=1.50e-03), 9643286 (p=1.51e-03), 18702901 (p=2.30e-03), 19076932 (p=2.60e-03),
comorbidity AND asthma AND rhinitis	13	6037	RNASE3	-	100	15	6.848e-27	21038779 (p=3.03e-04), 19133919 (p=3.03e-04), 20534163 (p=6.02e-04), 17362255 (p=6.04e-04), 23406588 (p=6.06e-04), 24814827 (p=1.50e-03), 23786280 (p=1.80e-03), 16874959 (p=2.00e-03), 18716399 (p=2.30e-03), 12100059 (p=2.30e-03),
comorbidity AND asthma AND rhinitis	14	387129	NPSR1	-	74	14	7.498e-27	15710598 (p=3.00e-04), 24439655 (p=3.03e-04), 25091462 (p=1.50e-03), 23372674 (p=1.50e-03), 18340359 (p=1.50e-03), 18305139 (p=1.50e-03), 19624525 (p=1.50e-03), 19996348 (p=3.90e-03), 18285428 (p=4.20e-03), 17703412 (p=4.50e-03),
comorbidity AND asthma AND rhinitis	15	3586	IL10	-	2305	39	1.398e-24	25562560 (p=1.21e-04), 24167151 (p=2.07e-04), 15007355 (p=3.09e-04), 18440625 (p=6.07e-04), 18534084 (p=1.40e-03), 14748015 (p=1.40e-03), 15120189 (p=1.50e-03), 20232770 (p=1.70e-03), 19383027 (p=1.80e-03), 16759385 (p=1.80e-03),
comorbidity AND asthma AND rhinitis	16	7124	TNF	-	4656	57	1.582e-24	18709160 (p=3.01e-04), 17450233 (p=3.09e-04), 20210814 (p=5.01e-04), 19196817 (p=6.06e-04), 20085599 (p=6.08e-04), 18385169 (p=1.40e-03), 18534084 (p=1.40e-03), 17686102 (p=1.50e-03), 15120189 (p=1.50e-03), 20194818 (p=1.50e-03),
comorbidity AND asthma AND rhinitis	17	10800	CYSLTR1	-	81	13	3.376e-24	16846449 (p=3.09e-04), 19733299 (p=4.00e-04), 12100046 (p=4.10e-03), 17703412 (p=4.50e-03), 16630147 (p=4.90e-03), 19080797 (p=5.10e-03), 17153879 (p=6.10e-03), 16776674 (p=8.30e-03), 23181793 (p=8.30e-03), 17924829 (p=8.30e-03),
comorbidity AND asthma AND rhinitis	18	2944	GSTM1	-	1869	33	7.9e-23	19860819 (p=3.08e-04), 22484660 (p=1.30e-03), 24559168 (p=1.40e-03), 16409207 (p=1.40e-03), 20526719 (p=1.70e-03), 16162701 (p=1.70e-03), 12186820 (p=2.00e-03), 21051083 (p=2.00e-03), 21176116 (p=2.00e-03), 19032232 (p=3.20e-03),
comorbidity AND asthma AND rhinitis	19	3567	IL5	-	200	15	2.313e-22	24875149 (p=2.04e-04), 15007355 (p=3.09e-04), 17362254 (p=6.01e-04), 18849614 (p=6.07e-04), 15805995 (p=8.00e-04), 22186238 (p=1.00e-03), 22541618 (p=1.50e-03), 24980230 (p=3.60e-03), 23957336 (p=3.80e-03), 17628972 (p=3.90e-03),
comorbidity AND asthma AND rhinitis	20	11005	SPINK5	-	66	11	4.657e-21	15005725 (p=6.00e-04), 20085599 (p=6.08e-04), 15986064 (p=1.40e-03), 14551605 (p=1.40e-03), 19534795 (p=1.50e-03), 22570283 (p=1.70e-03), 17989887 (p=3.70e-03), 11544479 (p=3.70e-03), 19996348 (p=3.90e-03), 20395963 (p=6.30e-03),
comorbidity AND asthma AND rhinitis	21	51131	PHF11	-	30	9	4.689e-20	20717939 (p=1.11e-04), 20085599 (p=6.08e-04), 19386584 (p=1.40e-03), 15674390 (p=3.90e-03), 19996348 (p=3.90e-03), 17703412 (p=4.50e-03), 12754510 (p=4.70e-03), 19247692 (p=6.80e-03), 17702965 (p=8.60e-03),
comorbidity AND asthma AND rhinitis	22	7099	TLR4	-	1682	28	4.937e-20	24524443 (p=2.02e-04), 17877764 (p=3.01e-04), 15007351 (p=3.02e-04), 18517079 (p=3.07e-04), 20109750 (p=5.01e-04), 20685742 (p=6.02e-04), 14735148 (p=6.03e-04), 21820713 (p=6.07e-04), 20085599 (p=6.08e-04), 16266379 (p=1.40e-03),
comorbidity AND asthma AND rhinitis	23	90865	IL33	-	228	14	6.248e-20	25746970 (p=3.06e-04), 22627366 (p=3.09e-04), 24568840 (p=6.06e-04), 23817569 (p=1.51e-03), 24122812 (p=1.51e-03), 22921786 (p=3.90e-03), 23759184 (p=3.90e-03), 20860503 (p=4.10e-03), 22349136 (p=5.10e-03), 24205920 (p=5.80e-03),
comorbidity AND asthma AND rhinitis	24	7097	TLR2	-	1071	23	6.653e-20	17877764 (p=3.01e-04), 15007351 (p=3.02e-04), 20685742 (p=6.02e-04), 20085599 (p=6.08e-04), 21134221 (p=6.08e-04), 21281869 (p=1.40e-03), 20109309 (p=1.40e-03), 16146574 (p=1.40e-03), 23821954 (p=1.50e-03), 20646366 (p=1.70e-03),
comorbidity AND asthma AND rhinitis	25	4056	LTC4S	-	87	11	9.477e-20	12589355 (p=1.50e-03), 19862937 (p=1.50e-03), 17063752 (p=3.70e-03), 19080797 (p=5.10e-03), 15131571 (p=5.30e-03), 22722751 (p=5.90e-03), 17153879 (p=6.10e-03), 20395963 (p=6.30e-03), 19247692 (p=6.80e-03), 17924829 (p=8.30e-03),
comorbidity AND asthma AND rhinitis	26	6352	CCL5	-	571	18	1.602e-19	11197694 (p=3.06e-04), 11544456 (p=6.01e-04), 19226274 (p=1.40e-03), 23180368 (p=1.40e-03), 12789231 (p=1.50e-03), 22444510 (p=1.50e-03), 17678722 (p=1.80e-03), 19099677 (p=2.30e-03), 22300682 (p=3.30e-03), 25645983 (p=3.70e-03),
comorbidity AND asthma AND rhinitis	27	6778	STAT6	-	259	14	3.185e-19	17121586 (p=1.40e-03), 22017802 (p=1.50e-03), 17883727 (p=1.80e-03), 18846228 (p=3.50e-03), 17703412 (p=4.50e-03), 15637551 (p=5.80e-03), 22075330 (p=6.00e-03), 20395963 (p=6.30e-03), 19247692 (p=6.80e-03), 23815671 (p=7.20e-03),
comorbidity AND asthma AND rhinitis	28	3578	IL9	-	102	10	5.316e-17	24468256 (p=2.30e-03), 16611254 (p=2.70e-03), 18349591 (p=3.20e-03), 17703412 (p=4.50e-03), 20861646 (p=4.70e-03), 17083349 (p=5.10e-03), 7666875 (p=5.50e-03), 25112699 (p=7.20e-03), 17517104 (p=8.30e-03), 21371865 (p=9.00e-03),
comorbidity AND asthma AND rhinitis	29	6356	CCL11	-	165	11	1.17e-16	23180368 (p=1.40e-03), 17845580 (p=1.51e-03), 25645983 (p=3.70e-03), 17703412 (p=4.50e-03), 20306659 (p=4.90e-03), 20704746 (p=5.60e-03), 22846146 (p=6.80e-03), 19247692 (p=6.80e-03), 22775568 (p=7.40e-03), 16461130 (p=7.70e-03),
comorbidity AND asthma AND rhinitis	30	2205	FCER1A	-	111	10	1.189e-16	17430357 (p=8.00e-04), 12897750 (p=1.51e-03), 22222815 (p=1.80e-03), 21209833 (p=2.50e-03), 18846228 (p=3.50e-03), 20028371 (p=4.50e-03), 17703412 (p=4.50e-03), 22075330 (p=6.00e-03), 21958156 (p=6.40e-03), 23725541 (p=9.00e-03),
comorbidity AND asthma AND rhinitis	31	55876	GSDMB	-	40	8	1.696e-16	19029000 (p=1.24e-04), 19133921 (p=1.00e-03), 24066901 (p=1.50e-03), 23817569 (p=1.51e-03), 22732088 (p=2.30e-03), 17611496 (p=3.70e-03), 20860503 (p=4.10e-03), 25256354 (p=7.40e-03),
comorbidity AND asthma AND rhinitis	32	6915	TBXA2R	-	134	10	7.695e-16	12000493 (p=6.00e-04), 15805995 (p=8.00e-04), 22017802 (p=1.50e-03), 18031559 (p=3.20e-03), 23517037 (p=4.90e-03), 20395963 (p=6.30e-03), 21734400 (p=6.30e-03), 19247692 (p=6.80e-03), 21070398 (p=7.80e-03), 17924829 (p=8.30e-03),
comorbidity AND asthma AND rhinitis	33	9173	IL1RL1	-	134	10	7.462e-16	20625511 (p=6.05e-04), 24568840 (p=6.06e-04), 23817569 (p=1.51e-03), 24122812 (p=1.51e-03), 23028483 (p=1.70e-03), 20503266 (p=3.90e-03), 20860503 (p=4.10e-03), 22233535 (p=6.80e-03), 19247692 (p=6.80e-03), 19254249 (p=7.40e-03),
comorbidity AND asthma AND rhinitis	34	3605	IL17A	-	744	16	2.188e-15	25562560 (p=1.21e-04), 24141678 (p=6.03e-04), 20437253 (p=6.04e-04), 21091665 (p=1.50e-03), 23957337 (p=1.50e-03), 25223230 (p=1.80e-03), 21980832 (p=1.80e-03), 19210369 (p=2.30e-03), 16207434 (p=2.40e-03), 19566585 (p=3.40e-03),
comorbidity AND asthma AND rhinitis	35	1232	CCR3	-	168	10	6.986e-15	20726325 (p=4.02e-04), 20220260 (p=6.03e-04), 11307756 (p=1.40e-03), 17845580 (p=1.51e-03), 17135764 (p=1.70e-03), 17703412 (p=4.50e-03), 20306659 (p=4.90e-03), 20144207 (p=5.90e-03), 19247692 (p=6.80e-03), 18379861 (p=9.10e-03),
comorbidity AND asthma AND rhinitis	36	7040	TGFB1	-	3084	29	7.132e-15	19096005 (p=3.09e-04), 17333284 (p=6.01e-04), 20085599 (p=6.08e-04), 19046298 (p=1.40e-03), 15120189 (p=1.50e-03), 19400903 (p=1.51e-03), 19940507 (p=1.70e-03), 23245944 (p=3.20e-03), 19043669 (p=3.20e-03), 23466425 (p=3.60e-03),
comorbidity AND asthma AND rhinitis	37	5729	PTGDR	-	70	8	1.699e-14	19220773 (p=1.40e-03), 12119603 (p=2.00e-03), 18797183 (p=3.90e-03), 19748656 (p=4.30e-03), 22182808 (p=5.40e-03), 21883277 (p=6.00e-03), 19247692 (p=6.80e-03), 23181793 (p=8.30e-03),
comorbidity AND asthma AND rhinitis	38	3458	IFNG	-	1525	20	2.285e-14	24167151 (p=2.07e-04), 15007355 (p=3.09e-04), 19552791 (p=6.04e-04), 19735490 (p=6.04e-04), 19639725 (p=1.00e-03), 22698804 (p=1.40e-03), 21798578 (p=1.50e-03), 15120189 (p=1.50e-03), 20194818 (p=1.50e-03), 24995662 (p=1.80e-03),
comorbidity AND asthma AND rhinitis	39	3606	IL18	-	758	15	3.433e-14	24167151 (p=2.07e-04), 16433859 (p=3.05e-04), 18093181 (p=1.40e-03), 22840759 (p=1.50e-03), 21448661 (p=1.50e-03), 20418295 (p=1.70e-03), 16759385 (p=1.80e-03), 24711060 (p=1.80e-03), 22686311 (p=2.00e-03), 15932380 (p=3.90e-03),
comorbidity AND asthma AND rhinitis	40	3568	IL5RA	-	80	8	4.782e-14	17362254 (p=6.01e-04), 25523412 (p=1.40e-03), 24332579 (p=1.40e-03), 20735756 (p=1.51e-03), 17703412 (p=4.50e-03), 19247692 (p=6.80e-03), 22560479 (p=7.40e-03), 23470716 (p=8.30e-03),
comorbidity AND asthma AND rhinitis	41	57628	DPP10	-	47	7	1.162e-13	25592153 (p=6.06e-04), 20085599 (p=6.08e-04), 15829243 (p=1.80e-03), 19996348 (p=3.90e-03), 17703412 (p=4.50e-03), 19247692 (p=6.80e-03), 17702965 (p=8.60e-03),
comorbidity AND asthma AND rhinitis	42	11251	PTGDR2	-	57	7	4.733e-13	21762224 (p=1.50e-03), 19392992 (p=1.50e-03), 17016057 (p=1.80e-03), 19290788 (p=2.00e-03), 22947041 (p=3.20e-03), 20491797 (p=6.60e-03), 19247692 (p=6.80e-03),
comorbidity AND asthma AND rhinitis	43	4049	LTA	-	521	12	1.082e-12	17450233 (p=3.09e-04), 11591192 (p=7.00e-04), 18385169 (p=1.40e-03), 22464751 (p=1.40e-03), 12169181 (p=1.70e-03), 21271873 (p=2.00e-03), 14987295 (p=3.90e-03), 17703412 (p=4.50e-03), 18947013 (p=6.00e-03), 20395963 (p=6.30e-03),
comorbidity AND asthma AND rhinitis	44	383	ARG1	-	122	8	1.392e-12	16387594 (p=5.00e-04), 20124949 (p=3.20e-03), 18478052 (p=3.90e-03), 19281908 (p=4.30e-03), 17703412 (p=4.50e-03), 18617639 (p=4.90e-03), 21039601 (p=8.30e-03), 25027824 (p=9.90e-03),
comorbidity AND asthma AND rhinitis	45	2952	GSTT1	-	1568	18	1.571e-12	22484660 (p=1.30e-03), 24559168 (p=1.40e-03), 16409207 (p=1.40e-03), 21051083 (p=2.00e-03), 19032232 (p=3.20e-03), 17497028 (p=3.90e-03), 14726165 (p=4.20e-03), 16030123 (p=5.20e-03), 17711870 (p=5.50e-03), 15300848 (p=5.90e-03),
comorbidity AND asthma AND rhinitis	46	3562	IL3	-	130	8	2.23e-12	17362254 (p=6.01e-04), 23978640 (p=6.02e-04), 24684517 (p=6.08e-04), 23953855 (p=1.50e-03), 17703412 (p=4.50e-03), 15372320 (p=5.90e-03), 19247692 (p=6.80e-03), 16785501 (p=9.00e-03),
comorbidity AND asthma AND rhinitis	47	1401	CRP	-	1534	17	7.698e-12	21801245 (p=3.05e-04), 22554299 (p=6.05e-04), 18219765 (p=1.50e-03), 19010993 (p=2.10e-03), 20219150 (p=2.40e-03), 22284830 (p=4.60e-03), 23684514 (p=4.70e-03), 17395501 (p=5.50e-03), 18704199 (p=6.30e-03), 22556030 (p=7.40e-03),
comorbidity AND asthma AND rhinitis	48	1116	CHI3L1	-	244	9	8.465e-12	20538957 (p=1.00e-03), 21530869 (p=1.30e-03), 19568425 (p=1.40e-03), 23397672 (p=1.70e-03), 24954373 (p=4.30e-03), 25056157 (p=4.50e-03), 25760838 (p=8.30e-03), 25592985 (p=8.60e-03), 23628340 (p=9.00e-03),
comorbidity AND asthma AND rhinitis	49	54106	TLR9	-	500	11	1.171e-11	20085599 (p=6.08e-04), 17000223 (p=1.40e-03), 19254290 (p=1.80e-03), 19096003 (p=2.00e-03), 24801457 (p=3.20e-03), 19639721 (p=3.60e-03), 18312481 (p=4.40e-03), 17703412 (p=4.50e-03), 21689850 (p=5.90e-03), 19247692 (p=6.80e-03),
comorbidity AND asthma AND rhinitis	50	3123	HLA-DRB1	-	2354	20	2.497e-11	19052351 (p=2.04e-04), 11378822 (p=6.03e-04), 16802776 (p=1.40e-03), 17212706 (p=1.40e-03), 17686102 (p=1.50e-03), 11167958 (p=1.50e-03), 15784113 (p=1.51e-03), 12169181 (p=1.70e-03), 12590981 (p=3.70e-03), 15853903 (p=5.20e-03),
comorbidity AND asthma AND rhinitis	51	1493	CTLA4	-	877	13	2.772e-11	16445777 (p=7.00e-04), 20016193 (p=1.40e-03), 21356099 (p=1.40e-03), 14720259 (p=1.51e-03), 12114354 (p=2.30e-03), 17703412 (p=4.50e-03), 19824886 (p=5.80e-03), 20395963 (p=6.30e-03), 19247692 (p=6.80e-03), 17456215 (p=8.20e-03),
comorbidity AND asthma AND rhinitis	52	6361	CCL17	-	107	7	3.626e-11	22017510 (p=1.30e-03), 14767451 (p=3.70e-03), 17703412 (p=4.50e-03), 22981793 (p=4.60e-03), 24628072 (p=5.50e-03), 22775568 (p=7.40e-03), 17517104 (p=8.30e-03),
comorbidity AND asthma AND rhinitis	53	3119	HLA-DQB1	-	1322	15	4.988e-11	19052351 (p=2.04e-04), 12890388 (p=6.07e-04), 15577839 (p=6.08e-04), 16802776 (p=1.40e-03), 17212706 (p=1.40e-03), 17686102 (p=1.50e-03), 15784113 (p=1.51e-03), 23817569 (p=1.51e-03), 20120618 (p=3.70e-03), 15853903 (p=5.20e-03),
comorbidity AND asthma AND rhinitis	54	4842	NOS1	-	311	9	6.469e-11	16238787 (p=6.07e-04), 12911502 (p=3.90e-03), 15080837 (p=4.30e-03), 17703412 (p=4.50e-03), 19603529 (p=6.00e-03), 20395963 (p=6.30e-03), 19247692 (p=6.80e-03), 17690329 (p=7.00e-03), 21039601 (p=8.30e-03),
comorbidity AND asthma AND rhinitis	55	50943	FOXP3	-	648	11	1.57e-10	19679154 (p=6.03e-04), 20028375 (p=1.50e-03), 21091665 (p=1.50e-03), 16551363 (p=3.70e-03), 20654176 (p=4.30e-03), 17703412 (p=4.50e-03), 20599261 (p=5.00e-03), 21107665 (p=5.90e-03), 20920773 (p=6.30e-03), 16091206 (p=7.70e-03),
comorbidity AND asthma AND rhinitis	56	30009	TBX21	-	146	7	3.037e-10	17949803 (p=6.00e-04), 16179640 (p=1.50e-03), 16874959 (p=2.00e-03), 22303482 (p=3.20e-03), 17703412 (p=4.50e-03), 19362357 (p=7.70e-03), 15806396 (p=9.50e-03),
comorbidity AND asthma AND rhinitis	57	27159	CHIA	-	33	5	5.73e-10	21303604 (p=7.00e-04), 20538957 (p=1.00e-03), 17703412 (p=4.50e-03), 19247692 (p=6.80e-03), 21511453 (p=9.40e-03),
comorbidity AND asthma AND rhinitis	58	6362	CCL18	-	85	6	6.989e-10	21539615 (p=1.70e-03), 15494534 (p=3.10e-03), 16670340 (p=3.20e-03), 17703412 (p=4.50e-03), 21943944 (p=4.70e-03), 23331560 (p=6.90e-03),
comorbidity AND asthma AND rhinitis	59	4210	MEFV	-	296	8	1.231e-09	17067442 (p=1.40e-03), 15643295 (p=3.80e-03), 19115056 (p=3.90e-03), 17469185 (p=4.40e-03), 24862656 (p=6.80e-03), 24071932 (p=6.80e-03), 14727457 (p=8.50e-03), 23356447 (p=9.00e-03),
comorbidity AND asthma AND rhinitis	60	4153	MBL2	-	641	10	1.986e-09	17014624 (p=6.04e-04), 22512728 (p=1.00e-03), 16178865 (p=1.40e-03), 20298391 (p=1.60e-03), 18700861 (p=1.80e-03), 17651383 (p=3.90e-03), 17703412 (p=4.50e-03), 25326706 (p=8.30e-03), 22225939 (p=8.40e-03), 17845414 (p=9.00e-03),
comorbidity AND asthma AND rhinitis	61	627	BDNF	-	1343	13	3.396e-09	21723144 (p=3.05e-04), 17584309 (p=6.02e-04), 19958603 (p=1.40e-03), 20874832 (p=1.50e-03), 23182421 (p=1.50e-03), 25649076 (p=1.70e-03), 19895626 (p=3.20e-03), 23245944 (p=3.20e-03), 19295238 (p=4.60e-03), 23899746 (p=6.00e-03),
comorbidity AND asthma AND rhinitis	62	56946	C11orf30	-	47	5	3.376e-09	22036096 (p=1.40e-03), 23886662 (p=1.50e-03), 23817569 (p=1.51e-03), 20503266 (p=3.90e-03), 25546184 (p=5.10e-03),
comorbidity AND asthma AND rhinitis	63	3553	IL1B	-	2138	16	3.594e-09	19096964 (p=1.50e-03), 21440944 (p=3.60e-03), 15974847 (p=3.90e-03), 23841472 (p=3.90e-03), 21421008 (p=3.90e-03), 17703412 (p=4.50e-03), 20564140 (p=4.90e-03), 18416756 (p=5.40e-03), 16520888 (p=5.90e-03), 24853301 (p=6.40e-03),
comorbidity AND asthma AND rhinitis	64	3603	IL16	-	120	6	5.167e-09	17703412 (p=4.50e-03), 17303923 (p=6.00e-03), 14657881 (p=7.20e-03), 15784111 (p=7.20e-03), 11714796 (p=7.70e-03), 16387589 (p=9.00e-03),
comorbidity AND asthma AND rhinitis	65	6369	CCL24	-	54	5	6.613e-09	16304252 (p=3.70e-03), 17703412 (p=4.50e-03), 24989688 (p=6.30e-03), 22846146 (p=6.80e-03), 19247692 (p=6.80e-03),
comorbidity AND asthma AND rhinitis	66	3576	CXCL8	-	1713	14	7.477e-09	20194818 (p=1.50e-03), 19496969 (p=1.50e-03), 16207434 (p=2.40e-03), 25114519 (p=2.40e-03), 17703412 (p=4.50e-03), 20564140 (p=4.90e-03), 24102466 (p=5.00e-03), 15356575 (p=5.00e-03), 18416756 (p=5.40e-03), 24853301 (p=6.40e-03),
comorbidity AND asthma AND rhinitis	67	10333	TLR6	-	129	6	7.638e-09	24445834 (p=4.00e-04), 16188043 (p=1.50e-03), 23817569 (p=1.51e-03), 19254290 (p=1.80e-03), 17703412 (p=4.50e-03), 19247692 (p=6.80e-03),
comorbidity AND asthma AND rhinitis	68	2625	GATA3	-	243	7	8.707e-09	18037162 (p=6.04e-04), 18410415 (p=1.50e-03), 23817569 (p=1.51e-03), 17628972 (p=3.90e-03), 17703412 (p=4.50e-03), 15637551 (p=5.80e-03), 19247692 (p=6.80e-03),
comorbidity AND asthma AND rhinitis	69	3952	LEP	-	1236	12	9.866e-09	24147569 (p=3.05e-04), 19725899 (p=3.07e-04), 18221467 (p=3.09e-04), 23648099 (p=1.70e-03), 19191138 (p=1.80e-03), 21721375 (p=3.90e-03), 25118115 (p=5.90e-03), 24164847 (p=7.00e-03), 22773729 (p=7.20e-03), 21631924 (p=7.70e-03),
comorbidity AND asthma AND rhinitis	70	6347	CCL2	-	1074	11	2.073e-08	15005768 (p=3.08e-04), 11544456 (p=6.01e-04), 23180368 (p=1.40e-03), 19496969 (p=1.50e-03), 22300682 (p=3.30e-03), 18615095 (p=3.70e-03), 17703412 (p=4.50e-03), 23454776 (p=5.10e-03), 22823210 (p=6.00e-03), 19247692 (p=6.80e-03),
comorbidity AND asthma AND rhinitis	71	3593	IL12B	-	436	8	2.072e-08	15007350 (p=3.08e-04), 15322986 (p=1.00e-03), 17703412 (p=4.50e-03), 20395963 (p=6.30e-03), 24654313 (p=6.40e-03), 15356557 (p=6.80e-03), 19247692 (p=6.80e-03), 12241719 (p=7.20e-03),
comorbidity AND asthma AND rhinitis	72	4843	NOS2	-	641	9	2.533e-08	16703578 (p=1.40e-03), 17177683 (p=1.70e-03), 22368302 (p=3.20e-03), 11692109 (p=4.30e-03), 17703412 (p=4.50e-03), 19247692 (p=6.80e-03), 21039601 (p=8.30e-03), 18774388 (p=8.70e-03), 18714530 (p=9.10e-03),
comorbidity AND asthma AND rhinitis	73	718	C3	-	458	8	2.942e-08	21801245 (p=3.05e-04), 18631248 (p=2.40e-03), 15278436 (p=3.70e-03), 17703412 (p=4.50e-03), 20395963 (p=6.30e-03), 19247692 (p=6.80e-03), 18566738 (p=7.70e-03), 16355111 (p=9.70e-03),
comorbidity AND asthma AND rhinitis	74	348	APOE	-	3542	19	3.278e-08	21276236 (p=1.50e-03), 21790705 (p=3.60e-03), 15526312 (p=3.90e-03), 15611352 (p=3.90e-03), 21763789 (p=3.90e-03), 23567388 (p=4.30e-03), 18243212 (p=4.90e-03), 19054180 (p=5.00e-03), 22863665 (p=6.00e-03), 18289451 (p=6.20e-03),
comorbidity AND asthma AND rhinitis	75	81793	TLR10	-	77	5	3.532e-08	23817569 (p=1.51e-03), 19254290 (p=1.80e-03), 15201134 (p=2.30e-03), 17703412 (p=4.50e-03), 19247692 (p=6.80e-03),
comorbidity AND asthma AND rhinitis	76	10392	NOD1	-	172	6	3.785e-08	16918516 (p=3.01e-04), 15990792 (p=1.50e-03), 20395963 (p=6.30e-03), 19247692 (p=6.80e-03), 15718249 (p=8.50e-03), 24661094 (p=9.80e-03),
comorbidity AND asthma AND rhinitis	77	2615	LRRC32	-	25	4	3.792e-08	22036096 (p=1.40e-03), 23886662 (p=1.50e-03), 23817569 (p=1.51e-03), 21907864 (p=5.70e-03),
comorbidity AND asthma AND rhinitis	78	64127	NOD2	-	753	9	9.055e-08	12704363 (p=2.03e-04), 16008671 (p=1.40e-03), 17703412 (p=4.50e-03), 19247692 (p=6.80e-03), 19826411 (p=7.40e-03), 19479837 (p=8.40e-03), 21206965 (p=8.80e-03), 18088053 (p=8.80e-03), 20024904 (p=9.10e-03),
comorbidity AND asthma AND rhinitis	79	3552	IL1A	-	793	9	1.377e-07	12752325 (p=6.02e-04), 12209090 (p=3.20e-03), 15974847 (p=3.90e-03), 17703412 (p=4.50e-03), 18416756 (p=5.40e-03), 17638785 (p=6.80e-03), 19247692 (p=6.80e-03), 19431193 (p=9.40e-03), 23527710 (p=9.90e-03),
comorbidity AND asthma AND rhinitis	80	1234	CCR5	-	1345	11	1.632e-07	12612298 (p=6.01e-04), 21465943 (p=6.03e-04), 20220260 (p=6.03e-04), 12023175 (p=1.40e-03), 18972295 (p=1.70e-03), 17135764 (p=1.70e-03), 17703412 (p=4.50e-03), 23454776 (p=5.10e-03), 25891238 (p=5.10e-03), 19247692 (p=6.80e-03),
comorbidity AND asthma AND rhinitis	81	3142	HLX	-	36	4	1.67e-07	19295429 (p=3.20e-03), 22303482 (p=3.20e-03), 19038437 (p=4.20e-03), 19362357 (p=7.70e-03),
comorbidity AND asthma AND rhinitis	82	4846	NOS3	-	1647	12	1.658e-07	16238787 (p=6.07e-04), 18486767 (p=1.50e-03), 20955262 (p=2.60e-03), 22368302 (p=3.20e-03), 19968769 (p=4.20e-03), 22304542 (p=5.00e-03), 16520888 (p=5.90e-03), 19603529 (p=6.00e-03), 19247692 (p=6.80e-03), 17690329 (p=7.00e-03),
comorbidity AND asthma AND rhinitis	83	240	ALOX5	-	231	6	2e-07	16364163 (p=1.40e-03), 23600541 (p=4.20e-03), 17703412 (p=4.50e-03), 19247692 (p=6.80e-03), 17924829 (p=8.30e-03), 19524426 (p=9.60e-03),
comorbidity AND asthma AND rhinitis	84	3659	IRF1	-	242	6	2.6e-07	18079498 (p=6.06e-04), 19295429 (p=3.20e-03), 17703412 (p=4.50e-03), 19247692 (p=6.80e-03), 11069564 (p=7.80e-03), 19463200 (p=9.10e-03),
comorbidity AND asthma AND rhinitis	85	729230	CCR2	-	415	7	2.684e-07	19082218 (p=3.02e-04), 20220260 (p=6.03e-04), 17135764 (p=1.70e-03), 18615095 (p=3.70e-03), 17703412 (p=4.50e-03), 23454776 (p=5.10e-03), 19055601 (p=7.40e-03),
comorbidity AND asthma AND rhinitis	86	4589	MUC7	-	41	4	2.698e-07	17703412 (p=4.50e-03), 19247692 (p=6.80e-03), 19820409 (p=7.60e-03), 11378823 (p=9.50e-03),
comorbidity AND asthma AND rhinitis	87	64806	IL25	-	42	4	2.947e-07	23957336 (p=3.80e-03), 20492545 (p=6.40e-03), 24247484 (p=8.20e-03), 25273095 (p=9.10e-03),
comorbidity AND asthma AND rhinitis	88	9415	FADS2	-	121	5	2.953e-07	21793953 (p=6.00e-04), 16670158 (p=4.90e-03), 22629455 (p=6.30e-03), 24934276 (p=6.40e-03), 20045144 (p=9.40e-03),
comorbidity AND asthma AND rhinitis	89	3581	IL9R	-	46	4	4.19e-07	10329852 (p=4.20e-03), 17703412 (p=4.50e-03), 17083349 (p=5.10e-03), 21371865 (p=9.00e-03),
comorbidity AND asthma AND rhinitis	90	4524	MTHFR	-	2871	15	4.48e-07	18070159 (p=1.07e-04), 20456312 (p=2.05e-04), 20298385 (p=5.00e-04), 23692062 (p=1.50e-03), 14727014 (p=6.10e-03), 20088379 (p=6.80e-03), 19466593 (p=6.80e-03), 19247692 (p=6.80e-03), 25598270 (p=6.90e-03), 20213658 (p=7.20e-03),
comorbidity AND asthma AND rhinitis	91	5265	SERPINA1	-	457	7	4.794e-07	22912729 (p=1.40e-03), 20298391 (p=1.60e-03), 22414631 (p=1.70e-03), 17659342 (p=6.30e-03), 12612303 (p=6.90e-03), 22971141 (p=9.00e-03), 17203708 (p=9.10e-03),
comorbidity AND asthma AND rhinitis	92	2207	FCER1G	-	49	4	5.256e-07	17430357 (p=8.00e-04), 11980568 (p=1.40e-03), 20028371 (p=4.50e-03), 12836193 (p=4.70e-03),
comorbidity AND asthma AND rhinitis	93	3597	IL13RA1	-	49	4	5.199e-07	17392323 (p=4.20e-03), 17703412 (p=4.50e-03), 12522691 (p=4.60e-03), 21425907 (p=5.50e-03),
comorbidity AND asthma AND rhinitis	94	7422	VEGFA	-	3387	16	7.367e-07	24152156 (p=6.05e-04), 22791116 (p=1.40e-03), 17651148 (p=1.40e-03), 19196819 (p=1.80e-03), 18702899 (p=2.00e-03), 22461367 (p=2.60e-03), 18298425 (p=3.90e-03), 24717944 (p=3.90e-03), 19663127 (p=4.90e-03), 24102466 (p=5.00e-03),
comorbidity AND asthma AND rhinitis	95	6036	RNASE2	-	55	4	8.169e-07	21680952 (p=2.01e-04), 24814827 (p=1.50e-03), 17641730 (p=2.30e-03), 15356558 (p=2.80e-03),
comorbidity AND asthma AND rhinitis	96	3176	HNMT	-	57	4	9.355e-07	19025430 (p=2.07e-04), 17651147 (p=1.50e-03), 17703412 (p=4.50e-03), 19247692 (p=6.80e-03),
comorbidity AND asthma AND rhinitis	97	256076	COL6A5	-	12	3	1.055e-06	21353297 (p=5.00e-04), 17850181 (p=1.50e-03), 24348519 (p=3.20e-03),
comorbidity AND asthma AND rhinitis	98	384	ARG2	-	59	4	1.055e-06	16387594 (p=5.00e-04), 20124949 (p=3.20e-03), 19281908 (p=4.30e-03), 21039601 (p=8.30e-03),
comorbidity AND asthma AND rhinitis	99	3600	IL15	-	344	6	1.733e-06	16333313 (p=6.03e-04), 16629787 (p=1.40e-03), 17703412 (p=4.50e-03), 15131572 (p=4.90e-03), 19247692 (p=6.80e-03), 19133918 (p=9.50e-03),
comorbidity AND asthma AND rhinitis	100	5054	SERPINE1	-	1115	9	1.769e-06	22361338 (p=3.10e-04), 19063817 (p=6.03e-04), 21530867 (p=1.40e-03), 21478212 (p=1.50e-03), 22578058 (p=1.80e-03), 16409202 (p=2.40e-03), 17063752 (p=3.70e-03), 16789641 (p=6.80e-03), 19247692 (p=6.80e-03),
comorbidity AND asthma AND rhinitis	101	1636	ACE	-	2167	12	2.08e-06	19484664 (p=3.09e-04), 22361338 (p=3.10e-04), 21889830 (p=6.01e-04), 17014625 (p=6.07e-04), 12899394 (p=2.00e-03), 11776522 (p=4.70e-03), 19247692 (p=6.80e-03), 22741763 (p=7.20e-03), 23609427 (p=7.80e-03), 18727619 (p=8.20e-03),
comorbidity AND asthma AND rhinitis	102	3557	IL1RN	-	869	8	2.586e-06	17107994 (p=3.90e-03), 17703412 (p=4.50e-03), 16409203 (p=4.70e-03), 20564140 (p=4.90e-03), 19247692 (p=6.80e-03), 23014359 (p=7.20e-03), 16549749 (p=7.50e-03), 19431193 (p=9.40e-03),
comorbidity AND asthma AND rhinitis	103	10344	CCL26	-	75	4	2.659e-06	21303604 (p=7.00e-04), 17703412 (p=4.50e-03), 24989688 (p=6.30e-03), 22846146 (p=6.80e-03),
comorbidity AND asthma AND rhinitis	104	10	NAT2	-	607	7	2.766e-06	23622008 (p=1.50e-03), 16533241 (p=3.90e-03), 16886893 (p=4.20e-03), 19608015 (p=4.90e-03), 12492617 (p=5.80e-03), 20088379 (p=6.80e-03), 19247692 (p=6.80e-03),
comorbidity AND asthma AND rhinitis	105	1080	CFTR	-	1261	9	4.5e-06	15781764 (p=3.07e-04), 20298391 (p=1.60e-03), 12881616 (p=5.50e-03), 24568560 (p=6.40e-03), 19247692 (p=6.80e-03), 11243954 (p=7.70e-03), 15486385 (p=7.70e-03), 24583165 (p=8.20e-03), 23378603 (p=9.00e-03),
comorbidity AND asthma AND rhinitis	106	5097	PCDH1	-	20	3	4.986e-06	23050600 (p=2.00e-03), 23988763 (p=2.80e-03), 21929597 (p=9.00e-03),
comorbidity AND asthma AND rhinitis	107	1906	EDN1	-	669	7	5.09e-06	11991554 (p=1.50e-03), 11831453 (p=1.70e-03), 19730395 (p=4.00e-03), 17703412 (p=4.50e-03), 18260253 (p=4.90e-03), 19247692 (p=6.80e-03), 18580062 (p=8.80e-03),
comorbidity AND asthma AND rhinitis	108	4318	MMP9	-	2011	11	5.187e-06	22237587 (p=3.04e-04), 22391064 (p=3.05e-04), 20181264 (p=1.40e-03), 21819758 (p=1.50e-03), 19958602 (p=1.70e-03), 20305574 (p=4.30e-03), 18391843 (p=4.70e-03), 23639553 (p=4.90e-03), 17572998 (p=5.30e-03), 19940022 (p=6.00e-03),
comorbidity AND asthma AND rhinitis	109	9370	ADIPOQ	-	1655	10	5.571e-06	18442802 (p=3.05e-04), 24147569 (p=3.05e-04), 19725899 (p=3.07e-04), 18221467 (p=3.09e-04), 20188864 (p=1.00e-03), 20593932 (p=3.50e-03), 19236311 (p=4.30e-03), 15292348 (p=6.40e-03), 17119002 (p=6.70e-03), 18650840 (p=7.20e-03),
comorbidity AND asthma AND rhinitis	110	1215	CMA1	-	100	4	7.94e-06	15248847 (p=4.02e-04), 20736038 (p=1.50e-03), 18973102 (p=3.20e-03), 16134991 (p=9.60e-03),
comorbidity AND asthma AND rhinitis	111	6532	SLC6A4	-	1797	10	1.094e-05	23947391 (p=6.08e-04), 25297871 (p=5.10e-03), 16679343 (p=5.50e-03), 23663729 (p=6.80e-03), 20868372 (p=7.70e-03), 23394411 (p=7.80e-03), 20368500 (p=8.20e-03), 19154632 (p=8.30e-03), 17460615 (p=8.30e-03), 16972224 (p=8.80e-03),
comorbidity AND asthma AND rhinitis	112	335	APOA1	-	774	7	1.254e-05	19218819 (p=6.03e-04), 22674204 (p=1.40e-03), 23889245 (p=1.70e-03), 23786280 (p=1.80e-03), 21115733 (p=5.90e-03), 14567398 (p=6.80e-03), 12011770 (p=8.70e-03),
comorbidity AND asthma AND rhinitis	113	51135	IRAK4	-	117	4	1.45e-05	22932140 (p=1.40e-03), 21738793 (p=1.80e-03), 19254290 (p=1.80e-03), 17703412 (p=4.50e-03),
comorbidity AND asthma AND rhinitis	114	241	ALOX5AP	-	122	4	1.698e-05	18547289 (p=1.40e-03), 22537113 (p=1.70e-03), 22206291 (p=9.10e-03), 19524426 (p=9.60e-03),
comorbidity AND asthma AND rhinitis	115	29851	ICOS	-	124	4	1.796e-05	19175887 (p=1.22e-04), 21356099 (p=1.40e-03), 19824886 (p=5.80e-03), 19247692 (p=6.80e-03),
comorbidity AND asthma AND rhinitis	116	8288	EPX	-	31	3	1.789e-05	24814827 (p=1.50e-03), 10971470 (p=4.30e-03), 14657871 (p=6.90e-03),
comorbidity AND asthma AND rhinitis	117	26762	HAVCR1	-	128	4	2.003e-05	15007635 (p=6.06e-04), 17703412 (p=4.50e-03), 19247692 (p=6.80e-03), 14637143 (p=7.20e-03),
comorbidity AND asthma AND rhinitis	118	3992	FADS1	-	129	4	2.049e-05	21793953 (p=6.00e-04), 16670158 (p=4.90e-03), 22629455 (p=6.30e-03), 20045144 (p=9.40e-03),
comorbidity AND asthma AND rhinitis	119	55540	IL17RB	-	33	3	2.115e-05	21252617 (p=7.40e-03), 21473777 (p=8.00e-03), 24247484 (p=8.20e-03),
comorbidity AND asthma AND rhinitis	120	2908	NR3C1	-	853	7	2.188e-05	22469783 (p=1.40e-03), 21113676 (p=2.70e-03), 18952539 (p=3.10e-03), 17703412 (p=4.50e-03), 20488636 (p=4.90e-03), 17407502 (p=6.90e-03), 25748343 (p=9.10e-03),
comorbidity AND asthma AND rhinitis	121	10631	POSTN	-	140	4	2.768e-05	25037608 (p=7.00e-04), 25060295 (p=1.50e-03), 23791506 (p=1.51e-03), 22918213 (p=2.00e-03),
comorbidity AND asthma AND rhinitis	122	3075	CFH	-	614	6	3.885e-05	18164066 (p=6.00e-03), 25880396 (p=6.30e-03), 18704199 (p=6.30e-03), 23070659 (p=6.40e-03), 18538409 (p=7.40e-03), 20605213 (p=9.00e-03),
comorbidity AND asthma AND rhinitis	123	10850	CCL27	-	41	3	3.987e-05	22017510 (p=1.30e-03), 14767451 (p=3.70e-03), 17703412 (p=4.50e-03),
comorbidity AND asthma AND rhinitis	124	3135	HLA-G	-	626	6	4.264e-05	24736882 (p=1.70e-03), 20487636 (p=4.20e-03), 22075330 (p=6.00e-03), 19247692 (p=6.80e-03), 17702965 (p=8.60e-03), 19410660 (p=9.00e-03),
comorbidity AND asthma AND rhinitis	125	653509	SFTPA1	-	160	4	4.555e-05	16884531 (p=1.51e-03), 22384248 (p=5.80e-03), 17407567 (p=6.40e-03), 20963503 (p=7.40e-03),
comorbidity AND asthma AND rhinitis	126	7096	TLR1	-	163	4	4.863e-05	24445834 (p=4.00e-04), 23817569 (p=1.51e-03), 19254290 (p=1.80e-03), 17703412 (p=4.50e-03),
comorbidity AND asthma AND rhinitis	127	101	ADAM8	-	47	3	5.86e-05	17339047 (p=3.90e-03), 23670189 (p=4.70e-03), 18682798 (p=5.50e-03),
comorbidity AND asthma AND rhinitis	128	57105	CYSLTR2	-	48	3	6.198e-05	18946233 (p=3.50e-03), 12100046 (p=4.10e-03), 19247692 (p=6.80e-03),
comorbidity AND asthma AND rhinitis	129	5743	PTGS2	-	1832	9	6.532e-05	22416915 (p=6.06e-04), 22464751 (p=1.40e-03), 16024651 (p=1.50e-03), 17573729 (p=2.30e-03), 18489027 (p=3.70e-03), 17703412 (p=4.50e-03), 15544595 (p=6.00e-03), 17924829 (p=8.30e-03), 22929917 (p=9.50e-03),
comorbidity AND asthma AND rhinitis	130	1138	CHRNA5	-	178	4	6.676e-05	22017462 (p=3.03e-04), 22837378 (p=2.30e-03), 19300482 (p=9.00e-03), 19436041 (p=9.50e-03),
comorbidity AND asthma AND rhinitis	131	1136	CHRNA3	-	182	4	7.233e-05	22017462 (p=3.03e-04), 22837378 (p=2.30e-03), 20007924 (p=8.30e-03), 19300482 (p=9.00e-03),
comorbidity AND asthma AND rhinitis	132	26191	PTPN22	-	408	5	7.735e-05	17579671 (p=5.80e-03), 17553139 (p=8.70e-03), 19248096 (p=8.80e-03), 15943829 (p=9.10e-03), 20560812 (p=9.90e-03),
comorbidity AND asthma AND rhinitis	133	727	C5	-	186	4	7.763e-05	20143644 (p=1.16e-04), 15278436 (p=3.70e-03), 17703412 (p=4.50e-03), 19247692 (p=6.80e-03),
comorbidity AND asthma AND rhinitis	134	56729	RETN	-	410	5	7.801e-05	18221467 (p=3.09e-04), 23648099 (p=1.70e-03), 20093199 (p=5.30e-03), 23685419 (p=7.70e-03), 22886618 (p=7.70e-03),
comorbidity AND asthma AND rhinitis	135	3117	HLA-DQA1	-	717	6	8.364e-05	19052351 (p=2.04e-04), 12890388 (p=6.07e-04), 23817569 (p=1.51e-03), 15853903 (p=5.20e-03), 19858318 (p=5.50e-03), 11953202 (p=9.00e-03),
comorbidity AND asthma AND rhinitis	136	6346	CCL1	-	54	3	8.348e-05	17845580 (p=1.51e-03), 17703412 (p=4.50e-03), 15814739 (p=4.90e-03),
comorbidity AND asthma AND rhinitis	137	6441	SFTPD	-	191	4	8.367e-05	16426259 (p=1.51e-03), 18355911 (p=2.40e-03), 17703412 (p=4.50e-03), 19493231 (p=9.70e-03),
comorbidity AND asthma AND rhinitis	138	6890	TAP1	-	208	4	0.0001162	11591192 (p=7.00e-04), 17703412 (p=4.50e-03), 19247692 (p=6.80e-03), 21796142 (p=7.40e-03),
comorbidity AND asthma AND rhinitis	139	1241	LTB4R	-	61	3	0.0001182	18797182 (p=1.70e-03), 23167751 (p=7.80e-03), 22206291 (p=9.10e-03),
comorbidity AND asthma AND rhinitis	140	3077	HFE	-	798	6	0.0001459	16102632 (p=3.90e-03), 11812557 (p=3.90e-03), 23188073 (p=6.80e-03), 20145272 (p=7.40e-03), 14752836 (p=7.60e-03), 12427496 (p=7.70e-03),
comorbidity AND asthma AND rhinitis	141	51297	BPIFA1	-	68	3	0.0001618	24512783 (p=6.02e-04), 23644997 (p=5.50e-03), 19650845 (p=5.50e-03),
comorbidity AND asthma AND rhinitis	142	6774	STAT3	-	1670	8	0.0001866	24898675 (p=3.02e-04), 24184145 (p=9.00e-04), 18841165 (p=3.90e-03), 17703412 (p=4.50e-03), 15935090 (p=4.60e-03), 20816194 (p=6.80e-03), 21624746 (p=7.80e-03), 20483734 (p=8.40e-03),
comorbidity AND asthma AND rhinitis	143	79068	FTO	-	505	5	0.0001975	21182554 (p=1.51e-03), 24348519 (p=3.20e-03), 21443588 (p=5.20e-03), 19255736 (p=5.80e-03), 25110886 (p=8.20e-03),
comorbidity AND asthma AND rhinitis	144	8809	IL18R1	-	73	3	0.0001963	23028483 (p=1.70e-03), 20860503 (p=4.10e-03), 17703412 (p=4.50e-03),
comorbidity AND asthma AND rhinitis	145	7177	TPSAB1	-	80	3	0.0002569	24054365 (p=3.06e-04), 24372627 (p=6.07e-04), 23018683 (p=4.90e-03),
comorbidity AND asthma AND rhinitis	146	3569	IL6	-	3314	11	0.0002771	16344268 (p=3.05e-04), 15120189 (p=1.50e-03), 16759385 (p=1.80e-03), 25114519 (p=2.40e-03), 17703412 (p=4.50e-03), 20564140 (p=4.90e-03), 20599261 (p=5.00e-03), 15696921 (p=5.30e-03), 17431659 (p=6.80e-03), 19936367 (p=7.70e-03),
comorbidity AND asthma AND rhinitis	147	4803	NGF	-	264	4	0.0002775	19076929 (p=6.07e-04), 19958603 (p=1.40e-03), 17703412 (p=4.50e-03), 10806167 (p=9.90e-03),
comorbidity AND asthma AND rhinitis	148	3146	HMGB1	-	559	5	0.0003083	24152844 (p=4.02e-04), 21380479 (p=6.02e-04), 25639490 (p=6.07e-04), 22333024 (p=1.50e-03), 26250770 (p=3.20e-03),
comorbidity AND asthma AND rhinitis	149	83852	SETDB2	-	10	2	0.0003516	20085599 (p=6.08e-04), 12754510 (p=4.70e-03),
comorbidity AND asthma AND rhinitis	150	1118	CHIT1	-	92	3	0.0003779	20538957 (p=1.00e-03), 17693102 (p=1.80e-03), 23331560 (p=6.90e-03),
comorbidity AND asthma AND rhinitis	151	6367	CCL22	-	92	3	0.0003754	23106659 (p=6.02e-04), 17703412 (p=4.50e-03), 17517104 (p=8.30e-03),
comorbidity AND asthma AND rhinitis	152	3594	IL12RB1	-	93	3	0.0003852	17703412 (p=4.50e-03), 21689850 (p=5.90e-03), 19247692 (p=6.80e-03),
comorbidity AND asthma AND rhinitis	153	136227	COL26A1	-	11	2	0.0004184	21086123 (p=2.60e-03), 22217332 (p=3.70e-03),
comorbidity AND asthma AND rhinitis	154	7421	VDR	-	1435	7	0.0004355	15282200 (p=3.20e-03), 17703412 (p=4.50e-03), 24885630 (p=5.80e-03), 19996341 (p=6.30e-03), 19247692 (p=6.80e-03), 17211561 (p=7.40e-03), 12588283 (p=9.50e-03),
comorbidity AND asthma AND rhinitis	155	4160	MC4R	-	324	4	0.0005829	16507637 (p=1.50e-03), 24348519 (p=3.20e-03), 16032553 (p=4.60e-03), 19255736 (p=5.80e-03),
comorbidity AND asthma AND rhinitis	156	7292	TNFSF4	-	111	3	0.0006371	21820713 (p=6.07e-04), 21781408 (p=1.80e-03), 18060034 (p=9.00e-03),
comorbidity AND asthma AND rhinitis	157	6095	RORA	-	115	3	0.0007037	24142618 (p=9.00e-04), 22424883 (p=3.20e-03), 20860503 (p=4.10e-03),
comorbidity AND asthma AND rhinitis	158	2208	FCER2	-	118	3	0.0007551	21958076 (p=1.50e-03), 17703412 (p=4.50e-03), 21307287 (p=6.80e-03),
comorbidity AND asthma AND rhinitis	159	3558	IL2	-	692	5	0.0007783	16333313 (p=6.03e-04), 22036096 (p=1.40e-03), 17703412 (p=4.50e-03), 20599261 (p=5.00e-03), 23998235 (p=7.00e-03),
comorbidity AND asthma AND rhinitis	160	7049	TGFBR3	-	120	3	0.000784	20386084 (p=1.00e-03), 18315732 (p=6.90e-03), 19131638 (p=8.70e-03),
comorbidity AND asthma AND rhinitis	161	55054	ATG16L1	-	129	3	0.0009664	21206965 (p=8.80e-03), 18088053 (p=8.80e-03), 20024904 (p=9.10e-03),
comorbidity AND asthma AND rhinitis	162	7046	TGFBR1	-	381	4	0.001042	14597484 (p=4.20e-03), 18711258 (p=4.30e-03), 17703412 (p=4.50e-03), 20599261 (p=5.00e-03),
comorbidity AND asthma AND rhinitis	163	6696	SPP1	-	741	5	0.001042	16433860 (p=1.70e-03), 23578778 (p=1.70e-03), 23098767 (p=2.30e-03), 20553297 (p=7.20e-03), 18178454 (p=8.70e-03),
comorbidity AND asthma AND rhinitis	164	3560	IL2RB	-	138	3	0.001159	20860503 (p=4.10e-03), 17703412 (p=4.50e-03), 18774388 (p=8.70e-03),
comorbidity AND asthma AND rhinitis	165	5734	PTGER4	-	146	3	0.001363	23817569 (p=1.51e-03), 17877755 (p=3.90e-03), 18797183 (p=3.90e-03),
comorbidity AND asthma AND rhinitis	166	51311	TLR8	-	146	3	0.001355	22857391 (p=1.50e-03), 17703412 (p=4.50e-03), 18682521 (p=8.20e-03),
comorbidity AND asthma AND rhinitis	167	123688	HYKK	-	21	2	0.001459	22837378 (p=2.30e-03), 19300482 (p=9.00e-03),
comorbidity AND asthma AND rhinitis	168	131566	DCBLD2	-	22	2	0.001595	22468095 (p=1.50e-03), 22261696 (p=4.20e-03),
comorbidity AND asthma AND rhinitis	169	246	ALOX15	-	159	3	0.001713	22652554 (p=1.00e-03), 23181793 (p=8.30e-03), 18774388 (p=8.70e-03),
comorbidity AND asthma AND rhinitis	170	114781	BTBD9	-	23	2	0.001727	24993631 (p=8.80e-03), 25142570 (p=9.10e-03),
comorbidity AND asthma AND rhinitis	171	1672	DEFB1	-	160	3	0.001724	16435024 (p=1.00e-03), 22059360 (p=1.50e-03), 15696078 (p=1.70e-03),
comorbidity AND asthma AND rhinitis	172	2289	FKBP5	-	160	3	0.001714	23762334 (p=3.20e-03), 18349090 (p=6.70e-03), 24411633 (p=7.50e-03),
comorbidity AND asthma AND rhinitis	173	7098	TLR3	-	447	4	0.001797	16146574 (p=1.40e-03), 19254290 (p=1.80e-03), 17703412 (p=4.50e-03), 19752565 (p=9.10e-03),
comorbidity AND asthma AND rhinitis	174	117156	SCGB3A2	-	24	2	0.00184	21410962 (p=1.80e-03), 19247692 (p=6.80e-03),
comorbidity AND asthma AND rhinitis	175	1728	NQO1	-	466	4	0.002081	20526719 (p=1.70e-03), 16520888 (p=5.90e-03), 19027876 (p=6.30e-03), 23840148 (p=9.80e-03),
comorbidity AND asthma AND rhinitis	176	5144	PDE4D	-	175	3	0.002183	24142618 (p=9.00e-04), 21876611 (p=1.50e-03), 20503266 (p=3.90e-03),
comorbidity AND asthma AND rhinitis	177	6775	STAT4	-	187	3	0.00264	15744455 (p=2.40e-03), 17703412 (p=4.50e-03), 15637551 (p=5.80e-03),
comorbidity AND asthma AND rhinitis	178	1178	CLC	-	30	2	0.00283	19650845 (p=5.50e-03), 16457599 (p=9.10e-03),
comorbidity AND asthma AND rhinitis	179	2638	GC	-	195	3	0.002954	14987123 (p=2.00e-03), 24447085 (p=4.00e-03), 22673963 (p=8.20e-03),
comorbidity AND asthma AND rhinitis	180	91937	TIMD4	-	31	2	0.002991	24204099 (p=7.40e-03), 19392790 (p=9.10e-03),
comorbidity AND asthma AND rhinitis	181	10111	RAD50	-	198	3	0.003055	23886662 (p=1.50e-03), 18846228 (p=3.50e-03), 21734400 (p=6.30e-03),
comorbidity AND asthma AND rhinitis	182	3383	ICAM1	-	975	5	0.003256	17598660 (p=6.06e-04), 17703412 (p=4.50e-03), 15696921 (p=5.30e-03), 24393359 (p=5.50e-03), 25003170 (p=6.00e-03),
comorbidity AND asthma AND rhinitis	183	1394	CRHR1	-	209	3	0.003543	22748421 (p=4.30e-03), 19247692 (p=6.80e-03), 19210659 (p=7.40e-03),
comorbidity AND asthma AND rhinitis	184	56477	CCL28	-	35	2	0.00374	19659860 (p=1.80e-03), 17703412 (p=4.50e-03),
comorbidity AND asthma AND rhinitis	185	51284	TLR7	-	216	3	0.00386	22857391 (p=1.50e-03), 17703412 (p=4.50e-03), 18682521 (p=8.20e-03),
comorbidity AND asthma AND rhinitis	186	9690	UBE3C	-	36	2	0.003916	21881582 (p=1.50e-03), 20934631 (p=9.50e-03),
comorbidity AND asthma AND rhinitis	187	1815	DRD4	-	562	4	0.003953	14560322 (p=2.40e-03), 15843770 (p=7.40e-03), 23127570 (p=9.00e-03), 17406960 (p=9.20e-03),
comorbidity AND asthma AND rhinitis	188	4586	MUC5AC	-	237	3	0.004985	17703412 (p=4.50e-03), 24102466 (p=5.00e-03), 20639461 (p=7.40e-03),
comorbidity AND asthma AND rhinitis	189	6368	CCL23	-	41	2	0.00501	17703412 (p=4.50e-03), 21497884 (p=7.40e-03),
comorbidity AND asthma AND rhinitis	190	1524	CX3CR1	-	241	3	0.00518	18615095 (p=3.70e-03), 14657873 (p=4.40e-03), 23414540 (p=8.80e-03),
comorbidity AND asthma AND rhinitis	191	5791	PTPRE	-	42	2	0.005204	18682798 (p=5.50e-03), 21734400 (p=6.30e-03),
comorbidity AND asthma AND rhinitis	192	3122	HLA-DRA	-	244	3	0.005315	23028483 (p=1.70e-03), 22391069 (p=2.70e-03), 19247692 (p=6.80e-03),
comorbidity AND asthma AND rhinitis	193	7442	TRPV1	-	246	3	0.005415	19877503 (p=6.03e-04), 22443337 (p=1.40e-03), 20639579 (p=1.70e-03),
comorbidity AND asthma AND rhinitis	194	3554	IL1R1	-	257	3	0.006121	21281963 (p=6.07e-04), 17703412 (p=4.50e-03), 19431193 (p=9.40e-03),
comorbidity AND asthma AND rhinitis	195	719	C3AR1	-	46	2	0.006121	15278436 (p=3.70e-03), 19247692 (p=6.80e-03),
comorbidity AND asthma AND rhinitis	196	1437	CSF2	-	261	3	0.006337	17362254 (p=6.01e-04), 17703412 (p=4.50e-03), 19247692 (p=6.80e-03),
comorbidity AND asthma AND rhinitis	197	3067	HDC	-	48	2	0.0066	17703412 (p=4.50e-03), 20608921 (p=7.50e-03),
comorbidity AND asthma AND rhinitis	198	50615	IL21R	-	48	2	0.006566	23817569 (p=1.51e-03), 25007029 (p=7.80e-03),
comorbidity AND asthma AND rhinitis	199	149233	IL23R	-	267	3	0.00667	17703412 (p=4.50e-03), 21206965 (p=8.80e-03), 20024904 (p=9.10e-03),
comorbidity AND asthma AND rhinitis	200	8490	RGS5	-	50	2	0.007056	23193110 (p=1.40e-03), 21278382 (p=7.00e-03),
comorbidity AND asthma AND rhinitis	201	81704	DOCK8	-	50	2	0.007021	24898675 (p=3.02e-04), 21931011 (p=7.80e-03),
comorbidity AND asthma AND rhinitis	202	962	CD48	-	53	2	0.007852	25255823 (p=9.00e-03), 16785501 (p=9.00e-03),
comorbidity AND asthma AND rhinitis	203	5027	P2RX7	-	287	3	0.008068	22743305 (p=3.08e-04), 23144325 (p=1.50e-03), 19201928 (p=7.20e-03),
comorbidity AND asthma AND rhinitis	204	3240	HP	-	290	3	0.008275	23268292 (p=2.40e-03), 25493023 (p=5.40e-03), 18258668 (p=9.90e-03),
comorbidity AND asthma AND rhinitis	205	3570	IL6R	-	291	3	0.008317	17703412 (p=4.50e-03), 20599261 (p=5.00e-03), 21907864 (p=5.70e-03),
comorbidity AND asthma AND rhinitis	206	11213	IRAK3	-	55	2	0.008293	17503328 (p=1.80e-03), 19013233 (p=6.30e-03),
comorbidity AND asthma AND rhinitis	207	22806	IKZF3	-	56	2	0.008557	23817569 (p=1.51e-03), 22626592 (p=1.80e-03),
comorbidity AND asthma AND rhinitis	208	847	CAT	-	295	3	0.008529	24824229 (p=4.20e-03), 19373626 (p=6.30e-03), 21829032 (p=9.90e-03),
comorbidity AND asthma AND rhinitis	209	3779	KCNMB1	-	57	2	0.00878	19295429 (p=3.20e-03), 18535015 (p=3.90e-03),
comorbidity AND asthma AND rhinitis	210	345611	IRGM	-	57	2	0.008738	22228152 (p=5.50e-03), 20024904 (p=9.10e-03),
comorbidity AND asthma AND rhinitis	211	6355	CCL8	-	59	2	0.00932	21945122 (p=3.10e-03), 17703412 (p=4.50e-03),
comorbidity AND asthma AND rhinitis	212	940	CD28	-	308	3	0.009487	21356099 (p=1.40e-03), 17703412 (p=4.50e-03), 19824886 (p=5.80e-03),
comorbidity AND asthma AND rhinitis	213	114548	NLRP3	-	309	3	0.009525	21421008 (p=3.90e-03), 17178985 (p=6.80e-03), 22935299 (p=7.70e-03),
comorbidity AND asthma AND rhinitis	214	23765	IL17RA	-	60	2	0.009498	17703412 (p=4.50e-03), 24247484 (p=8.20e-03),
comorbidity AND asthma AND rhinitis	215	3592	IL12A	-	312	3	0.009707	18671862 (p=2.06e-04), 17703412 (p=4.50e-03), 15356557 (p=6.80e-03),
comorbidity AND asthma AND rhinitis	216	119391	GSTO2	-	61	2	0.009735	24471578 (p=2.20e-03), 22040239 (p=6.00e-03),
comorbidity AND asthma AND rhinitis	217	125	ADH1B	-	316	3	0.009976	20357489 (p=2.08e-04), 23806636 (p=5.02e-04), 16520888 (p=5.90e-03),
comorbidity AND rhinitis AND (eczema OR "atopic dermatitis")	1	2312	FLG	-	211	90	6.629e-150	19589816 (p=1.08e-04), 23078034 (p=1.10e-04), 25174864 (p=3.01e-04), 18313126 (p=3.02e-04), 21365004 (p=3.04e-04), 19348926 (p=3.04e-04), 18396323 (p=3.05e-04), 25277085 (p=4.01e-04), 22030464 (p=4.02e-04), 25528737 (p=4.05e-04),
comorbidity AND rhinitis AND (eczema OR "atopic dermatitis")	2	3596	IL13	-	505	72	1.218e-86	22846750 (p=2.02e-04), 18417506 (p=3.07e-04), 22023794 (p=4.00e-04), 20085599 (p=4.08e-04), 22013915 (p=4.08e-04), 15007355 (p=4.11e-04), 20975284 (p=4.12e-04), 24447084 (p=4.14e-04), 16272823 (p=4.15e-04), 19254294 (p=4.17e-04),
comorbidity AND rhinitis AND (eczema OR "atopic dermatitis")	3	929	CD14	-	601	56	3.847e-61	18417506 (p=3.07e-04), 17877764 (p=4.01e-04), 20085599 (p=4.08e-04), 16446545 (p=4.08e-04), 20109750 (p=4.09e-04), 11282774 (p=4.12e-04), 17919709 (p=4.13e-04), 16950285 (p=4.13e-04), 12580907 (p=4.13e-04), 23194293 (p=4.14e-04),
comorbidity AND rhinitis AND (eczema OR "atopic dermatitis")	4	3566	IL4R	-	386	48	1.456e-60	20002627 (p=4.01e-04), 15737301 (p=4.04e-04), 23480403 (p=4.07e-04), 20085599 (p=4.08e-04), 12100043 (p=4.17e-04), 17121586 (p=4.18e-04), 17209513 (p=5.00e-04), 12422339 (p=5.01e-04), 16313681 (p=5.03e-04), 11709756 (p=6.00e-04),
comorbidity AND rhinitis AND (eczema OR "atopic dermatitis")	5	80332	ADAM33	-	124	31	1.305e-52	15298558 (p=4.18e-04), 16784537 (p=5.04e-04), 15986064 (p=5.05e-04), 22349453 (p=6.00e-04), 16024651 (p=1.50e-03), 24751681 (p=1.60e-03), 18560587 (p=1.60e-03), 22871616 (p=1.70e-03), 16519819 (p=1.80e-03), 19996348 (p=2.30e-03),
comorbidity AND rhinitis AND (eczema OR "atopic dermatitis")	6	3565	IL4	-	948	54	1.097e-48	15087090 (p=4.12e-04), 11167377 (p=4.13e-04), 24447084 (p=4.14e-04), 22884982 (p=4.15e-04), 19254294 (p=4.17e-04), 17121586 (p=4.18e-04), 17209513 (p=5.00e-04), 19552791 (p=5.00e-04), 15970635 (p=5.02e-04), 16313681 (p=5.03e-04),
comorbidity AND rhinitis AND (eczema OR "atopic dermatitis")	7	2206	MS4A2	-	98	27	4.771e-48	20085599 (p=4.08e-04), 15087090 (p=4.12e-04), 17121586 (p=4.18e-04), 11245344 (p=4.18e-04), 12422339 (p=5.01e-04), 8805698 (p=5.01e-04), 11702205 (p=5.03e-04), 17430357 (p=6.02e-04), 12047428 (p=1.50e-03), 20028371 (p=1.60e-03),
comorbidity AND rhinitis AND (eczema OR "atopic dermatitis")	8	154	ADRB2	-	885	44	1.275e-39	18709160 (p=4.06e-04), 20210814 (p=4.17e-04), 12422339 (p=5.01e-04), 15170877 (p=6.04e-04), 24691493 (p=6.06e-04), 16935688 (p=6.07e-04), 25074500 (p=7.03e-04), 18849614 (p=1.20e-03), 15248848 (p=1.20e-03), 19254291 (p=1.20e-03),
comorbidity AND rhinitis AND (eczema OR "atopic dermatitis")	9	1815	DRD4	-	562	37	3.305e-39	14560322 (p=1.20e-03), 18188752 (p=2.40e-03), 24391992 (p=2.40e-03), 22051710 (p=3.00e-03), 15843770 (p=3.40e-03), 16389711 (p=3.40e-03), 16493876 (p=3.50e-03), 20006992 (p=3.90e-03), 19017022 (p=4.00e-03), 18563476 (p=4.00e-03),
comorbidity AND rhinitis AND (eczema OR "atopic dermatitis")	10	94103	ORMDL3	-	64	17	2.235e-31	19133921 (p=5.00e-04), 22017802 (p=1.50e-03), 21843571 (p=1.60e-03), 24649901 (p=1.60e-03), 20503266 (p=1.60e-03), 17611496 (p=1.80e-03), 20372189 (p=1.80e-03), 19175592 (p=1.80e-03), 22732088 (p=2.30e-03), 20860503 (p=2.30e-03),
comorbidity AND rhinitis AND (eczema OR "atopic dermatitis")	11	6531	SLC6A3	-	654	32	4.608e-31	17485610 (p=7.04e-04), 23215821 (p=1.50e-03), 16389200 (p=1.50e-03), 23076524 (p=1.80e-03), 18188752 (p=2.40e-03), 9837830 (p=3.10e-03), 16389711 (p=3.40e-03), 20006992 (p=3.90e-03), 18206700 (p=4.00e-03), 16741944 (p=4.10e-03),
comorbidity AND rhinitis AND (eczema OR "atopic dermatitis")	12	2950	GSTP1	-	1300	39	1.402e-28	18709160 (p=4.06e-04), 15544594 (p=4.10e-04), 20210814 (p=4.17e-04), 20674822 (p=6.04e-04), 16162701 (p=6.04e-04), 14748821 (p=1.30e-03), 21051083 (p=1.50e-03), 23330922 (p=1.60e-03), 17711870 (p=1.60e-03), 23622008 (p=1.60e-03),
comorbidity AND rhinitis AND (eczema OR "atopic dermatitis")	13	387129	NPSR1	-	74	16	3.75e-28	15710598 (p=3.05e-04), 24439655 (p=4.07e-04), 25091462 (p=6.00e-04), 18340359 (p=6.07e-04), 18305139 (p=7.02e-04), 23372674 (p=9.00e-04), 19624525 (p=1.40e-03), 19996348 (p=2.30e-03), 18285428 (p=2.40e-03), 17703412 (p=2.60e-03),
comorbidity AND rhinitis AND (eczema OR "atopic dermatitis")	14	2944	GSTM1	-	1869	45	6.192e-28	19860819 (p=4.17e-04), 20674822 (p=6.04e-04), 16162701 (p=6.04e-04), 22484660 (p=6.05e-04), 21176116 (p=7.03e-04), 24559168 (p=7.03e-04), 16409207 (p=1.00e-03), 25328891 (p=1.10e-03), 21051083 (p=1.50e-03), 17711870 (p=1.60e-03),
comorbidity AND rhinitis AND (eczema OR "atopic dermatitis")	15	6778	STAT6	-	259	21	9.449e-27	17121586 (p=4.18e-04), 18846228 (p=7.03e-04), 22017802 (p=1.50e-03), 23815671 (p=1.50e-03), 17883727 (p=1.60e-03), 17703412 (p=2.60e-03), 22075330 (p=2.60e-03), 9392697 (p=2.70e-03), 15637551 (p=2.80e-03), 20395963 (p=3.10e-03),
comorbidity AND rhinitis AND (eczema OR "atopic dermatitis")	16	7124	TNF	-	4656	68	2.792e-25	18709160 (p=4.06e-04), 20085599 (p=4.08e-04), 15137526 (p=4.12e-04), 17450233 (p=4.14e-04), 20210814 (p=4.17e-04), 19196817 (p=6.04e-04), 17686102 (p=6.08e-04), 18385169 (p=7.04e-04), 21271873 (p=9.01e-04), 20736038 (p=1.00e-03),
comorbidity AND rhinitis AND (eczema OR "atopic dermatitis")	17	85480	TSLP	-	178	18	3.49e-25	24525665 (p=4.12e-04), 24397611 (p=4.17e-04), 22036096 (p=5.02e-04), 23267211 (p=5.04e-04), 18244952 (p=6.01e-04), 22973903 (p=7.01e-04), 24401911 (p=7.03e-04), 21820713 (p=9.01e-04), 20444170 (p=1.40e-03), 21689850 (p=1.60e-03),
comorbidity AND rhinitis AND (eczema OR "atopic dermatitis")	18	6532	SLC6A4	-	1797	38	2.988e-23	23947391 (p=7.02e-04), 16679343 (p=1.50e-03), 20868372 (p=1.60e-03), 16972224 (p=1.80e-03), 18188752 (p=2.40e-03), 19154632 (p=3.30e-03), 16389711 (p=3.40e-03), 12658617 (p=3.70e-03), 23663729 (p=3.90e-03), 15318027 (p=3.90e-03),
comorbidity AND rhinitis AND (eczema OR "atopic dermatitis")	19	11005	SPINK5	-	66	13	1.008e-22	20085599 (p=4.08e-04), 15005725 (p=4.09e-04), 14551605 (p=5.01e-04), 15986064 (p=5.05e-04), 19534795 (p=6.07e-04), 17989887 (p=1.60e-03), 16519819 (p=1.80e-03), 11544479 (p=1.80e-03), 19996348 (p=2.30e-03), 20395963 (p=3.10e-03),
comorbidity AND rhinitis AND (eczema OR "atopic dermatitis")	20	3586	IL10	-	2305	42	1.144e-22	25562560 (p=2.07e-04), 24167151 (p=3.06e-04), 15007355 (p=4.11e-04), 18440625 (p=6.00e-04), 14748015 (p=6.07e-04), 20232770 (p=7.03e-04), 18534084 (p=1.00e-03), 16759385 (p=1.20e-03), 15120189 (p=1.60e-03), 16551363 (p=1.80e-03),
comorbidity AND rhinitis AND (eczema OR "atopic dermatitis")	21	3119	HLA-DQB1	-	1322	32	2.29e-22	19052351 (p=4.03e-04), 16802776 (p=6.00e-04), 17212706 (p=6.01e-04), 12890388 (p=6.01e-04), 17686102 (p=6.08e-04), 15784113 (p=1.20e-03), 15853903 (p=2.40e-03), 22281000 (p=3.30e-03), 23443026 (p=3.40e-03), 20120618 (p=3.90e-03),
comorbidity AND rhinitis AND (eczema OR "atopic dermatitis")	22	7356	SCGB1A1	-	132	15	3.034e-22	19128353 (p=4.01e-04), 15744536 (p=4.05e-04), 24735334 (p=4.13e-04), 19222419 (p=6.07e-04), 9643286 (p=7.02e-04), 20736038 (p=1.00e-03), 21255142 (p=1.50e-03), 17703412 (p=2.60e-03), 20395963 (p=3.10e-03), 17716718 (p=3.90e-03),
comorbidity AND rhinitis AND (eczema OR "atopic dermatitis")	23	7099	TLR4	-	1682	35	6.801e-22	17877764 (p=4.01e-04), 18517079 (p=4.06e-04), 24524443 (p=4.06e-04), 15007351 (p=4.07e-04), 20085599 (p=4.08e-04), 20109750 (p=4.09e-04), 20685742 (p=4.18e-04), 14735148 (p=6.04e-04), 20646366 (p=6.07e-04), 23821954 (p=7.02e-04),
comorbidity AND rhinitis AND (eczema OR "atopic dermatitis")	24	4210	MEFV	-	296	18	2.582e-21	17067442 (p=7.00e-04), 15643295 (p=1.50e-03), 19115056 (p=2.50e-03), 24862656 (p=2.60e-03), 17469185 (p=2.60e-03), 24071932 (p=4.10e-03), 14727457 (p=4.80e-03), 23592051 (p=5.00e-03), 23356447 (p=5.20e-03), 18353061 (p=5.50e-03),
comorbidity AND rhinitis AND (eczema OR "atopic dermatitis")	25	7097	TLR2	-	1071	26	2.627e-19	17877764 (p=4.01e-04), 15007351 (p=4.07e-04), 20085599 (p=4.08e-04), 20685742 (p=4.18e-04), 21134221 (p=5.03e-04), 21281869 (p=6.01e-04), 20646366 (p=6.07e-04), 23821954 (p=7.02e-04), 18312481 (p=1.20e-03), 19096003 (p=1.50e-03),
comorbidity AND rhinitis AND (eczema OR "atopic dermatitis")	26	348	APOE	-	3542	45	1.844e-18	21276236 (p=7.03e-04), 20697334 (p=2.40e-03), 15526312 (p=2.50e-03), 15611352 (p=2.70e-03), 18289451 (p=3.00e-03), 21550086 (p=3.00e-03), 18728174 (p=3.10e-03), 19054180 (p=3.10e-03), 17911363 (p=3.30e-03), 18243212 (p=3.50e-03),
comorbidity AND rhinitis AND (eczema OR "atopic dermatitis")	27	2952	GSTT1	-	1568	29	5.433e-18	22484660 (p=6.05e-04), 24559168 (p=7.03e-04), 16409207 (p=1.00e-03), 21051083 (p=1.50e-03), 17711870 (p=1.60e-03), 17937745 (p=2.60e-03), 17497028 (p=2.60e-03), 15531593 (p=3.50e-03), 16030123 (p=4.20e-03), 18057098 (p=4.40e-03),
comorbidity AND rhinitis AND (eczema OR "atopic dermatitis")	28	51131	PHF11	-	30	9	6.988e-18	20717939 (p=2.02e-04), 20085599 (p=4.08e-04), 19386584 (p=7.01e-04), 15674390 (p=1.60e-03), 12754510 (p=1.60e-03), 19996348 (p=2.30e-03), 17703412 (p=2.60e-03), 17702965 (p=3.30e-03), 19247692 (p=4.80e-03),
comorbidity AND rhinitis AND (eczema OR "atopic dermatitis")	29	64127	NOD2	-	753	21	1.366e-17	12704363 (p=3.01e-04), 16008671 (p=6.05e-04), 16519819 (p=1.80e-03), 17703412 (p=2.60e-03), 19479837 (p=4.00e-03), 20024904 (p=4.00e-03), 17301648 (p=4.40e-03), 19843337 (p=4.80e-03), 19247692 (p=4.80e-03), 17156146 (p=4.90e-03),
comorbidity AND rhinitis AND (eczema OR "atopic dermatitis")	30	55876	GSDMB	-	40	9	1.23e-16	19029000 (p=2.06e-04), 19133921 (p=5.00e-04), 24066901 (p=7.01e-04), 17611496 (p=1.80e-03), 22732088 (p=2.30e-03), 20860503 (p=2.30e-03), 25256354 (p=4.10e-03), 23817569 (p=6.20e-03), 24315451 (p=8.60e-03),
comorbidity AND rhinitis AND (eczema OR "atopic dermatitis")	31	627	BDNF	-	1343	25	2.762e-16	21723144 (p=4.06e-04), 17584309 (p=6.03e-04), 19895626 (p=6.07e-04), 18179783 (p=1.30e-03), 25649076 (p=1.50e-03), 20874832 (p=1.80e-03), 23182421 (p=3.50e-03), 25425456 (p=3.90e-03), 20006992 (p=3.90e-03), 19603419 (p=4.30e-03),
comorbidity AND rhinitis AND (eczema OR "atopic dermatitis")	32	3123	HLA-DRB1	-	2354	31	3.408e-15	19052351 (p=4.03e-04), 16802776 (p=6.00e-04), 17212706 (p=6.01e-04), 11378822 (p=6.05e-04), 17686102 (p=6.08e-04), 15784113 (p=1.20e-03), 12169181 (p=1.50e-03), 11167958 (p=1.50e-03), 12508396 (p=1.80e-03), 24962747 (p=2.10e-03),
comorbidity AND rhinitis AND (eczema OR "atopic dermatitis")	33	3567	IL5	-	200	12	7.769e-15	24875149 (p=3.04e-04), 15007355 (p=4.11e-04), 17362254 (p=4.11e-04), 22186238 (p=7.02e-04), 18849614 (p=1.20e-03), 15805995 (p=1.60e-03), 17703412 (p=2.60e-03), 22541618 (p=2.60e-03), 18996999 (p=4.20e-03), 20636896 (p=4.50e-03),
comorbidity AND rhinitis AND (eczema OR "atopic dermatitis")	34	4049	LTA	-	521	16	9.68e-15	17450233 (p=4.14e-04), 11591192 (p=6.03e-04), 18385169 (p=7.04e-04), 21271873 (p=9.01e-04), 22464751 (p=1.40e-03), 12169181 (p=1.50e-03), 17703412 (p=2.60e-03), 20395963 (p=3.10e-03), 17014622 (p=4.00e-03), 14987295 (p=4.10e-03),
comorbidity AND rhinitis AND (eczema OR "atopic dermatitis")	35	2205	FCER1A	-	111	10	2.683e-14	22222815 (p=5.01e-04), 17430357 (p=6.02e-04), 18846228 (p=7.03e-04), 23725541 (p=1.20e-03), 12897750 (p=1.40e-03), 21209833 (p=1.60e-03), 20028371 (p=1.60e-03), 17703412 (p=2.60e-03), 22075330 (p=2.60e-03), 21958156 (p=2.70e-03),
comorbidity AND rhinitis AND (eczema OR "atopic dermatitis")	36	54106	TLR9	-	500	15	8.051e-14	20085599 (p=4.08e-04), 18312481 (p=1.20e-03), 19096003 (p=1.50e-03), 21689850 (p=1.60e-03), 19639721 (p=1.60e-03), 17703412 (p=2.60e-03), 17000223 (p=2.60e-03), 19254290 (p=4.30e-03), 19627277 (p=4.50e-03), 19247692 (p=4.80e-03),
comorbidity AND rhinitis AND (eczema OR "atopic dermatitis")	37	4524	MTHFR	-	2871	32	8.459e-14	18070159 (p=1.06e-04), 20456312 (p=4.04e-04), 20298385 (p=4.16e-04), 23692062 (p=6.04e-04), 19466593 (p=2.60e-03), 25598270 (p=3.30e-03), 14727014 (p=4.00e-03), 20213658 (p=4.10e-03), 12042168 (p=4.60e-03), 21731042 (p=4.80e-03),
comorbidity AND rhinitis AND (eczema OR "atopic dermatitis")	38	10800	CYSLTR1	-	81	9	8.768e-14	19733299 (p=4.08e-04), 16846449 (p=4.14e-04), 17703412 (p=2.60e-03), 17558309 (p=3.50e-03), 23181793 (p=4.00e-03), 19080797 (p=5.00e-03), 16776674 (p=5.50e-03), 17153879 (p=5.70e-03), 19524426 (p=8.60e-03),
comorbidity AND rhinitis AND (eczema OR "atopic dermatitis")	39	79068	FTO	-	505	15	8.563e-14	21443588 (p=1.10e-03), 21182554 (p=1.60e-03), 19255736 (p=1.80e-03), 24348519 (p=2.30e-03), 25110886 (p=3.40e-03), 20418190 (p=3.50e-03), 24040077 (p=4.10e-03), 20598163 (p=4.80e-03), 19153581 (p=4.90e-03), 25184161 (p=5.00e-03),
comorbidity AND rhinitis AND (eczema OR "atopic dermatitis")	40	3458	IFNG	-	1525	23	1.329e-13	24167151 (p=3.06e-04), 15007355 (p=4.11e-04), 19552791 (p=5.00e-04), 19735490 (p=5.04e-04), 21798578 (p=6.00e-04), 19639725 (p=6.07e-04), 22698804 (p=1.00e-03), 24995662 (p=1.60e-03), 20194818 (p=1.60e-03), 15120189 (p=1.60e-03),
comorbidity AND rhinitis AND (eczema OR "atopic dermatitis")	41	9173	IL1RL1	-	134	10	1.567e-13	24568840 (p=5.00e-04), 20503266 (p=1.60e-03), 23028483 (p=2.10e-03), 20860503 (p=2.30e-03), 19247692 (p=4.80e-03), 23817571 (p=5.00e-03), 23817569 (p=6.20e-03), 20625511 (p=7.70e-03), 19852851 (p=8.10e-03), 19910030 (p=9.50e-03),
comorbidity AND rhinitis AND (eczema OR "atopic dermatitis")	42	6352	CCL5	-	571	15	4.547e-13	23180368 (p=6.03e-04), 11197694 (p=6.04e-04), 11544456 (p=6.05e-04), 22444510 (p=1.60e-03), 12789231 (p=2.30e-03), 17703412 (p=2.60e-03), 19099677 (p=2.70e-03), 17678722 (p=2.80e-03), 20395963 (p=3.10e-03), 15592421 (p=3.50e-03),
comorbidity AND rhinitis AND (eczema OR "atopic dermatitis")	43	6037	RNASE3	-	100	9	5.505e-13	19133919 (p=4.18e-04), 17362255 (p=6.04e-04), 21038779 (p=9.01e-04), 20534163 (p=1.20e-03), 23406588 (p=1.60e-03), 12100059 (p=4.10e-03), 24814827 (p=4.20e-03), 16874959 (p=6.70e-03), 14630983 (p=8.80e-03),
comorbidity AND rhinitis AND (eczema OR "atopic dermatitis")	44	3606	IL18	-	758	16	2.045e-12	24167151 (p=3.06e-04), 16433859 (p=4.04e-04), 18093181 (p=6.01e-04), 21448661 (p=6.05e-04), 20418295 (p=7.03e-04), 22840759 (p=9.00e-04), 16759385 (p=1.20e-03), 24711060 (p=1.80e-03), 22686311 (p=2.30e-03), 17703412 (p=2.60e-03),
comorbidity AND rhinitis AND (eczema OR "atopic dermatitis")	45	9415	FADS2	-	121	9	3.039e-12	21793953 (p=4.12e-04), 22629455 (p=1.60e-03), 16670158 (p=2.60e-03), 20045144 (p=4.70e-03), 18937842 (p=5.30e-03), 24934276 (p=7.10e-03), 18626191 (p=7.70e-03), 23667444 (p=8.20e-03), 20948998 (p=8.50e-03),
comorbidity AND rhinitis AND (eczema OR "atopic dermatitis")	46	57628	DPP10	-	47	7	1.011e-11	20085599 (p=4.08e-04), 15829243 (p=7.00e-04), 19996348 (p=2.30e-03), 17703412 (p=2.60e-03), 17702965 (p=3.30e-03), 19247692 (p=4.80e-03), 19910030 (p=9.50e-03),
comorbidity AND rhinitis AND (eczema OR "atopic dermatitis")	47	1636	ACE	-	2167	24	1.816e-11	22361338 (p=4.10e-04), 19484664 (p=5.01e-04), 21889830 (p=6.02e-04), 17014625 (p=7.01e-04), 16769256 (p=3.10e-03), 22741763 (p=3.80e-03), 17032288 (p=4.10e-03), 23846034 (p=4.40e-03), 19247692 (p=4.80e-03), 17333108 (p=6.10e-03),
comorbidity AND rhinitis AND (eczema OR "atopic dermatitis")	48	90865	IL33	-	228	10	2.749e-11	24568840 (p=5.00e-04), 22627366 (p=5.01e-04), 25746970 (p=5.02e-04), 20860503 (p=2.30e-03), 23472165 (p=5.00e-03), 22921786 (p=5.40e-03), 23817569 (p=6.20e-03), 22329990 (p=7.70e-03), 22349136 (p=9.30e-03), 23759184 (p=9.60e-03),
comorbidity AND rhinitis AND (eczema OR "atopic dermatitis")	49	3578	IL9	-	102	8	4.005e-11	16611254 (p=1.60e-03), 17703412 (p=2.60e-03), 17083349 (p=2.60e-03), 24468256 (p=4.30e-03), 21371865 (p=4.40e-03), 7666875 (p=4.40e-03), 18349591 (p=8.80e-03), 20861646 (p=9.70e-03),
comorbidity AND rhinitis AND (eczema OR "atopic dermatitis")	50	1312	COMT	-	1432	19	5.754e-11	16679343 (p=1.50e-03), 12627475 (p=1.50e-03), 20868372 (p=1.60e-03), 21135332 (p=1.60e-03), 16275815 (p=2.70e-03), 22416031 (p=3.10e-03), 17636223 (p=3.80e-03), 22972758 (p=4.00e-03), 19946720 (p=4.10e-03), 21501166 (p=4.70e-03),
comorbidity AND rhinitis AND (eczema OR "atopic dermatitis")	51	7040	TGFB1	-	3084	28	6.114e-11	20085599 (p=4.08e-04), 19096005 (p=5.01e-04), 17333284 (p=5.01e-04), 15120189 (p=1.60e-03), 19046298 (p=2.10e-03), 17703412 (p=2.60e-03), 20599261 (p=3.00e-03), 20395963 (p=3.10e-03), 25119113 (p=3.90e-03), 18711258 (p=4.10e-03),
comorbidity AND rhinitis AND (eczema OR "atopic dermatitis")	52	1621	DBH	-	171	9	6.056e-11	16389711 (p=3.40e-03), 20006992 (p=3.90e-03), 18030083 (p=4.00e-03), 16741944 (p=4.10e-03), 23692268 (p=4.50e-03), 15796803 (p=6.10e-03), 16616989 (p=8.80e-03), 22841130 (p=9.30e-03), 18982239 (p=9.50e-03),
comorbidity AND rhinitis AND (eczema OR "atopic dermatitis")	53	3117	HLA-DQA1	-	717	14	9.938e-11	19052351 (p=4.03e-04), 12890388 (p=6.01e-04), 15853903 (p=2.40e-03), 19895409 (p=4.00e-03), 19858318 (p=5.00e-03), 23817571 (p=5.00e-03), 11953202 (p=5.10e-03), 18585974 (p=5.60e-03), 23817569 (p=6.20e-03), 16540751 (p=7.20e-03),
comorbidity AND rhinitis AND (eczema OR "atopic dermatitis")	54	3605	IL17A	-	744	14	1.569e-10	25562560 (p=2.07e-04), 20437253 (p=6.02e-04), 24141678 (p=1.30e-03), 19210369 (p=1.60e-03), 25223230 (p=1.70e-03), 17703412 (p=2.60e-03), 21245272 (p=4.00e-03), 21980832 (p=4.10e-03), 23957337 (p=6.30e-03), 22507625 (p=6.70e-03),
comorbidity AND rhinitis AND (eczema OR "atopic dermatitis")	55	5729	PTGDR	-	70	7	1.571e-10	19220773 (p=7.03e-04), 12119603 (p=1.50e-03), 23181793 (p=4.00e-03), 19247692 (p=4.80e-03), 22182808 (p=5.00e-03), 19748656 (p=7.40e-03), 21199159 (p=8.80e-03),
comorbidity AND rhinitis AND (eczema OR "atopic dermatitis")	56	26762	HAVCR1	-	128	8	2.214e-10	15007635 (p=4.14e-04), 17703412 (p=2.60e-03), 14637143 (p=3.30e-03), 16940744 (p=3.40e-03), 19247692 (p=4.80e-03), 22857392 (p=5.20e-03), 20232767 (p=6.40e-03), 15867855 (p=6.90e-03),
comorbidity AND rhinitis AND (eczema OR "atopic dermatitis")	57	3952	LEP	-	1236	17	2.398e-10	19725899 (p=4.15e-04), 18221467 (p=4.18e-04), 24147569 (p=6.02e-04), 19191138 (p=1.60e-03), 23648099 (p=1.60e-03), 23561045 (p=1.70e-03), 21721375 (p=2.80e-03), 22533665 (p=4.00e-03), 25118115 (p=6.40e-03), 21631924 (p=6.40e-03),
comorbidity AND rhinitis AND (eczema OR "atopic dermatitis")	58	4153	MBL2	-	641	13	2.656e-10	17014624 (p=5.03e-04), 22512728 (p=6.00e-04), 16178865 (p=7.02e-04), 17651383 (p=1.50e-03), 18700861 (p=1.60e-03), 17703412 (p=2.60e-03), 20298391 (p=3.30e-03), 25326706 (p=4.30e-03), 11255386 (p=4.80e-03), 22225939 (p=5.90e-03),
comorbidity AND rhinitis AND (eczema OR "atopic dermatitis")	59	50943	FOXP3	-	648	13	2.977e-10	20028375 (p=5.02e-04), 19679154 (p=6.01e-04), 16551363 (p=1.80e-03), 21107665 (p=2.30e-03), 17703412 (p=2.60e-03), 20599261 (p=3.00e-03), 25113399 (p=3.80e-03), 20654176 (p=4.10e-03), 11120765 (p=4.10e-03), 20920773 (p=5.00e-03),
comorbidity AND rhinitis AND (eczema OR "atopic dermatitis")	60	6915	TBXA2R	-	134	8	2.989e-10	12000493 (p=4.18e-04), 22017802 (p=1.50e-03), 15805995 (p=1.60e-03), 21070398 (p=1.70e-03), 20395963 (p=3.10e-03), 21734400 (p=3.80e-03), 19247692 (p=4.80e-03), 18031559 (p=5.10e-03),
comorbidity AND rhinitis AND (eczema OR "atopic dermatitis")	61	3568	IL5RA	-	80	7	3.712e-10	25523412 (p=4.04e-04), 24332579 (p=4.09e-04), 17362254 (p=4.11e-04), 20735756 (p=6.03e-04), 17703412 (p=2.60e-03), 19247692 (p=4.80e-03), 22560479 (p=8.10e-03),
comorbidity AND rhinitis AND (eczema OR "atopic dermatitis")	62	4842	NOS1	-	311	10	4.452e-10	16238787 (p=6.06e-04), 12911502 (p=1.70e-03), 15080837 (p=2.30e-03), 17703412 (p=2.60e-03), 20395963 (p=3.10e-03), 19247692 (p=4.80e-03), 19603529 (p=6.70e-03), 17690329 (p=9.10e-03), 17536218 (p=9.50e-03), 19657898 (p=9.50e-03),
comorbidity AND rhinitis AND (eczema OR "atopic dermatitis")	63	4056	LTC4S	-	87	7	6.558e-10	19862937 (p=6.00e-04), 20395963 (p=3.10e-03), 22722751 (p=4.50e-03), 19247692 (p=4.80e-03), 19080797 (p=5.00e-03), 17153879 (p=5.70e-03), 19524426 (p=8.60e-03),
comorbidity AND rhinitis AND (eczema OR "atopic dermatitis")	64	3593	IL12B	-	436	11	6.574e-10	15007350 (p=4.12e-04), 15322986 (p=6.03e-04), 17703412 (p=2.60e-03), 15356557 (p=3.10e-03), 20395963 (p=3.10e-03), 24654313 (p=4.50e-03), 19247692 (p=4.80e-03), 12241719 (p=6.70e-03), 17388919 (p=7.40e-03), 24957500 (p=8.40e-03),
comorbidity AND rhinitis AND (eczema OR "atopic dermatitis")	65	1401	CRP	-	1534	18	8.044e-10	21801245 (p=4.08e-04), 22554299 (p=5.04e-04), 18219765 (p=9.00e-04), 23684514 (p=3.00e-03), 22533665 (p=4.00e-03), 24152229 (p=4.20e-03), 24558995 (p=4.50e-03), 18704199 (p=4.50e-03), 22556030 (p=5.20e-03), 25230678 (p=5.50e-03),
comorbidity AND rhinitis AND (eczema OR "atopic dermatitis")	66	56946	C11orf30	-	47	6	1.007e-09	22036096 (p=5.02e-04), 23886662 (p=5.02e-04), 20503266 (p=1.60e-03), 25546184 (p=2.50e-03), 23817571 (p=5.00e-03), 23817569 (p=6.20e-03),
comorbidity AND rhinitis AND (eczema OR "atopic dermatitis")	67	1493	CTLA4	-	877	14	1.024e-09	16445777 (p=4.16e-04), 14720259 (p=7.01e-04), 20016193 (p=1.50e-03), 21356099 (p=1.80e-03), 17703412 (p=2.60e-03), 12114354 (p=2.70e-03), 20395963 (p=3.10e-03), 19824886 (p=3.90e-03), 19895409 (p=4.00e-03), 25326706 (p=4.30e-03),
comorbidity AND rhinitis AND (eczema OR "atopic dermatitis")	68	11251	PTGDR2	-	57	6	3.269e-09	19392992 (p=4.11e-04), 19290788 (p=1.70e-03), 17016057 (p=3.00e-03), 19247692 (p=4.80e-03), 22947041 (p=5.40e-03), 21762224 (p=9.30e-03),
comorbidity AND rhinitis AND (eczema OR "atopic dermatitis")	69	2615	LRRC32	-	25	5	4.434e-09	22036096 (p=5.02e-04), 23886662 (p=5.02e-04), 21907864 (p=3.30e-03), 23817571 (p=5.00e-03), 23817569 (p=6.20e-03),
comorbidity AND rhinitis AND (eczema OR "atopic dermatitis")	70	26191	PTPN22	-	408	10	5.382e-09	19248096 (p=3.30e-03), 19895409 (p=4.00e-03), 22722472 (p=4.30e-03), 20016199 (p=4.50e-03), 17579671 (p=4.50e-03), 23936838 (p=4.90e-03), 20560812 (p=5.00e-03), 23098231 (p=5.00e-03), 17553139 (p=5.70e-03), 22544573 (p=7.70e-03),
comorbidity AND rhinitis AND (eczema OR "atopic dermatitis")	71	3603	IL16	-	120	7	5.709e-09	17703412 (p=2.60e-03), 17303923 (p=4.20e-03), 14657881 (p=5.50e-03), 16387589 (p=7.70e-03), 21447961 (p=7.70e-03), 15784111 (p=8.30e-03), 11714796 (p=8.80e-03),
comorbidity AND rhinitis AND (eczema OR "atopic dermatitis")	72	3557	IL1RN	-	869	13	7.948e-09	16409203 (p=1.60e-03), 17107994 (p=1.60e-03), 16519819 (p=1.80e-03), 17703412 (p=2.60e-03), 23014359 (p=3.80e-03), 12694213 (p=4.50e-03), 19247692 (p=4.80e-03), 19431193 (p=5.30e-03), 18926055 (p=5.30e-03), 22127713 (p=6.40e-03),
comorbidity AND rhinitis AND (eczema OR "atopic dermatitis")	73	10333	TLR6	-	129	7	9.235e-09	24445834 (p=4.17e-04), 16188043 (p=1.50e-03), 17703412 (p=2.60e-03), 19254290 (p=4.30e-03), 19247692 (p=4.80e-03), 23817571 (p=5.00e-03), 23817569 (p=6.20e-03),
comorbidity AND rhinitis AND (eczema OR "atopic dermatitis")	74	3562	IL3	-	130	7	9.618e-09	23953855 (p=4.10e-04), 17362254 (p=4.11e-04), 24684517 (p=4.17e-04), 23978640 (p=7.03e-04), 17703412 (p=2.60e-03), 19247692 (p=4.80e-03), 15372320 (p=5.00e-03),
comorbidity AND rhinitis AND (eczema OR "atopic dermatitis")	75	4160	MC4R	-	324	9	1.197e-08	16507637 (p=1.50e-03), 16032553 (p=1.60e-03), 18777518 (p=1.70e-03), 19255736 (p=1.80e-03), 24348519 (p=2.30e-03), 24040077 (p=4.10e-03), 19153581 (p=4.90e-03), 12032748 (p=7.70e-03), 17492953 (p=8.70e-03),
comorbidity AND rhinitis AND (eczema OR "atopic dermatitis")	76	718	C3	-	458	10	1.487e-08	21801245 (p=4.08e-04), 18631248 (p=2.30e-03), 17703412 (p=2.60e-03), 20395963 (p=3.10e-03), 19247692 (p=4.80e-03), 18566738 (p=4.90e-03), 16355111 (p=6.40e-03), 21816153 (p=6.50e-03), 15278436 (p=6.90e-03), 18805911 (p=7.20e-03),
comorbidity AND rhinitis AND (eczema OR "atopic dermatitis")	77	675	BRCA2	-	1294	15	1.6e-08	16168130 (p=1.60e-03), 16622123 (p=1.60e-03), 21149333 (p=4.00e-03), 15986445 (p=5.20e-03), 16541324 (p=5.20e-03), 12611452 (p=5.60e-03), 20924075 (p=5.60e-03), 16137751 (p=6.30e-03), 16118051 (p=6.90e-03), 12473589 (p=7.40e-03),
comorbidity AND rhinitis AND (eczema OR "atopic dermatitis")	78	81793	TLR10	-	77	6	1.825e-08	17703412 (p=2.60e-03), 15201134 (p=2.70e-03), 19254290 (p=4.30e-03), 19247692 (p=4.80e-03), 23817571 (p=5.00e-03), 23817569 (p=6.20e-03),
comorbidity AND rhinitis AND (eczema OR "atopic dermatitis")	79	3553	IL1B	-	2138	19	1.855e-08	18416756 (p=2.00e-03), 19096964 (p=2.40e-03), 17703412 (p=2.60e-03), 21440944 (p=3.90e-03), 24853301 (p=4.40e-03), 12694213 (p=4.50e-03), 24654313 (p=4.50e-03), 15974847 (p=4.50e-03), 19247692 (p=4.80e-03), 19431193 (p=5.30e-03),
comorbidity AND rhinitis AND (eczema OR "atopic dermatitis")	80	30009	TBX21	-	146	7	2.006e-08	17949803 (p=5.03e-04), 22303482 (p=1.60e-03), 16179640 (p=1.80e-03), 17703412 (p=2.60e-03), 19362357 (p=5.00e-03), 16874959 (p=6.70e-03), 21114556 (p=7.20e-03),
comorbidity AND rhinitis AND (eczema OR "atopic dermatitis")	81	1232	CCR3	-	168	7	5.264e-08	20726325 (p=4.12e-04), 20220260 (p=4.15e-04), 11307756 (p=7.04e-04), 17845580 (p=1.20e-03), 17135764 (p=1.60e-03), 17703412 (p=2.60e-03), 19247692 (p=4.80e-03),
comorbidity AND rhinitis AND (eczema OR "atopic dermatitis")	82	9370	ADIPOQ	-	1655	16	6.091e-08	19725899 (p=4.15e-04), 18442802 (p=4.15e-04), 18221467 (p=4.18e-04), 24147569 (p=6.02e-04), 20188864 (p=9.01e-04), 20593932 (p=1.60e-03), 15292348 (p=2.40e-03), 18650840 (p=4.00e-03), 17119002 (p=4.20e-03), 16896567 (p=4.40e-03),
comorbidity AND rhinitis AND (eczema OR "atopic dermatitis")	83	10392	NOD1	-	172	7	6.049e-08	16918516 (p=4.05e-04), 15990792 (p=6.03e-04), 20395963 (p=3.10e-03), 19843337 (p=4.80e-03), 19247692 (p=4.80e-03), 15718249 (p=6.40e-03), 17620097 (p=6.90e-03),
comorbidity AND rhinitis AND (eczema OR "atopic dermatitis")	84	6361	CCL17	-	107	6	1.253e-07	22017510 (p=4.18e-04), 24628072 (p=1.60e-03), 17703412 (p=2.60e-03), 14767451 (p=2.70e-03), 24698291 (p=5.30e-03), 18266834 (p=5.50e-03),
comorbidity AND rhinitis AND (eczema OR "atopic dermatitis")	85	3597	IL13RA1	-	49	5	1.266e-07	17392323 (p=1.60e-03), 17703412 (p=2.60e-03), 12522691 (p=2.70e-03), 21425907 (p=3.30e-03), 21913997 (p=9.90e-03),
comorbidity AND rhinitis AND (eczema OR "atopic dermatitis")	86	10	NAT2	-	607	10	1.834e-07	23622008 (p=1.60e-03), 16533241 (p=1.60e-03), 16886893 (p=4.30e-03), 19608015 (p=4.50e-03), 19247692 (p=4.80e-03), 20088379 (p=4.90e-03), 12492617 (p=6.20e-03), 22947533 (p=7.10e-03), 22246524 (p=7.70e-03), 12360107 (p=9.20e-03),
comorbidity AND rhinitis AND (eczema OR "atopic dermatitis")	87	3552	IL1A	-	793	11	2.187e-07	12752325 (p=5.04e-04), 12209090 (p=1.60e-03), 18416756 (p=2.00e-03), 17703412 (p=2.60e-03), 15974847 (p=4.50e-03), 19247692 (p=4.80e-03), 19431193 (p=5.30e-03), 15007345 (p=6.00e-03), 23527710 (p=7.40e-03), 17388919 (p=7.40e-03),
comorbidity AND rhinitis AND (eczema OR "atopic dermatitis")	88	3077	HFE	-	798	11	2.301e-07	16102632 (p=2.60e-03), 11812557 (p=4.10e-03), 20145272 (p=4.50e-03), 11960577 (p=5.30e-03), 23188073 (p=6.40e-03), 19554541 (p=6.90e-03), 20583211 (p=6.90e-03), 14966054 (p=8.10e-03), 12427496 (p=9.30e-03), 23657305 (p=9.50e-03),
comorbidity AND rhinitis AND (eczema OR "atopic dermatitis")	89	383	ARG1	-	122	6	2.605e-07	16387594 (p=5.02e-04), 17703412 (p=2.60e-03), 19281908 (p=4.00e-03), 18478052 (p=4.00e-03), 25027824 (p=5.20e-03), 18617639 (p=5.50e-03),
comorbidity AND rhinitis AND (eczema OR "atopic dermatitis")	90	3176	HNMT	-	57	5	2.606e-07	19025430 (p=4.14e-04), 17651147 (p=7.04e-04), 17703412 (p=2.60e-03), 19247692 (p=4.80e-03), 21138759 (p=7.20e-03),
comorbidity AND rhinitis AND (eczema OR "atopic dermatitis")	91	5097	PCDH1	-	20	4	3.089e-07	23050600 (p=4.11e-04), 23988763 (p=7.02e-04), 21929597 (p=5.00e-03), 19729670 (p=9.70e-03),
comorbidity AND rhinitis AND (eczema OR "atopic dermatitis")	92	3992	FADS1	-	129	6	3.52e-07	21793953 (p=4.12e-04), 22629455 (p=1.60e-03), 16670158 (p=2.60e-03), 20045144 (p=4.70e-03), 18626191 (p=7.70e-03), 20948998 (p=8.50e-03),
comorbidity AND rhinitis AND (eczema OR "atopic dermatitis")	93	1080	CFTR	-	1261	13	4.29e-07	15781764 (p=1.50e-03), 20298391 (p=3.30e-03), 12881616 (p=4.00e-03), 19247692 (p=4.80e-03), 16678395 (p=5.30e-03), 15486385 (p=6.80e-03), 23378603 (p=7.10e-03), 11243954 (p=7.50e-03), 18361452 (p=8.50e-03), 11802245 (p=8.80e-03),
comorbidity AND rhinitis AND (eczema OR "atopic dermatitis")	94	2625	GATA3	-	243	7	5.748e-07	18037162 (p=4.19e-04), 18410415 (p=5.01e-04), 17703412 (p=2.60e-03), 15637551 (p=2.80e-03), 19247692 (p=4.80e-03), 23817569 (p=6.20e-03), 21114556 (p=7.20e-03),
comorbidity AND rhinitis AND (eczema OR "atopic dermatitis")	95	1116	CHI3L1	-	244	7	5.85e-07	20538957 (p=7.02e-04), 19568425 (p=1.50e-03), 25056157 (p=2.70e-03), 21530869 (p=2.70e-03), 23397672 (p=5.00e-03), 24954373 (p=9.30e-03), 18403759 (p=9.50e-03),
comorbidity AND rhinitis AND (eczema OR "atopic dermatitis")	96	8809	IL18R1	-	73	5	8.635e-07	23028483 (p=2.10e-03), 20860503 (p=2.30e-03), 17703412 (p=2.60e-03), 23817571 (p=5.00e-03), 19910030 (p=9.50e-03),
comorbidity AND rhinitis AND (eczema OR "atopic dermatitis")	97	3351	HTR1B	-	153	6	9.242e-07	21906503 (p=1.50e-03), 15318027 (p=3.90e-03), 18937842 (p=5.30e-03), 19721846 (p=6.30e-03), 12192616 (p=6.90e-03), 16443280 (p=7.70e-03),
comorbidity AND rhinitis AND (eczema OR "atopic dermatitis")	98	149233	IL23R	-	267	7	1.046e-06	17703412 (p=2.60e-03), 20024904 (p=4.00e-03), 21206965 (p=7.40e-03), 17618837 (p=7.70e-03), 23818276 (p=8.20e-03), 24957500 (p=8.40e-03), 17587057 (p=8.60e-03),
comorbidity AND rhinitis AND (eczema OR "atopic dermatitis")	99	1672	DEFB1	-	160	6	1.181e-06	22059360 (p=1.50e-03), 16435024 (p=1.70e-03), 15696078 (p=2.70e-03), 20618470 (p=4.90e-03), 18817538 (p=7.70e-03), 17108702 (p=9.50e-03),
comorbidity AND rhinitis AND (eczema OR "atopic dermatitis")	100	7096	TLR1	-	163	6	1.306e-06	24445834 (p=4.17e-04), 17703412 (p=2.60e-03), 19254290 (p=4.30e-03), 19627277 (p=4.50e-03), 23817571 (p=5.00e-03), 23817569 (p=6.20e-03),
comorbidity AND rhinitis AND (eczema OR "atopic dermatitis")	101	4846	NOS3	-	1647	14	1.354e-06	16238787 (p=6.06e-04), 20955262 (p=6.07e-04), 22304542 (p=1.50e-03), 18486767 (p=1.60e-03), 19968769 (p=4.10e-03), 22368302 (p=4.30e-03), 19247692 (p=4.80e-03), 17243909 (p=6.20e-03), 19603529 (p=6.70e-03), 12190658 (p=6.80e-03),
comorbidity AND rhinitis AND (eczema OR "atopic dermatitis")	102	672	BRCA1	-	2159	16	1.461e-06	16168130 (p=1.60e-03), 16622123 (p=1.60e-03), 21149333 (p=4.00e-03), 15986445 (p=5.20e-03), 16541324 (p=5.20e-03), 8968716 (p=5.30e-03), 12611452 (p=5.60e-03), 20924075 (p=5.60e-03), 16137751 (p=6.30e-03), 16118051 (p=6.90e-03),
comorbidity AND rhinitis AND (eczema OR "atopic dermatitis")	103	4843	NOS2	-	641	9	2.846e-06	16703578 (p=6.08e-04), 17177683 (p=1.50e-03), 17703412 (p=2.60e-03), 11692109 (p=2.70e-03), 22368302 (p=4.30e-03), 19247692 (p=4.80e-03), 18774388 (p=6.30e-03), 19996333 (p=6.40e-03), 24315451 (p=8.60e-03),
comorbidity AND rhinitis AND (eczema OR "atopic dermatitis")	104	3142	HLX	-	36	4	3.245e-06	22303482 (p=1.60e-03), 19295429 (p=1.60e-03), 19038437 (p=1.60e-03), 19362357 (p=5.00e-03),
comorbidity AND rhinitis AND (eczema OR "atopic dermatitis")	105	2638	GC	-	195	6	3.585e-06	24447085 (p=1.60e-03), 14987123 (p=4.80e-03), 22673963 (p=6.30e-03), 24646907 (p=6.40e-03), 19852851 (p=8.10e-03), 24007655 (p=8.70e-03),
comorbidity AND rhinitis AND (eczema OR "atopic dermatitis")	106	2875	GPT	-	103	5	4.435e-06	23522007 (p=7.03e-04), 23403445 (p=2.70e-03), 21720553 (p=4.50e-03), 23880909 (p=6.40e-03), 22954960 (p=9.60e-03),
comorbidity AND rhinitis AND (eczema OR "atopic dermatitis")	107	1234	CCR5	-	1345	12	4.677e-06	21465943 (p=4.15e-04), 20220260 (p=4.15e-04), 12612298 (p=4.17e-04), 18972295 (p=1.60e-03), 12023175 (p=1.60e-03), 17135764 (p=1.60e-03), 17703412 (p=2.60e-03), 16855620 (p=4.10e-03), 25891238 (p=4.10e-03), 19247692 (p=4.80e-03),
comorbidity AND rhinitis AND (eczema OR "atopic dermatitis")	108	4589	MUC7	-	41	4	5.349e-06	17703412 (p=2.60e-03), 19247692 (p=4.80e-03), 19820409 (p=5.70e-03), 11378823 (p=8.40e-03),
comorbidity AND rhinitis AND (eczema OR "atopic dermatitis")	109	10850	CCL27	-	41	4	5.3e-06	22017510 (p=4.18e-04), 17703412 (p=2.60e-03), 14767451 (p=2.70e-03), 18266834 (p=5.50e-03),
comorbidity AND rhinitis AND (eczema OR "atopic dermatitis")	110	5444	PON1	-	915	10	5.88e-06	23406590 (p=1.70e-03), 19022366 (p=2.30e-03), 20221876 (p=4.30e-03), 24834831 (p=4.50e-03), 16008163 (p=5.00e-03), 19646734 (p=5.00e-03), 15270786 (p=5.40e-03), 19371607 (p=6.40e-03), 20227490 (p=9.30e-03), 20734577 (p=9.40e-03),
comorbidity AND rhinitis AND (eczema OR "atopic dermatitis")	111	7421	VDR	-	1435	12	8.634e-06	15282200 (p=7.03e-04), 17703412 (p=2.60e-03), 19247692 (p=4.80e-03), 19094076 (p=5.30e-03), 22130867 (p=7.10e-03), 15651992 (p=7.80e-03), 24007655 (p=8.70e-03), 17211561 (p=8.80e-03), 15282199 (p=8.80e-03), 21818054 (p=9.10e-03),
comorbidity AND rhinitis AND (eczema OR "atopic dermatitis")	112	2207	FCER1G	-	49	4	1.072e-05	17430357 (p=6.02e-04), 11980568 (p=7.02e-04), 20028371 (p=1.60e-03), 12836193 (p=4.30e-03),
comorbidity AND rhinitis AND (eczema OR "atopic dermatitis")	113	3659	IRF1	-	242	6	1.178e-05	18079498 (p=4.05e-04), 19295429 (p=1.60e-03), 17703412 (p=2.60e-03), 19247692 (p=4.80e-03), 16961714 (p=5.00e-03), 11069564 (p=5.30e-03),
comorbidity AND rhinitis AND (eczema OR "atopic dermatitis")	114	256076	COL6A5	-	12	3	1.253e-05	21353297 (p=4.07e-04), 17850181 (p=7.02e-04), 24348519 (p=2.30e-03),
comorbidity AND rhinitis AND (eczema OR "atopic dermatitis")	115	729230	CCR2	-	415	7	1.708e-05	19082218 (p=4.03e-04), 20220260 (p=4.15e-04), 17135764 (p=1.60e-03), 17703412 (p=2.60e-03), 18615095 (p=2.70e-03), 23454776 (p=4.90e-03), 19055601 (p=6.70e-03),
comorbidity AND rhinitis AND (eczema OR "atopic dermatitis")	116	6347	CCL2	-	1074	10	2.26e-05	15005768 (p=4.13e-04), 23180368 (p=6.03e-04), 11544456 (p=6.05e-04), 19496969 (p=7.04e-04), 17703412 (p=2.60e-03), 18615095 (p=2.70e-03), 19247692 (p=4.80e-03), 23454776 (p=4.90e-03), 19055601 (p=6.70e-03), 20861640 (p=9.30e-03),
comorbidity AND rhinitis AND (eczema OR "atopic dermatitis")	117	5265	SERPINA1	-	457	7	3.167e-05	22414631 (p=2.60e-03), 20298391 (p=3.30e-03), 14616761 (p=4.30e-03), 22912729 (p=5.30e-03), 12612303 (p=6.90e-03), 17203708 (p=7.00e-03), 22971141 (p=8.70e-03),
comorbidity AND rhinitis AND (eczema OR "atopic dermatitis")	118	4128	MAOA	-	461	7	3.323e-05	23215821 (p=1.50e-03), 23076524 (p=1.80e-03), 18188752 (p=2.40e-03), 18075472 (p=4.00e-03), 16856146 (p=5.00e-03), 21099450 (p=5.40e-03), 16814261 (p=7.30e-03),
comorbidity AND rhinitis AND (eczema OR "atopic dermatitis")	119	84868	HAVCR2	-	166	5	4.215e-05	16159638 (p=5.01e-04), 17703412 (p=2.60e-03), 16940744 (p=3.40e-03), 19566956 (p=4.50e-03), 15867855 (p=6.90e-03),
comorbidity AND rhinitis AND (eczema OR "atopic dermatitis")	120	3576	CXCL8	-	1713	12	4.526e-05	19496969 (p=7.04e-04), 20194818 (p=1.60e-03), 18416756 (p=2.00e-03), 17703412 (p=2.60e-03), 15356575 (p=3.00e-03), 25326706 (p=4.30e-03), 24853301 (p=4.40e-03), 19247692 (p=4.80e-03), 24102466 (p=5.00e-03), 17388919 (p=7.40e-03),
comorbidity AND rhinitis AND (eczema OR "atopic dermatitis")	121	114548	NLRP3	-	309	6	4.522e-05	17178985 (p=2.60e-03), 22935299 (p=4.50e-03), 21109514 (p=5.00e-03), 17620097 (p=6.90e-03), 23440695 (p=6.90e-03), 11687797 (p=9.30e-03),
comorbidity AND rhinitis AND (eczema OR "atopic dermatitis")	122	1813	DRD2	-	936	9	5.108e-05	16679343 (p=1.50e-03), 22531292 (p=1.80e-03), 18188752 (p=2.40e-03), 14643564 (p=3.80e-03), 18030083 (p=4.00e-03), 11331109 (p=7.40e-03), 24283216 (p=8.10e-03), 18501970 (p=8.60e-03), 17044099 (p=9.30e-03),
comorbidity AND rhinitis AND (eczema OR "atopic dermatitis")	123	64478	CSMD1	-	76	4	5.788e-05	23453885 (p=1.20e-03), 22424883 (p=2.60e-03), 25456346 (p=4.80e-03), 23472165 (p=5.00e-03),
comorbidity AND rhinitis AND (eczema OR "atopic dermatitis")	124	3600	IL15	-	344	6	8.154e-05	16333313 (p=4.16e-04), 16629787 (p=6.07e-04), 17703412 (p=2.60e-03), 15131572 (p=3.80e-03), 19133918 (p=4.10e-03), 19247692 (p=4.80e-03),
comorbidity AND rhinitis AND (eczema OR "atopic dermatitis")	125	150	ADRA2A	-	194	5	8.605e-05	12815749 (p=1.80e-03), 16806103 (p=2.60e-03), 19922756 (p=4.50e-03), 19088492 (p=5.60e-03), 24166412 (p=6.90e-03),
comorbidity AND rhinitis AND (eczema OR "atopic dermatitis")	126	7941	PLA2G7	-	196	5	8.975e-05	23103135 (p=4.10e-03), 22338104 (p=4.30e-03), 19247692 (p=4.80e-03), 10733466 (p=5.00e-03), 23413990 (p=8.50e-03),
comorbidity AND rhinitis AND (eczema OR "atopic dermatitis")	127	335	APOA1	-	774	8	9.758e-05	19218819 (p=4.17e-04), 22674204 (p=7.03e-04), 14567398 (p=2.70e-03), 22287661 (p=4.00e-03), 23889245 (p=4.30e-03), 12011770 (p=6.40e-03), 20538481 (p=8.80e-03), 20368199 (p=8.80e-03),
comorbidity AND rhinitis AND (eczema OR "atopic dermatitis")	128	117156	SCGB3A2	-	24	3	0.0001018	21410962 (p=2.60e-03), 19247692 (p=4.80e-03), 21170691 (p=6.00e-03),
comorbidity AND rhinitis AND (eczema OR "atopic dermatitis")	129	6367	CCL22	-	92	4	0.0001187	23106659 (p=4.13e-04), 17703412 (p=2.60e-03), 19175890 (p=5.00e-03), 18266834 (p=5.50e-03),
comorbidity AND rhinitis AND (eczema OR "atopic dermatitis")	130	3594	IL12RB1	-	93	4	0.0001229	21689850 (p=1.60e-03), 17703412 (p=2.60e-03), 16159888 (p=2.70e-03), 19247692 (p=4.80e-03),
comorbidity AND rhinitis AND (eczema OR "atopic dermatitis")	131	121278	TPH2	-	212	5	0.0001265	21418060 (p=3.50e-03), 23360517 (p=4.00e-03), 23461725 (p=4.50e-03), 20921119 (p=4.90e-03), 18937842 (p=5.30e-03),
comorbidity AND rhinitis AND (eczema OR "atopic dermatitis")	132	3356	HTR2A	-	589	7	0.0001453	20006992 (p=3.90e-03), 17938636 (p=4.00e-03), 12475403 (p=4.30e-03), 18937842 (p=5.30e-03), 16958038 (p=7.20e-03), 16443280 (p=7.70e-03), 12167522 (p=9.10e-03),
comorbidity AND rhinitis AND (eczema OR "atopic dermatitis")	133	1215	CMA1	-	100	4	0.0001604	15248847 (p=5.05e-04), 20736038 (p=1.00e-03), 18973102 (p=2.30e-03), 16134991 (p=3.30e-03),
comorbidity AND rhinitis AND (eczema OR "atopic dermatitis")	134	1816	DRD5	-	101	4	0.0001658	16389711 (p=3.40e-03), 20006992 (p=3.90e-03), 18563476 (p=4.00e-03), 18081165 (p=9.50e-03),
comorbidity AND rhinitis AND (eczema OR "atopic dermatitis")	135	5054	SERPINE1	-	1115	9	0.0001804	22361338 (p=4.10e-04), 19063817 (p=6.03e-04), 22578058 (p=1.60e-03), 16409202 (p=1.60e-03), 21478212 (p=2.60e-03), 16789641 (p=3.10e-03), 16896567 (p=4.40e-03), 19247692 (p=4.80e-03), 18714537 (p=9.10e-03),
comorbidity AND rhinitis AND (eczema OR "atopic dermatitis")	136	56729	RETN	-	410	6	0.0002011	18221467 (p=4.18e-04), 23648099 (p=1.60e-03), 23685419 (p=3.10e-03), 20093199 (p=4.40e-03), 22886618 (p=5.00e-03), 16313475 (p=6.40e-03),
comorbidity AND rhinitis AND (eczema OR "atopic dermatitis")	137	91937	TIMD4	-	31	3	0.0002103	16940744 (p=3.40e-03), 19392790 (p=5.50e-03), 24204099 (p=5.90e-03),
comorbidity AND rhinitis AND (eczema OR "atopic dermatitis")	138	27159	CHIA	-	33	3	0.000253	20538957 (p=7.02e-04), 17703412 (p=2.60e-03), 19247692 (p=4.80e-03),
comorbidity AND rhinitis AND (eczema OR "atopic dermatitis")	139	6095	RORA	-	115	4	0.0002676	24142618 (p=1.70e-03), 20860503 (p=2.30e-03), 22424883 (p=2.60e-03), 23565190 (p=6.50e-03),
comorbidity AND rhinitis AND (eczema OR "atopic dermatitis")	140	51135	IRAK4	-	117	4	0.0002844	21738793 (p=1.40e-03), 22932140 (p=1.80e-03), 17703412 (p=2.60e-03), 19254290 (p=4.30e-03),
comorbidity AND rhinitis AND (eczema OR "atopic dermatitis")	141	386653	IL31	-	36	3	0.0003235	17030248 (p=2.30e-03), 21294778 (p=3.10e-03), 25270263 (p=7.60e-03),
comorbidity AND rhinitis AND (eczema OR "atopic dermatitis")	142	241	ALOX5AP	-	122	4	0.0003309	18547289 (p=7.02e-04), 22537113 (p=3.00e-03), 19524426 (p=8.60e-03), 20067482 (p=8.90e-03),
comorbidity AND rhinitis AND (eczema OR "atopic dermatitis")	143	29851	ICOS	-	124	4	0.0003504	19175887 (p=2.07e-04), 21356099 (p=1.80e-03), 19824886 (p=3.90e-03), 19247692 (p=4.80e-03),
comorbidity AND rhinitis AND (eczema OR "atopic dermatitis")	144	3558	IL2	-	692	7	0.0003708	16333313 (p=4.16e-04), 22036096 (p=5.02e-04), 17703412 (p=2.60e-03), 20599261 (p=3.00e-03), 23817571 (p=5.00e-03), 11354638 (p=7.10e-03), 16961803 (p=9.80e-03),
comorbidity AND rhinitis AND (eczema OR "atopic dermatitis")	145	55054	ATG16L1	-	129	4	0.000404	20024904 (p=4.00e-03), 18366306 (p=5.00e-03), 18088053 (p=6.90e-03), 21206965 (p=7.40e-03),
comorbidity AND rhinitis AND (eczema OR "atopic dermatitis")	146	3569	IL6	-	3314	15	0.00047	16344268 (p=4.16e-04), 16759385 (p=1.20e-03), 15120189 (p=1.60e-03), 17703412 (p=2.60e-03), 20599261 (p=3.00e-03), 12694213 (p=4.50e-03), 12846758 (p=5.30e-03), 18399716 (p=6.70e-03), 11354638 (p=7.10e-03), 16540751 (p=7.20e-03),
comorbidity AND rhinitis AND (eczema OR "atopic dermatitis")	147	3581	IL9R	-	46	3	0.0006552	17703412 (p=2.60e-03), 17083349 (p=2.60e-03), 21371865 (p=4.40e-03),
comorbidity AND rhinitis AND (eczema OR "atopic dermatitis")	148	940	CD28	-	308	5	0.0006751	21356099 (p=1.80e-03), 17703412 (p=2.60e-03), 19824886 (p=3.90e-03), 19852851 (p=8.10e-03), 19735272 (p=8.60e-03),
comorbidity AND rhinitis AND (eczema OR "atopic dermatitis")	149	3106	HLA-B	-	1685	10	0.000742	17487448 (p=7.02e-04), 15853903 (p=2.40e-03), 18785306 (p=2.60e-03), 20868574 (p=3.10e-03), 23817571 (p=5.00e-03), 23356447 (p=5.20e-03), 25234663 (p=5.20e-03), 12969506 (p=6.40e-03), 19248087 (p=9.40e-03), 22011437 (p=9.70e-03),
comorbidity AND rhinitis AND (eczema OR "atopic dermatitis")	150	125	ADH1B	-	316	5	0.0007525	23806636 (p=4.10e-04), 20357489 (p=4.11e-04), 25410943 (p=6.90e-03), 23550892 (p=7.60e-03), 16520888 (p=7.70e-03),
comorbidity AND rhinitis AND (eczema OR "atopic dermatitis")	151	81704	DOCK8	-	50	3	0.0008215	24898675 (p=4.00e-04), 21931011 (p=3.90e-03), 22534316 (p=5.00e-03),
comorbidity AND rhinitis AND (eczema OR "atopic dermatitis")	152	6356	CCL11	-	165	4	0.001013	23180368 (p=6.03e-04), 17845580 (p=1.20e-03), 17703412 (p=2.60e-03), 19247692 (p=4.80e-03),
comorbidity AND rhinitis AND (eczema OR "atopic dermatitis")	153	6346	CCL1	-	54	3	0.001023	17845580 (p=1.20e-03), 15814739 (p=1.60e-03), 17703412 (p=2.60e-03),
comorbidity AND rhinitis AND (eczema OR "atopic dermatitis")	154	3107	HLA-C	-	826	7	0.001045	19480679 (p=2.50e-03), 23817571 (p=5.00e-03), 17878941 (p=5.60e-03), 23817569 (p=6.20e-03), 17388919 (p=7.40e-03), 12148091 (p=9.30e-03), 22185807 (p=9.60e-03),
comorbidity AND rhinitis AND (eczema OR "atopic dermatitis")	155	6530	SLC6A2	-	178	4	0.001335	23185385 (p=4.30e-03), 19721846 (p=6.30e-03), 25338091 (p=8.60e-03), 18081710 (p=8.60e-03),
comorbidity AND rhinitis AND (eczema OR "atopic dermatitis")	156	727	C5	-	186	4	0.001575	20143644 (p=4.06e-04), 17703412 (p=2.60e-03), 19247692 (p=4.80e-03), 15278436 (p=6.90e-03),
comorbidity AND rhinitis AND (eczema OR "atopic dermatitis")	157	6775	STAT4	-	187	4	0.001597	17703412 (p=2.60e-03), 15637551 (p=2.80e-03), 15744455 (p=4.10e-03), 17532201 (p=8.10e-03),
comorbidity AND rhinitis AND (eczema OR "atopic dermatitis")	158	3075	CFH	-	614	6	0.00162	16519819 (p=1.80e-03), 25880396 (p=4.10e-03), 18704199 (p=4.50e-03), 21816153 (p=6.50e-03), 18538409 (p=7.10e-03), 18164066 (p=8.40e-03),
comorbidity AND rhinitis AND (eczema OR "atopic dermatitis")	159	6441	SFTPD	-	191	4	0.001713	16426259 (p=1.80e-03), 17703412 (p=2.60e-03), 19493231 (p=2.70e-03), 18355911 (p=3.90e-03),
comorbidity AND rhinitis AND (eczema OR "atopic dermatitis")	160	942	CD86	-	194	4	0.001808	17513529 (p=5.03e-04), 17703412 (p=2.60e-03), 19852851 (p=8.10e-03), 19735272 (p=8.60e-03),
comorbidity AND rhinitis AND (eczema OR "atopic dermatitis")	161	4026	LPP	-	69	3	0.002033	22075330 (p=2.60e-03), 23817571 (p=5.00e-03), 23817569 (p=6.20e-03),
comorbidity AND rhinitis AND (eczema OR "atopic dermatitis")	162	83852	SETDB2	-	10	2	0.002258	20085599 (p=4.08e-04), 12754510 (p=1.60e-03),
comorbidity AND rhinitis AND (eczema OR "atopic dermatitis")	163	1394	CRHR1	-	209	4	0.002368	22748421 (p=2.20e-03), 19247692 (p=4.80e-03), 17597588 (p=7.40e-03), 24099078 (p=9.00e-03),
comorbidity AND rhinitis AND (eczema OR "atopic dermatitis")	164	1906	EDN1	-	669	6	0.002481	11831453 (p=1.60e-03), 11991554 (p=1.70e-03), 17703412 (p=2.60e-03), 19730395 (p=2.80e-03), 19247692 (p=4.80e-03), 18580062 (p=8.90e-03),
comorbidity AND rhinitis AND (eczema OR "atopic dermatitis")	165	5468	PPARG	-	1639	9	0.002575	17322631 (p=4.10e-03), 16896567 (p=4.40e-03), 18598350 (p=5.30e-03), 17329993 (p=5.70e-03), 21540831 (p=7.30e-03), 18211635 (p=8.60e-03), 21548985 (p=8.80e-03), 15543217 (p=9.50e-03), 18984664 (p=9.60e-03),
comorbidity AND rhinitis AND (eczema OR "atopic dermatitis")	166	4318	MMP9	-	2011	10	0.002635	22237587 (p=4.15e-04), 20181264 (p=5.04e-04), 23639553 (p=2.00e-03), 18391843 (p=3.10e-03), 20395963 (p=3.10e-03), 22391064 (p=3.30e-03), 19958602 (p=6.90e-03), 18451255 (p=7.10e-03), 18571010 (p=7.20e-03), 20305574 (p=9.70e-03),
comorbidity AND rhinitis AND (eczema OR "atopic dermatitis")	167	7177	TPSAB1	-	80	3	0.003052	24054365 (p=5.03e-04), 24372627 (p=6.04e-04), 23018683 (p=2.60e-03),
comorbidity AND rhinitis AND (eczema OR "atopic dermatitis")	168	1812	DRD1	-	227	4	0.00316	17679637 (p=4.10e-03), 18937842 (p=5.30e-03), 22404661 (p=6.10e-03), 19695183 (p=7.40e-03),
comorbidity AND rhinitis AND (eczema OR "atopic dermatitis")	169	240	ALOX5	-	231	4	0.00336	16364163 (p=1.50e-03), 17703412 (p=2.60e-03), 19247692 (p=4.80e-03), 19524426 (p=8.60e-03),
comorbidity AND rhinitis AND (eczema OR "atopic dermatitis")	170	6362	CCL18	-	85	3	0.003592	15494534 (p=1.50e-03), 17703412 (p=2.60e-03), 21539615 (p=5.00e-03),
comorbidity AND rhinitis AND (eczema OR "atopic dermatitis")	171	728215	FAM155A	-	14	2	0.004318	23453885 (p=1.20e-03), 18951430 (p=9.90e-03),
comorbidity AND rhinitis AND (eczema OR "atopic dermatitis")	172	7422	VEGFA	-	3387	13	0.004386	24152156 (p=6.02e-04), 17651148 (p=1.60e-03), 22461367 (p=1.70e-03), 18261732 (p=3.40e-03), 19196819 (p=4.00e-03), 25255852 (p=4.10e-03), 25326706 (p=4.30e-03), 23828162 (p=4.90e-03), 16630077 (p=5.00e-03), 24102466 (p=5.00e-03),
comorbidity AND rhinitis AND (eczema OR "atopic dermatitis")	173	1118	CHIT1	-	92	3	0.004466	20538957 (p=7.02e-04), 17693102 (p=1.20e-03), 23706714 (p=5.10e-03),
comorbidity AND rhinitis AND (eczema OR "atopic dermatitis")	174	7850	IL1R2	-	94	3	0.004733	23453885 (p=1.20e-03), 17703412 (p=2.60e-03), 19489917 (p=4.10e-03),
comorbidity AND rhinitis AND (eczema OR "atopic dermatitis")	175	4157	MC1R	-	258	4	0.004957	15998953 (p=4.10e-03), 16567973 (p=4.10e-03), 22158557 (p=8.40e-03), 20301115 (p=8.60e-03),
comorbidity AND rhinitis AND (eczema OR "atopic dermatitis")	176	10452	TOMM40	-	98	3	0.005296	24770881 (p=5.40e-03), 18823527 (p=5.60e-03), 24508314 (p=6.90e-03),
comorbidity AND rhinitis AND (eczema OR "atopic dermatitis")	177	4803	NGF	-	264	4	0.005351	18179783 (p=1.30e-03), 19076929 (p=2.30e-03), 17703412 (p=2.60e-03), 18763222 (p=4.10e-03),
comorbidity AND rhinitis AND (eczema OR "atopic dermatitis")	178	2153	F5	-	1125	7	0.005815	20048104 (p=2.40e-03), 20492466 (p=4.90e-03), 15009459 (p=5.70e-03), 22528331 (p=9.00e-03), 19336355 (p=9.30e-03), 12454577 (p=9.40e-03), 19609209 (p=9.50e-03),
comorbidity AND rhinitis AND (eczema OR "atopic dermatitis")	179	132612	ADAD1	-	17	2	0.006156	23817571 (p=5.00e-03), 23817569 (p=6.20e-03),
comorbidity AND rhinitis AND (eczema OR "atopic dermatitis")	180	7292	TNFSF4	-	111	3	0.007486	21820713 (p=9.01e-04), 21781408 (p=5.00e-03), 18060034 (p=9.50e-03),
comorbidity AND rhinitis AND (eczema OR "atopic dermatitis")	181	3240	HP	-	290	4	0.007483	23268292 (p=3.40e-03), 25493023 (p=4.00e-03), 18258668 (p=4.50e-03), 17304451 (p=9.50e-03),
comorbidity AND rhinitis AND (eczema OR "atopic dermatitis")	182	3570	IL6R	-	291	4	0.007539	17703412 (p=2.60e-03), 20599261 (p=3.00e-03), 21907864 (p=3.30e-03), 23582566 (p=4.70e-03),
comorbidity AND rhinitis AND (eczema OR "atopic dermatitis")	183	3587	IL10RA	-	114	3	0.007967	20232770 (p=7.03e-04), 17703412 (p=2.60e-03), 16961803 (p=9.80e-03),
comorbidity AND rhinitis AND (eczema OR "atopic dermatitis")	184	7132	TNFRSF1A	-	549	5	0.008028	17703412 (p=2.60e-03), 19804406 (p=3.00e-03), 25255422 (p=5.90e-03), 19541728 (p=9.50e-03), 11443543 (p=9.90e-03),
comorbidity AND rhinitis AND (eczema OR "atopic dermatitis")	185	284110	GSDMA	-	20	2	0.008307	20860503 (p=2.30e-03), 21546069 (p=8.10e-03),
comorbidity AND rhinitis AND (eczema OR "atopic dermatitis")	186	3146	HMGB1	-	559	5	0.00862	24152844 (p=1.80e-03), 26250770 (p=2.60e-03), 22333024 (p=4.80e-03), 21380479 (p=5.20e-03), 22127490 (p=5.50e-03),
comorbidity AND rhinitis AND (eczema OR "atopic dermatitis")	187	3350	HTR1A	-	307	4	0.008987	23308375 (p=4.50e-03), 18937842 (p=5.30e-03), 18663369 (p=6.20e-03), 22044630 (p=7.40e-03),
comorbidity AND rhinitis AND (eczema OR "atopic dermatitis")	188	7049	TGFBR3	-	120	3	0.009021	20386084 (p=5.03e-04), 18315732 (p=5.10e-03), 19131638 (p=9.10e-03),
comorbidity AND rhinitis AND (eczema OR "atopic dermatitis")	189	123688	HYKK	-	21	2	0.008983	22837378 (p=7.10e-03), 19300482 (p=7.30e-03),
comorbidity AND rhinitis AND (eczema OR "atopic dermatitis")	190	3592	IL12A	-	312	4	0.009402	18671862 (p=4.01e-04), 17703412 (p=2.60e-03), 15356557 (p=3.10e-03), 16961803 (p=9.80e-03),
comorbidity AND rhinitis AND (eczema OR "atopic dermatitis")	191	4916	NTRK3	-	123	3	0.009549	23453885 (p=1.20e-03), 18179783 (p=1.30e-03), 18428117 (p=9.40e-03),
comorbidity AND rhinitis AND (eczema OR "atopic dermatitis")	192	353143	LCE3B	-	22	2	0.009721	20376060 (p=3.90e-03), 21995181 (p=4.00e-03),
comorbidity AND rhinitis AND (eczema OR "atopic dermatitis")	193	3398	ID2	-	125	3	0.00991	22075330 (p=2.60e-03), 19733838 (p=3.60e-03), 23817569 (p=6.20e-03),
comorbidity AND asthma AND rhinitis AND (eczema OR "atopic dermatitis")	Rank	GeneID	Symbol	Homologs	n	n_pos	FDR	Top 10 pmids
comorbidity AND asthma AND rhinitis AND (eczema OR "atopic dermatitis")	1	2312	FLG	-	211	112	1.32e-192	19589816 (p=9.90e-05), 23078034 (p=1.02e-04), 18313126 (p=2.03e-04), 25174864 (p=2.04e-04), 19348926 (p=2.06e-04), 18396323 (p=2.06e-04), 25277085 (p=2.09e-04), 22030464 (p=2.09e-04), 25528737 (p=3.01e-04), 18325573 (p=3.02e-04),
comorbidity AND asthma AND rhinitis AND (eczema OR "atopic dermatitis")	2	3596	IL13	-	505	75	1.053e-90	22846750 (p=2.02e-04), 22023794 (p=3.02e-04), 18417506 (p=3.05e-04), 20085599 (p=4.08e-04), 22013915 (p=4.08e-04), 15007355 (p=4.12e-04), 20975284 (p=4.12e-04), 24447084 (p=4.13e-04), 16272823 (p=4.15e-04), 23754348 (p=4.17e-04),
comorbidity AND asthma AND rhinitis AND (eczema OR "atopic dermatitis")	3	929	CD14	-	601	59	6.775e-65	18417506 (p=3.05e-04), 17877764 (p=4.02e-04), 17919709 (p=4.07e-04), 16446545 (p=4.08e-04), 20085599 (p=4.08e-04), 11282774 (p=4.12e-04), 20109750 (p=4.12e-04), 12580907 (p=4.13e-04), 23194293 (p=4.14e-04), 16950285 (p=4.15e-04),
comorbidity AND asthma AND rhinitis AND (eczema OR "atopic dermatitis")	4	3566	IL4R	-	386	49	5.252e-62	20002627 (p=3.02e-04), 15737301 (p=4.04e-04), 23480403 (p=4.08e-04), 20085599 (p=4.08e-04), 17209513 (p=4.19e-04), 12422339 (p=4.19e-04), 12100043 (p=4.19e-04), 16313681 (p=4.20e-04), 17121586 (p=5.00e-04), 11709756 (p=5.03e-04),
comorbidity AND asthma AND rhinitis AND (eczema OR "atopic dermatitis")	5	80332	ADAM33	-	124	33	1.46e-56	15298558 (p=4.13e-04), 16784537 (p=5.01e-04), 15986064 (p=5.02e-04), 22349453 (p=5.03e-04), 16024651 (p=1.40e-03), 24751681 (p=1.60e-03), 18560587 (p=1.60e-03), 22871616 (p=1.60e-03), 16519819 (p=1.80e-03), 19996348 (p=2.00e-03),
comorbidity AND asthma AND rhinitis AND (eczema OR "atopic dermatitis")	6	2206	MS4A2	-	98	29	3.77e-52	15087090 (p=4.06e-04), 20085599 (p=4.08e-04), 11245344 (p=4.13e-04), 11702205 (p=4.15e-04), 12422339 (p=4.19e-04), 8805698 (p=4.20e-04), 17121586 (p=5.00e-04), 17430357 (p=6.01e-04), 20028371 (p=7.02e-04), 12047428 (p=7.03e-04),
comorbidity AND asthma AND rhinitis AND (eczema OR "atopic dermatitis")	7	3565	IL4	-	948	57	6.699e-52	15087090 (p=4.06e-04), 24447084 (p=4.13e-04), 11167377 (p=4.14e-04), 22884982 (p=4.15e-04), 19254294 (p=4.17e-04), 17209513 (p=4.19e-04), 16313681 (p=4.20e-04), 17121586 (p=5.00e-04), 19552791 (p=5.00e-04), 15970635 (p=5.01e-04),
comorbidity AND asthma AND rhinitis AND (eczema OR "atopic dermatitis")	8	154	ADRB2	-	885	52	3.569e-48	18709160 (p=4.06e-04), 20210814 (p=4.16e-04), 12422339 (p=4.19e-04), 16935688 (p=6.00e-04), 15170877 (p=6.02e-04), 24691493 (p=7.02e-04), 18849614 (p=7.02e-04), 25074500 (p=8.01e-04), 19254291 (p=9.04e-04), 15248848 (p=1.00e-03),
comorbidity AND asthma AND rhinitis AND (eczema OR "atopic dermatitis")	9	1815	DRD4	-	562	37	3.305e-39	14560322 (p=9.02e-04), 18188752 (p=1.80e-03), 19017022 (p=2.40e-03), 18563476 (p=2.40e-03), 16741944 (p=2.70e-03), 17679637 (p=2.70e-03), 20172533 (p=2.70e-03), 24391992 (p=3.00e-03), 16389711 (p=3.60e-03), 22051710 (p=3.80e-03),
comorbidity AND asthma AND rhinitis AND (eczema OR "atopic dermatitis")	10	94103	ORMDL3	-	64	18	1.337e-33	19133921 (p=4.18e-04), 21843571 (p=9.01e-04), 20372189 (p=1.00e-03), 22017802 (p=1.20e-03), 24649901 (p=1.60e-03), 20503266 (p=1.80e-03), 19175592 (p=1.80e-03), 17611496 (p=1.80e-03), 22732088 (p=1.80e-03), 20860503 (p=1.90e-03),
comorbidity AND asthma AND rhinitis AND (eczema OR "atopic dermatitis")	11	85480	TSLP	-	178	23	1.436e-33	24525665 (p=4.12e-04), 23267211 (p=4.16e-04), 22036096 (p=4.18e-04), 24397611 (p=4.18e-04), 24401911 (p=5.01e-04), 18244952 (p=5.02e-04), 21820713 (p=7.01e-04), 22973903 (p=9.02e-04), 20444170 (p=1.60e-03), 21689850 (p=1.80e-03),
comorbidity AND asthma AND rhinitis AND (eczema OR "atopic dermatitis")	12	2950	GSTP1	-	1300	44	4.305e-33	18709160 (p=4.06e-04), 15544594 (p=4.10e-04), 20210814 (p=4.16e-04), 16162701 (p=7.00e-04), 20674822 (p=7.01e-04), 14748821 (p=1.00e-03), 17711870 (p=1.00e-03), 22355322 (p=1.10e-03), 21051083 (p=1.60e-03), 20526719 (p=1.60e-03),
comorbidity AND asthma AND rhinitis AND (eczema OR "atopic dermatitis")	13	2944	GSTM1	-	1869	48	3.311e-30	19860819 (p=4.17e-04), 16162701 (p=7.00e-04), 22484660 (p=7.01e-04), 20674822 (p=7.01e-04), 24559168 (p=9.01e-04), 25328891 (p=9.02e-04), 16409207 (p=9.03e-04), 21176116 (p=1.00e-03), 17711870 (p=1.00e-03), 21051083 (p=1.60e-03),
comorbidity AND asthma AND rhinitis AND (eczema OR "atopic dermatitis")	14	387129	NPSR1	-	74	16	3.482e-28	15710598 (p=3.03e-04), 24439655 (p=4.06e-04), 25091462 (p=5.04e-04), 18340359 (p=7.03e-04), 18305139 (p=9.00e-04), 23372674 (p=9.03e-04), 19624525 (p=1.00e-03), 18285428 (p=2.00e-03), 19996348 (p=2.00e-03), 17703412 (p=2.10e-03),
comorbidity AND asthma AND rhinitis AND (eczema OR "atopic dermatitis")	15	6532	SLC6A4	-	1797	43	4.751e-27	23947391 (p=9.00e-04), 20868372 (p=1.60e-03), 16679343 (p=1.60e-03), 18188752 (p=1.80e-03), 18563476 (p=2.40e-03), 16972224 (p=2.40e-03), 16389711 (p=3.60e-03), 19154632 (p=3.80e-03), 23663729 (p=3.80e-03), 25517418 (p=3.80e-03),
comorbidity AND asthma AND rhinitis AND (eczema OR "atopic dermatitis")	16	11005	SPINK5	-	66	15	5.913e-27	20085599 (p=4.08e-04), 15005725 (p=4.09e-04), 14551605 (p=5.00e-04), 15986064 (p=5.02e-04), 17989887 (p=7.01e-04), 19534795 (p=7.04e-04), 16519819 (p=1.80e-03), 11544479 (p=1.90e-03), 19996348 (p=2.00e-03), 20395963 (p=2.90e-03),
comorbidity AND asthma AND rhinitis AND (eczema OR "atopic dermatitis")	17	6778	STAT6	-	259	21	8.338e-27	17121586 (p=5.00e-04), 18846228 (p=9.02e-04), 22017802 (p=1.20e-03), 17883727 (p=1.50e-03), 23815671 (p=1.60e-03), 17703412 (p=2.10e-03), 22075330 (p=2.20e-03), 15637551 (p=2.70e-03), 20395963 (p=2.90e-03), 12759487 (p=3.20e-03),
comorbidity AND asthma AND rhinitis AND (eczema OR "atopic dermatitis")	18	7124	TNF	-	4656	68	2.482e-25	18709160 (p=4.06e-04), 20085599 (p=4.08e-04), 15137526 (p=4.11e-04), 17450233 (p=4.14e-04), 20210814 (p=4.16e-04), 19196817 (p=6.03e-04), 17686102 (p=7.04e-04), 21307151 (p=9.01e-04), 18385169 (p=9.02e-04), 18534084 (p=9.02e-04),
comorbidity AND asthma AND rhinitis AND (eczema OR "atopic dermatitis")	19	6531	SLC6A3	-	654	26	2.497e-24	23215821 (p=9.02e-04), 17485610 (p=1.10e-03), 16389200 (p=1.40e-03), 18188752 (p=1.80e-03), 9837830 (p=2.10e-03), 23076524 (p=2.20e-03), 16741944 (p=2.70e-03), 17679637 (p=2.70e-03), 18206700 (p=3.00e-03), 16389711 (p=3.60e-03),
comorbidity AND asthma AND rhinitis AND (eczema OR "atopic dermatitis")	20	7356	SCGB1A1	-	132	16	5.068e-24	19128353 (p=4.00e-04), 15744536 (p=4.06e-04), 24735334 (p=4.14e-04), 19222419 (p=7.03e-04), 9643286 (p=8.02e-04), 20736038 (p=9.03e-04), 21255142 (p=1.30e-03), 17703412 (p=2.10e-03), 20395963 (p=2.90e-03), 17716718 (p=4.00e-03),
comorbidity AND asthma AND rhinitis AND (eczema OR "atopic dermatitis")	21	7099	TLR4	-	1682	36	1.199e-22	17877764 (p=4.02e-04), 18517079 (p=4.06e-04), 24524443 (p=4.06e-04), 15007351 (p=4.07e-04), 20085599 (p=4.08e-04), 20109750 (p=4.12e-04), 20685742 (p=4.16e-04), 14735148 (p=4.20e-04), 21820713 (p=7.01e-04), 23821954 (p=8.01e-04),
comorbidity AND asthma AND rhinitis AND (eczema OR "atopic dermatitis")	22	3586	IL10	-	2305	41	5.033e-22	25562560 (p=2.08e-04), 24167151 (p=4.00e-04), 15007355 (p=4.12e-04), 18440625 (p=5.02e-04), 14748015 (p=7.02e-04), 20232770 (p=9.02e-04), 18534084 (p=9.02e-04), 21426411 (p=9.02e-04), 16759385 (p=1.60e-03), 15120189 (p=1.60e-03),
comorbidity AND asthma AND rhinitis AND (eczema OR "atopic dermatitis")	23	3119	HLA-DQB1	-	1322	30	1.191e-20	19052351 (p=4.04e-04), 16802776 (p=4.17e-04), 17212706 (p=5.02e-04), 12890388 (p=6.01e-04), 17686102 (p=7.04e-04), 15784113 (p=1.00e-03), 20016199 (p=1.60e-03), 22281000 (p=1.90e-03), 15853903 (p=1.90e-03), 23443026 (p=3.00e-03),
comorbidity AND asthma AND rhinitis AND (eczema OR "atopic dermatitis")	24	2952	GSTT1	-	1568	32	2.265e-20	22484660 (p=7.01e-04), 24559168 (p=9.01e-04), 16409207 (p=9.03e-04), 17711870 (p=1.00e-03), 21051083 (p=1.60e-03), 17497028 (p=2.10e-03), 17937745 (p=2.80e-03), 15531593 (p=3.70e-03), 18057098 (p=4.20e-03), 20088379 (p=4.30e-03),
comorbidity AND asthma AND rhinitis AND (eczema OR "atopic dermatitis")	25	51131	PHF11	-	30	10	2.461e-20	20717939 (p=2.02e-04), 20085599 (p=4.08e-04), 19386584 (p=8.00e-04), 15674390 (p=1.60e-03), 12754510 (p=1.60e-03), 19996348 (p=2.00e-03), 17703412 (p=2.10e-03), 17702965 (p=3.00e-03), 19247692 (p=4.20e-03), 19237393 (p=9.20e-03),
comorbidity AND asthma AND rhinitis AND (eczema OR "atopic dermatitis")	26	7097	TLR2	-	1071	27	2.831e-20	17877764 (p=4.02e-04), 15007351 (p=4.07e-04), 20085599 (p=4.08e-04), 20685742 (p=4.16e-04), 21134221 (p=4.20e-04), 21281869 (p=5.03e-04), 23821954 (p=8.01e-04), 20646366 (p=9.00e-04), 18312481 (p=1.00e-03), 19096003 (p=1.40e-03),
comorbidity AND asthma AND rhinitis AND (eczema OR "atopic dermatitis")	27	4210	MEFV	-	296	17	6.618e-20	17067442 (p=7.04e-04), 15643295 (p=1.60e-03), 19115056 (p=2.90e-03), 24862656 (p=2.90e-03), 17469185 (p=3.00e-03), 24071932 (p=4.60e-03), 14727457 (p=5.10e-03), 23592051 (p=5.60e-03), 23356447 (p=6.10e-03), 18353061 (p=6.40e-03),
comorbidity AND asthma AND rhinitis AND (eczema OR "atopic dermatitis")	28	55876	GSDMB	-	40	10	6.11e-19	19029000 (p=2.06e-04), 19133921 (p=4.18e-04), 24066901 (p=8.02e-04), 17611496 (p=1.80e-03), 22732088 (p=1.80e-03), 20860503 (p=1.90e-03), 23817569 (p=3.00e-03), 25256354 (p=3.90e-03), 24315451 (p=7.10e-03), 22295569 (p=9.10e-03),
comorbidity AND asthma AND rhinitis AND (eczema OR "atopic dermatitis")	29	90865	IL33	-	228	14	3.549e-17	24568840 (p=4.19e-04), 25746970 (p=4.20e-04), 22627366 (p=5.02e-04), 20860503 (p=1.90e-03), 23817569 (p=3.00e-03), 22349136 (p=4.20e-03), 22921786 (p=4.70e-03), 23472165 (p=6.40e-03), 22329990 (p=6.50e-03), 23759184 (p=8.30e-03),
comorbidity AND asthma AND rhinitis AND (eczema OR "atopic dermatitis")	30	9173	IL1RL1	-	134	12	6.568e-17	24568840 (p=4.19e-04), 20503266 (p=1.80e-03), 20860503 (p=1.90e-03), 23028483 (p=2.00e-03), 23817569 (p=3.00e-03), 19247692 (p=4.20e-03), 23817571 (p=6.20e-03), 19852851 (p=6.70e-03), 20625511 (p=6.80e-03), 19910030 (p=8.30e-03),
comorbidity AND asthma AND rhinitis AND (eczema OR "atopic dermatitis")	31	64127	NOD2	-	753	20	1.512e-16	12704363 (p=3.00e-04), 16008671 (p=7.01e-04), 16519819 (p=1.80e-03), 17703412 (p=2.10e-03), 19247692 (p=4.20e-03), 19479837 (p=4.30e-03), 20024904 (p=4.30e-03), 17301648 (p=4.70e-03), 17156146 (p=4.80e-03), 19843337 (p=5.40e-03),
comorbidity AND asthma AND rhinitis AND (eczema OR "atopic dermatitis")	32	3578	IL9	-	102	11	1.629e-16	16611254 (p=9.01e-04), 7666875 (p=1.90e-03), 17703412 (p=2.10e-03), 17083349 (p=2.20e-03), 24468256 (p=3.90e-03), 21371865 (p=4.20e-03), 20861646 (p=4.70e-03), 18349591 (p=7.80e-03), 17517104 (p=8.70e-03), 25112699 (p=9.00e-03),
comorbidity AND asthma AND rhinitis AND (eczema OR "atopic dermatitis")	33	3567	IL5	-	200	13	1.986e-16	24875149 (p=3.02e-04), 17362254 (p=4.11e-04), 15007355 (p=4.12e-04), 18849614 (p=7.02e-04), 22186238 (p=8.02e-04), 15805995 (p=1.60e-03), 17703412 (p=2.10e-03), 22541618 (p=2.30e-03), 19247692 (p=4.20e-03), 18996999 (p=4.20e-03),
comorbidity AND asthma AND rhinitis AND (eczema OR "atopic dermatitis")	34	4049	LTA	-	521	17	6.018e-16	17450233 (p=4.14e-04), 11591192 (p=6.02e-04), 18385169 (p=9.02e-04), 21271873 (p=9.02e-04), 12169181 (p=1.20e-03), 22464751 (p=1.60e-03), 17703412 (p=2.10e-03), 20395963 (p=2.90e-03), 14987295 (p=3.80e-03), 15976383 (p=3.90e-03),
comorbidity AND asthma AND rhinitis AND (eczema OR "atopic dermatitis")	35	10800	CYSLTR1	-	81	10	1.021e-15	19733299 (p=4.09e-04), 16846449 (p=4.14e-04), 17703412 (p=2.10e-03), 17558309 (p=3.20e-03), 23181793 (p=3.90e-03), 19080797 (p=4.60e-03), 17153879 (p=4.70e-03), 16776674 (p=4.70e-03), 19524426 (p=6.40e-03), 16630147 (p=9.50e-03),
comorbidity AND asthma AND rhinitis AND (eczema OR "atopic dermatitis")	36	348	APOE	-	3542	38	7.71e-15	21276236 (p=1.00e-03), 20697334 (p=2.20e-03), 15526312 (p=3.00e-03), 18728174 (p=3.00e-03), 18289451 (p=3.10e-03), 18243212 (p=3.40e-03), 15611352 (p=3.60e-03), 21550086 (p=3.60e-03), 19054180 (p=3.70e-03), 17911363 (p=3.90e-03),
comorbidity AND asthma AND rhinitis AND (eczema OR "atopic dermatitis")	37	6037	RNASE3	-	100	10	8.658e-15	19133919 (p=4.16e-04), 17362255 (p=5.00e-04), 21038779 (p=9.03e-04), 20534163 (p=1.00e-03), 23406588 (p=1.80e-03), 24814827 (p=3.80e-03), 12100059 (p=3.80e-03), 18716399 (p=6.80e-03), 16874959 (p=8.00e-03), 19692640 (p=8.90e-03),
comorbidity AND asthma AND rhinitis AND (eczema OR "atopic dermatitis")	38	3123	HLA-DRB1	-	2354	30	1.312e-14	19052351 (p=4.04e-04), 16802776 (p=4.17e-04), 17212706 (p=5.02e-04), 11378822 (p=6.02e-04), 17686102 (p=7.04e-04), 15784113 (p=1.00e-03), 12169181 (p=1.20e-03), 11167958 (p=1.40e-03), 12590981 (p=1.60e-03), 24962747 (p=1.90e-03),
comorbidity AND asthma AND rhinitis AND (eczema OR "atopic dermatitis")	39	5729	PTGDR	-	70	9	2.161e-14	19220773 (p=8.01e-04), 12119603 (p=1.50e-03), 23181793 (p=3.90e-03), 19247692 (p=4.20e-03), 21883277 (p=4.30e-03), 22182808 (p=4.50e-03), 19748656 (p=6.50e-03), 21199159 (p=7.50e-03), 19237393 (p=9.20e-03),
comorbidity AND asthma AND rhinitis AND (eczema OR "atopic dermatitis")	40	2205	FCER1A	-	111	10	2.347e-14	22222815 (p=4.20e-04), 17430357 (p=6.01e-04), 20028371 (p=7.02e-04), 18846228 (p=9.02e-04), 23725541 (p=1.00e-03), 12897750 (p=1.20e-03), 21209833 (p=1.80e-03), 17703412 (p=2.10e-03), 22075330 (p=2.20e-03), 21958156 (p=2.40e-03),
comorbidity AND asthma AND rhinitis AND (eczema OR "atopic dermatitis")	41	6352	CCL5	-	571	16	3.218e-14	23180368 (p=6.02e-04), 11197694 (p=6.02e-04), 11544456 (p=7.00e-04), 22444510 (p=1.60e-03), 12789231 (p=1.80e-03), 17703412 (p=2.10e-03), 17678722 (p=2.70e-03), 20395963 (p=2.90e-03), 15592421 (p=3.10e-03), 19099677 (p=3.20e-03),
comorbidity AND asthma AND rhinitis AND (eczema OR "atopic dermatitis")	42	54106	TLR9	-	500	15	6.9e-14	20085599 (p=4.08e-04), 18312481 (p=1.00e-03), 19096003 (p=1.40e-03), 21689850 (p=1.80e-03), 19639721 (p=1.80e-03), 17000223 (p=1.90e-03), 17703412 (p=2.10e-03), 19254290 (p=3.90e-03), 19247692 (p=4.20e-03), 24801457 (p=4.70e-03),
comorbidity AND asthma AND rhinitis AND (eczema OR "atopic dermatitis")	43	57628	DPP10	-	47	8	7.007e-14	20085599 (p=4.08e-04), 15829243 (p=8.01e-04), 19996348 (p=2.00e-03), 17703412 (p=2.10e-03), 17702965 (p=3.00e-03), 19247692 (p=4.20e-03), 19910030 (p=8.30e-03), 19237393 (p=9.20e-03),
comorbidity AND asthma AND rhinitis AND (eczema OR "atopic dermatitis")	44	627	BDNF	-	1343	22	6.967e-14	21723144 (p=4.06e-04), 17584309 (p=6.02e-04), 19895626 (p=7.01e-04), 18179783 (p=9.02e-04), 25649076 (p=1.50e-03), 20874832 (p=1.80e-03), 20573217 (p=2.70e-03), 19603419 (p=3.00e-03), 19295238 (p=3.70e-03), 23182421 (p=4.00e-03),
comorbidity AND asthma AND rhinitis AND (eczema OR "atopic dermatitis")	45	79068	FTO	-	505	15	7.422e-14	21443588 (p=1.20e-03), 21182554 (p=1.80e-03), 24348519 (p=2.00e-03), 19255736 (p=2.30e-03), 25110886 (p=3.70e-03), 20418190 (p=3.90e-03), 24040077 (p=4.30e-03), 20598163 (p=4.70e-03), 19153581 (p=4.80e-03), 25184161 (p=5.10e-03),
comorbidity AND asthma AND rhinitis AND (eczema OR "atopic dermatitis")	46	3458	IFNG	-	1525	22	7.277e-13	24167151 (p=4.00e-04), 15007355 (p=4.12e-04), 19552791 (p=5.00e-04), 19735490 (p=5.01e-04), 21798578 (p=5.03e-04), 19639725 (p=7.04e-04), 22698804 (p=9.03e-04), 20194818 (p=1.30e-03), 24995662 (p=1.60e-03), 15120189 (p=1.60e-03),
comorbidity AND asthma AND rhinitis AND (eczema OR "atopic dermatitis")	47	4842	NOS1	-	311	12	1.029e-12	16238787 (p=7.01e-04), 12911502 (p=1.80e-03), 15080837 (p=1.90e-03), 17703412 (p=2.10e-03), 20395963 (p=2.90e-03), 19247692 (p=4.20e-03), 19603529 (p=5.30e-03), 17690329 (p=7.90e-03), 21039601 (p=8.10e-03), 17536218 (p=8.30e-03),
comorbidity AND asthma AND rhinitis AND (eczema OR "atopic dermatitis")	48	7040	TGFB1	-	3084	31	1.317e-12	20085599 (p=4.08e-04), 19096005 (p=4.19e-04), 17333284 (p=4.20e-04), 15120189 (p=1.60e-03), 19046298 (p=1.80e-03), 17703412 (p=2.10e-03), 20599261 (p=2.80e-03), 20395963 (p=2.90e-03), 25119113 (p=3.10e-03), 18711258 (p=3.80e-03),
comorbidity AND asthma AND rhinitis AND (eczema OR "atopic dermatitis")	49	3606	IL18	-	758	16	1.836e-12	24167151 (p=4.00e-04), 16433859 (p=4.05e-04), 18093181 (p=6.01e-04), 21448661 (p=7.01e-04), 20418295 (p=9.01e-04), 22840759 (p=1.00e-03), 16759385 (p=1.60e-03), 24711060 (p=1.60e-03), 22686311 (p=1.90e-03), 17703412 (p=2.10e-03),
comorbidity AND asthma AND rhinitis AND (eczema OR "atopic dermatitis")	50	9415	FADS2	-	121	9	2.735e-12	21793953 (p=4.11e-04), 22629455 (p=1.80e-03), 16670158 (p=2.90e-03), 20045144 (p=4.70e-03), 18937842 (p=5.60e-03), 24934276 (p=6.10e-03), 20948998 (p=8.30e-03), 23667444 (p=9.10e-03), 18626191 (p=9.20e-03),
comorbidity AND asthma AND rhinitis AND (eczema OR "atopic dermatitis")	51	4128	MAOA	-	461	12	9.008e-11	23215821 (p=9.02e-04), 18188752 (p=1.80e-03), 23076524 (p=2.20e-03), 18075472 (p=4.20e-03), 18430257 (p=4.70e-03), 16856146 (p=5.30e-03), 17008143 (p=6.00e-03), 21099450 (p=6.50e-03), 16741202 (p=8.10e-03), 19357553 (p=8.30e-03),
comorbidity AND asthma AND rhinitis AND (eczema OR "atopic dermatitis")	52	3605	IL17A	-	744	14	1.629e-10	25562560 (p=2.08e-04), 20437253 (p=6.01e-04), 24141678 (p=1.10e-03), 19210369 (p=1.60e-03), 25223230 (p=1.80e-03), 17703412 (p=2.10e-03), 21245272 (p=4.20e-03), 21980832 (p=4.60e-03), 23957337 (p=4.80e-03), 22507625 (p=6.10e-03),
comorbidity AND asthma AND rhinitis AND (eczema OR "atopic dermatitis")	53	1401	CRP	-	1534	19	1.638e-10	21801245 (p=4.06e-04), 22554299 (p=6.01e-04), 18219765 (p=9.02e-04), 18704199 (p=3.00e-03), 23684514 (p=3.60e-03), 22533665 (p=4.20e-03), 24152229 (p=4.70e-03), 24558995 (p=4.70e-03), 25230678 (p=5.10e-03), 22556030 (p=6.00e-03),
comorbidity AND asthma AND rhinitis AND (eczema OR "atopic dermatitis")	54	26762	HAVCR1	-	128	8	2.296e-10	15007635 (p=4.14e-04), 17703412 (p=2.10e-03), 14637143 (p=2.90e-03), 16940744 (p=3.60e-03), 19247692 (p=4.20e-03), 22857392 (p=4.70e-03), 15867855 (p=6.00e-03), 20232767 (p=7.10e-03),
comorbidity AND asthma AND rhinitis AND (eczema OR "atopic dermatitis")	55	50943	FOXP3	-	648	13	3.193e-10	20028375 (p=5.02e-04), 19679154 (p=6.02e-04), 16551363 (p=2.00e-03), 17703412 (p=2.10e-03), 21107665 (p=2.70e-03), 20599261 (p=2.80e-03), 25113399 (p=3.90e-03), 20920773 (p=4.30e-03), 20654176 (p=4.60e-03), 16091206 (p=4.70e-03),
comorbidity AND asthma AND rhinitis AND (eczema OR "atopic dermatitis")	56	6915	TBXA2R	-	134	8	3.202e-10	12000493 (p=4.18e-04), 22017802 (p=1.20e-03), 15805995 (p=1.60e-03), 21070398 (p=1.60e-03), 20395963 (p=2.90e-03), 21734400 (p=3.60e-03), 19247692 (p=4.20e-03), 18031559 (p=4.20e-03),
comorbidity AND asthma AND rhinitis AND (eczema OR "atopic dermatitis")	57	1312	COMT	-	1432	18	3.229e-10	20868372 (p=1.60e-03), 12627475 (p=1.60e-03), 16679343 (p=1.60e-03), 21135332 (p=1.80e-03), 19946720 (p=2.80e-03), 16275815 (p=3.20e-03), 22416031 (p=3.70e-03), 17636223 (p=3.80e-03), 18663369 (p=4.30e-03), 22972758 (p=4.70e-03),
comorbidity AND asthma AND rhinitis AND (eczema OR "atopic dermatitis")	58	3568	IL5RA	-	80	7	3.904e-10	25523412 (p=4.05e-04), 24332579 (p=4.05e-04), 17362254 (p=4.11e-04), 20735756 (p=7.02e-04), 17703412 (p=2.10e-03), 19247692 (p=4.20e-03), 22560479 (p=6.90e-03),
comorbidity AND asthma AND rhinitis AND (eczema OR "atopic dermatitis")	59	4056	LTC4S	-	87	7	7.002e-10	19862937 (p=5.03e-04), 20395963 (p=2.90e-03), 19247692 (p=4.20e-03), 22722751 (p=4.20e-03), 19080797 (p=4.60e-03), 17153879 (p=4.70e-03), 19524426 (p=6.40e-03),
comorbidity AND asthma AND rhinitis AND (eczema OR "atopic dermatitis")	60	56946	C11orf30	-	47	6	1.108e-09	22036096 (p=4.18e-04), 23886662 (p=5.01e-04), 20503266 (p=1.80e-03), 25546184 (p=2.80e-03), 23817569 (p=3.00e-03), 23817571 (p=6.20e-03),
comorbidity AND asthma AND rhinitis AND (eczema OR "atopic dermatitis")	61	3952	LEP	-	1236	16	1.595e-09	19725899 (p=4.17e-04), 18221467 (p=4.18e-04), 24147569 (p=4.19e-04), 19191138 (p=1.60e-03), 23648099 (p=1.60e-03), 23561045 (p=2.00e-03), 21721375 (p=2.40e-03), 12364439 (p=3.70e-03), 22533665 (p=4.20e-03), 21631924 (p=6.50e-03),
comorbidity AND asthma AND rhinitis AND (eczema OR "atopic dermatitis")	62	1232	CCR3	-	168	8	1.769e-09	20726325 (p=4.12e-04), 20220260 (p=4.15e-04), 11307756 (p=9.02e-04), 17845580 (p=1.00e-03), 17135764 (p=1.90e-03), 17703412 (p=2.10e-03), 19247692 (p=4.20e-03), 20306659 (p=9.20e-03),
comorbidity AND asthma AND rhinitis AND (eczema OR "atopic dermatitis")	63	4524	MTHFR	-	2871	24	2.37e-09	18070159 (p=1.06e-04), 20456312 (p=4.04e-04), 20298385 (p=4.15e-04), 23692062 (p=6.03e-04), 19466593 (p=3.00e-03), 25598270 (p=3.60e-03), 11925474 (p=3.90e-03), 19247692 (p=4.20e-03), 14727014 (p=4.20e-03), 20088379 (p=4.30e-03),
comorbidity AND asthma AND rhinitis AND (eczema OR "atopic dermatitis")	64	6361	CCL17	-	107	7	2.817e-09	22017510 (p=4.19e-04), 24628072 (p=1.80e-03), 17703412 (p=2.10e-03), 14767451 (p=2.40e-03), 24698291 (p=6.50e-03), 18266834 (p=6.50e-03), 17517104 (p=8.70e-03),
comorbidity AND asthma AND rhinitis AND (eczema OR "atopic dermatitis")	65	4153	MBL2	-	641	12	2.896e-09	17014624 (p=4.20e-04), 22512728 (p=5.03e-04), 16178865 (p=9.01e-04), 17651383 (p=1.30e-03), 18700861 (p=1.60e-03), 17703412 (p=2.10e-03), 20298391 (p=2.30e-03), 25326706 (p=4.20e-03), 11255386 (p=4.70e-03), 22225939 (p=5.10e-03),
comorbidity AND asthma AND rhinitis AND (eczema OR "atopic dermatitis")	66	11251	PTGDR2	-	57	6	3.369e-09	19392992 (p=4.10e-04), 19290788 (p=2.10e-03), 17016057 (p=2.80e-03), 19247692 (p=4.20e-03), 22947041 (p=4.70e-03), 21762224 (p=9.10e-03),
comorbidity AND asthma AND rhinitis AND (eczema OR "atopic dermatitis")	67	2615	LRRC32	-	25	5	4.567e-09	22036096 (p=4.18e-04), 23886662 (p=5.01e-04), 23817569 (p=3.00e-03), 21907864 (p=3.10e-03), 23817571 (p=6.20e-03),
comorbidity AND asthma AND rhinitis AND (eczema OR "atopic dermatitis")	68	1636	ACE	-	2167	20	5.807e-09	22361338 (p=4.10e-04), 19484664 (p=4.19e-04), 21889830 (p=6.01e-04), 17014625 (p=8.00e-04), 22741763 (p=3.40e-03), 16769256 (p=3.60e-03), 19247692 (p=4.20e-03), 17032288 (p=4.30e-03), 23846034 (p=4.70e-03), 12899394 (p=4.70e-03),
comorbidity AND asthma AND rhinitis AND (eczema OR "atopic dermatitis")	69	383	ARG1	-	122	7	6.599e-09	16387594 (p=4.20e-04), 17703412 (p=2.10e-03), 19281908 (p=3.60e-03), 18478052 (p=4.20e-03), 25027824 (p=4.70e-03), 18617639 (p=4.70e-03), 21039601 (p=8.10e-03),
comorbidity AND asthma AND rhinitis AND (eczema OR "atopic dermatitis")	70	3557	IL1RN	-	869	13	8.175e-09	16409203 (p=1.50e-03), 17107994 (p=1.70e-03), 16519819 (p=1.80e-03), 17703412 (p=2.10e-03), 23014359 (p=3.90e-03), 19247692 (p=4.20e-03), 18926055 (p=4.70e-03), 12694213 (p=4.70e-03), 19431193 (p=6.10e-03), 16540751 (p=7.10e-03),
comorbidity AND asthma AND rhinitis AND (eczema OR "atopic dermatitis")	71	1493	CTLA4	-	877	13	8.969e-09	16445777 (p=4.16e-04), 14720259 (p=9.01e-04), 20016193 (p=1.20e-03), 21356099 (p=1.80e-03), 17703412 (p=2.10e-03), 12114354 (p=2.40e-03), 20395963 (p=2.90e-03), 19824886 (p=3.60e-03), 19247692 (p=4.20e-03), 25326706 (p=4.20e-03),
comorbidity AND asthma AND rhinitis AND (eczema OR "atopic dermatitis")	72	3117	HLA-DQA1	-	717	12	9.012e-09	19052351 (p=4.04e-04), 12890388 (p=6.01e-04), 15853903 (p=1.90e-03), 23817569 (p=3.00e-03), 18585974 (p=3.80e-03), 19895409 (p=4.20e-03), 11953202 (p=4.70e-03), 19858318 (p=6.00e-03), 23817571 (p=6.20e-03), 16540751 (p=7.10e-03),
comorbidity AND asthma AND rhinitis AND (eczema OR "atopic dermatitis")	73	10333	TLR6	-	129	7	9.235e-09	24445834 (p=4.16e-04), 16188043 (p=1.20e-03), 17703412 (p=2.10e-03), 23817569 (p=3.00e-03), 19254290 (p=3.90e-03), 19247692 (p=4.20e-03), 23817571 (p=6.20e-03),
comorbidity AND asthma AND rhinitis AND (eczema OR "atopic dermatitis")	74	3593	IL12B	-	436	10	9.581e-09	15007350 (p=4.12e-04), 15322986 (p=6.01e-04), 17703412 (p=2.10e-03), 20395963 (p=2.90e-03), 15356557 (p=3.00e-03), 24654313 (p=4.20e-03), 19247692 (p=4.20e-03), 12241719 (p=5.10e-03), 24957500 (p=9.00e-03), 17388919 (p=9.20e-03),
comorbidity AND asthma AND rhinitis AND (eczema OR "atopic dermatitis")	75	3562	IL3	-	130	7	9.489e-09	23953855 (p=4.06e-04), 17362254 (p=4.11e-04), 24684517 (p=4.17e-04), 23978640 (p=9.01e-04), 17703412 (p=2.10e-03), 19247692 (p=4.20e-03), 15372320 (p=4.60e-03),
comorbidity AND asthma AND rhinitis AND (eczema OR "atopic dermatitis")	76	4160	MC4R	-	324	9	1.181e-08	16507637 (p=1.60e-03), 16032553 (p=1.60e-03), 24348519 (p=2.00e-03), 18777518 (p=2.30e-03), 19255736 (p=2.30e-03), 24040077 (p=4.30e-03), 19153581 (p=4.80e-03), 12032748 (p=8.70e-03), 17492953 (p=9.20e-03),
comorbidity AND asthma AND rhinitis AND (eczema OR "atopic dermatitis")	77	9370	ADIPOQ	-	1655	17	1.179e-08	18442802 (p=4.10e-04), 19725899 (p=4.17e-04), 18221467 (p=4.18e-04), 24147569 (p=4.19e-04), 20188864 (p=7.04e-04), 20593932 (p=1.40e-03), 15292348 (p=2.30e-03), 15616802 (p=4.20e-03), 17119002 (p=4.20e-03), 18650840 (p=4.20e-03),
comorbidity AND asthma AND rhinitis AND (eczema OR "atopic dermatitis")	78	718	C3	-	458	10	1.449e-08	21801245 (p=4.06e-04), 18631248 (p=1.40e-03), 17703412 (p=2.10e-03), 20395963 (p=2.90e-03), 19247692 (p=4.20e-03), 18566738 (p=4.30e-03), 16355111 (p=5.30e-03), 15278436 (p=6.40e-03), 21816153 (p=7.00e-03), 18805911 (p=8.10e-03),
comorbidity AND asthma AND rhinitis AND (eczema OR "atopic dermatitis")	79	81793	TLR10	-	77	6	1.802e-08	17703412 (p=2.10e-03), 15201134 (p=2.70e-03), 23817569 (p=3.00e-03), 19254290 (p=3.90e-03), 19247692 (p=4.20e-03), 23817571 (p=6.20e-03),
comorbidity AND asthma AND rhinitis AND (eczema OR "atopic dermatitis")	80	30009	TBX21	-	146	7	2.006e-08	17949803 (p=4.20e-04), 22303482 (p=1.50e-03), 16179640 (p=1.90e-03), 17703412 (p=2.10e-03), 19362357 (p=4.50e-03), 21114556 (p=6.50e-03), 16874959 (p=8.00e-03),
comorbidity AND asthma AND rhinitis AND (eczema OR "atopic dermatitis")	81	1116	CHI3L1	-	244	8	2.579e-08	20538957 (p=8.01e-04), 19568425 (p=1.40e-03), 21530869 (p=2.30e-03), 25056157 (p=2.40e-03), 23397672 (p=4.60e-03), 24954373 (p=8.10e-03), 18403759 (p=8.40e-03), 25760838 (p=9.20e-03),
comorbidity AND asthma AND rhinitis AND (eczema OR "atopic dermatitis")	82	3351	HTR1B	-	153	7	2.714e-08	21906503 (p=1.60e-03), 15318027 (p=4.20e-03), 18937842 (p=5.60e-03), 19721846 (p=8.50e-03), 16443280 (p=9.00e-03), 12192616 (p=9.20e-03), 19506906 (p=9.20e-03),
comorbidity AND asthma AND rhinitis AND (eczema OR "atopic dermatitis")	83	4589	MUC7	-	41	5	5.13e-08	17703412 (p=2.10e-03), 19247692 (p=4.20e-03), 19820409 (p=5.10e-03), 11378823 (p=6.80e-03), 16759176 (p=9.20e-03),
comorbidity AND asthma AND rhinitis AND (eczema OR "atopic dermatitis")	84	1621	DBH	-	171	7	5.738e-08	16741944 (p=2.70e-03), 16389711 (p=3.60e-03), 18030083 (p=4.30e-03), 20006992 (p=4.70e-03), 23692268 (p=5.10e-03), 15796803 (p=8.10e-03), 19506906 (p=9.20e-03),
comorbidity AND asthma AND rhinitis AND (eczema OR "atopic dermatitis")	85	10392	NOD1	-	172	7	5.906e-08	16918516 (p=3.05e-04), 15990792 (p=6.02e-04), 20395963 (p=2.90e-03), 19247692 (p=4.20e-03), 15718249 (p=5.10e-03), 19843337 (p=5.40e-03), 17620097 (p=8.00e-03),
comorbidity AND asthma AND rhinitis AND (eczema OR "atopic dermatitis")	86	26191	PTPN22	-	408	9	7.624e-08	20016199 (p=1.60e-03), 19248096 (p=3.90e-03), 19895409 (p=4.20e-03), 17579671 (p=4.20e-03), 22722472 (p=4.70e-03), 20560812 (p=4.80e-03), 23936838 (p=5.00e-03), 23098231 (p=6.00e-03), 17553139 (p=7.60e-03),
comorbidity AND asthma AND rhinitis AND (eczema OR "atopic dermatitis")	87	675	BRCA2	-	1294	14	9.379e-08	16168130 (p=1.80e-03), 16622123 (p=1.90e-03), 16541324 (p=2.80e-03), 21149333 (p=3.60e-03), 16137751 (p=4.30e-03), 12473589 (p=4.70e-03), 15986445 (p=6.00e-03), 12611452 (p=6.50e-03), 20924075 (p=6.50e-03), 16118051 (p=8.00e-03),
comorbidity AND asthma AND rhinitis AND (eczema OR "atopic dermatitis")	88	3597	IL13RA1	-	49	5	1.223e-07	17392323 (p=9.02e-04), 17703412 (p=2.10e-03), 12522691 (p=2.70e-03), 21425907 (p=3.00e-03), 21913997 (p=6.50e-03),
comorbidity AND asthma AND rhinitis AND (eczema OR "atopic dermatitis")	89	10	NAT2	-	607	10	1.772e-07	23622008 (p=1.60e-03), 16533241 (p=2.00e-03), 19608015 (p=3.90e-03), 16886893 (p=4.00e-03), 19247692 (p=4.20e-03), 20088379 (p=4.30e-03), 22246524 (p=4.70e-03), 12492617 (p=5.10e-03), 22947533 (p=8.10e-03), 12360107 (p=8.10e-03),
comorbidity AND asthma AND rhinitis AND (eczema OR "atopic dermatitis")	90	5265	SERPINA1	-	457	9	1.916e-07	20298391 (p=2.30e-03), 22414631 (p=3.00e-03), 14616761 (p=4.70e-03), 17203708 (p=5.90e-03), 12612303 (p=6.30e-03), 22912729 (p=6.40e-03), 22971141 (p=7.30e-03), 17659342 (p=8.50e-03), 11295654 (p=9.00e-03),
comorbidity AND asthma AND rhinitis AND (eczema OR "atopic dermatitis")	91	3176	HNMT	-	57	5	2.578e-07	19025430 (p=4.14e-04), 17651147 (p=9.02e-04), 17703412 (p=2.10e-03), 19247692 (p=4.20e-03), 21138759 (p=6.70e-03),
comorbidity AND asthma AND rhinitis AND (eczema OR "atopic dermatitis")	92	4846	NOS3	-	1647	15	2.774e-07	16238787 (p=7.01e-04), 20955262 (p=7.04e-04), 18486767 (p=1.60e-03), 22304542 (p=1.60e-03), 22368302 (p=3.90e-03), 19247692 (p=4.20e-03), 19968769 (p=4.50e-03), 19603529 (p=5.30e-03), 12190658 (p=6.00e-03), 17243909 (p=6.50e-03),
comorbidity AND asthma AND rhinitis AND (eczema OR "atopic dermatitis")	93	4843	NOS2	-	641	10	2.803e-07	16703578 (p=7.04e-04), 17177683 (p=1.40e-03), 17703412 (p=2.10e-03), 11692109 (p=2.60e-03), 19996333 (p=3.20e-03), 22368302 (p=3.90e-03), 19247692 (p=4.20e-03), 18774388 (p=4.80e-03), 24315451 (p=7.10e-03), 21039601 (p=8.10e-03),
comorbidity AND asthma AND rhinitis AND (eczema OR "atopic dermatitis")	94	5097	PCDH1	-	20	4	2.99e-07	23050600 (p=4.11e-04), 23988763 (p=9.01e-04), 21929597 (p=4.20e-03), 19729670 (p=8.60e-03),
comorbidity AND asthma AND rhinitis AND (eczema OR "atopic dermatitis")	95	3992	FADS1	-	129	6	3.409e-07	21793953 (p=4.11e-04), 22629455 (p=1.80e-03), 16670158 (p=2.90e-03), 20045144 (p=4.70e-03), 20948998 (p=8.30e-03), 18626191 (p=9.20e-03),
comorbidity AND asthma AND rhinitis AND (eczema OR "atopic dermatitis")	96	3659	IRF1	-	242	7	5.473e-07	18079498 (p=4.05e-04), 19295429 (p=1.60e-03), 17703412 (p=2.10e-03), 19247692 (p=4.20e-03), 11069564 (p=4.50e-03), 16961714 (p=4.70e-03), 24824216 (p=9.20e-03),
comorbidity AND asthma AND rhinitis AND (eczema OR "atopic dermatitis")	97	2625	GATA3	-	243	7	5.571e-07	18037162 (p=4.18e-04), 18410415 (p=5.01e-04), 17703412 (p=2.10e-03), 15637551 (p=2.70e-03), 23817569 (p=3.00e-03), 19247692 (p=4.20e-03), 21114556 (p=6.50e-03),
comorbidity AND asthma AND rhinitis AND (eczema OR "atopic dermatitis")	98	117156	SCGB3A2	-	24	4	6.27e-07	21410962 (p=2.30e-03), 19247692 (p=4.20e-03), 21170691 (p=5.30e-03), 18201431 (p=9.20e-03),
comorbidity AND asthma AND rhinitis AND (eczema OR "atopic dermatitis")	99	1234	CCR5	-	1345	13	8.207e-07	21465943 (p=4.15e-04), 20220260 (p=4.15e-04), 12612298 (p=4.16e-04), 18972295 (p=1.40e-03), 12023175 (p=1.60e-03), 17135764 (p=1.90e-03), 17703412 (p=2.10e-03), 16855620 (p=3.90e-03), 25891238 (p=3.90e-03), 19247692 (p=4.20e-03),
comorbidity AND asthma AND rhinitis AND (eczema OR "atopic dermatitis")	100	8809	IL18R1	-	73	5	8.29e-07	20860503 (p=1.90e-03), 23028483 (p=2.00e-03), 17703412 (p=2.10e-03), 23817571 (p=6.20e-03), 19910030 (p=8.30e-03),
comorbidity AND asthma AND rhinitis AND (eczema OR "atopic dermatitis")	101	7096	TLR1	-	163	6	1.293e-06	24445834 (p=4.16e-04), 17703412 (p=2.10e-03), 23817569 (p=3.00e-03), 19254290 (p=3.90e-03), 19627277 (p=5.10e-03), 23817571 (p=6.20e-03),
comorbidity AND asthma AND rhinitis AND (eczema OR "atopic dermatitis")	102	3552	IL1A	-	793	10	1.771e-06	12752325 (p=5.03e-04), 12209090 (p=2.00e-03), 17703412 (p=2.10e-03), 18416756 (p=2.40e-03), 19247692 (p=4.20e-03), 15974847 (p=4.70e-03), 19431193 (p=6.10e-03), 23527710 (p=6.50e-03), 15007345 (p=6.70e-03), 17388919 (p=9.20e-03),
comorbidity AND asthma AND rhinitis AND (eczema OR "atopic dermatitis")	103	6367	CCL22	-	92	5	2.591e-06	23106659 (p=4.13e-04), 17703412 (p=2.10e-03), 19175890 (p=5.80e-03), 18266834 (p=6.50e-03), 17517104 (p=8.70e-03),
comorbidity AND asthma AND rhinitis AND (eczema OR "atopic dermatitis")	104	3142	HLX	-	36	4	3.245e-06	22303482 (p=1.50e-03), 19295429 (p=1.60e-03), 19038437 (p=1.60e-03), 19362357 (p=4.50e-03),
comorbidity AND asthma AND rhinitis AND (eczema OR "atopic dermatitis")	105	386653	IL31	-	36	4	3.214e-06	17030248 (p=2.70e-03), 21294778 (p=3.00e-03), 22017185 (p=8.00e-03), 25270263 (p=9.00e-03),
comorbidity AND asthma AND rhinitis AND (eczema OR "atopic dermatitis")	106	2638	GC	-	195	6	3.551e-06	24447085 (p=1.60e-03), 14987123 (p=4.00e-03), 22673963 (p=5.10e-03), 24007655 (p=6.70e-03), 19852851 (p=6.70e-03), 24646907 (p=7.10e-03),
comorbidity AND asthma AND rhinitis AND (eczema OR "atopic dermatitis")	107	5054	SERPINE1	-	1115	11	4.879e-06	22361338 (p=4.10e-04), 19063817 (p=6.02e-04), 16409202 (p=1.60e-03), 22578058 (p=1.60e-03), 21478212 (p=2.00e-03), 16789641 (p=3.60e-03), 19247692 (p=4.20e-03), 16896567 (p=4.70e-03), 18714537 (p=7.20e-03), 11972486 (p=8.50e-03),
comorbidity AND asthma AND rhinitis AND (eczema OR "atopic dermatitis")	108	3553	IL1B	-	2138	15	5.338e-06	21440944 (p=1.80e-03), 19096964 (p=2.00e-03), 17703412 (p=2.10e-03), 18416756 (p=2.40e-03), 24654313 (p=4.20e-03), 19247692 (p=4.20e-03), 24853301 (p=4.30e-03), 18926055 (p=4.70e-03), 15974847 (p=4.70e-03), 12694213 (p=4.70e-03),
comorbidity AND asthma AND rhinitis AND (eczema OR "atopic dermatitis")	109	10850	CCL27	-	41	4	5.3e-06	22017510 (p=4.19e-04), 17703412 (p=2.10e-03), 14767451 (p=2.40e-03), 18266834 (p=6.50e-03),
comorbidity AND asthma AND rhinitis AND (eczema OR "atopic dermatitis")	110	121278	TPH2	-	212	6	5.59e-06	21418060 (p=3.90e-03), 23360517 (p=4.20e-03), 23461725 (p=5.10e-03), 18937842 (p=5.60e-03), 20921119 (p=5.70e-03), 19506906 (p=9.20e-03),
comorbidity AND asthma AND rhinitis AND (eczema OR "atopic dermatitis")	111	672	BRCA1	-	2159	15	5.816e-06	16168130 (p=1.80e-03), 16622123 (p=1.90e-03), 16541324 (p=2.80e-03), 21149333 (p=3.60e-03), 16137751 (p=4.30e-03), 12473589 (p=4.70e-03), 15986445 (p=6.00e-03), 8968716 (p=6.40e-03), 12611452 (p=6.50e-03), 20924075 (p=6.50e-03),
comorbidity AND asthma AND rhinitis AND (eczema OR "atopic dermatitis")	112	1813	DRD2	-	936	10	7.054e-06	16679343 (p=1.60e-03), 22531292 (p=1.70e-03), 18188752 (p=1.80e-03), 17069991 (p=2.50e-03), 14643564 (p=3.70e-03), 18030083 (p=4.30e-03), 19125104 (p=4.70e-03), 11331109 (p=6.50e-03), 24283216 (p=9.20e-03), 19506906 (p=9.20e-03),
comorbidity AND asthma AND rhinitis AND (eczema OR "atopic dermatitis")	113	7421	VDR	-	1435	12	8.481e-06	15282200 (p=9.01e-04), 17703412 (p=2.10e-03), 19247692 (p=4.20e-03), 15651992 (p=4.20e-03), 22681928 (p=4.60e-03), 19094076 (p=5.90e-03), 24007655 (p=6.70e-03), 15282199 (p=7.10e-03), 22130867 (p=8.10e-03), 23975061 (p=8.10e-03),
comorbidity AND asthma AND rhinitis AND (eczema OR "atopic dermatitis")	114	3603	IL16	-	120	5	8.842e-06	17703412 (p=2.10e-03), 17303923 (p=3.70e-03), 16387589 (p=6.50e-03), 15784111 (p=6.50e-03), 14657881 (p=6.50e-03),
comorbidity AND asthma AND rhinitis AND (eczema OR "atopic dermatitis")	115	2207	FCER1G	-	49	4	1.044e-05	17430357 (p=6.01e-04), 20028371 (p=7.02e-04), 11980568 (p=8.02e-04), 12836193 (p=3.90e-03),
comorbidity AND asthma AND rhinitis AND (eczema OR "atopic dermatitis")	116	256076	COL6A5	-	12	3	1.231e-05	21353297 (p=4.08e-04), 17850181 (p=9.01e-04), 24348519 (p=2.00e-03),
comorbidity AND asthma AND rhinitis AND (eczema OR "atopic dermatitis")	117	729230	CCR2	-	415	7	1.679e-05	19082218 (p=4.03e-04), 20220260 (p=4.15e-04), 17135764 (p=1.90e-03), 17703412 (p=2.10e-03), 18615095 (p=2.30e-03), 23454776 (p=4.30e-03), 19055601 (p=6.00e-03),
comorbidity AND asthma AND rhinitis AND (eczema OR "atopic dermatitis")	118	6347	CCL2	-	1074	10	2.222e-05	15005768 (p=4.13e-04), 23180368 (p=6.02e-04), 11544456 (p=7.00e-04), 19496969 (p=9.03e-04), 17703412 (p=2.10e-03), 18615095 (p=2.30e-03), 19247692 (p=4.20e-03), 23454776 (p=4.30e-03), 19055601 (p=6.00e-03), 20861640 (p=8.40e-03),
comorbidity AND asthma AND rhinitis AND (eczema OR "atopic dermatitis")	119	1672	DEFB1	-	160	5	3.518e-05	22059360 (p=1.60e-03), 16435024 (p=1.60e-03), 15696078 (p=2.50e-03), 20618470 (p=4.70e-03), 18817538 (p=6.50e-03),
comorbidity AND asthma AND rhinitis AND (eczema OR "atopic dermatitis")	120	6356	CCL11	-	165	5	4.057e-05	23180368 (p=6.02e-04), 17845580 (p=1.00e-03), 17703412 (p=2.10e-03), 19247692 (p=4.20e-03), 20306659 (p=9.20e-03),
comorbidity AND asthma AND rhinitis AND (eczema OR "atopic dermatitis")	121	84868	HAVCR2	-	166	5	4.146e-05	16159638 (p=4.19e-04), 17703412 (p=2.10e-03), 16940744 (p=3.60e-03), 19566956 (p=4.20e-03), 15867855 (p=6.00e-03),
comorbidity AND asthma AND rhinitis AND (eczema OR "atopic dermatitis")	122	5444	PON1	-	915	9	4.27e-05	23406590 (p=2.20e-03), 19022366 (p=2.70e-03), 20221876 (p=3.20e-03), 19646734 (p=5.10e-03), 16008163 (p=5.40e-03), 24834831 (p=5.80e-03), 15270786 (p=6.50e-03), 19371607 (p=6.90e-03), 20227490 (p=9.20e-03),
comorbidity AND asthma AND rhinitis AND (eczema OR "atopic dermatitis")	123	114548	NLRP3	-	309	6	4.448e-05	17178985 (p=2.70e-03), 22935299 (p=4.80e-03), 21109514 (p=5.40e-03), 23440695 (p=8.00e-03), 17620097 (p=8.00e-03), 19767079 (p=9.90e-03),
comorbidity AND asthma AND rhinitis AND (eczema OR "atopic dermatitis")	124	1138	CHRNA5	-	178	5	5.696e-05	22017462 (p=4.11e-04), 22837378 (p=6.20e-03), 22241830 (p=6.50e-03), 18618000 (p=7.60e-03), 19300482 (p=8.70e-03),
comorbidity AND asthma AND rhinitis AND (eczema OR "atopic dermatitis")	125	64478	CSMD1	-	76	4	5.695e-05	23453885 (p=1.60e-03), 22424883 (p=2.40e-03), 25456346 (p=5.70e-03), 23472165 (p=6.40e-03),
comorbidity AND asthma AND rhinitis AND (eczema OR "atopic dermatitis")	126	1136	CHRNA3	-	182	5	6.249e-05	22017462 (p=4.11e-04), 22837378 (p=6.20e-03), 22241830 (p=6.50e-03), 18618000 (p=7.60e-03), 19300482 (p=8.70e-03),
comorbidity AND asthma AND rhinitis AND (eczema OR "atopic dermatitis")	127	3600	IL15	-	344	6	7.961e-05	16333313 (p=4.16e-04), 16629787 (p=7.03e-04), 17703412 (p=2.10e-03), 15131572 (p=3.20e-03), 19133918 (p=3.70e-03), 19247692 (p=4.20e-03),
comorbidity AND asthma AND rhinitis AND (eczema OR "atopic dermatitis")	128	1080	CFTR	-	1261	10	8.052e-05	15781764 (p=1.60e-03), 20298391 (p=2.30e-03), 12881616 (p=4.10e-03), 19247692 (p=4.20e-03), 16678395 (p=4.70e-03), 15463854 (p=6.10e-03), 11243954 (p=6.40e-03), 15486385 (p=7.50e-03), 23378603 (p=8.40e-03), 11802245 (p=9.60e-03),
comorbidity AND asthma AND rhinitis AND (eczema OR "atopic dermatitis")	129	150	ADRA2A	-	194	5	8.338e-05	12815749 (p=2.40e-03), 16806103 (p=2.90e-03), 19922756 (p=5.10e-03), 19088492 (p=7.30e-03), 19506906 (p=9.20e-03),
comorbidity AND asthma AND rhinitis AND (eczema OR "atopic dermatitis")	130	7941	PLA2G7	-	196	5	8.699e-05	23413990 (p=3.90e-03), 19247692 (p=4.20e-03), 23103135 (p=4.40e-03), 10733466 (p=4.50e-03), 22338104 (p=4.70e-03),
comorbidity AND asthma AND rhinitis AND (eczema OR "atopic dermatitis")	131	3077	HFE	-	798	8	0.0001176	16102632 (p=2.80e-03), 20145272 (p=4.20e-03), 11812557 (p=4.70e-03), 11960577 (p=6.10e-03), 14966054 (p=6.60e-03), 19554541 (p=8.10e-03), 23188073 (p=8.30e-03), 20583211 (p=8.90e-03),
comorbidity AND asthma AND rhinitis AND (eczema OR "atopic dermatitis")	132	3594	IL12RB1	-	93	4	0.0001211	21689850 (p=1.80e-03), 17703412 (p=2.10e-03), 16159888 (p=3.10e-03), 19247692 (p=4.20e-03),
comorbidity AND asthma AND rhinitis AND (eczema OR "atopic dermatitis")	133	3356	HTR2A	-	589	7	0.0001442	17938636 (p=4.40e-03), 12475403 (p=4.70e-03), 20006992 (p=4.70e-03), 18937842 (p=5.60e-03), 16443280 (p=9.00e-03), 16958038 (p=9.10e-03), 19506906 (p=9.20e-03),
comorbidity AND asthma AND rhinitis AND (eczema OR "atopic dermatitis")	134	1215	CMA1	-	100	4	0.0001592	15248847 (p=5.02e-04), 20736038 (p=9.03e-04), 18973102 (p=2.00e-03), 16134991 (p=3.90e-03),
comorbidity AND asthma AND rhinitis AND (eczema OR "atopic dermatitis")	135	1816	DRD5	-	101	4	0.0001645	18563476 (p=2.40e-03), 16389711 (p=3.60e-03), 20006992 (p=4.70e-03), 19506906 (p=9.20e-03),
comorbidity AND asthma AND rhinitis AND (eczema OR "atopic dermatitis")	136	3569	IL6	-	3314	16	0.0001633	16344268 (p=4.16e-04), 16759385 (p=1.60e-03), 15120189 (p=1.60e-03), 17703412 (p=2.10e-03), 20599261 (p=2.80e-03), 12694213 (p=4.70e-03), 12846758 (p=6.00e-03), 16540751 (p=7.10e-03), 23159256 (p=7.10e-03), 18399716 (p=7.60e-03),
comorbidity AND asthma AND rhinitis AND (eczema OR "atopic dermatitis")	137	1812	DRD1	-	227	5	0.0001685	17679637 (p=2.70e-03), 18937842 (p=5.60e-03), 18023044 (p=6.40e-03), 22404661 (p=7.60e-03), 19695183 (p=9.50e-03),
comorbidity AND asthma AND rhinitis AND (eczema OR "atopic dermatitis")	138	2875	GPT	-	103	4	0.0001741	23522007 (p=9.04e-04), 23403445 (p=3.00e-03), 21720553 (p=5.10e-03), 23880909 (p=6.20e-03),
comorbidity AND asthma AND rhinitis AND (eczema OR "atopic dermatitis")	139	3075	CFH	-	614	7	0.00018	16519819 (p=1.80e-03), 18704199 (p=3.00e-03), 25880396 (p=4.30e-03), 18164066 (p=4.30e-03), 21816153 (p=7.00e-03), 18538409 (p=7.60e-03), 20605213 (p=9.20e-03),
comorbidity AND asthma AND rhinitis AND (eczema OR "atopic dermatitis")	140	240	ALOX5	-	231	5	0.0001794	16364163 (p=1.60e-03), 17703412 (p=2.10e-03), 19247692 (p=4.20e-03), 19524426 (p=6.40e-03), 23600541 (p=8.70e-03),
comorbidity AND asthma AND rhinitis AND (eczema OR "atopic dermatitis")	141	3576	CXCL8	-	1713	11	0.0001879	19496969 (p=9.03e-04), 20194818 (p=1.30e-03), 17703412 (p=2.10e-03), 18416756 (p=2.40e-03), 15356575 (p=2.70e-03), 19247692 (p=4.20e-03), 25326706 (p=4.20e-03), 24102466 (p=4.30e-03), 24853301 (p=4.30e-03), 19852851 (p=6.70e-03),
comorbidity AND asthma AND rhinitis AND (eczema OR "atopic dermatitis")	142	56729	RETN	-	410	6	0.0001926	18221467 (p=4.18e-04), 23648099 (p=1.60e-03), 23685419 (p=2.70e-03), 20093199 (p=4.70e-03), 22886618 (p=6.40e-03), 16313475 (p=6.50e-03),
comorbidity AND asthma AND rhinitis AND (eczema OR "atopic dermatitis")	143	91937	TIMD4	-	31	3	0.0002014	16940744 (p=3.60e-03), 19392790 (p=4.70e-03), 24204099 (p=4.80e-03),
comorbidity AND asthma AND rhinitis AND (eczema OR "atopic dermatitis")	144	27159	CHIA	-	33	3	0.0002425	20538957 (p=8.01e-04), 17703412 (p=2.10e-03), 19247692 (p=4.20e-03),
comorbidity AND asthma AND rhinitis AND (eczema OR "atopic dermatitis")	145	6095	RORA	-	115	4	0.0002565	24142618 (p=1.80e-03), 20860503 (p=1.90e-03), 22424883 (p=2.40e-03), 23565190 (p=6.00e-03),
comorbidity AND asthma AND rhinitis AND (eczema OR "atopic dermatitis")	146	51135	IRAK4	-	117	4	0.0002727	22932140 (p=1.40e-03), 21738793 (p=1.60e-03), 17703412 (p=2.10e-03), 19254290 (p=3.90e-03),
comorbidity AND asthma AND rhinitis AND (eczema OR "atopic dermatitis")	147	241	ALOX5AP	-	122	4	0.0003197	18547289 (p=6.03e-04), 22537113 (p=2.90e-03), 19524426 (p=6.40e-03), 20067482 (p=7.60e-03),
comorbidity AND asthma AND rhinitis AND (eczema OR "atopic dermatitis")	148	29851	ICOS	-	124	4	0.0003386	19175887 (p=2.07e-04), 21356099 (p=1.80e-03), 19824886 (p=3.60e-03), 19247692 (p=4.20e-03),
comorbidity AND asthma AND rhinitis AND (eczema OR "atopic dermatitis")	149	149233	IL23R	-	267	5	0.0003388	17703412 (p=2.10e-03), 20024904 (p=4.30e-03), 21206965 (p=8.70e-03), 24957500 (p=9.00e-03), 17618837 (p=9.00e-03),
comorbidity AND asthma AND rhinitis AND (eczema OR "atopic dermatitis")	150	55054	ATG16L1	-	129	4	0.0003906	20024904 (p=4.30e-03), 18366306 (p=4.70e-03), 18088053 (p=6.00e-03), 21206965 (p=8.70e-03),
comorbidity AND asthma AND rhinitis AND (eczema OR "atopic dermatitis")	151	64806	IL25	-	42	3	0.0004837	20492545 (p=2.70e-03), 23657503 (p=3.90e-03), 23957336 (p=7.00e-03),
comorbidity AND asthma AND rhinitis AND (eczema OR "atopic dermatitis")	152	3581	IL9R	-	46	3	0.0006337	17703412 (p=2.10e-03), 17083349 (p=2.20e-03), 21371865 (p=4.20e-03),
comorbidity AND asthma AND rhinitis AND (eczema OR "atopic dermatitis")	153	940	CD28	-	308	5	0.0006531	21356099 (p=1.80e-03), 17703412 (p=2.10e-03), 19824886 (p=3.60e-03), 19852851 (p=6.70e-03), 19735272 (p=9.20e-03),
comorbidity AND asthma AND rhinitis AND (eczema OR "atopic dermatitis")	154	4318	MMP9	-	2011	11	0.0006837	22237587 (p=4.09e-04), 20181264 (p=5.00e-04), 23639553 (p=1.90e-03), 18391843 (p=2.70e-03), 20395963 (p=2.90e-03), 22391064 (p=3.10e-03), 19958602 (p=6.40e-03), 18571010 (p=7.60e-03), 20305574 (p=8.30e-03), 18451255 (p=8.40e-03),
comorbidity AND asthma AND rhinitis AND (eczema OR "atopic dermatitis")	155	335	APOA1	-	774	7	0.0006941	19218819 (p=4.17e-04), 22674204 (p=9.04e-04), 14567398 (p=3.20e-03), 23889245 (p=3.80e-03), 22287661 (p=4.20e-03), 12011770 (p=7.50e-03), 20368199 (p=8.70e-03),
comorbidity AND asthma AND rhinitis AND (eczema OR "atopic dermatitis")	156	125	ADH1B	-	316	5	0.0007236	23806636 (p=4.11e-04), 20357489 (p=4.12e-04), 25410943 (p=8.30e-03), 23550892 (p=8.50e-03), 16520888 (p=9.20e-03),
comorbidity AND asthma AND rhinitis AND (eczema OR "atopic dermatitis")	157	81704	DOCK8	-	50	3	0.0007901	24898675 (p=4.01e-04), 21931011 (p=1.80e-03), 22534316 (p=5.10e-03),
comorbidity AND asthma AND rhinitis AND (eczema OR "atopic dermatitis")	158	6346	CCL1	-	54	3	0.0009908	17845580 (p=1.00e-03), 15814739 (p=1.80e-03), 17703412 (p=2.10e-03),
comorbidity AND asthma AND rhinitis AND (eczema OR "atopic dermatitis")	159	11213	IRAK3	-	55	3	0.001041	19013233 (p=3.60e-03), 17503328 (p=4.00e-03), 16432636 (p=8.70e-03),
comorbidity AND asthma AND rhinitis AND (eczema OR "atopic dermatitis")	160	384	ARG2	-	59	3	0.001278	16387594 (p=4.20e-04), 19281908 (p=3.60e-03), 21039601 (p=8.10e-03),
comorbidity AND asthma AND rhinitis AND (eczema OR "atopic dermatitis")	161	6530	SLC6A2	-	178	4	0.001285	23185385 (p=4.70e-03), 18081710 (p=8.50e-03), 19721846 (p=8.50e-03), 19506906 (p=9.20e-03),
comorbidity AND asthma AND rhinitis AND (eczema OR "atopic dermatitis")	162	169026	SLC30A8	-	178	4	0.001278	24423473 (p=5.10e-03), 18598350 (p=6.10e-03), 20836749 (p=8.70e-03), 18984664 (p=9.80e-03),
comorbidity AND asthma AND rhinitis AND (eczema OR "atopic dermatitis")	163	2938	GSTA1	-	182	4	0.001384	24471578 (p=2.70e-03), 22040239 (p=4.70e-03), 20374258 (p=8.70e-03), 23570881 (p=9.20e-03),
comorbidity AND asthma AND rhinitis AND (eczema OR "atopic dermatitis")	164	119391	GSTO2	-	61	3	0.001378	24471578 (p=2.70e-03), 22040239 (p=4.70e-03), 20374258 (p=8.70e-03),
comorbidity AND asthma AND rhinitis AND (eczema OR "atopic dermatitis")	165	727	C5	-	186	4	0.001489	20143644 (p=3.06e-04), 17703412 (p=2.10e-03), 19247692 (p=4.20e-03), 15278436 (p=6.40e-03),
comorbidity AND asthma AND rhinitis AND (eczema OR "atopic dermatitis")	166	6775	STAT4	-	187	4	0.00151	17703412 (p=2.10e-03), 15637551 (p=2.70e-03), 15744455 (p=3.80e-03), 17532201 (p=6.70e-03),
comorbidity AND asthma AND rhinitis AND (eczema OR "atopic dermatitis")	167	6441	SFTPD	-	191	4	0.001631	16426259 (p=1.80e-03), 17703412 (p=2.10e-03), 18355911 (p=3.20e-03), 19493231 (p=3.20e-03),
comorbidity AND asthma AND rhinitis AND (eczema OR "atopic dermatitis")	168	7046	TGFBR1	-	381	5	0.001626	17703412 (p=2.10e-03), 20599261 (p=2.80e-03), 18711258 (p=3.80e-03), 24333532 (p=4.20e-03), 14597484 (p=9.20e-03),
comorbidity AND asthma AND rhinitis AND (eczema OR "atopic dermatitis")	169	942	CD86	-	194	4	0.001711	17513529 (p=5.01e-04), 17703412 (p=2.10e-03), 19852851 (p=6.70e-03), 19735272 (p=9.20e-03),
comorbidity AND asthma AND rhinitis AND (eczema OR "atopic dermatitis")	170	4026	LPP	-	69	3	0.001926	22075330 (p=2.20e-03), 23817569 (p=3.00e-03), 23817571 (p=6.20e-03),
comorbidity AND asthma AND rhinitis AND (eczema OR "atopic dermatitis")	171	83852	SETDB2	-	10	2	0.00214	20085599 (p=4.08e-04), 12754510 (p=1.60e-03),
comorbidity AND asthma AND rhinitis AND (eczema OR "atopic dermatitis")	172	1394	CRHR1	-	209	4	0.002244	22748421 (p=2.70e-03), 19247692 (p=4.20e-03), 17597588 (p=4.70e-03), 19607758 (p=7.80e-03),
comorbidity AND asthma AND rhinitis AND (eczema OR "atopic dermatitis")	173	1906	EDN1	-	669	6	0.002352	11831453 (p=1.60e-03), 11991554 (p=1.60e-03), 17703412 (p=2.10e-03), 19730395 (p=2.90e-03), 19247692 (p=4.20e-03), 18260253 (p=7.40e-03),
comorbidity AND asthma AND rhinitis AND (eczema OR "atopic dermatitis")	174	3383	ICAM1	-	975	7	0.00254	17598660 (p=9.02e-04), 25003170 (p=1.40e-03), 17703412 (p=2.10e-03), 20362293 (p=5.00e-03), 15696921 (p=8.50e-03), 11354638 (p=8.90e-03), 24393359 (p=9.10e-03),
comorbidity AND asthma AND rhinitis AND (eczema OR "atopic dermatitis")	175	3558	IL2	-	692	6	0.002789	16333313 (p=4.16e-04), 22036096 (p=4.18e-04), 17703412 (p=2.10e-03), 20599261 (p=2.80e-03), 23817571 (p=6.20e-03), 11354638 (p=8.90e-03),
comorbidity AND asthma AND rhinitis AND (eczema OR "atopic dermatitis")	176	7177	TPSAB1	-	80	3	0.002896	24372627 (p=4.20e-04), 24054365 (p=5.01e-04), 23018683 (p=2.90e-03),
comorbidity AND asthma AND rhinitis AND (eczema OR "atopic dermatitis")	177	3106	HLA-B	-	1685	9	0.002923	17487448 (p=8.01e-04), 15853903 (p=1.90e-03), 18785306 (p=2.40e-03), 20868574 (p=3.60e-03), 23356447 (p=6.10e-03), 25234663 (p=6.20e-03), 23817571 (p=6.20e-03), 12969506 (p=7.60e-03), 23020308 (p=8.30e-03),
comorbidity AND asthma AND rhinitis AND (eczema OR "atopic dermatitis")	178	6362	CCL18	-	85	3	0.00343	15494534 (p=1.60e-03), 17703412 (p=2.10e-03), 21539615 (p=6.00e-03),
comorbidity AND asthma AND rhinitis AND (eczema OR "atopic dermatitis")	179	1728	NQO1	-	466	5	0.003895	20526719 (p=1.60e-03), 19027876 (p=5.10e-03), 20824655 (p=6.00e-03), 16520888 (p=9.20e-03), 20049212 (p=9.20e-03),
comorbidity AND asthma AND rhinitis AND (eczema OR "atopic dermatitis")	180	7422	VEGFA	-	3387	13	0.004191	24152156 (p=5.01e-04), 17651148 (p=1.60e-03), 22461367 (p=1.70e-03), 19196819 (p=3.20e-03), 18261732 (p=3.90e-03), 25255852 (p=4.00e-03), 25326706 (p=4.20e-03), 24102466 (p=4.30e-03), 23828162 (p=5.10e-03), 25109477 (p=5.60e-03),
comorbidity AND asthma AND rhinitis AND (eczema OR "atopic dermatitis")	181	1118	CHIT1	-	92	3	0.004268	20538957 (p=8.01e-04), 17693102 (p=9.04e-04), 23706714 (p=5.60e-03),
comorbidity AND asthma AND rhinitis AND (eczema OR "atopic dermatitis")	182	7850	IL1R2	-	94	3	0.004525	23453885 (p=1.60e-03), 17703412 (p=2.10e-03), 19489917 (p=3.60e-03),
comorbidity AND asthma AND rhinitis AND (eczema OR "atopic dermatitis")	183	3554	IL1R1	-	257	4	0.00467	21281963 (p=4.20e-04), 17703412 (p=2.10e-03), 19431193 (p=6.10e-03), 18810365 (p=9.20e-03),
comorbidity AND asthma AND rhinitis AND (eczema OR "atopic dermatitis")	184	4157	MC1R	-	258	4	0.004715	15998953 (p=4.20e-03), 16567973 (p=4.30e-03), 22095472 (p=6.40e-03), 20301115 (p=9.20e-03),
comorbidity AND asthma AND rhinitis AND (eczema OR "atopic dermatitis")	185	10452	TOMM40	-	98	3	0.005038	24770881 (p=6.50e-03), 18823527 (p=6.80e-03), 24508314 (p=8.70e-03),
comorbidity AND asthma AND rhinitis AND (eczema OR "atopic dermatitis")	186	4803	NGF	-	264	4	0.005092	18179783 (p=9.02e-04), 19076929 (p=1.90e-03), 17703412 (p=2.10e-03), 18763222 (p=4.80e-03),
comorbidity AND asthma AND rhinitis AND (eczema OR "atopic dermatitis")	187	132612	ADAD1	-	17	2	0.005893	23817569 (p=3.00e-03), 23817571 (p=6.20e-03),
comorbidity AND asthma AND rhinitis AND (eczema OR "atopic dermatitis")	188	1143	CHRNB4	-	108	3	0.00661	22241830 (p=6.50e-03), 18618000 (p=7.60e-03), 22438940 (p=9.10e-03),
comorbidity AND asthma AND rhinitis AND (eczema OR "atopic dermatitis")	189	7292	TNFSF4	-	111	3	0.00713	21820713 (p=7.01e-04), 21781408 (p=4.30e-03), 18060034 (p=8.20e-03),
comorbidity AND asthma AND rhinitis AND (eczema OR "atopic dermatitis")	190	3570	IL6R	-	291	4	0.007221	17703412 (p=2.10e-03), 20599261 (p=2.80e-03), 21907864 (p=3.10e-03), 23582566 (p=5.00e-03),
comorbidity AND asthma AND rhinitis AND (eczema OR "atopic dermatitis")	191	284110	GSDMA	-	20	2	0.008046	20860503 (p=1.90e-03), 21546069 (p=6.50e-03),
comorbidity AND asthma AND rhinitis AND (eczema OR "atopic dermatitis")	192	3146	HMGB1	-	559	5	0.008351	24152844 (p=1.90e-03), 26250770 (p=2.20e-03), 22333024 (p=4.20e-03), 21380479 (p=4.70e-03), 22127490 (p=6.00e-03),
comorbidity AND asthma AND rhinitis AND (eczema OR "atopic dermatitis")	193	3350	HTR1A	-	307	4	0.008708	18663369 (p=4.30e-03), 23308375 (p=5.10e-03), 18937842 (p=5.60e-03), 22044630 (p=9.20e-03),
comorbidity AND asthma AND rhinitis AND (eczema OR "atopic dermatitis")	194	123688	HYKK	-	21	2	0.008752	22837378 (p=6.20e-03), 19300482 (p=8.70e-03),
comorbidity AND asthma AND rhinitis AND (eczema OR "atopic dermatitis")	195	353143	LCE3B	-	22	2	0.009572	20376060 (p=1.10e-03), 21995181 (p=3.60e-03),
comorbidity AND asthma AND rhinitis AND (eczema OR "atopic dermatitis")	196	3398	ID2	-	125	3	0.009758	22075330 (p=2.20e-03), 23817569 (p=3.00e-03), 19733838 (p=4.30e-03),
comorbidity AND asthma AND rhinitis AND (eczema OR "atopic dermatitis")	197	1030	CDKN2B	-	319	4	0.009861	20462933 (p=6.02e-04), 21270820 (p=6.80e-03), 20971364 (p=8.10e-03), 18984664 (p=9.80e-03),
comorbidity AND asthma AND rhinitis AND (eczema OR "atopic dermatitis")	198	5468	PPARG	-	1639	8	0.009922	21548985 (p=3.90e-03), 17322631 (p=4.50e-03), 17329993 (p=4.70e-03), 16896567 (p=4.70e-03), 18598350 (p=6.10e-03), 21540831 (p=6.60e-03), 18984664 (p=9.80e-03), 15543217 (p=9.80e-03),
