# Supplementary material for: Computational analysis of multimorbidity between asthma, eczema and rhinitis
Source: PLoS One. 2017 Jun 9;12(6):e0179125. doi: 10.1371/journal.pone.0179125 (PMC5466323; doi:10.1371/journal.pone.0179125)
Supplement: S9 Table — Gene names are provided as common (HGNC) gene names and protein names as UniProt accessions. (XLS) [file pone.0179125.s020.xls]

## Sheet: table1_nogwas
UniProt accession	gene name	protein name	location	asthma	eczema	rhinitis
P05112	IL4	interleukin 4	5q31.1	√	√	√
P35225	IL13	interleukin 13	5q31.1	√	√	√
O95760	IL33	interleukin 33	9p24.1	√	√
P01584	IL1B	interleukin 1 beta	2q14.1	√	√
P05113	IL5	interleukin 5	5q31.1	√	√
P13501	CCL5	chemokine (C-C motif) ligand 5	17q12	√	√
P51671	CCL11	chemokine (C-C motif) ligand 11	17q12	√	√
P51677	CCR3	chemokine (C-C motif) receptor 3	3p21.31	√	√
Q8IZI9	IFNL3	interferon, lambda 3	19q13.2	√	√
Q969D9	TSLP	thymic stromal lymphopoietin	5q22.1	√	√
P01303	NPY	neuropeptide Y	7p15.3	√		√
P16109	SELP	selectin P	1q24.2	√		√
P21731	TBXA2R	thromboxane A2 receptor	19p13.3	√		√
P24394	IL4R	interleukin 4 receptor	16p12.1	√		√
P50135	HNMT	histamine N-methyltransferase	2q22.1	√		√
Q13093	PLA2G7	phospholipase A2 group VII	6p12.3	√		√
Q96D42	HAVCR1	hepatitis A virus cellular receptor 1	5q33.3	√		√
Q9HBE5	IL21R	interleukin 21 receptor	16p12.1	√		√
Q9NQ38	SPINK5	serine peptidase inhibitor, Kazal type 5	5q32	√		√
Q9UIL8	PHF11	PHD finger protein 11	13q14.2	√		√
O00167	EYA2	EYA transcriptional coactivator and phosphatase 2	20q13.12	√
O14986	PIP5K1B	phosphatidylinositol-4-phosphate 5-kinase, type I, beta	9q21.11	√
O15217	GSTA4	glutathione S-transferase alpha 4	6p12.2	√
O60242	ADGRB3	adhesion G protein-coupled receptor B3	6q12	√
O75762	TRPA1	transient receptor potential cation channel, subfamily A, member 1	8q21.11	√
O75899	GABBR2	gamma-aminobutyric acid (GABA) B receptor, 2	9q22.33	√
O76090	BEST1	bestrophin 1	11q12.3	√
O94851	MICAL2	microtubule associated monooxygenase, calponin and LIM domain containing 2	11p15.3	√
O95271	TNKS	tankyrase, TRF1-interacting ankyrin-related ADP-ribose polymerase	8p23.1	√
O95714	HERC2	HECT and RLD domain containing E3 ubiquitin protein ligase 2	15q13.1	√
O95715	CXCL14	chemokine (C-X-C motif) ligand 14	5q31.1	√
P00749	PLAU	plasminogen activator, urokinase	10q22.2	√
P01137	TGFB1	transforming growth factor beta 1	19q13.2	√
P01375	TNF	tumor necrosis factor	6p21.33	√
P01909	HLA-DQA1	major histocompatibility complex, class II, DQ alpha 1	6p21.32	√
P01911	HLA-DRB1	major histocompatibility complex, class II, DR beta 1	6p21.32	√
P01912	HLA-DRB1	major histocompatibility complex, class II, DR beta 1	6p21.32	√
P01920	HLA-DQB1	major histocompatibility complex, class II, DQ beta 1	6p21.32	√
P02794	FTH1	ferritin, heavy polypeptide 1	11q12.3	√
P02818	BGLAP	bone gamma-carboxyglutamate (gla) protein	1q22	√
P04040	CAT	catalase	11p13	√
P04440	HLA-DPB1	major histocompatibility complex, class II, DP beta 1	6p21.32	√
P05089	ARG1	arginase 1	6q23.2	√
P05091	ALDH2	aldehyde dehydrogenase 2 family (mitochondrial)	12q24.12	√
P05305	EDN1	endothelin 1	6p24.1	√
P05362	ICAM1	intercellular adhesion molecule 1	19p13.2	√
P07550	ADRB2	adrenoceptor beta 2	5q32	√
P08571	CD14	CD14 molecule	5q31.3	√
P08579	SNRPB2	small nuclear ribonucleoprotein polypeptide B	20p12.1	√
P08727	KRT19	keratin 19, type I	17q21.2	√
P09211	GSTP1	glutathione S-transferase pi 1	11q13.2	√
P09238	MMP10	matrix metallopeptidase 10	11q22.2	√
P09488	GSTM1	glutathione S-transferase mu 1	1p13.3	√
P09601	HMOX1	heme oxygenase 1	22q12.3	√
P09874	PARP1	poly(ADP-ribose) polymerase 1	1q42.12	√
P09917	ALOX5	arachidonate 5-lipoxygenase	10q11.21	√
P10242	MYB	v-myb avian myeloblastosis viral oncogene homolog	6q23.3	√
P10415	BCL2	B-cell CLL/lymphoma 2	18q21.33	√
P10827	THRA	thyroid hormone receptor, alpha	17q21.1	√
P11684	SCGB1A1	secretoglobin, family 1A, member 1 (uteroglobin)	11q12.3	√
P12724	RNASE3	ribonuclease, RNase A family, 3	14q11.2	√
P13500	CCL2	chemokine (C-C motif) ligand 2	17q12	√
P14780	MMP9	matrix metallopeptidase 9	20q13.12	√
P15291	B4GALT1	UDP-Gal:betaGlcNAc beta 1,4- galactosyltransferase, polypeptide 1	9p21.1	√
P15514	AREG	amphiregulin	4q13.3	√
P15559	NQO1	NAD(P)H dehydrogenase, quinone 1	16q22.1	√
P15692	VEGFA	vascular endothelial growth factor A	6p21.1	√
P16452	EPB42	erythrocyte membrane protein band 4.2	15q15.2	√
P17693	HLA-G	major histocompatibility complex, class I, G	6p22.1	√
P18510	IL1RN	interleukin 1 receptor antagonist	2q14.1	√
P20393	NR1D1	nuclear receptor subfamily 1 group D member 1	17q21.1	√
P23468	PTPRD	protein tyrosine phosphatase, receptor type, D	9p23	√
P23760	PAX3	paired box 3	2q36.1	√
P24821	TNC	tenascin C	9q33.1	√
P25391	LAMA1	laminin subunit alpha 1	18p11.31	√
P29460	IL12B	interleukin 12B	5q33.3	√
P30542	ADORA1	adenosine A1 receptor	1q32.1	√
P35228	NOS2	nitric oxide synthase 2	17q11.2	√
P35354	PTGS2	prostaglandin-endoperoxide synthase 2 (prostaglandin G/H synthase and cyclooxygenase)	1q31.1	√
P35443	THBS4	thrombospondin 4	5q14.1	√
P35625	TIMP3	TIMP metallopeptidase inhibitor 3	22q12.3	√
P36222	CHI3L1	chitinase 3 like 1	1q32.1	√
P36941	LTBR	lymphotoxin beta receptor	12p13.31	√
P37088	SCNN1A	sodium channel, non voltage gated 1 alpha subunit	12p13.31	√
P43119	PTGIR	prostaglandin I2 (prostacyclin) receptor (IP)	19q13.32	√
P53779	MAPK10	mitogen-activated protein kinase 10	4q21.3	√
P56539	CAV3	caveolin 3	3p25.3	√
P56975	NRG3	neuregulin 3	10q23.1	√
P67775	PPP2CA	protein phosphatase 2, catalytic subunit, alpha isozyme	5q31.1	√
P78540	ARG2	arginase 2	14q24.1	√
P80365	HSD11B2	hydroxysteroid (11-beta) dehydrogenase 2	16q22.1	√
Q01638	IL1RL1	interleukin 1 receptor-like 1	2q12.1	√
Q02930	CREB5	cAMP responsive element binding protein 5	7p15.1	√
Q07343	PDE4B	phosphodiesterase 4B	1p31.3	√
Q08462	ADCY2	adenylate cyclase 2 (brain)	5p15.31	√
Q08499	PDE4D	phosphodiesterase 4D	5q12.1	√
Q0P6H9	TMEM62	transmembrane protein 62	15q15.2	√
Q13023	AKAP6	A-kinase anchoring protein 6	14q12	√
Q13203	MYBPH	myosin binding protein H	1q32.1	√
Q13224	GRIN2B	glutamate receptor, ionotropic, N-methyl D-aspartate 2B	12p13.1	√
Q13449	LSAMP	limbic system-associated membrane protein	3q13.31	√
Q13835	PKP1	plakophilin 1	1q32.1	√
Q14964	RAB39A	RAB39A, member RAS oncogene family	11q22.3	√
Q14C87	TMEM132D	transmembrane protein 132D	12q24.33	√
Q15025	TNIP1	TNFAIP3 interacting protein 1	5q33.1	√
Q15063	POSTN	periostin, osteoblast specific factor	13q13.3	√
Q16873	LTC4S	leukotriene C4 synthase	5q35.3	√
Q29974	HLA-DRB1	major histocompatibility complex, class II, DR beta 1	6p21.32	√
Q2M1K9	ZNF423	zinc finger protein 423	16q12.1	√
Q53QV2	LBH	limb bud and heart development	2p23.1	√
Q5JR59	MTUS2	microtubule associated tumor suppressor candidate 2	13q12.3	√
Q6K0P9	PYHIN1	pyrin and HIN domain family member 1	1q23.1	√
Q6W5P4	NPSR1	neuropeptide S receptor 1	7p14.3	√
Q6ZTQ4	CDHR3	cadherin related family member 3	7q22.3	√
Q7L622	G2E3	G2/M-phase specific E3 ubiquitin protein ligase	14q12	√
Q86Y37	CACUL1	CDK2-associated, cullin domain 1	10q26.11	√
Q8IVL1	NAV2	neuron navigator 2	11p15.1	√
Q8N138	ORMDL3	ORMDL sphingolipid biosynthesis regulator 3	17q21.1	√
Q8NEY1	NAV1	neuron navigator 1	1q32.1	√
Q8NI36	WDR36	WD repeat domain 36	5q22.1	√
Q8TAX7	MUC7	mucin 7, secreted	4q13.3	√
Q8TBG9	SYNPR	synaptoporin	3p14.2	√
Q8TE73	DNAH5	dynein, axonemal, heavy chain 5	5p15.2	√
Q92608	DOCK2	dedicator of cytokinesis 2	5q35.1	√
Q92878	RAD50	RAD50 homolog, double strand break repair protein	5q31.1	√
Q96A23	CPNE4	copine IV	3q22.1	√
Q96BK5	PINX1	PIN2/TERF1 interacting, telomerase inhibitor 1	8p23.1	√
Q96IP4	FAM46A	family with sequence similarity 46 member A	6q14.1	√
Q96PU5	NEDD4L	neural precursor cell expressed, developmentally down-regulated 4-like, E3 ubiquitin protein ligase	18q21.31	√
Q9BQT8	SLC25A21	solute carrier family 25 (mitochondrial oxoadipate carrier), member 21	14q13.3	√
Q9H7Z3	NRDE2	NRDE-2, necessary for RNA interference, domain containing	14q32.11	√
Q9HB29	IL1RL2	interleukin 1 receptor-like 2	2q12.1	√
Q9HBI1	PARVB	parvin beta	22q13.31	√
Q9HCJ2	LRRC4C	leucine rich repeat containing 4C	11p12	√
Q9NS75	CYSLTR2	cysteinyl leukotriene receptor 2	13q14.2	√
Q9NS91	RAD18	RAD18, E3 ubiquitin protein ligase	3p25.3	√
Q9P2M7	CGN	cingulin	1q21.3	√
Q9UHI8	ADAMTS1	ADAM metallopeptidase with thrombospondin type 1 motif 1	21q21.3	√
Q9UI47	CTNNA3	catenin alpha 3	10q21.3	√
Q9ULU4	ZMYND8	zinc finger, MYND-type containing 8	20q13.12	√
Q9UNA4	POLI	polymerase (DNA directed) iota	18q21.2	√
Q9Y271	CYSLTR1	cysteinyl leukotriene receptor 1	Xq21.1	√
Q9Y496	KIF3A	kinesin family member 3A	5q31.1	√
Q9Y5Y4	PTGDR2	prostaglandin D2 receptor 2	11q12.2	√
Q9Y616	IRAK3	interleukin 1 receptor associated kinase 3	12q14.3	√
O00175	CCL24	chemokine (C-C motif) ligand 24	7q11.23		√
O00626	CCL22	chemokine (C-C motif) ligand 22	16q21		√
O14543	SOCS3	suppressor of cytokine signaling 3	17q25.3		√
O95497	VNN1	vanin 1	6q23.2		√
O95498	VNN2	vanin 2	6q23.2		√
P01579	IFNG	interferon, gamma	12q15		√
P02778	CXCL10	chemokine (C-X-C motif) ligand 10	4q21.1		√
P05109	S100A8	S100 calcium binding protein A8	1q21.3		√
P05231	IL6	interleukin 6	7p15.3		√
P16278	GLB1	galactosidase beta 1	3p22.3		√
P16581	SELE	selectin E	1q24.2		√
P20930	FLG	filaggrin	1q21.3		√
P22301	IL10	interleukin 10	1q32.1		√
P42768	WAS	Wiskott-Aldrich syndrome	Xp11.23		√
P45983	MAPK8	mitogen-activated protein kinase 8	10q11.22		√
P49682	CXCR3	chemokine (C-X-C motif) receptor 3	Xq13.1		√
P51681	CCR5	chemokine (C-C motif) receptor 5 (gene/pseudogene)	3p21.31		√
Q07869	PPARA	peroxisome proliferator-activated receptor alpha	22q13.31		√
Q70YC5	ZNF365	zinc finger protein 365	10q21.2		√
Q76M96	CCDC80	coiled-coil domain containing 80	3q13.2		√
Q7Z589	EMSY	EMSY, BRCA2-interacting transcriptional repressor	11q13.5		√
Q8TC94	ACTL9	actin like 9	19p13.2		√
Q92583	CCL17	chemokine (C-C motif) ligand 17	16q21		√
Q9BXL7	CARD11	caspase recruitment domain family member 11	7p22.2		√
P01037	CST1	cystatin SN	20p11.21			√
P01282	VIP	vasoactive intestinal peptide	6q25.2			√
P02768	ALB	albumin	4q13.3			√
P13569	CFTR	cystic fibrosis transmembrane conductance regulator	7q31.2			√
P35367	HRH1	histamine receptor H1	3p25.3			√
