# Supplementary material for: Computational analysis of multimorbidity between asthma, eczema and rhinitis
Source: PLoS One. 2017 Jun 9;12(6):e0179125. doi: 10.1371/journal.pone.0179125 (PMC5466323; doi:10.1371/journal.pone.0179125)
Supplement: S11 Table — Numerical values show how similar is the use of a cellular pathway by pairs of trios of diseases. Similarity = 1 means that the diseases affect the pathway in exactly the same way. Similarity = 0 is represented by blank cells. Dark blue cells: similarity is significantly larger than random expectation (z-test; P < 0.01). Light blue cells: similarity is significantly larger than random expectation (z-test; P < 0.05). All significant similarities were also significantly larger than observed for pairs and trios of immune system diseases (empirical distribution test; P < 0.01). (XLS) [file pone.0179125.s022.xls]

## Sheet: Sheet1
pathway	asthma - dermatitis, atopic	asthma - rhinitis	dermatitis, atopic - rhinitis	asthma - dermatitis, atopic - rhinitis
Regulation of hematopoiesis by cytokines	1
CCR3 signaling in Eosinophils	1
The Role of Eosinophils in the Chemokine Network of Allergy	0.571
IL 4 signaling pathway	0.533	1	0.533	0.533
GATA3 participate in activating the Th2 cytokine genes expression	1	0.667	0.667	0.667
Cytokine Network	0.5	0.333	0.5	0.3
IL12 and Stat4 Dependent Signaling Pathway in Th1 Development	0.057
Th1/Th2 Differentiation	0.17	0.286	0.389	0.149
Erythrocyte Differentiation Pathway	0.5
The 4-1BB-dependent immune response	0.222	1	0.222	0.222
Dendritic cells in regulating TH1 and TH2 Development	0.556	0.25	0.333	0.222
Role of Tob in T-cell activation	0.125	0.125	1	0.125
Antigen Dependent B Cell Activation	0.077	0.077	1	0.077
Cytokines and Inflammatory Response	0.25	0.111	0.375	0.107
IL-2 Receptor Beta Chain in T cell Activation
Selective expression of chemokine receptors during T-cell polarization	0.303	0.455	0.24	0.182
IL 5 Signaling Pathway	0.333	0.111	0.333	0.111
NFkB activation by Nontypeable Hemophilus influenzae	0.333
Adhesion and Diapedesis of Granulocytes	0.111	0.333
Monocyte and its Surface Molecules		0.4
Cells and Molecules involved in local acute inflammatory response		0.286
Signal transduction through IL1R	0.246
Cystic Fibrosis Transmembrane Conductance Regulator And Beta 2 Adrenergic Receptor Pathway		0.077
Pertussis toxin-insensitive CCR5 Signaling in Macrophage	0.071
Ceramide Signaling Pathway	0.038
NO2-dependent IL 12 Pathway in NK cells	0.037
NFAT and Hypertrophy of the heart (Transcription in the broken heart)	0.036
TNFR1 Signaling Pathway	0.031
HIV-I Nef: negative effector of Fas and TNF	0.029
TNF/Stress Related Signaling	0.028
Keratinocyte Differentiation	0.027
MAPKinase Signaling Pathway	0.024
ATM Signaling Pathway
Adhesion Molecules on Lymphocyte
Agrin in Postsynaptic Differentiation
Chaperones modulate interferon Signaling Pathway
FAS signaling pathway ( CD95 )
Hypoxia and p53 in the Cardiovascular system
IL-10 Anti-inflammatory Signaling Pathway
Mechanism of Gene Regulation by Peroxisome Proliferators via PPARa(alpha)
Neutrophil and Its Surface Molecules
Toll-Like Receptor Pathway
