# Supplementary material for: Computational analysis of multimorbidity between asthma, eczema and rhinitis
Source: PLoS One. 2017 Jun 9;12(6):e0179125. doi: 10.1371/journal.pone.0179125 (PMC5466323; doi:10.1371/journal.pone.0179125)
Supplement: S12 Table — Gene names are provided as common gene names and protein names as UniProt accessions. NetZcore prediction scores are shown as z-scores. Proteins are ranked according to their average z-score for all diseases. Empty cell: the protein was not predicted to be associated with the disease with z-score > 2.31 (corresponding to P < 0.01). Exp: the protein is experimentally known to be associated to the disease. Proteins predicted (or experimentally known) to be associated to more than one disease are candidates to multimorbidity. (XLS) [file pone.0179125.s023.xls]

## Sheet: Sheet1
UniProt accession	Gene name	Protein name	z-score asthma	z-score dermatitis, atopic	z-score rhinitis
Q9Y496	KIF3A	kinesin family member 3A	exp	exp	10.26
P24394	IL4R	interleukin 4 receptor	exp	4.21	exp
Q9HBE5	IL21R	interleukin 21 receptor	exp	3.95	exp
Q9UIL8	PHF11	PHD finger protein 11	exp	2.85	exp
P16278	GLB1	galactosidase beta 1	5.56	exp	6.03
O95715	CXCL14	chemokine (C-X-C motif) ligand 14	exp	10.85
P20036	HLA-DPA1	major histocompatibility complex, class II, DP alpha 1	exp		7.93
P04440	HLA-DPB1	major histocompatibility complex, class II, DP beta 1	exp		7.81
P13500	CCL2	chemokine (C-C motif) ligand 2	exp	7
P01903	HLA-DRA	major histocompatibility complex, class II, DR alpha	exp		6.96
Q29974	HLA-DRB1	major histocompatibility complex, class II, DR beta 1	exp		6.68
P01911	HLA-DRB1	major histocompatibility complex, class II, DR beta 1	exp		6.68
P14784	IL2RB	interleukin 2 receptor subunit beta	exp	2.79	2.35
P29460	IL12B	interleukin 12B	exp		4.3
P08887	IL6R	interleukin 6 receptor	exp	4.29
Q8TE73	DNAH5	dynein, axonemal, heavy chain 5	exp		3.57
P35625	TIMP3	TIMP metallopeptidase inhibitor 3	exp	2.46
P17693	HLA-G	major histocompatibility complex, class I, G	exp		2.37
Q9P0G3	KLK14	kallikrein related peptidase 14	12.9	3.78	18.27
Q9Y337	KLK5	kallikrein related peptidase 5	9.01	3.64	12.1
P14091	CTSE	cathepsin E	11.16		13.22
P53634	CTSC	cathepsin C	11.16		13.22
Q9UBX1	CTSF	cathepsin F	11.16		13.22
Q99538	LGMN	legumain	10.55		12.39
O00287	RFXAP	regulatory factor X associated protein	10.46		12.36
P10619	CTSA	cathepsin A	10.24		12.06
P43235	CTSK	cathepsin K	9.86		11.47
P52732	KIF11	kinesin family member 11	9.64		11.55
O15066	KIF3B	kinesin family member 3B	9.61		11.51
O14782	KIF3C	kinesin family member 3C	9.4		11.28
Q14807	KIF22	kinesin family member 22	9.4		11.28
Q9NS87	KIF15	kinesin family member 15	9.36		11.21
O60911	CTSV	cathepsin V	9.37		10.92
Q6P597	KLC3	kinesin light chain 3	9.26		11.03
P13765	HLA-DOB	major histocompatibility complex, class II, DO beta	9.2		10.86
Q9BTE1	DCTN5	dynactin subunit 5	8.95		10.76
Q9BXW6	OSBPL1A	oxysterol binding protein like 1A	8.95		10.76
Q8TCX1	DYNC2LI1	dynein, cytoplasmic 2, light intermediate chain 1	8.95		10.76
Q8IWE5	PLEKHM2	pleckstrin homology and RUN domain containing M2	8.98		10.68
Q9UJW0	DCTN4	dynactin subunit 4	8.9		10.7
Q96NA2	RILP	Rab interacting lysosomal protein	8.88		10.67
Q9NSK0	KLC4	kinesin light chain 4	8.9		10.6
P07711	CTSL	cathepsin L	8.88		10.37
P09668	CTSH	cathepsin H	8.8		10.38
Q92845	KIFAP3	kinesin-associated protein 3	8.65		10.34
O00399	DCTN6	dynactin subunit 6	8.52		10.27
P25774	CTSS	cathepsin S	8.66		10.06
Q12840	KIF5A	kinesin family member 5A	8.43		10.07
Q9H0B6	KLC2	kinesin light chain 2	8.45		10.05
Q9NZ32	ACTR10	actin-related protein 10 homolog (S. cerevisiae)	8.27		10.13
P28068	HLA-DMB	major histocompatibility complex, class II, DM beta	8.41		9.93
Q9BQ51	PDCD1LG2	programmed cell death 1 ligand 2	8.4		9.91
Q15116	PDCD1	programmed cell death 1	8.39		9.9
O95239	KIF4A	kinesin family member 4A	8.3		9.95
P28067	HLA-DMA	major histocompatibility complex, class II, DM alpha	8.36		9.87
Q07866	KLC1	kinesin light chain 1	8.31		9.88
Q9NZQ7	CD274	CD274 molecule	8.28		9.77
O95235	KIF20A	kinesin family member 20A	8.16		9.85
O60282	KIF5C	kinesin family member 5C	8.13		9.72
P06340	HLA-DOA	major histocompatibility complex, class II, DO alpha	8.12		9.57
O95486	SEC24A	SEC24 homolog A, COPII coat complex component	7.74		9.22
P42025	ACTR1B	ARP1 actin-related protein 1 homolog B, centractin beta (yeast)	7.64		9.24
O95487	SEC24B	SEC24 homolog B, COPII coat complex component	7.69		9.16
O94855	SEC24D	SEC24 homolog D, COPII coat complex component	7.67		9.14
Q8NCM8	DYNC2H1	dynein, cytoplasmic 2, heavy chain 1	7.57		9.16
P53992	SEC24C	SEC24 homolog C, COPII coat complex component	7.55		9.01
O94979	SEC31A	SEC31 homolog A, COPII coat complex component	7.55		9.01
Q15436	SEC23A	Sec23 homolog A, COPII coat complex component	7.54		8.99
O14593	RFXANK	regulatory factor X associated ankyrin containing protein	7.54		8.97
P49862	KLK7	kallikrein related peptidase 7	6.12	2.34	8.03
O43237	DYNC1LI2	dynein, cytoplasmic 1, light intermediate chain 2	7.43		8.99
Q9Y6B6	SAR1B	secretion associated, Ras related GTPase 1B	7.36		8.76
Q02241	KIF23	kinesin family member 23	7.29		8.79
O14576	DYNC1I1	dynein, cytoplasmic 1, intermediate chain 1	7.27		8.8
P01733			7.33		8.69
Q96FJ2	DYNLL2	dynein, light chain, LC8-type 2	7.25		8.76
P01850			7.25		8.6
P01848			7.18		8.52
P07858	CTSB	cathepsin B	7.1		8.28
P51149	RAB7A	RAB7A, member RAS oncogene family	6.86		8.33
P07339	CTSD	cathepsin D	7.13		8.03
P43632	KIR2DS4	killer cell immunoglobulin-like receptor, two domains, short cytoplasmic tail, 4	6.84		8.17
P43627	KIR2DL2	killer cell immunoglobulin-like receptor, two domains, long cytoplasmic tail, 2	6.8		8.1
P05538	HLA-DQB2	major histocompatibility complex, class II, DQ beta 2	6.77		8.1
P79483	HLA-DRB3	major histocompatibility complex, class II, DR beta 3	6.75		8.07
Q30154	HLA-DRB5	major histocompatibility complex, class II, DR beta 5	6.75		8.07
P13762	HLA-DRB4	major histocompatibility complex, class II, DR beta 4	6.75		8.07
P43631	KIR2DS2	killer cell immunoglobulin-like receptor, two domains, short cytoplasmic tail, 2	6.72		8.01
P26715	KLRC1	killer cell lectin-like receptor subfamily C, member 1	6.72		8.01
P48382	RFX5	regulatory factor X5	6.76		7.9
Q9NWQ8	PAG1	phosphoprotein membrane anchor with glycosphingolipid microdomains 1	6.71		7.89
Q9UQ16	DNM3	dynamin 3	6.7		7.85
P43628	KIR2DL3	killer cell immunoglobulin-like receptor, two domains, long cytoplasmic tail, 3	6.64		7.91
P43629	KIR3DL1	killer cell immunoglobulin-like receptor, three domains, long cytoplasmic tail, 1	6.63		7.89
P43626	KIR2DL1	killer cell immunoglobulin-like receptor, two domains, long cytoplasmic tail, 1	6.62		7.87
Q96PC3	AP1S3	adaptor related protein complex 1 sigma 3 subunit	6.56		7.93
P56377	AP1S2	adaptor related protein complex 1 sigma 2 subunit	6.53		7.89
O75023	LILRB5	leukocyte immunoglobulin-like receptor, subfamily B (with TM and ITIM domains), member 5	6.44		7.68
Q03519	TAP2	transporter 2, ATP-binding cassette, sub-family B (MDR/TAP)	6.44		7.68
Q99969	RARRES2	retinoic acid receptor responder (tazarotene induced) 2	6.58		7.52
P27824	CANX	calnexin	6.39		7.6
Q8N423	LILRB2	leukocyte immunoglobulin-like receptor, subfamily B (with TM and ITIM domains), member 2	6.37		7.59
Q9Y6Q5	AP1M2	adaptor related protein complex 1 mu 2 subunit	6.29		7.61
P33176	KIF5B	kinesin family member 5B	6.31		7.58
Q8NHJ6	LILRB4	leukocyte immunoglobulin-like receptor, subfamily B (with TM and ITIM domains), member 4	6.34		7.55
P61966	AP1S1	adaptor related protein complex 1 sigma 1 subunit	6.27		7.59
Q9H6Q3	SLA2	Src-like-adaptor 2	5.35	2.59	5.83
O15020	SPTBN2	spectrin, beta, non-erythrocytic 2	6.18		7.43
Q10567	AP1B1	adaptor related protein complex 1 beta 1 subunit	6.16		7.43
P04233	CD74	CD74 molecule, major histocompatibility complex, class II invariant chain	6.21		7.33
O43747	AP1G1	adaptor related protein complex 1 gamma 1 subunit	6.09		7.36
Q96RN1	SLC26A8	solute carrier family 26 (anion exchanger), member 8	6.01		7.41
Q99706	KIR2DL4	killer cell immunoglobulin-like receptor, two domains, long cytoplasmic tail, 4	6.09		7.2
Q13445	TMED1	transmembrane p24 trafficking protein 1	3.45	6.03	3.73
P30101	PDIA3	protein disulfide isomerase family A member 3	5.99		7.16
Q9BXS5	AP1M1	adaptor related protein complex 1 mu 1 subunit	5.94		7.2
Q96NW4	ANKRD27	ankyrin repeat domain 27	5.86		7.24
Q03518	TAP1	transporter 1, ATP-binding cassette, sub-family B (MDR/TAP)	5.95		7.07
Q9NQV6	PRDM10	PR domain containing 10	5.97		7.01
Q9H0H5	RACGAP1	Rac GTPase activating protein 1	5.77		7.08
Q9UJU6	DBNL	drebrin-like	5.92		6.87
Q8NHL6	LILRB1	leukocyte immunoglobulin-like receptor, subfamily B (with TM and ITIM domains), member 1	5.83		6.92
P04234	CD3D	CD3d molecule, delta (CD3-TCR complex)	5.83		6.79
P08575	PTPRC	protein tyrosine phosphatase, receptor type, C	5.82		6.78
P78314	SH3BP2	SH3-domain binding protein 2	5.76		6.72
O15117	FYB	FYN binding protein	5.74		6.69
P26717	KLRC2	killer cell lectin-like receptor subfamily C, member 2	5.67		6.72
Q8NDI1	EHBP1	EH domain binding protein 1	5.85		6.53
P04229	HLA-DRB1	major histocompatibility complex, class II, DR beta 1	5.64		6.68
O15533	TAPBP	TAP binding protein (tapasin)	5.62		6.66
P07766	CD3E	CD3e molecule, epsilon (CD3-TCR complex)	5.67		6.61
Q13241	KLRD1	killer cell lectin-like receptor subfamily D, member 1	5.55		6.57
O00189	AP4M1	adaptor related protein complex 4, mu 1 subunit	5.29		6.81
P11279	LAMP1	lysosomal-associated membrane protein 1	5.42		6.56
P98187	CYP4F8	cytochrome P450 family 4 subfamily F member 8	5.38		6.22
P01732	CD8A	CD8a molecule	5.32		6.22
Q9UIQ6	LNPEP	leucyl/cystinyl aminopeptidase	5.24		6.27
Q6VY07	PACS1	phosphofurin acidic cluster sorting protein 1	5.2		6.27
Q99665	IL12RB2	interleukin 12 receptor subunit beta 2	4.29	2.52	4.57
Q86SG6	NEK8	NIMA-related kinase 8	5.3		6.06
Q9NPH9	IL26	interleukin 26	3.2	4.99	2.9
Q9NYY1	IL20	interleukin 20	2.99	5.31	2.64
Q13952	NFYC	nuclear transcription factor Y subunit gamma	5.06		5.81
Q92918	MAP4K1	mitogen-activated protein kinase kinase kinase kinase 1	5.05		5.78
P10747	CD28	CD28 molecule	5.02		5.77
P53680	AP2S1	adaptor related protein complex 2 sigma 1 subunit	4.95		5.75
P42701	IL12RB1	interleukin 12 receptor subunit beta 1	4.01	2.43	4.25
P43403	ZAP70	zeta chain of T cell receptor associated protein kinase 70kDa	4.9		5.6
O14617	AP3D1	adaptor related protein complex 3, delta 1 subunit	4.49		5.85
P0CAP1	MYZAP	myocardial zonula adherens protein	4.51		5.76
P41240	CSK	c-src tyrosine kinase	4.76		5.48
P84077	ARF1	ADP ribosylation factor 1	4.58		5.63
Q8TDQ1	CD300LF	CD300 molecule like family member f	3.45	3.24	3.51
Q9Y336	SIGLEC9	sialic acid binding Ig-like lectin 9	3.45	3.24	3.51
P08922	ROS1	ROS proto-oncogene 1 , receptor tyrosine kinase	3.45	3.24	3.51
Q13409	DYNC1I2	dynein, cytoplasmic 1, intermediate chain 2	4.42		5.67
Q13561	DCTN2	dynactin subunit 2	4.41		5.65
Q9ULA0	DNPEP	aspartyl aminopeptidase	4.56		5.45
Q08116	RGS1	regulator of G-protein signaling 1	4.67		5.34
Q9BYG3	NIFK	nucleolar protein interacting with the FHA domain of MKI67	4.27		5.72
P51808	DYNLT3	dynein, light chain, Tctex-type 3	4.54		5.44
O75935	DCTN3	dynactin subunit 3	4.37		5.6
P33681	CD80	CD80 molecule	4.59		5.33
Q9NR31	SAR1A	secretion associated, Ras related GTPase 1A	4.4		5.5
P29597	TYK2	tyrosine kinase 2	3.5	2.82	3.55
O43914	TYROBP	TYRO protein tyrosine kinase binding protein	4.5		5.37
P27797	CALR	calreticulin	4.45		5.28
P61163	ACTR1A	ARP1 actin-related protein 1 homolog A, centractin alpha (yeast)	4.25		5.47
P09693	CD3G	CD3g molecule, gamma (CD3-TCR complex)	4.46		5.24
P42081	CD86	CD86 molecule	4.49		5.2
A6NHL2	TUBAL3	tubulin alpha like 3	4.3		5.38
Q6PEY2	TUBA3E	tubulin alpha 3e	4.3		5.38
P63010	AP2B1	adaptor related protein complex 2, beta 1 subunit	4.36		5.11
Q3ZCM7	TUBB8	tubulin beta 8 class VIII	4.19		5.27
Q13094	LCP2	lymphocyte cytosolic protein 2	4.37		5.07
P20963	CD247	CD247 molecule	4.33		5.08
Q96CW1	AP2M1	adaptor related protein complex 2, mu 1 subunit	4.32		5.03
O75061	DNAJC6	DnaJ heat shock protein family (Hsp40) member C6	4.04		5.13
O75791	GRAP2	GRB2-related adaptor protein 2	4.21		4.89
Q14204	DYNC1H1	dynein, cytoplasmic 1, heavy chain 1	3.95		5.11
O95782	AP2A1	adaptor related protein complex 2, alpha 1 subunit	4.19		4.86
P29459	IL12A	interleukin 12A	4.34		4.68
Q14203	DCTN1	dynactin subunit 1	3.97		5.04
O94973	AP2A2	adaptor related protein complex 2, alpha 2 subunit	4.17		4.81
Q0IIM8	TBC1D8B	TBC1 domain family member 8B	3.94		4.98
P61769	B2M	beta-2-microglobulin	3.95		4.71
Q99962	SH3GL2	SH3-domain GRB2-like 2	3.97		4.68
P50570	DNM2	dynamin 2	3.94		4.66
P63167	DYNLL1	dynein, light chain, LC8-type 1	3.75		4.82
Q15849	SLC14A2	solute carrier family 14 (urea transporter), member 2	3.64		4.86
Q96R06	SPAG5	sperm associated antigen 5	3.64		4.86
P55327	TPD52	tumor protein D52	3.73		4.75
O43561	LAT	linker for activation of T-cells	3.91		4.49
O43399	TPD52L2	tumor protein D52-like 2	3.56		4.78
Q16890	TPD52L1	tumor protein D52-like 1	3.66		4.64
Q86YW5	TREML1	triggering receptor expressed on myeloid cells like 1	2.87	2.55	2.84
Q96RL6	SIGLEC11	sialic acid binding Ig-like lectin 11	2.87	2.55	2.84
Q9UKJ1	PILRA	paired immunoglobin-like type 2 receptor alpha	2.87	2.55	2.84
Q96LC7	SIGLEC10	sialic acid binding Ig-like lectin 10	2.87	2.55	2.84
O95866	C6orf25	chromosome 6 open reading frame 25	2.87	2.55	2.84
Q16626	MEA1	male-enhanced antigen 1	3.8		4.45
Q969L2	MAL2	mal, T-cell differentiation protein 2 (gene/pseudogene)	3.52		4.7
P51809	VAMP7	vesicle associated membrane protein 7	3.56		4.6
P55087	AQP4	aquaporin 4	3.76		4.4
Q9NQW1	SEC31B	SEC31 homolog B, COPII coat complex component	3.56		4.58
Q05193	DNM1	dynamin 1	3.79		4.32
Q8TD16	BICD2	bicaudal D homolog 2 (Drosophila)	3.62		4.44
P55735	SEC13	SEC13 homolog, nuclear pore and COPII coat complex component	3.46		4.5
P29016	CD1B	CD1b molecule	3.51		4.41
P06126	CD1A	CD1a molecule	3.51		4.41
P24158	PRTN3	proteinase 3	3.11	4.72
P11021	HSPA5	heat shock protein family A (Hsp70) member 5	3.54		4.24
Q9Y6G9	DYNC1LI1	dynein, cytoplasmic 1, light intermediate chain 1	3.38		4.29
P27352	GIF	gastric intrinsic factor	4		3.64
P28325	CST5	cystatin D	3.77		3.84
Q08881	ITK	IL2-inducible T-cell kinase	3.54		4.04
P37275	ZEB1	zinc finger E-box binding homeobox 1	3.56		3.99
Q14165	MLEC	malectin	3.36		4.11
P01589	IL2RA	interleukin 2 receptor subunit alpha	2.43	2.66	2.37
Q00610	CLTC	clathrin, heavy chain (Hc)	3.45		3.99
Q9UPM8	AP4E1	adaptor related protein complex 4, epsilon 1 subunit	3.21		4.16
P09496	CLTA	clathrin, light chain A	3.37		3.92
Q9NY65	TUBA8	tubulin alpha 8	3.31		3.98
P20645	M6PR	mannose-6-phosphate receptor (cation dependent)	3.17		4.11
Q15437	SEC23B	Sec23 homolog B, COPII coat complex component	3.18		4.1
Q96JP5	ZFP91	ZFP91 zinc finger protein	2.58	4.65
Q9H3G5	CPVL	carboxypeptidase, vitellogenic-like	3.61		3.62
Q9BV40	VAMP8	vesicle associated membrane protein 8	3.06		4.17
Q6ULP2	AFTPH	aftiphilin	3.26		3.95
P29508	SERPINB3	serpin peptidase inhibitor, clade B (ovalbumin), member 3	3.48		3.68
O75976	CPD	carboxypeptidase D	3.12		4.03
Q96EC8	YIPF6	Yip1 domain family member 6	3.12		4.03
Q8NC96	NECAP1	NECAP endocytosis associated 1	3.12		4.03
Q9UBR2	CTSZ	cathepsin Z	3.11		3.97
Q9UHW9	SLC12A6	solute carrier family 12 (potassium/chloride transporter), member 6	3.41		3.65
Q9P0W0	IFNK	interferon, kappa	2.4	4.64
P05000	IFNW1	interferon, omega 1	2.4	4.64
Q92572	AP3S1	adaptor related protein complex 3, sigma 1 subunit	3.07		3.96
P61018	RAB4B	RAB4B, member RAS oncogene family	3.32		3.64
Q04759	PRKCQ	protein kinase C, theta	3.19		3.45
Q6GTX8	LAIR1	leukocyte-associated immunoglobulin-like receptor 1	3.24		3.4
O15013	ARHGEF10	Rho guanine nucleotide exchange factor 10	2.9		3.68
O43493	TGOLN2	trans-golgi network protein 2	2.88		3.67
Q96JB1	DNAH8	dynein, axonemal, heavy chain 8	2.79		3.74
P43355	MAGEA1	MAGE family member A1	2.97		3.56
P01730	CD4	CD4 molecule	3		3.5
Q9Y5X3	SNX5	sorting nexin 5	2.82		3.67
P15586	GNS	glucosamine (N-acetyl)-6-sulfatase	2.79		3.69
Q9Y6B7	AP4B1	adaptor related protein complex 4, beta 1 subunit	2.73		3.63
Q99519	NEU1	neuraminidase 1 (lysosomal sialidase)	3.15		3.2
P40933	IL15	interleukin 15	2.44	3.81
O75146	HIP1R	huntingtin interacting protein 1 related	2.72		3.52
P29350	PTPN6	protein tyrosine phosphatase, non-receptor type 6	3.02		3.13
P23511	NFYA	nuclear transcription factor Y subunit alpha	2.84		3.3
P06239	LCK	LCK proto-oncogene, Src family tyrosine kinase	2.93		3.19
Q9H2G4	TSPYL2	TSPY-like 2	2.87		3.2
Q16549	PCSK7	proprotein convertase subtilisin/kexin type 7	2.56	3.5
Q8NI77	KIF18A	kinesin family member 18A	2.52		3.53
Q8N4N8	KIF2B	kinesin family member 2B	2.52		3.53
O60494	CUBN	cubilin	3.3		2.71
Q96P31	FCRL3	Fc receptor-like 3	2.92		3.08
P01034	CST3	cystatin C	2.66		3.32
P78537	BLOC1S1	biogenesis of lysosomal organelles complex-1, subunit 1	2.53		3.45
O00139	KIF2A	kinesin heavy chain member 2A	2.48		3.48
Q99661	KIF2C	kinesin family member 2C	2.47		3.47
Q9BRA2	TXNDC17	thioredoxin domain containing 17	2.68		3.22
Q02224	CENPE	centromere protein E	2.45		3.44
Q9UJY4	GGA2	golgi-associated, gamma adaptin ear containing, ARF binding protein 2	2.72		3.17
O00203	AP3B1	adaptor related protein complex 3, beta 1 subunit	2.51		3.36
O60664	PLIN3	perilipin 3	2.38		3.37
P19957	PI3	peptidase inhibitor 3	2.67		3.07
Q8WXX0	DNAH7	dynein, axonemal, heavy chain 7	2.44		3.29
Q9GZS0	DNAI2	dynein, axonemal, intermediate chain 2	2.44		3.29
O00115	DNASE2	deoxyribonuclease II, lysosomal	2.49		3.23
Q9Y2R2	PTPN22	protein tyrosine phosphatase, non-receptor type 22 (lymphoid)	2.72		3
Q9UK23	NAGPA	N-acetylglucosamine-1-phosphodiester alpha-N-acetylglucosaminidase	2.69		3.02
P11717	IGF2R	insulin like growth factor 2 receptor	2.5		3.19
O14976	GAK	cyclin G associated kinase	2.48		3.21
Q5U5Q3	MEX3C	mex-3 RNA binding family member C	2.47		3.14
Q8NBS9	TXNDC5	thioredoxin domain containing 5 (endoplasmic reticulum)	2.36		3.24
P15498	VAV1	vav guanine nucleotide exchange factor 1	2.62		2.98
Q8TB24	RIN3	Ras and Rab interactor 3	3.05		2.54
Q15904	ATP6AP1	ATPase, H+ transporting, lysosomal accessory protein 1	2.7		2.87
Q15075	EEA1	early endosome antigen 1	2.84		2.73
Q9Y5Z0	BACE2	beta-site APP-cleaving enzyme 2	2.63		2.93
Q96DU3	SLAMF6	SLAM family member 6	2.66		2.9
P25208	NFYB	nuclear transcription factor Y subunit beta	2.53		2.96
Q14774	HLX	H2.0-like homeobox	2.37	3.1
Q2QGD7	ZXDC	ZXD family zinc finger C	2.69		2.78
P98168	ZXDA	zinc finger, X-linked, duplicated A	2.69		2.78
P30455	HLA-A	major histocompatibility complex, class I, A	2.47		2.96
P30450	HLA-A	major histocompatibility complex, class I, A	2.47		2.96
P30512	HLA-A	major histocompatibility complex, class I, A	2.47		2.96
P01891	HLA-A	major histocompatibility complex, class I, A	2.47		2.96
P30447	HLA-A	major histocompatibility complex, class I, A	2.47		2.96
P30456	HLA-A	major histocompatibility complex, class I, A	2.47		2.96
P10314	HLA-A	major histocompatibility complex, class I, A	2.47		2.96
P02774	GC	group-specific component (vitamin D binding protein)	2.6		2.83
P16189	HLA-A	major histocompatibility complex, class I, A	2.47		2.96
P16190	HLA-A	major histocompatibility complex, class I, A	2.47		2.96
P30453	HLA-A	major histocompatibility complex, class I, A	2.47		2.96
Q09160	HLA-A	major histocompatibility complex, class I, A	2.47		2.96
P30457	HLA-A	major histocompatibility complex, class I, A	2.47		2.96
P10316	HLA-A	major histocompatibility complex, class I, A	2.47		2.96
P01892	HLA-A	major histocompatibility complex, class I, A	2.47		2.96
P30459	HLA-A	major histocompatibility complex, class I, A	2.47		2.96
P18462	HLA-A	major histocompatibility complex, class I, A	2.47		2.96
P05534	HLA-A	major histocompatibility complex, class I, A	2.47		2.96
Q9Y5X1	SNX9	sorting nexin 9	2.4		3.02
P16188	HLA-A	major histocompatibility complex, class I, A	2.45		2.93
P04439	HLA-A	major histocompatibility complex, class I, A	2.45		2.93
P13746	HLA-A	major histocompatibility complex, class I, A	2.45		2.93
Q14765	STAT4	signal transducer and activator of transcription 4	2.7		2.66
P20142	PGC	progastricsin (pepsinogen C)	2.52		2.81
Q14703	MBTPS1	membrane bound transcription factor peptidase, site 1	2.5		2.82
Q9BV47	DUSP26	dual specificity phosphatase 26 (putative)	2.58		2.72
O60674	JAK2	Janus kinase 2	2.39	2.88
P41217	CD200	CD200 molecule	2.89	2.37
Q01973	ROR1	receptor tyrosine kinase-like orphan receptor 1	2.41		2.8
P30443	HLA-A	major histocompatibility complex, class I, A	2.34		2.82
Q9Y3P8	SIT1	signaling threshold regulating transmembrane adaptor 1	2.49		2.64
P56817	BACE1	beta-site APP-cleaving enzyme 1	2.46		2.64
Q99788	CMKLR1	chemerin chemokine-like receptor 1	2.46		2.6
P31785	IL2RG	interleukin 2 receptor subunit gamma	2.39	2.61
Q9H1K0	RBSN	rabenosyn, RAB effector	2.56		2.35
Q8WV41	SNX33	sorting nexin 33	2.33		2.52
Q7L4P6	BEND5	BEN domain containing 5	2.41		2.4
Q06124	PTPN11	protein tyrosine phosphatase, non-receptor type 11	2.38		2.4
Q9NZD8	SPG21	spastic paraplegia 21 (autosomal recessive, Mast syndrome)	2.36		2.32
Q9Y2I2	NTNG1	netrin G1	117.12
O76041	NEBL	nebulette		25.18
Q9ULW8	PADI3	peptidyl arginine deiminase, type III		24.6
Q9Y2J8	PADI2	peptidyl arginine deiminase, type II		21.55
P51161	FABP6	fatty acid binding protein 6, ileal			18.45
Q3KNW5	SLC10A6	solute carrier family 10 (sodium/bile acid cotransporter), member 6			15.99
O15438	ABCC3	ATP binding cassette subfamily C member 3			12.69
Q04941	PLP2	proteolipid protein 2 (colonic epithelium-enriched)		12.23
P80294	MT1H	metallothionein 1H		12.13
O15235	MRPS12	mitochondrial ribosomal protein S12		12.13
P13640	MT1G	metallothionein 1G		12.13
Q8N104	DEFB106B	defensin beta 106B		11.36
P16619	CCL3L3	chemokine (C-C motif) ligand 3-like 3		11.1
Q16663	CCL15	chemokine (C-C motif) ligand 15		10.85
Q9Y258	CCL26	chemokine (C-C motif) ligand 26		10.41
P55774	CCL18	chemokine (C-C motif) ligand 18		10.32
P58062	SPINK7	serine peptidase inhibitor, Kazal type 7 (putative)	10.26
O60831	PRAF2	PRA1 domain family member 2		10.1
P22362	CCL1	chemokine (C-C motif) ligand 1		9.93
P80075	CCL8	chemokine (C-C motif) ligand 8		9.83
P10720	PF4V1	platelet factor 4 variant 1		9.7
P78423	CX3CL1	chemokine (C-X3-C motif) ligand 1		9.67
Q99616	CCL13	chemokine (C-C motif) ligand 13		9.49
Q04118	PRB3	proline-rich protein BstNI subfamily 3			9.39
P02795	MT2A	metallothionein 2A		9.38
Q16627	CCL14	chemokine (C-C motif) ligand 14		8.86
O00590	ACKR2	atypical chemokine receptor 2		8.69
P10632	CYP2C8	cytochrome P450 family 2 subfamily C member 8	8.46
P33260	CYP2C18	cytochrome P450 family 2 subfamily C member 18	8.46
O00421	CCRL2	chemokine (C-C motif) receptor-like 2		8.44
P33261	CYP2C19	cytochrome P450 family 2 subfamily C member 19	8.33
P11712	CYP2C9	cytochrome P450 family 2 subfamily C member 9	8.33
P80098	CCL7	chemokine (C-C motif) ligand 7		7.93
P05177	CYP1A2	cytochrome P450 family 1 subfamily A member 2	7.83
Q12908	SLC10A2	solute carrier family 10 (sodium/bile acid cotransporter), member 2			7.8
P05181	CYP2E1	cytochrome P450 family 2 subfamily E member 1	7.64
Q9NPB9	ACKR4	atypical chemokine receptor 4		7.62
P10147	CCL3	chemokine (C-C motif) ligand 3		7.35
P49238	CX3CR1	chemokine (C-X3-C motif) receptor 1		7.07
P84074	HPCA	hippocalcin		6.88
P08684	CYP3A4	cytochrome P450 family 3 subfamily A member 4	6.82
O15444	CCL25	chemokine (C-C motif) ligand 25		6.8
Q99731	CCL19	chemokine (C-C motif) ligand 19		6.78
Q16678	CYP1B1	cytochrome P450 family 1 subfamily B member 1	6.74
Q16570	ACKR1	atypical chemokine receptor 1 (Duffy blood group)		6.71
P80162	CXCL6	chemokine (C-X-C motif) ligand 6		6.55
Q9H7B4	SMYD3	SET and MYND domain containing 3		6.54
P04798	CYP1A1	cytochrome P450 family 1 subfamily A member 1	6.53
P47992	XCL1	chemokine (C motif) ligand 1		6.47
Q9UBD3	XCL2	chemokine (C motif) ligand 2		6.47
P32246	CCR1	chemokine (C-C motif) receptor 1		6.45
P19876	CXCL3	chemokine (C-X-C motif) ligand 3		6.43
Q04900	CD164	CD164 molecule, sialomucin		6.41
O15467	CCL16	chemokine (C-C motif) ligand 16		6.37
Q9NRJ3	CCL28	chemokine (C-C motif) ligand 28		6.35
P51686	CCR9	chemokine (C-C motif) receptor 9		6.33
O00585	CCL21	chemokine (C-C motif) ligand 21		6.32
P27487	DPP4	dipeptidyl-peptidase 4		6.29
P41597	CCR2	chemokine (C-C motif) receptor 2		6.22
P46092	CCR10	chemokine (C-C motif) receptor 10		6.2
P51679	CCR4	chemokine (C-C motif) receptor 4		6.2
P51685	CCR8	chemokine (C-C motif) receptor 8		6.2
Q9Y4X3	CCL27	chemokine (C-C motif) ligand 27		6.18
P02775	PPBP	pro-platelet basic protein		6.16
Q07325	CXCL9	chemokine (C-X-C motif) ligand 9		6.16
P46094	XCR1	chemokine (C motif) receptor 1		6.13
P55773	CCL23	chemokine (C-C motif) ligand 23		6.11
P19875	CXCL2	chemokine (C-X-C motif) ligand 2		5.94
P07099	EPHX1	epoxide hydrolase 1, microsomal (xenobiotic)	5.89
P32302	CXCR5	chemokine (C-X-C motif) receptor 5		5.86
Q9BZ71	PITPNM3	PITPNM family member 3		5.84
P02776	PF4	platelet factor 4		5.81
P13236	CCL4	chemokine (C-C motif) ligand 4		5.81
O60488	ACSL4	acyl-CoA synthetase long-chain family member 4		5.77
Q5FVE4	ACSBG2	acyl-CoA synthetase bubblegum family member 2		5.77
Q9ULC5	ACSL5	acyl-CoA synthetase long-chain family member 5		5.77
P33121	ACSL1	acyl-CoA synthetase long-chain family member 1		5.77
P42830	CXCL5	chemokine (C-X-C motif) ligand 5		5.67
O14625	CXCL11	chemokine (C-X-C motif) ligand 11		5.62
P54868	HMGCS2	3-hydroxy-3-methylglutaryl-CoA synthase 2 (mitochondrial)		5.6
P23786	CPT2	carnitine palmitoyltransferase 2		5.6
P48163	ME1	malic enzyme 1, NADP(+)-dependent, cytosolic		5.6
O15254	ACOX3	acyl-CoA oxidase 3, pristanoyl		5.35
Q99424	ACOX2	acyl-CoA oxidase 2, branched chain		5.35
Q99650	OSMR	oncostatin M receptor		5.29
P09341	CXCL1	chemokine (C-X-C motif) ligand 1 (melanoma growth stimulating activity, alpha)		5.25
Q0VD83	APOBR	apolipoprotein B receptor		5.25
Q9BV79	MECR	mitochondrial trans-2-enoyl-CoA reductase		5.25
P07108	DBI	diazepam binding inhibitor (GABA receptor modulator, acyl-CoA binding protein)		5.2
P09110	ACAA1	acetyl-CoA acyltransferase 1		5.2
Q86SK9	SCD5	stearoyl-CoA desaturase 5		5.2
P81534	DEFB103B	defensin beta 103B		5.2
Q6P1M0	SLC27A4	solute carrier family 27 (fatty acid transporter), member 4		5.2
O14520	AQP7	aquaporin 7		5.19
P25024	CXCR1	chemokine (C-X-C motif) receptor 1		5.18
Q8WTQ7	GRK7	G protein-coupled receptor kinase 7		5.16
Q8TCG5	CPT1C	carnitine palmitoyltransferase 1C		5.13
P78556	CCL20	chemokine (C-C motif) ligand 20		5.13
Q6UXL0	IL20RB	interleukin 20 receptor subunit beta		5.12
P32298	GRK4	G protein-coupled receptor kinase 4		5.1
P43250	GRK6	G protein-coupled receptor kinase 6		5.09
Q8N6P7	IL22RA1	interleukin 22 receptor subunit alpha 1		5.05
P05451	REG1A	regenerating family member 1 alpha		5.04
P05187	ALPP	alkaline phosphatase, placental		5.02
Q15835	GRK1	G protein-coupled receptor kinase 1		5.01
Q08334	IL10RB	interleukin 10 receptor subunit beta		4.96
P14735	IDE	insulin-degrading enzyme		4.96
P35626	ADRBK2	adrenergic, beta, receptor kinase 2		4.93
P40199	CEACAM6	carcinoembryonic antigen-related cell adhesion molecule 6 (non-specific cross reacting antigen)		4.92
Q86W42	THOC6	THO complex 6		4.91
P25025	CXCR2	chemokine (C-X-C motif) receptor 2		4.9
Q9Y6L6	SLCO1B1	solute carrier organic anion transporter family member 1B1			4.89
Q9NPD5	SLCO1B3	solute carrier organic anion transporter family member 1B3			4.89
Q969J5	IL22RA2	interleukin 22 receptor subunit alpha 2		4.84
P16871	IL7R	interleukin 7 receptor		4.84
Q9HC73	CRLF2	cytokine receptor-like factor 2		4.82
P42702	LIFR	leukemia inhibitory factor receptor alpha		4.8
Q8IU57	IFNLR1	interferon, lambda receptor 1		4.79
P55899	FCGRT	Fc fragment of IgG, receptor, transporter, alpha			4.71
Q8TD46	CD200R1	CD200 receptor 1		4.71
P20933	AGA	aspartylglucosaminidase			4.66
O95864	FADS2	fatty acid desaturase 2		4.65
Q9H9T3	ELP3	elongator acetyltransferase complex subunit 3		4.64
Q8TE02	ELP5	elongator acetyltransferase complex subunit 5		4.64
Q8N6G6	ADAMTSL1	ADAMTS like 1	4.6
P48551	IFNAR2	interferon (alpha, beta and omega) receptor 2		4.58
P34947	GRK5	G protein-coupled receptor kinase 5		4.57
Q9UHF4	IL20RA	interleukin 20 receptor subunit alpha		4.52
Q8TE69	CXorf40A	chromosome X open reading frame 40A	4.51
P32189	GK	glycerol kinase		4.49
P22307	SCP2	sterol carrier protein 2		4.46
Q99062	CSF3R	colony stimulating factor 3 receptor		4.46
Q02928	CYP4A11	cytochrome P450 family 4 subfamily A member 11		4.42
P38571	LIPA	lipase A, lysosomal acid, cholesterol esterase		4.42
Q13261	IL15RA	interleukin 15 receptor subunit alpha		4.39
P11310	ACADM	acyl-CoA dehydrogenase, C-4 to C-12 straight chain		4.36
P78380	OLR1	oxidized low density lipoprotein (lectin-like) receptor 1		4.33
Q9ULD2	MTUS1	microtubule associated tumor suppressor 1		4.29
P13725	OSM	oncostatin M		4.28
O95573	ACSL3	acyl-CoA synthetase long-chain family member 3		4.26
P16471	PRLR	prolactin receptor		4.25
Q6IA86	ELP2	elongator acetyltransferase complex subunit 2		4.22
P52333	JAK3	Janus kinase 3		4.19
Q96EB1	ELP4	elongator acetyltransferase complex subunit 4		4.18
Q86T82	USP37	ubiquitin specific peptidase 37			4.18
Q13651	IL10RA	interleukin 10 receptor subunit alpha		4.17
P50416	CPT1A	carnitine palmitoyltransferase 1A (liver)		4.17
P26992	CNTFR	ciliary neurotrophic factor receptor		4.13
Q6ZQW0	IDO2	indoleamine 2,3-dioxygenase 2		4.13
O14512	SOCS7	suppressor of cytokine signaling 7		4.12
O15263	DEFB4A	defensin beta 4A		4.11
Q14626	IL11RA	interleukin 11 receptor subunit alpha		4.08
Q8N608	DPP10	dipeptidyl-peptidase 10 (inactive)		4.07
Q14847	LASP1	LIM and SH3 protein 1		4.04
P22680	CYP7A1	cytochrome P450 family 7 subfamily A member 1		4.04
P17181	IFNAR1	interferon (alpha, beta and omega) receptor 1		4.02
O75159	SOCS5	suppressor of cytokine signaling 5		4.01
P38484	IFNGR2	interferon gamma receptor 2 (interferon gamma transducer 1)		4
P78552	IL13RA1	interleukin 13 receptor subunit alpha 1		3.99
Q0PNE2	ELP6	elongator acetyltransferase complex subunit 6		3.99
Q5D862	FLG2	filaggrin family member 2	3.95
O14874	BCKDK	branched chain ketoacid dehydrogenase kinase		3.95
P25098	ADRBK1	adrenergic, beta, receptor kinase 1		3.95
P09919	CSF3	colony stimulating factor 3		3.94
Q9ULD0	OGDHL	oxoglutarate dehydrogenase-like		3.89
Q9Y5X9	LIPG	lipase, endothelial		3.89
Q8TE76	MORC4	MORC family CW-type zinc finger 4		3.89
Q6ZNG9	KRBA2	KRAB-A domain containing 2		3.89
Q8WXH5	SOCS4	suppressor of cytokine signaling 4		3.87
P16050	ALOX15	arachidonate 15-lipoxygenase		3.85
P15260	IFNGR1	interferon gamma receptor 1		3.84
P26951	IL3RA	interleukin 3 receptor subunit alpha		3.83
P14902	IDO1	indoleamine 2,3-dioxygenase 1		3.82
Q14627	IL13RA2	interleukin 13 receptor subunit alpha 2		3.81
Q9ULQ1	TPCN1	two pore segment channel 1	3.81
Q96J01	THOC3	THO complex 3		3.8
Q5VWK5	IL23R	interleukin 23 receptor		3.79
Q15067	ACOX1	acyl-CoA oxidase 1, palmitoyl		3.79
O00587	MFNG	MFNG O-fucosylpeptide 3-beta-N-acetylglucosaminyltransferase		3.78
Q8NBL1	POGLUT1	protein O-glucosyltransferase 1		3.78
Q9H488	POFUT1	protein O-fucosyltransferase 1		3.78
Q8N9I9	DTX3	deltex 3, E3 ubiquitin ligase		3.78
Q9BY76	ANGPTL4	angiopoietin like 4		3.76
Q16619	CTF1	cardiotrophin 1		3.76
P10912	GHR	growth hormone receptor		3.76
O00767	SCD	stearoyl-CoA desaturase (delta-9-desaturase)		3.75
P48061	CXCL12	chemokine (C-X-C motif) ligand 12		3.75
Q6I9Y2	THOC7	THO complex 7		3.75
P55058	PLTP	phospholipid transfer protein		3.74
P01562	IFNA1	interferon, alpha 1		3.7
P57730	CARD18	caspase recruitment domain family member 18		3.68
O14508	SOCS2	suppressor of cytokine signaling 2		3.67
Q9GZX6	IL22	interleukin 22		3.67
Q8NDV2	GPR26	G protein-coupled receptor 26		3.66
Q9NZH6	IL37	interleukin 37		3.66
Q9UHD0	IL19	interleukin 19		3.66
P05013	IFNA6	interferon, alpha 6		3.64
P01568	IFNA21	interferon, alpha 21		3.64
P01569	IFNA5	interferon, alpha 5		3.64
P01571	IFNA17	interferon, alpha 17		3.64
P01567	IFNA7	interferon, alpha 7		3.64
P01566	IFNA10	interferon, alpha 10		3.64
P32881	IFNA8	interferon, alpha 8		3.64
P42658	DPP6	dipeptidyl-peptidase 6		3.63
Q9HBE4	IL21	interleukin 21		3.62
P19235	EPOR	erythropoietin receptor		3.61
P02790	HPX	hemopexin			3.6
P61073	CXCR4	chemokine (C-X-C motif) receptor 4		3.6
P40189	IL6ST	interleukin 6 signal transducer		3.59
P36952	SERPINB5	serpin peptidase inhibitor, clade B (ovalbumin), member 5		3.59
O14983	ATP2A1	ATPase, Ca++ transporting, cardiac muscle, fast twitch 1		3.57
P07911	UMOD	uromodulin		3.56
Q13769	THOC5	THO complex 5		3.54
P01563	IFNA2	interferon, alpha 2		3.54
P40238	MPL	MPL proto-oncogene, thrombopoietin receptor		3.54
P01570	IFNA14	interferon, alpha 14		3.54
P07204	THBD	thrombomodulin		3.51
P06744	GPI	glucose-6-phosphate isomerase		3.51
P43681	CHRNA4	cholinergic receptor, nicotinic alpha 4		3.51
P05014	IFNA4	interferon, alpha 4		3.44
Q99983	OMD	osteomodulin	3.44
O60938	KERA	keratocan	3.44
P13232	IL7	interleukin 7		3.38
Q14116	IL18	interleukin 18		3.37
Q9UK17	KCND3	potassium channel, voltage gated Shal related subfamily D, member 3		3.36
Q4VC05	BCL7A	B-cell CLL/lymphoma 7A		3.32
Q9NYX4	CALY	calcyon neuron-specific vesicular protein		3.32
P21754	ZP3	zona pellucida glycoprotein 3 (sperm receptor)	3.29
O95998	IL18BP	interleukin 18 binding protein		3.28
Q5T2W1	PDZK1	PDZ domain containing 1			3.28
Q7Z5G4	GOLGA7	golgin A7			3.26
Q9NSE2	CISH	cytokine inducible SH2-containing protein		3.25
P61952	GNG11	guanine nucleotide binding protein (G protein), gamma 11		3.2
P50151	GNG10	guanine nucleotide binding protein (G protein), gamma 10		3.2
Q8NI27	THOC2	THO complex 2		3.18
P17787	CHRNB2	cholinergic receptor, nicotinic beta 2		3.18
Q86W26	NLRP10	NLR family, pyrin domain containing 10		3.17
O14775	GNB5	guanine nucleotide binding protein (G protein), beta 5		3.17
Q8NES3	LFNG	LFNG O-fucosylpeptide 3-beta-N-acetylglucosaminyltransferase		3.17
O95256	IL18RAP	interleukin 18 receptor accessory protein		3.15
Q7Z7M8	B3GNT8	UDP-GlcNAc:betaGal beta-1,3-N-acetylglucosaminyltransferase 8	3.14
Q9UJ37	ST6GALNAC2	ST6 (alpha-N-acetyl-neuraminyl-2,3-beta-galactosyl-1,3)-N-acetylgalactosaminide alpha-2,6-sialyltransferase 2	3.14
Q9BYG0	B3GNT5	UDP-GlcNAc:betaGal beta-1,3-N-acetylglucosaminyltransferase 5	3.14
Q02742	GCNT1	glucosaminyl (N-acetyl) transferase 1, core 2	3.14
Q6ZMB0	B3GNT6	UDP-GlcNAc:betaGal beta-1,3-N-acetylglucosaminyltransferase 6	3.14
P05814	CSN2	casein beta		3.13
P35243	RCVRN	recoverin		3.12
P01236	PRL	prolactin		3.12
Q9HAV0	GNB4	guanine nucleotide binding protein (G protein), beta polypeptide 4		3.11
Q8NEV9	IL27	interleukin 27		3.1
Q9H8N7	ZNF395	zinc finger protein 395		3.1
P20774	OGN	osteoglycin	3.09
P16520	GNB3	guanine nucleotide binding protein (G protein), beta polypeptide 3		3.09
Q01629	IFITM2	interferon induced transmembrane protein 2		3.09
P62879	GNB2	guanine nucleotide binding protein (G protein), beta polypeptide 2		3.09
Q06828	FMOD	fibromodulin	3.09
Q8IY21	DDX60	DEAD (Asp-Glu-Ala-Asp) box polypeptide 60		3.09
Q68CZ1	RPGRIP1L	RPGRIP1-like			3.09
Q9NPF7	IL23A	interleukin 23 subunit alpha		3.09
P16989	YBX3	Y-box binding protein 3		3.08
P01241	GH1	growth hormone 1		3.08
P01242	GH2	growth hormone 2		3.07
O60262	GNG7	guanine nucleotide binding protein (G protein), gamma 7		3.07
P63218	GNG5	guanine nucleotide binding protein (G protein), gamma 5		3.07
P50150	GNG4	guanine nucleotide binding protein (G protein), gamma 4		3.05
Q5H8C1	FREM1	FRAS1 related extracellular matrix 1		3.05
Q8WX94	NLRP7	NLR family, pyrin domain containing 7		3.05
Q92824	PCSK5	proprotein convertase subtilisin/kexin type 5		3.05
Q8NAC3	IL17RC	interleukin 17 receptor C		3.01
Q15848	ADIPOQ	adiponectin, C1Q and collagen domain containing		3.01
Q56P42	PYDC2	pyrin domain containing 2		3
Q9UBI6	GNG12	guanine nucleotide binding protein (G protein), gamma 12		3
Q8NB16	MLKL	mixed lineage kinase domain-like		3
P23458	JAK1	Janus kinase 1		2.99
P84085	ARF5	ADP ribosylation factor 5			2.99
Q9BR39	JPH2	junctophilin 2	2.98
O75923	DYSF	dysferlin	2.98
P10145	CXCL8	chemokine (C-X-C motif) ligand 8		2.98
Q969E3	UCN3	urocortin 3		2.98
O43663	PRC1	protein regulator of cytokinesis 1			2.97
Q8TCY5	MRAP	melanocortin 2 receptor accessory protein		2.97
Q8IXK2	GALNT12	polypeptide N-acetylgalactosaminyltransferase 12	2.96
Q86SF2	GALNT7	polypeptide N-acetylgalactosaminyltransferase 7	2.96
Q8NCW6	GALNT11	polypeptide N-acetylgalactosaminyltransferase 11	2.96
P48357	LEPR	leptin receptor		2.96
Q10472	GALNT1	polypeptide N-acetylgalactosaminyltransferase 1	2.96
Q96FL9	GALNT14	polypeptide N-acetylgalactosaminyltransferase 14	2.96
Q10471	GALNT2	polypeptide N-acetylgalactosaminyltransferase 2	2.96
Q9NS00	C1GALT1	core 1 synthase, glycoprotein-N-acetylgalactosamine 3-beta-galactosyltransferase 1	2.96
Q8N4A0	GALNT4	polypeptide N-acetylgalactosaminyltransferase 4	2.96
Q86SR1	GALNT10	polypeptide N-acetylgalactosaminyltransferase 10	2.96
Q13367	AP3B2	adaptor related protein complex 3, beta 2 subunit			2.95
P25815	S100P	S100 calcium binding protein P	2.95
Q15751	HERC1	HECT and RLD domain containing E3 ubiquitin protein ligase family member 1			2.95
O43679	LDB2	LIM domain binding 2		2.93
P15907	ST6GAL1	ST6 beta-galactosamide alpha-2,6-sialyltranferase 1	2.92
P31944	CASP14	caspase 14		2.9
Q08426	EHHADH	enoyl-CoA, hydratase/3-hydroxyacyl CoA dehydrogenase		2.89
P08754	GNAI3	guanine nucleotide binding protein (G protein), alpha inhibiting activity polypeptide 3		2.89
Q29980	MICB	MHC class I polypeptide-related sequence B		2.88
P04632	CAPNS1	calpain, small subunit 1		2.87
P19971	TYMP	thymidine phosphorylase		2.84
P23381	WARS	tryptophanyl-tRNA synthetase		2.84
Q8TCS8	PNPT1	polyribonucleotide nucleotidyltransferase 1		2.84
Q9BVA1	TUBB2B	tubulin beta 2B class IIb			2.84
Q9Y5B8	NME7	NME/NM23 family member 7	2.83
P04899	GNAI2	guanine nucleotide binding protein (G protein), alpha inhibiting activity polypeptide 2		2.83
P51148	RAB5C	RAB5C, member RAS oncogene family			2.83
P59768	GNG2	guanine nucleotide binding protein (G protein), gamma 2		2.82
Q5H9I0	TFDP3	transcription factor Dp family member 3		2.82
Q9Y3B7	MRPL11	mitochondrial ribosomal protein L11		2.81
Q6P1A2	LPCAT3	lysophosphatidylcholine acyltransferase 3		2.81
Q96S52	PIGS	phosphatidylinositol glycan anchor biosynthesis class S		2.81
O43314	PPIP5K2	diphosphoinositol pentakisphosphate kinase 2		2.81
Q969N2	PIGT	phosphatidylinositol glycan anchor biosynthesis class T		2.81
P23469	PTPRE	protein tyrosine phosphatase, receptor type, E		2.81
Q8N428	GALNT16	polypeptide N-acetylgalactosaminyltransferase 16	2.81
Q14435	GALNT3	polypeptide N-acetylgalactosaminyltransferase 3	2.8
Q9NRF2	SH2B1	SH2B adaptor protein 1		2.8
Q7Z7M9	GALNT5	polypeptide N-acetylgalactosaminyltransferase 5	2.8
P62873	GNB1	guanine nucleotide binding protein (G protein), beta polypeptide 1		2.8
Q9NPP4	NLRC4	NLR family, CARD domain containing 4		2.79
Q96EY7	PTCD3	pentatricopeptide repeat domain 3			2.79
P20338	RAB4A	RAB4A, member RAS oncogene family			2.79
P63096	GNAI1	guanine nucleotide binding protein (G protein), alpha inhibiting activity polypeptide 1		2.79
Q5EG05	CARD16	caspase recruitment domain family member 16		2.79
O43699	SIGLEC6	sialic acid binding Ig-like lectin 6		2.79
Q99572	P2RX7	purinergic receptor P2X, ligand gated ion channel, 7		2.78
Q8IU54	IFNL1	interferon, lambda 1		2.78
Q9UJY5	GGA1	golgi-associated, gamma adaptin ear containing, ARF binding protein 1			2.77
P36544	CHRNA7	cholinergic receptor, nicotinic alpha 7		2.77
Q02318	CYP27A1	cytochrome P450 family 27 subfamily A member 1		2.77
P01574	IFNB1	interferon, beta 1, fibroblast		2.77
P53367	ARFIP1	ADP ribosylation factor interacting protein 1			2.76
Q13075	NAIP	NLR family, apoptosis inhibitory protein		2.73
Q96F24	NRBF2	nuclear receptor binding factor 2		2.73
Q9NZ52	GGA3	golgi-associated, gamma adaptin ear containing, ARF binding protein 3			2.72
Q9UMZ2	SYNRG	synergin, gamma			2.72
Q9NPH3	IL1RAP	interleukin 1 receptor accessory protein		2.72
Q13509	TUBB3	tubulin beta 3 class III			2.71
Q8IUX4	APOBEC3F	apolipoprotein B mRNA editing enzyme, catalytic polypeptide-like 3F		2.71
P13473	LAMP2	lysosomal-associated membrane protein 2			2.71
P29122	PCSK6	proprotein convertase subtilisin/kexin type 6		2.71
P05204	HMGN2	high mobility group nucleosomal binding domain 2		2.71
Q9H4B7	TUBB1	tubulin beta 1 class VI			2.7
Q92665	MRPS31	mitochondrial ribosomal protein S31		2.69
P30501	HLA-C	major histocompatibility complex, class I, C			2.69
O14862	AIM2	absent in melanoma 2		2.69
P61204	ARF3	ADP ribosylation factor 3			2.69
Q9H1C4	UNC93B1	unc-93 homolog B1 (C. elegans)	2.69
Q07000	HLA-C	major histocompatibility complex, class I, C			2.69
Q12968	NFATC3	nuclear factor of activated T-cells, cytoplasmic, calcineurin-dependent 3		2.69
P04222	HLA-C	major histocompatibility complex, class I, C			2.69
Q95604	HLA-C	major histocompatibility complex, class I, C			2.69
P30504	HLA-C	major histocompatibility complex, class I, C			2.69
Q9ULV8	CBLC	Cbl proto-oncogene C, E3 ubiquitin protein ligase		2.68
Q13492	PICALM	phosphatidylinositol binding clathrin assembly protein			2.68
Q9BYH8	NFKBIZ	nuclear factor of kappa light polypeptide gene enhancer in B-cells inhibitor, zeta		2.68
P10319	HLA-B	major histocompatibility complex, class I, B			2.67
P30480	HLA-B	major histocompatibility complex, class I, B			2.67
P30492	HLA-B	major histocompatibility complex, class I, B			2.67
Q95365	HLA-B	major histocompatibility complex, class I, B			2.67
P30488	HLA-B	major histocompatibility complex, class I, B			2.67
P30498	HLA-B	major histocompatibility complex, class I, B			2.67
Q04826	HLA-B	major histocompatibility complex, class I, B			2.67
P30462	HLA-B	major histocompatibility complex, class I, B			2.67
P30479	HLA-B	major histocompatibility complex, class I, B			2.67
P03989	HLA-B	major histocompatibility complex, class I, B			2.67
P30487	HLA-B	major histocompatibility complex, class I, B			2.67
P30490	HLA-B	major histocompatibility complex, class I, B			2.67
P30461	HLA-B	major histocompatibility complex, class I, B			2.67
P30486	HLA-B	major histocompatibility complex, class I, B			2.67
P30464	HLA-B	major histocompatibility complex, class I, B			2.67
P30485	HLA-B	major histocompatibility complex, class I, B			2.67
P30466	HLA-B	major histocompatibility complex, class I, B			2.67
P01889	HLA-B	major histocompatibility complex, class I, B			2.67
Q31612	HLA-B	major histocompatibility complex, class I, B			2.67
Q29836	HLA-B	major histocompatibility complex, class I, B			2.67
P18464	HLA-B	major histocompatibility complex, class I, B			2.67
Q29940	HLA-B	major histocompatibility complex, class I, B			2.67
Q9BUF5	TUBB6	tubulin beta 6 class V			2.67
P30493	HLA-B	major histocompatibility complex, class I, B			2.67
P30484	HLA-B	major histocompatibility complex, class I, B			2.67
P30475	HLA-B	major histocompatibility complex, class I, B			2.67
P30685	HLA-B	major histocompatibility complex, class I, B			2.67
Q29718	HLA-B	major histocompatibility complex, class I, B			2.67
P18463	HLA-B	major histocompatibility complex, class I, B			2.67
P18465	HLA-B	major histocompatibility complex, class I, B			2.67
P30495	HLA-B	major histocompatibility complex, class I, B			2.67
P30483	HLA-B	major histocompatibility complex, class I, B			2.67
P30481	HLA-B	major histocompatibility complex, class I, B			2.67
P30460	HLA-B	major histocompatibility complex, class I, B			2.67
P30491	HLA-B	major histocompatibility complex, class I, B			2.67
Q31610	HLA-B	major histocompatibility complex, class I, B			2.67
P40261	NNMT	nicotinamide N-methyltransferase		2.66
P10321	HLA-C	major histocompatibility complex, class I, C			2.66
Q92896	GLG1	golgi glycoprotein 1		2.66
O95295	SNAPIN	SNAP-associated protein			2.64
Q9Y286	SIGLEC7	sialic acid binding Ig-like lectin 7		2.64
Q9UBD9	CLCF1	cardiotrophin-like cytokine factor 1		2.64
Q9NRD9	DUOX1	dual oxidase 1		2.62
Q12912	LRMP	lymphoid-restricted membrane protein		2.62
P29120	PCSK1	proprotein convertase subtilisin/kexin type 1		2.62
Q01344	IL5RA	interleukin 5 receptor subunit alpha		2.61
Q03393	PTS	6-pyruvoyltetrahydropterin synthase	2.61
P52630	STAT2	signal transducer and activator of transcription 2		2.61
Q93084	ATP2A3	ATPase, Ca++ transporting, ubiquitous		2.61
P35270	SPR	sepiapterin reductase (7,8-dihydrobiopterin:NADP+ oxidoreductase)	2.61
Q14872	MTF1	metal-regulatory transcription factor 1			2.61
Q9NUP1	BLOC1S4	biogenesis of lysosomal organelles complex-1, subunit 4, cappuccino			2.6
Q9UL45	BLOC1S6	biogenesis of lysosomal organelles complex-1, subunit 6, pallidin			2.6
Q16739	UGCG	UDP-glucose ceramide glucosyltransferase		2.6
P38405	GNAL	guanine nucleotide binding protein (G protein), alpha activating activity polypeptide, olfactory type		2.6
P18428	LBP	lipopolysaccharide binding protein		2.6
O95672	ECEL1	endothelin converting enzyme-like 1		2.6
Q13568	IRF5	interferon regulatory factor 5		2.59
Q460N5	PARP14	poly(ADP-ribose) polymerase family member 14		2.59
P01588	EPO	erythropoietin		2.59
O60749	SNX2	sorting nexin 2			2.58
P48544	KCNJ5	potassium channel, inwardly rectifying subfamily J, member 5		2.57
Q13007	IL24	interleukin 24		2.56
O95833	CLIC3	chloride intracellular channel 3		2.56
P49888	SULT1E1	sulfotransferase family 1E member 1	2.55
O15118	NPC1	Niemann-Pick disease, type C1		2.54
Q15363	TMED2	transmembrane p24 trafficking protein 2		2.54
P30740	SERPINB1	serpin peptidase inhibitor, clade B (ovalbumin), member 1		2.54
Q9Y6R0	NUMBL	numb homolog (Drosophila)-like		2.54
P48549	KCNJ3	potassium channel, inwardly rectifying subfamily J, member 3		2.53
P51449	RORC	RAR-related orphan receptor C		2.53
Q86VZ5				2.53
Q8IWV1	LAX1	lymphocyte transmembrane adaptor 1			2.52
P50052	AGTR2	angiotensin II receptor, type 2		2.52
P48051	KCNJ6	potassium channel, inwardly rectifying subfamily J, member 6		2.52
P08700	IL3	interleukin 3		2.52
Q8NI22	MCFD2	multiple coagulation factor deficiency 2		2.52
Q5NUL3	FFAR4	free fatty acid receptor 4		2.52
P13611	VCAN	versican		2.52
O00631	SLN	sarcolipin		2.5
P53675	CLTCL1	clathrin, heavy chain-like 1		2.5
P51888	PRELP	proline/arginine-rich end leucine-rich repeat protein	2.5
P42226	STAT6	signal transducer and activator of transcription 6, interleukin-4 induced		2.5
Q96FV9	THOC1	THO complex 1		2.5
P25106	ACKR3	atypical chemokine receptor 3		2.49
Q8NEF9	SRFBP1	serum response factor binding protein 1		2.49
P51884	LUM	lumican	2.48
P62760	VSNL1	visinin like 1		2.48
P30679	GNA15	guanine nucleotide binding protein (G protein), alpha 15 (Gq class)		2.47
P63092	GNAS	GNAS complex locus		2.47
Q9UBX8	B4GALT6	UDP-Gal:betaGlcNAc beta 1,4- galactosyltransferase, polypeptide 6	2.47
Q9NY97	B3GNT2	UDP-GlcNAc:betaGal beta-1,3-N-acetylglucosaminyltransferase 2	2.47
Q01628	IFITM3	interferon induced transmembrane protein 3		2.47
Q9Y2A9	B3GNT3	UDP-GlcNAc:betaGal beta-1,3-N-acetylglucosaminyltransferase 3	2.47
Q5JWF2	GNAS	GNAS complex locus		2.47
Q9H596	DUSP21	dual specificity phosphatase 21		2.46
Q8NEJ0	DUSP18	dual specificity phosphatase 18		2.46
P24386	CHM	choroideremia (Rab escort protein 1)			2.46
P15509	CSF2RA	colony stimulating factor 2 receptor, alpha, low-affinity (granulocyte-macrophage)		2.45
P23490	LOR	loricrin			2.44
O75144	ICOSLG	inducible T-cell co-stimulator ligand			2.44
P20809	IL11	interleukin 11		2.44
Q99612	KLF6	Kruppel-like factor 6		2.43
P84996	GNAS	GNAS complex locus		2.43
Q9HB58	SP110	SP110 nuclear body protein		2.43
P61278	SST	somatostatin		2.42
Q9BQS6	HSPB9	heat shock protein family B (small) member 9			2.42
Q9BVA0	KATNB1	katanin p80 (WD repeat containing) subunit B 1			2.42
P09543	CNP	2',3'-cyclic nucleotide 3' phosphodiesterase		2.41
P04080	CSTB	cystatin B			2.41
O75363	BCAS1	breast carcinoma amplified sequence 1			2.41
Q4U2R8	SLC22A6	solute carrier family 22 (organic anion transporter), member 6		2.41
Q6ZMV9	KIF6	kinesin family member 6		2.41
Q14159	SPIDR	scaffolding protein involved in DNA repair		2.4
P22466	GAL	galanin/GMAP prepropeptide		2.4
Q6QNY0	BLOC1S3	biogenesis of lysosomal organelles complex-1, subunit 3			2.4
Q9NZN4	EHD2	EH domain containing 2			2.39
Q16829	DUSP7	dual specificity phosphatase 7		2.39
Q9H490	PIGU	phosphatidylinositol glycan anchor biosynthesis class U		2.39
P49146	NPY2R	neuropeptide Y receptor Y2		2.39
P25929	NPY1R	neuropeptide Y receptor Y1		2.39
O43292	GPAA1	glycosylphosphatidylinositol anchor attachment 1		2.39
P48146	NPBWR2	neuropeptides B/W receptor 2		2.38
P01298	PPY	pancreatic polypeptide		2.38
Q29983	MICA	MHC class I polypeptide-related sequence A		2.38
P48145	NPBWR1	neuropeptides B/W receptor 1		2.38
Q8NG41	NPB	neuropeptide B		2.38
Q9NSY2	STARD5	StAR related lipid transfer domain containing 5		2.38
Q13885	TUBB2A	tubulin beta 2A class IIa			2.38
Q9BZM6	ULBP1	UL16 binding protein 1		2.38
P10082	PYY	peptide YY		2.38
Q9BZM4	ULBP3	UL16 binding protein 3		2.38
Q8TD07	RAET1E	retinoic acid early transcript 1E		2.38
P11168	SLC2A2	solute carrier family 2 (facilitated glucose transporter), member 2		2.38
P29992	GNA11	guanine nucleotide binding protein (G protein), alpha 11 (Gq class)		2.38
Q8N729	NPW	neuropeptide W		2.38
P50148	GNAQ	guanine nucleotide binding protein (G protein), q polypeptide		2.37
Q8TDU9	RXFP4	relaxin/insulin-like family peptide receptor 4		2.37
P01583	IL1A	interleukin 1 alpha		2.36
P32456	GBP2	guanylate binding protein 2, interferon-inducible		2.36
P09326	CD48	CD48 molecule			2.35
Q9ULZ3	PYCARD	PYD and CARD domain containing		2.35
Q13519	PNOC	prepronociceptin		2.35
P41159	LEP	leptin		2.34
Q9Y274	ST3GAL6	ST3 beta-galactoside alpha-2,3-sialyltransferase 6		2.33
A0MZ66	SHTN1	shootin 1			2.33
Q2M2I8	AAK1	AP2 associated kinase 1			2.33
Q9BXJ7	AMN	amnion associated transmembrane protein	2.33
P00813	ADA	adenosine deaminase		2.33
O15432	SLC31A2	solute carrier family 31 (copper transporter), member 2		2.33
O43603	GALR2	galanin receptor 2		2.32
Q6NXE6	ARMC6	armadillo repeat containing 6			2.32
Q13342	SP140	SP140 nuclear body protein		2.32
Q9Y5Q6	INSL5	insulin like 5		2.32
P32927	CSF2RB	colony stimulating factor 2 receptor, beta, low-affinity (granulocyte-macrophage)		2.32
P47211	GALR1	galanin receptor 1		2.32
Q9NX02	NLRP2	NLR family, pyrin domain containing 2		2.32
