# Supplementary material for: Computational analysis of multimorbidity between asthma, eczema and rhinitis
Source: PLoS One. 2017 Jun 9;12(6):e0179125. doi: 10.1371/journal.pone.0179125 (PMC5466323; doi:10.1371/journal.pone.0179125)
Supplement: S13 Table — Gene names are provided as common gene names and protein names as UniProt accessions. NetZcore prediction scores are shown as z-scores. Proteins are ranked according to their average z-score for all diseases. Empty cell: the protein was not predicted to be associated with the disease with z-score > 2.31 (corresponding to P < 0.01). Exp: the protein is experimentally known to be associated to the disease. Proteins predicted (or experimentally known) to be associated to more than one disease are candidates to multimorbidity. (XLS) [file pone.0179125.s024.xls]

## Sheet: Sheet1
UniProt accession	Gene name	Protein name	z-score asthma	z-score dermatitis, atopic	z-score rhinitis
P24394	IL4R	interleukin 4 receptor	exp	3.84	exp
Q9HBE5	IL21R	interleukin 21 receptor	exp	3.46	exp
Q969D9	TSLP	thymic stromal lymphopoietin	exp	exp	3.31
Q9UIL8	PHF11	PHD finger protein 11	exp	2.55	exp
O95715	CXCL14	chemokine (C-X-C motif) ligand 14	exp	12.69	2.91
P13500	CCL2	chemokine (C-C motif) ligand 2	exp	7.83
O00175	CCL24	chemokine (C-C motif) ligand 24	2.95	exp	2.91
Q92583	CCL17	chemokine (C-C motif) ligand 17	2.5	exp	2.44
Q01638	IL1RL1	interleukin 1 receptor-like 1	exp	4.51
Q8NI36	WDR36	WD repeat domain 36	exp		3.37
P16278	GLB1	galactosidase beta 1	2.94	exp
Q9Y5Y4	PTGDR2	prostaglandin D2 receptor 2	exp	2.86
P35367	HRH1	histamine receptor H1		2.75	exp
P30542	ADORA1	adenosine A1 receptor	exp	2.64
O00626	CCL22	chemokine (C-C motif) ligand 22	2.38	exp
O75899	GABBR2	gamma-aminobutyric acid (GABA) B receptor, 2	exp	2.38
Q9P0G3	KLK14	kallikrein related peptidase 14	22.41	3.8	89.01
Q9Y337	KLK5	kallikrein related peptidase 5	15.73	3.84	58.62
P49862	KLK7	kallikrein related peptidase 7	10.71	2.42	39.22
Q9ULW8	PADI3	peptidyl arginine deiminase, type III		29.24	3.8
Q9Y2J8	PADI2	peptidyl arginine deiminase, type II		25.32	6.42
Q99572	P2RX7	purinergic receptor P2X, ligand gated ion channel, 7	4.48	3.34	13.09
Q04941	PLP2	proteolipid protein 2 (colonic epithelium-enriched)	3.23	14.36	3.11
Q8N104	DEFB106B	defensin beta 106B	3.13	13.32	2.93
P20142	PGC	progastricsin (pepsinogen C)	4.6		14.33
P16619	CCL3L3	chemokine (C-C motif) ligand 3-like 3	3	13.02	2.89
Q16663	CCL15	chemokine (C-C motif) ligand 15	2.95	12.69	2.91
P24158	PRTN3	proteinase 3	4.94	4.81	8.21
Q9Y258	CCL26	chemokine (C-C motif) ligand 26	2.85	12.12	2.84
P55774	CCL18	chemokine (C-C motif) ligand 18	2.75	12.06	2.64
O60831	PRAF2	PRA1 domain family member 2	2.81	11.81	2.64
Q68CZ1	RPGRIP1L	RPGRIP1-like	3.18		13.85
P22362	CCL1	chemokine (C-C motif) ligand 1	2.71	11.54	2.68
P10720	PF4V1	platelet factor 4 variant 1	2.79	11.32	2.75
P80075	CCL8	chemokine (C-C motif) ligand 8	2.73	11.36	2.47
P78423	CX3CL1	chemokine (C-X3-C motif) ligand 1	2.62	11.28	2.57
O00421	CCRL2	chemokine (C-C motif) receptor-like 2	3.69	9.98	2.61
Q99616	CCL13	chemokine (C-C motif) ligand 13	2.65	10.95	2.4
P31944	CASP14	caspase 14	2.53	3.01	8.55
O00590	ACKR2	atypical chemokine receptor 2	3.36	10.03
Q8WTQ7	GRK7	G protein-coupled receptor kinase 7	2.72	6.4	3.73
P32298	GRK4	G protein-coupled receptor kinase 4	2.68	6.32	3.66
P43250	GRK6	G protein-coupled receptor kinase 6	2.67	6.28	3.56
Q15835	GRK1	G protein-coupled receptor kinase 1	2.66	6.21	3.62
P35626	ADRBK2	adrenergic, beta, receptor kinase 2	2.65	6.11	3.65
P84074	HPCA	hippocalcin	4.08	7.86
Q9NPB9	ACKR4	atypical chemokine receptor 4	3.04	8.73
Q9NYX4	CALY	calcyon neuron-specific vesicular protein	2.81	4.48	4.29
Q8NDV2	GPR26	G protein-coupled receptor 26	2.75	4.8	4.02
P34947	GRK5	G protein-coupled receptor kinase 5	2.43	5.69	3.42
Q8TCY5	MRAP	melanocortin 2 receptor accessory protein	2.6	3.98	4.93
Q969E3	UCN3	urocortin 3	2.65	3.98	4.86
P49238	CX3CR1	chemokine (C-X3-C motif) receptor 1	2.79	8.28
Q9ULD2	MTUS1	microtubule associated tumor suppressor 1	2.41	5.1	3.54
Q9NYY1	IL20	interleukin 20		4.6	6.34
P08311	CTSG	cathepsin G	3.72		7.1
Q16570	ACKR1	atypical chemokine receptor 1 (Duffy blood group)	2.92	7.71
Q9NPH9	IL26	interleukin 26		4.29	6.02
P32246	CCR1	chemokine (C-C motif) receptor 1	2.44	7.6
P27487	DPP4	dipeptidyl-peptidase 4	2.58	7.43
P51686	CCR9	chemokine (C-C motif) receptor 9	2.39	7.48
P46092	CCR10	chemokine (C-C motif) receptor 10	2.33	7.33
P51679	CCR4	chemokine (C-C motif) receptor 4	2.33	7.33
P51685	CCR8	chemokine (C-C motif) receptor 8	2.33	7.33
P41597	CCR2	chemokine (C-C motif) receptor 2	2.35	7.27
Q8TD46	CD200R1	CD200 receptor 1	2.43	4.65	2.5
Q9P0W0	IFNK	interferon, kappa		4	5.4
P05000	IFNW1	interferon, omega 1		4	5.4
Q96JP5	ZFP91	ZFP91 zinc finger protein		3.89	5.35
O95672	ECEL1	endothelin converting enzyme-like 1	2.35	3.44	3.42
P05187	ALPP	alkaline phosphatase, placental	3.32	5.71
P81534	DEFB103B	defensin beta 103B	2.92	5.94
Q99650	OSMR	oncostatin M receptor		4.88	3.61
Q6UXL0	IL20RB	interleukin 20 receptor subunit beta		4.72	3.62
Q8N6P7	IL22RA1	interleukin 22 receptor subunit alpha 1		4.61	3.47
P14735	IDE	insulin-degrading enzyme	2.36	5.68
P16871	IL7R	interleukin 7 receptor		4.52	3.38
P13725	OSM	oncostatin M		3.59	4.3
Q08334	IL10RB	interleukin 10 receptor subunit beta		4.54	3.28
P42702	LIFR	leukemia inhibitory factor receptor alpha		4.38	3.37
P25098	ADRBK1	adrenergic, beta, receptor kinase 1		4.88	2.82
O14512	SOCS7	suppressor of cytokine signaling 7		3.48	4.19
Q9HC73	CRLF2	cytokine receptor-like factor 2		4.39	3.27
Q969J5	IL22RA2	interleukin 22 receptor subunit alpha 2		4.38	3.04
Q8IU57	IFNLR1	interferon, lambda receptor 1		4.38	3.04
Q9UHF4	IL20RA	interleukin 20 receptor subunit alpha		4.18	3.24
O75159	SOCS5	suppressor of cytokine signaling 5		3.37	4.02
P50151	GNG10	guanine nucleotide binding protein (G protein), gamma 10		4.09	3.3
P61952	GNG11	guanine nucleotide binding protein (G protein), gamma 11		4.09	3.29
P48551	IFNAR2	interferon (alpha, beta and omega) receptor 2		4.25	3.1
O14775	GNB5	guanine nucleotide binding protein (G protein), beta 5		4.06	3.28
O15432	SLC31A2	solute carrier family 31 (copper transporter), member 2		3.27	4
P09919	CSF3	colony stimulating factor 3		3.35	3.87
Q9HAV0	GNB4	guanine nucleotide binding protein (G protein), beta polypeptide 4		3.98	3.21
P16520	GNB3	guanine nucleotide binding protein (G protein), beta polypeptide 3		3.96	3.21
P62879	GNB2	guanine nucleotide binding protein (G protein), beta polypeptide 2		3.96	3.2
Q8WXH5	SOCS4	suppressor of cytokine signaling 4		3.24	3.87
O60262	GNG7	guanine nucleotide binding protein (G protein), gamma 7		3.93	3.18
P63218	GNG5	guanine nucleotide binding protein (G protein), gamma 5		3.93	3.18
Q99062	CSF3R	colony stimulating factor 3 receptor		4.14	2.97
P50150	GNG4	guanine nucleotide binding protein (G protein), gamma 4		3.91	3.16
Q16619	CTF1	cardiotrophin 1		3.22	3.79
Q13261	IL15RA	interleukin 15 receptor subunit alpha		3.99	2.96
Q9UBI6	GNG12	guanine nucleotide binding protein (G protein), gamma 12		3.85	3.1
O75575	CRCP	CGRP receptor component		3.16	3.78
P52333	JAK3	Janus kinase 3		4.03	2.88
P01562	IFNA1	interferon, alpha 1		3.21	3.62
Q9UHD0	IL19	interleukin 19		3.19	3.62
P08887	IL6R	interleukin 6 receptor		3.93	2.86
Q13651	IL10RA	interleukin 10 receptor subunit alpha		3.8	2.97
P40933	IL15	interleukin 15		3.39	3.36
P16471	PRLR	prolactin receptor		3.84	2.86
O14508	SOCS2	suppressor of cytokine signaling 2		3.07	3.61
P26992	CNTFR	ciliary neurotrophic factor receptor		3.73	2.92
P63092	GNAS	GNAS complex locus		3.26	3.35
Q5JWF2	GNAS	GNAS complex locus		3.26	3.35
Q14626	IL11RA	interleukin 11 receptor subunit alpha		3.71	2.85
P05013	IFNA6	interferon, alpha 6		3.13	3.4
P01568	IFNA21	interferon, alpha 21		3.13	3.4
P01569	IFNA5	interferon, alpha 5		3.13	3.4
P84996	GNAS	GNAS complex locus		3.21	3.32
P01571	IFNA17	interferon, alpha 17		3.13	3.4
P01567	IFNA7	interferon, alpha 7		3.13	3.4
P01566	IFNA10	interferon, alpha 10		3.13	3.4
P32881	IFNA8	interferon, alpha 8		3.13	3.4
P78552	IL13RA1	interleukin 13 receptor subunit alpha 1		3.63	2.83
P59768	GNG2	guanine nucleotide binding protein (G protein), gamma 2		3.56	2.87
P09543	CNP	2',3'-cyclic nucleotide 3' phosphodiesterase		3.36	3.05
P62873	GNB1	guanine nucleotide binding protein (G protein), beta polypeptide 1		3.54	2.85
Q96N16	JAKMIP1	janus kinase and microtubule interacting protein 1		3.08	3.31
P38405	GNAL	guanine nucleotide binding protein (G protein), alpha activating activity polypeptide, olfactory type		3.41	2.97
P07911	UMOD	uromodulin	2.64	3.72
Q9GZX6	IL22	interleukin 22		3.01	3.34
P17181	IFNAR1	interferon (alpha, beta and omega) receptor 1		3.67	2.68
P38484	IFNGR2	interferon gamma receptor 2 (interferon gamma transducer 1)		3.69	2.65
P01563	IFNA2	interferon, alpha 2		3.05	3.26
P01570	IFNA14	interferon, alpha 14		3.06	3.21
P26951	IL3RA	interleukin 3 receptor subunit alpha		3.53	2.73
P05014	IFNA4	interferon, alpha 4		2.97	3.21
Q9HBE4	IL21	interleukin 21		3.11	3.03
P53675	CLTCL1	clathrin, heavy chain-like 1		3.22	2.9
P13232	IL7	interleukin 7		2.98	3.11
P14902	IDO1	indoleamine 2,3-dioxygenase 1		3.21	2.82
Q14627	IL13RA2	interleukin 13 receptor subunit alpha 2		3.39	2.62
P10912	GHR	growth hormone receptor		3.41	2.59
P15260	IFNGR1	interferon gamma receptor 1		3.5	2.47
P48544	KCNJ5	potassium channel, inwardly rectifying subfamily J, member 5		3.36	2.59
P08754	GNAI3	guanine nucleotide binding protein (G protein), alpha inhibiting activity polypeptide 3		3.55	2.37
P48549	KCNJ3	potassium channel, inwardly rectifying subfamily J, member 3		3.32	2.57
P57730	CARD18	caspase recruitment domain family member 18	2.41	3.45
P48051	KCNJ6	potassium channel, inwardly rectifying subfamily J, member 6		3.3	2.56
P40189	IL6ST	interleukin 6 signal transducer		3.18	2.67
P04899	GNAI2	guanine nucleotide binding protein (G protein), alpha inhibiting activity polypeptide 2		3.48	2.36
Q5NUL3	FFAR4	free fatty acid receptor 4		2.92	2.87
P30679	GNA15	guanine nucleotide binding protein (G protein), alpha 15 (Gq class)		3.19	2.57
P63096	GNAI1	guanine nucleotide binding protein (G protein), alpha inhibiting activity polypeptide 1		3.42	2.33
P19235	EPOR	erythropoietin receptor		3.33	2.42
Q86W26	NLRP10	NLR family, pyrin domain containing 10	2.85	2.88
P50148	GNAQ	guanine nucleotide binding protein (G protein), q polypeptide		3.06	2.61
P35453	HOXD13	homeobox D13	2.92		2.75
P48147	PREP	prolyl endopeptidase		2.47	3.2
P29992	GNA11	guanine nucleotide binding protein (G protein), alpha 11 (Gq class)		3.07	2.55
P35030	PRSS3	protease, serine 3	2.67		2.94
P01236	PRL	prolactin		2.62	2.98
P40238	MPL	MPL proto-oncogene, thrombopoietin receptor		3.16	2.33
Q9UIG8	SLCO3A1	solute carrier organic anion transporter family member 3A1		2.32	3.14
P37058	HSD17B3	hydroxysteroid (17-beta) dehydrogenase 3		2.38	3.03
P01241	GH1	growth hormone 1		2.62	2.75
O43699	SIGLEC6	sialic acid binding Ig-like lectin 6		2.46	2.89
Q9BXJ1	C1QTNF1	C1q and tumor necrosis factor related protein 1		2.46	2.74
P01242	GH2	growth hormone 2		2.54	2.61
Q9NSE2	CISH	cytokine inducible SH2-containing protein		2.66	2.45
P23458	JAK1	Janus kinase 1		2.66	2.39
Q9NRF2	SH2B1	SH2B adaptor protein 1		2.43	2.48
Q07075	ENPEP	glutamyl aminopeptidase (aminopeptidase A)		2.43	2.45
P15086	CPB1	carboxypeptidase B1		2.43	2.45
P15088	CPA3	carboxypeptidase A3		2.43	2.45
Q9BYF1	ACE2	angiotensin I converting enzyme 2		2.43	2.45
P29597	TYK2	tyrosine kinase 2		2.45	2.39
P01574	IFNB1	interferon, beta 1, fibroblast		2.39	2.33
Q9Y2I2	NTNG1	netrin G1	212.67
P51161	FABP6	fatty acid binding protein 6, ileal			92.36
Q3KNW5	SLC10A6	solute carrier family 10 (sodium/bile acid cotransporter), member 6			81.22
O15438	ABCC3	ATP binding cassette subfamily C member 3			64.58
Q04118	PRB3	proline-rich protein BstNI subfamily 3			47.94
Q12908	SLC10A2	solute carrier family 10 (sodium/bile acid cotransporter), member 2			40.82
Q9Y6L6	SLCO1B1	solute carrier organic anion transporter family member 1B1			26.29
Q9NPD5	SLCO1B3	solute carrier organic anion transporter family member 1B3			26.29
P20933	AGA	aspartylglucosaminidase			24.45
Q86T82	USP37	ubiquitin specific peptidase 37			23.82
Q7Z5G4	GOLGA7	golgin A7			20.39
P02790	HPX	hemopexin			19.85
P58062	SPINK7	serine peptidase inhibitor, Kazal type 7 (putative)	19.35
Q5T2W1	PDZK1	PDZ domain containing 1			18.04
P10632	CYP2C8	cytochrome P450 family 2 subfamily C member 8	16.85
P33260	CYP2C18	cytochrome P450 family 2 subfamily C member 18	16.85
P55899	FCGRT	Fc fragment of IgG, receptor, transporter, alpha			16.76
P33261	CYP2C19	cytochrome P450 family 2 subfamily C member 19	16.57
P11712	CYP2C9	cytochrome P450 family 2 subfamily C member 9	16.57
P05177	CYP1A2	cytochrome P450 family 1 subfamily A member 2	15.58
P05181	CYP2E1	cytochrome P450 family 2 subfamily E member 1	15.06
P08684	CYP3A4	cytochrome P450 family 3 subfamily A member 4	13.64
Q16678	CYP1B1	cytochrome P450 family 1 subfamily B member 1	13.32
P04798	CYP1A1	cytochrome P450 family 1 subfamily A member 1	12.86
P07099	EPHX1	epoxide hydrolase 1, microsomal (xenobiotic)	12.07
P81605	DCD	dermcidin			11.46
P30047	GCHFR	GTP cyclohydrolase I feedback regulator			10.92
Q86UT5	PDZD3	PDZ domain containing 3			10.54
Q16627	CCL14	chemokine (C-C motif) ligand 14		10.37
Q9NSA0	SLC22A11	solute carrier family 22 (organic anion/urate transporter), member 11			9.9
Q9H015	SLC22A4	solute carrier family 22 (organic cation/zwitterion transporter), member 4			9.9
O76082	SLC22A5	solute carrier family 22 (organic cation/carnitine transporter), member 5			9.9
Q8N130	SLC34A3	solute carrier family 34 (type II sodium/phosphate cotransporter), member 3			9.9
Q13113	PDZK1IP1	PDZK1 interacting protein 1			9.9
Q9UEU0	VTI1B	vesicle transport through interaction with t-SNAREs 1B			9.71
Q9P0N8	MARCH2	membrane associated ring-CH-type finger 2			9.65
Q7LBE3	SLC26A9	solute carrier family 26 (anion exchanger), member 9			9.57
Q7Z2H8	SLC36A1	solute carrier family 36 (proton/amino acid symporter), member 1			9.57
P80098	CCL7	chemokine (C-C motif) ligand 7		9.1
Q8N6G6	ADAMTSL1	ADAMTS like 1	8.99
P10147	CCL3	chemokine (C-C motif) ligand 3		8.31
Q9ULQ1	TPCN1	two pore segment channel 1	8.23
O15444	CCL25	chemokine (C-C motif) ligand 25		8.05
Q96AJ9	VTI1A	vesicle transport through interaction with t-SNAREs 1A			7.99
Q99731	CCL19	chemokine (C-C motif) ligand 19		7.98
P80162	CXCL6	chemokine (C-X-C motif) ligand 6		7.77
P47992	XCL1	chemokine (C motif) ligand 1		7.7
Q9UBD3	XCL2	chemokine (C motif) ligand 2		7.7
Q8TE69	CXorf40A	chromosome X open reading frame 40A	7.69
P19876	CXCL3	chemokine (C-X-C motif) ligand 3		7.6
O15467	CCL16	chemokine (C-C motif) ligand 16		7.54
Q9NRJ3	CCL28	chemokine (C-C motif) ligand 28		7.53
O00585	CCL21	chemokine (C-C motif) ligand 21		7.41
Q04900	CD164	CD164 molecule, sialomucin		7.41
Q9Y4X3	CCL27	chemokine (C-C motif) ligand 27		7.36
P02775	PPBP	pro-platelet basic protein		7.31
P55773	CCL23	chemokine (C-C motif) ligand 23		7.27
P46094	XCR1	chemokine (C motif) receptor 1		7.25
Q07325	CXCL9	chemokine (C-X-C motif) ligand 9		7.23
P08709	F7	coagulation factor VII (serum prothrombin conversion accelerator)			7.22
Q7Z7M8	B3GNT8	UDP-GlcNAc:betaGal beta-1,3-N-acetylglucosaminyltransferase 8	7.1
Q9UJ37	ST6GALNAC2	ST6 (alpha-N-acetyl-neuraminyl-2,3-beta-galactosyl-1,3)-N-acetylgalactosaminide alpha-2,6-sialyltransferase 2	7.1
Q9BYG0	B3GNT5	UDP-GlcNAc:betaGal beta-1,3-N-acetylglucosaminyltransferase 5	7.1
Q02742	GCNT1	glucosaminyl (N-acetyl) transferase 1, core 2	7.1
Q6ZMB0	B3GNT6	UDP-GlcNAc:betaGal beta-1,3-N-acetylglucosaminyltransferase 6	7.1
P50502	ST13	suppression of tumorigenicity 13 (colon carcinoma) (Hsp70 interacting protein)			7.01
O60499	STX10	syntaxin 10			7
P19875	CXCL2	chemokine (C-X-C motif) ligand 2		6.96
Q2Y0W8	SLC4A8	solute carrier family 4, sodium bicarbonate cotransporter, member 8			6.94
Q99983	OMD	osteomodulin	6.9
O60938	KERA	keratocan	6.9
P32302	CXCR5	chemokine (C-X-C motif) receptor 5		6.89
P51790	CLCN3	chloride channel, voltage-sensitive 3			6.87
P02776	PF4	platelet factor 4		6.82
Q8IXK2	GALNT12	polypeptide N-acetylgalactosaminyltransferase 12	6.81
Q86SF2	GALNT7	polypeptide N-acetylgalactosaminyltransferase 7	6.81
Q8NCW6	GALNT11	polypeptide N-acetylgalactosaminyltransferase 11	6.81
Q10472	GALNT1	polypeptide N-acetylgalactosaminyltransferase 1	6.81
Q96FL9	GALNT14	polypeptide N-acetylgalactosaminyltransferase 14	6.81
Q10471	GALNT2	polypeptide N-acetylgalactosaminyltransferase 2	6.81
Q9NS00	C1GALT1	core 1 synthase, glycoprotein-N-acetylgalactosamine 3-beta-galactosyltransferase 1	6.81
Q8N4A0	GALNT4	polypeptide N-acetylgalactosaminyltransferase 4	6.81
Q86SR1	GALNT10	polypeptide N-acetylgalactosaminyltransferase 10	6.81
Q9BZ71	PITPNM3	PITPNM family member 3		6.78
P13236	CCL4	chemokine (C-C motif) ligand 4		6.71
P15907	ST6GAL1	ST6 beta-galactosamide alpha-2,6-sialyltranferase 1	6.66
P42830	CXCL5	chemokine (C-X-C motif) ligand 5		6.65
Q03591	CFHR1	complement factor H-related 1			6.6
O14625	CXCL11	chemokine (C-X-C motif) ligand 11		6.53
Q7Z7M9	GALNT5	polypeptide N-acetylgalactosaminyltransferase 5	6.44
Q8N428	GALNT16	polypeptide N-acetylgalactosaminyltransferase 16	6.44
Q14435	GALNT3	polypeptide N-acetylgalactosaminyltransferase 3	6.43
O60488	ACSL4	acyl-CoA synthetase long-chain family member 4		6.3
Q5FVE4	ACSBG2	acyl-CoA synthetase bubblegum family member 2		6.3
Q9ULC5	ACSL5	acyl-CoA synthetase long-chain family member 5		6.3
P33121	ACSL1	acyl-CoA synthetase long-chain family member 1		6.3
P14091	CTSE	cathepsin E	6.26
P53634	CTSC	cathepsin C	6.26
Q9UBX1	CTSF	cathepsin F	6.26
P21754	ZP3	zona pellucida glycoprotein 3 (sperm receptor)	6.16
Q06828	FMOD	fibromodulin	6.11
P09341	CXCL1	chemokine (C-X-C motif) ligand 1 (melanoma growth stimulating activity, alpha)		6.09
P20774	OGN	osteoglycin	6.06
P54868	HMGCS2	3-hydroxy-3-methylglutaryl-CoA synthase 2 (mitochondrial)		6
P23786	CPT2	carnitine palmitoyltransferase 2		6
P48163	ME1	malic enzyme 1, NADP(+)-dependent, cytosolic		6
P78556	CCL20	chemokine (C-C motif) ligand 20		6
Q99538	LGMN	legumain	5.99
Q9BR39	JPH2	junctophilin 2	5.94
O75923	DYSF	dysferlin	5.94
O00287	RFXAP	regulatory factor X associated protein	5.88
P25024	CXCR1	chemokine (C-X-C motif) receptor 1		5.87
P25025	CXCR2	chemokine (C-X-C motif) receptor 2		5.78
Q9Y5L3	ENTPD2	ectonucleoside triphosphate diphosphohydrolase 2			5.77
Q0VD83	APOBR	apolipoprotein B receptor		5.76
Q9BV79	MECR	mitochondrial trans-2-enoyl-CoA reductase		5.76
P43235	CTSK	cathepsin K	5.73
P10619	CTSA	cathepsin A	5.73
O15254	ACOX3	acyl-CoA oxidase 3, pristanoyl		5.7
Q99424	ACOX2	acyl-CoA oxidase 2, branched chain		5.7
Q9ULV0	MYO5B	myosin VB			5.63
P07108	DBI	diazepam binding inhibitor (GABA receptor modulator, acyl-CoA binding protein)		5.58
P09110	ACAA1	acetyl-CoA acyltransferase 1		5.58
Q86SK9	SCD5	stearoyl-CoA desaturase 5		5.58
Q6P1M0	SLC27A4	solute carrier family 27 (fatty acid transporter), member 4		5.58
O14520	AQP7	aquaporin 7		5.54
P07288	KLK3	kallikrein related peptidase 3			5.43
O60911	CTSV	cathepsin V	5.42
Q9UBX8	B4GALT6	UDP-Gal:betaGlcNAc beta 1,4- galactosyltransferase, polypeptide 6	5.37
Q9NY97	B3GNT2	UDP-GlcNAc:betaGal beta-1,3-N-acetylglucosaminyltransferase 2	5.37
Q9Y2A9	B3GNT3	UDP-GlcNAc:betaGal beta-1,3-N-acetylglucosaminyltransferase 3	5.37
P50222	MEOX2	mesenchyme homeobox 2			5.34
P52732	KIF11	kinesin family member 11	5.31
Q9UNK0	STX8	syntaxin 8			5.31
O15066	KIF3B	kinesin family member 3B	5.3
O14662	STX16	syntaxin 16			5.28
Q8N608	DPP10	dipeptidyl-peptidase 10 (inactive)		5.28
Q9BXF6	RAB11FIP5	RAB11 family interacting protein 5 (class I)			5.26
P51888	PRELP	proline/arginine-rich end leucine-rich repeat protein	5.25
Q9Y5B8	NME7	NME/NM23 family member 7	5.21
P13765	HLA-DOB	major histocompatibility complex, class II, DO beta	5.18
P07711	CTSL	cathepsin L	5.17
O14782	KIF3C	kinesin family member 3C	5.17
Q14807	KIF22	kinesin family member 22	5.17
O14791	APOL1	apolipoprotein L1			5.16
Q13206	DDX10	DEAD (Asp-Glu-Ala-Asp) box polypeptide 10			5.16
Q5T6F2	UBAP2	ubiquitin associated protein 2			5.16
Q9NS87	KIF15	kinesin family member 15	5.15
Q6P597	KLC3	kinesin light chain 3	5.07
Q8IWE5	PLEKHM2	pleckstrin homology and RUN domain containing M2	5.01
P25774	CTSS	cathepsin S	5.01
P09668	CTSH	cathepsin H	4.99
O95864	FADS2	fatty acid desaturase 2		4.99
P51884	LUM	lumican	4.98
Q9BTE1	DCTN5	dynactin subunit 5	4.92
Q9BXW6	OSBPL1A	oxysterol binding protein like 1A	4.92
Q8TCX1	DYNC2LI1	dynein, cytoplasmic 2, light intermediate chain 1	4.91
Q9UJW0	DCTN4	dynactin subunit 4	4.89
Q9NSK0	KLC4	kinesin light chain 4	4.87
P42658	DPP6	dipeptidyl-peptidase 6		4.87
Q96NA2	RILP	Rab interacting lysosomal protein	4.87
Q9BXI6	TBC1D10A	TBC1 domain family member 10A			4.83
Q9Y6M7	SLC4A7	solute carrier family 4, sodium bicarbonate cotransporter, member 7			4.82
Q96S37	SLC22A12	solute carrier family 22 (organic anion/urate transporter), member 12			4.81
Q92845	KIFAP3	kinesin-associated protein 3	4.76
O15498	YKT6	YKT6 v-SNARE homolog (S. cerevisiae)			4.76
Q08378	GOLGA3	golgin A3			4.76
P11310	ACADM	acyl-CoA dehydrogenase, C-4 to C-12 straight chain		4.74
Q02928	CYP4A11	cytochrome P450 family 4 subfamily A member 11		4.72
P38571	LIPA	lipase A, lysosomal acid, cholesterol esterase		4.72
O43291	SPINT2	serine peptidase inhibitor, Kunitz type, 2			4.71
O95573	ACSL3	acyl-CoA synthetase long-chain family member 3		4.69
O14529	CUX2	cut-like homeobox 2			4.68
P28068	HLA-DMB	major histocompatibility complex, class II, DM beta	4.68
Q12840	KIF5A	kinesin family member 5A	4.67
P32189	GK	glycerol kinase		4.67
O00399	DCTN6	dynactin subunit 6	4.66
P28067	HLA-DMA	major histocompatibility complex, class II, DM alpha	4.66
Q09019	DMWD	dystrophia myotonica, WD repeat containing			4.66
Q9H0B6	KLC2	kinesin light chain 2	4.64
Q9BQ51	PDCD1LG2	programmed cell death 1 ligand 2	4.64
Q15116	PDCD1	programmed cell death 1	4.62
O43752	STX6	syntaxin 6			4.62
Q8TCG5	CPT1C	carnitine palmitoyltransferase 1C		4.61
O15263	DEFB4A	defensin beta 4A		4.61
O00194	RAB27B	RAB27B, member RAS oncogene family			4.61
P51159	RAB27A	RAB27A, member RAS oncogene family			4.6
P78380	OLR1	oxidized low density lipoprotein (lectin-like) receptor 1		4.59
O95239	KIF4A	kinesin family member 4A	4.56
Q07866	KLC1	kinesin light chain 1	4.56
Q9NZQ7	CD274	CD274 molecule	4.56
P40879	SLC26A3	solute carrier family 26 (anion exchanger), member 3			4.56
Q14847	LASP1	LIM and SH3 protein 1		4.55
P06340	HLA-DOA	major histocompatibility complex, class II, DO alpha	4.53
Q9NRW7	VPS45	vacuolar protein sorting 45 homolog (S. cerevisiae)			4.51
O60282	KIF5C	kinesin family member 5C	4.49
O75379	VAMP4	vesicle associated membrane protein 4			4.49
Q11203	ST3GAL3	ST3 beta-galactoside alpha-2,3-sialyltransferase 3	4.48
Q9NZ32	ACTR10	actin-related protein 10 homolog (S. cerevisiae)	4.41
Q9UK17	KCND3	potassium channel, voltage gated Shal related subfamily D, member 3		4.4
O95235	KIF20A	kinesin family member 20A	4.4
P22307	SCP2	sterol carrier protein 2		4.39
P07339	CTSD	cathepsin D	4.38
P22680	CYP7A1	cytochrome P450 family 7 subfamily A member 1		4.26
O95486	SEC24A	SEC24 homolog A, COPII coat complex component	4.25
P48061	CXCL12	chemokine (C-X-C motif) ligand 12		4.21
Q9HD26	GOPC	golgi-associated PDZ and coiled-coil motif containing			4.21
O95487	SEC24B	SEC24 homolog B, COPII coat complex component	4.21
O14593	RFXANK	regulatory factor X associated ankyrin containing protein	4.2
O94855	SEC24D	SEC24 homolog D, COPII coat complex component	4.2
P49888	SULT1E1	sulfotransferase family 1E member 1	4.18
P42025	ACTR1B	ARP1 actin-related protein 1 homolog B, centractin beta (yeast)	4.18
O75896	TUSC2	tumor suppressor candidate 2			4.17
Q15436	SEC23A	Sec23 homolog A, COPII coat complex component	4.14
P53992	SEC24C	SEC24 homolog C, COPII coat complex component	4.13
P07858	CTSB	cathepsin B	4.12
Q96T53	MBOAT4	membrane bound O-acyltransferase domain containing 4			4.11
O94979	SEC31A	SEC31 homolog A, COPII coat complex component	4.11
P16112			4.11
Q8NCM8	DYNC2H1	dynein, cytoplasmic 2, heavy chain 1	4.09
P61073	CXCR4	chemokine (C-X-C motif) receptor 4		4.09
Q14694	USP10	ubiquitin specific peptidase 10			4.07
Q9Y6B6	SAR1B	secretion associated, Ras related GTPase 1B	4.05
P02760	AMBP	alpha-1-microglobulin/bikunin precursor			4.05
P01733			4.01
O43237	DYNC1LI2	dynein, cytoplasmic 1, light intermediate chain 2	4
O95433	AHSA1	AHA1, activator of heat shock 90kDa protein ATPase homolog 1 (yeast)			3.99
Q9BY76	ANGPTL4	angiopoietin like 4		3.98
P01850			3.96
P55058	PLTP	phospholipid transfer protein		3.95
P35243	RCVRN	recoverin		3.95
Q99969	RARRES2	retinoic acid receptor responder (tazarotene induced) 2	3.95
Q02241	KIF23	kinesin family member 23	3.94
Q96FJ2	DYNLL2	dynein, light chain, LC8-type 2	3.93
P01848			3.92
O14576	DYNC1I1	dynein, cytoplasmic 1, intermediate chain 1	3.91
P48382	RFX5	regulatory factor X5	3.89
O00767	SCD	stearoyl-CoA desaturase (delta-9-desaturase)		3.88
P07204	THBD	thrombomodulin		3.84
Q15067	ACOX1	acyl-CoA oxidase 1, palmitoyl		3.78
Q9UQ16	DNM3	dynamin 3	3.77
P43627	KIR2DL2	killer cell immunoglobulin-like receptor, two domains, long cytoplasmic tail, 2	3.71
P43632	KIR2DS4	killer cell immunoglobulin-like receptor, two domains, short cytoplasmic tail, 4	3.71
P51149	RAB7A	RAB7A, member RAS oncogene family	3.7
Q9NWQ8	PAG1	phosphoprotein membrane anchor with glycosphingolipid microdomains 1	3.69
P50416	CPT1A	carnitine palmitoyltransferase 1A (liver)		3.69
P79483	HLA-DRB3	major histocompatibility complex, class II, DR beta 3	3.67
Q30154	HLA-DRB5	major histocompatibility complex, class II, DR beta 5	3.67
P05538	HLA-DQB2	major histocompatibility complex, class II, DQ beta 2	3.67
P13762	HLA-DRB4	major histocompatibility complex, class II, DR beta 4	3.67
Q6ZQW0	IDO2	indoleamine 2,3-dioxygenase 2		3.67
P43631	KIR2DS2	killer cell immunoglobulin-like receptor, two domains, short cytoplasmic tail, 2	3.66
P26715	KLRC1	killer cell lectin-like receptor subfamily C, member 1	3.66
Q13162	PRDX4	peroxiredoxin 4			3.65
P43629	KIR3DL1	killer cell immunoglobulin-like receptor, three domains, long cytoplasmic tail, 1	3.63
P20036	HLA-DPA1	major histocompatibility complex, class II, DP alpha 1	3.62
P43628	KIR2DL3	killer cell immunoglobulin-like receptor, two domains, long cytoplasmic tail, 3	3.62
P43626	KIR2DL1	killer cell immunoglobulin-like receptor, two domains, long cytoplasmic tail, 1	3.62
Q13445	TMED1	transmembrane p24 trafficking protein 1	3.6
Q15907	RAB11B	RAB11B, member RAS oncogene family			3.57
Q96PC3	AP1S3	adaptor related protein complex 1 sigma 3 subunit	3.57
P01906	HLA-DQA2	major histocompatibility complex, class II, DQ alpha 2	3.56
Q96S52	PIGS	phosphatidylinositol glycan anchor biosynthesis class S		3.56
Q969N2	PIGT	phosphatidylinositol glycan anchor biosynthesis class T		3.56
P27824	CANX	calnexin	3.56
P56377	AP1S2	adaptor related protein complex 1 sigma 2 subunit	3.55
P09958	FURIN	furin (paired basic amino acid cleaving enzyme)			3.52
O75023	LILRB5	leukocyte immunoglobulin-like receptor, subfamily B (with TM and ITIM domains), member 5	3.49
P16050	ALOX15	arachidonate 15-lipoxygenase		3.49
Q03519	TAP2	transporter 2, ATP-binding cassette, sub-family B (MDR/TAP)	3.48
P33176	KIF5B	kinesin family member 5B	3.46
Q8N423	LILRB2	leukocyte immunoglobulin-like receptor, subfamily B (with TM and ITIM domains), member 2	3.46
P04233	CD74	CD74 molecule, major histocompatibility complex, class II invariant chain	3.44
Q8NHJ6	LILRB4	leukocyte immunoglobulin-like receptor, subfamily B (with TM and ITIM domains), member 4	3.44
Q4VC05	BCL7A	B-cell CLL/lymphoma 7A		3.42
Q9Y6Q5	AP1M2	adaptor related protein complex 1 mu 2 subunit	3.42
P26022	PTX3	pentraxin 3			3.41
P06744	GPI	glucose-6-phosphate isomerase		3.4
P61966	AP1S1	adaptor related protein complex 1 sigma 1 subunit	3.39
P27352	GIF	gastric intrinsic factor	3.39
P38435	GGCX	gamma-glutamyl carboxylase			3.39
Q9Y215	COLQ	collagen-like tail subunit (single strand of homotrimer) of asymmetric acetylcholinesterase			3.37
Q99706	KIR2DL4	killer cell immunoglobulin-like receptor, two domains, long cytoplasmic tail, 4	3.37
Q10567	AP1B1	adaptor related protein complex 1 beta 1 subunit	3.35
Q9NQV6	PRDM10	PR domain containing 10	3.35
O15400	STX7	syntaxin 7			3.35
P06276	BCHE	butyrylcholinesterase			3.35
Q86YS3	RAB11FIP4	RAB11 family interacting protein 4 (class II)			3.32
O00592	PODXL	podocalyxin-like			3.29
O43747	AP1G1	adaptor related protein complex 1 gamma 1 subunit	3.29
P57735	RAB25	RAB25, member RAS oncogene family			3.29
O15020	SPTBN2	spectrin, beta, non-erythrocytic 2	3.29
Q5VWK5	IL23R	interleukin 23 receptor		3.27
P08575	PTPRC	protein tyrosine phosphatase, receptor type, C	3.27
Q9UJU6	DBNL	drebrin-like	3.27
P01903	HLA-DRA	major histocompatibility complex, class II, DR alpha	3.26
Q9H6Q3	SLA2	Src-like-adaptor 2	3.25
P04234	CD3D	CD3d molecule, delta (CD3-TCR complex)	3.25
Q9BXS5	AP1M1	adaptor related protein complex 1 mu 1 subunit	3.24
Q92887	ABCC2	ATP binding cassette subfamily C member 2			3.23
P30101	PDIA3	protein disulfide isomerase family A member 3	3.23
Q9ULC0	EMCN	endomucin			3.21
Q03518	TAP1	transporter 1, ATP-binding cassette, sub-family B (MDR/TAP)	3.21
Q9NZ53	PODXL2	podocalyxin-like 2			3.21
P22303	ACHE	acetylcholinesterase (Yt blood group)			3.2
Q8NHL6	LILRB1	leukocyte immunoglobulin-like receptor, subfamily B (with TM and ITIM domains), member 1	3.19
P17787	CHRNB2	cholinergic receptor, nicotinic beta 2		3.19
P00709	LALBA	lactalbumin, alpha-	3.18
P10145	CXCL8	chemokine (C-X-C motif) ligand 8		3.18
O15117	FYB	FYN binding protein	3.18
Q96NW4	ANKRD27	ankyrin repeat domain 27	3.17
Q7L804	RAB11FIP2	RAB11 family interacting protein 2 (class I)			3.16
Q96RN1	SLC26A8	solute carrier family 26 (anion exchanger), member 8	3.15
P07766	CD3E	CD3e molecule, epsilon (CD3-TCR complex)	3.15
P43378	PTPN9	protein tyrosine phosphatase, non-receptor type 9			3.14
P78314	SH3BP2	SH3-domain binding protein 2	3.14
Q9NYM9	BET1L	Bet1 golgi vesicular membrane trafficking protein like			3.12
Q96EU7	C1GALT1C1	C1GALT1 specific chaperone 1	3.11
Q9GIY3	HLA-DRB1	major histocompatibility complex, class II, DR beta 1	3.1
Q95IE3	HLA-DRB1	major histocompatibility complex, class II, DR beta 1	3.1
Q9TQE0	HLA-DRB1	major histocompatibility complex, class II, DR beta 1	3.1
Q5Y7A7	HLA-DRB1	major histocompatibility complex, class II, DR beta 1	3.1
P20039	HLA-DRB1	major histocompatibility complex, class II, DR beta 1	3.1
P04229	HLA-DRB1	major histocompatibility complex, class II, DR beta 1	3.1
P13760	HLA-DRB1	major histocompatibility complex, class II, DR beta 1	3.1
Q30134	HLA-DRB1	major histocompatibility complex, class II, DR beta 1	3.1
Q56P42	PYDC2	pyrin domain containing 2		3.1
P13761	HLA-DRB1	major histocompatibility complex, class II, DR beta 1	3.1
Q30167	HLA-DRB1	major histocompatibility complex, class II, DR beta 1	3.1
Q8WXG8	S100Z	S100 calcium binding protein Z			3.1
Q9UGI9	PRKAG3	protein kinase, AMP-activated, gamma 3 non-catalytic subunit			3.09
P61278	SST	somatostatin		3.08
P40925	MDH1	malate dehydrogenase 1			3.08
P26717	KLRC2	killer cell lectin-like receptor subfamily C, member 2	3.06
P50052	AGTR2	angiotensin II receptor, type 2		3.06
P22466	GAL	galanin/GMAP prepropeptide		3.06
P48146	NPBWR2	neuropeptides B/W receptor 2		3.05
P48145	NPBWR1	neuropeptides B/W receptor 1		3.05
Q8NG41	NPB	neuropeptide B		3.05
P25106	ACKR3	atypical chemokine receptor 3		3.05
Q8N729	NPW	neuropeptide W		3.05
Q13952	NFYC	nuclear transcription factor Y subunit gamma	3.04
Q9H0H5	RACGAP1	Rac GTPase activating protein 1	3.04
P01298	PPY	pancreatic polypeptide		3.03
Q8TDU9	RXFP4	relaxin/insulin-like family peptide receptor 4		3.03
Q9H490	PIGU	phosphatidylinositol glycan anchor biosynthesis class U		3.03
P10082	PYY	peptide YY		3.03
O43292	GPAA1	glycosylphosphatidylinositol anchor attachment 1		3.03
Q9UGJ0	PRKAG2	protein kinase, AMP-activated, gamma 2 non-catalytic subunit			3.02
O95998	IL18BP	interleukin 18 binding protein		3.02
O60494	CUBN	cubilin	3.02
Q14019	COTL1	coactosin-like F-actin binding protein 1	3.01
P49146	NPY2R	neuropeptide Y receptor Y2		3.01
P25929	NPY1R	neuropeptide Y receptor Y1		3.01
Q9BYJ9	YTHDF1	YTH N(6)-methyladenosine RNA binding protein 1			2.99
P04632	CAPNS1	calpain, small subunit 1		2.99
O15533	TAPBP	TAP binding protein (tapasin)	2.99
Q9BRJ2	MRPL45	mitochondrial ribosomal protein L45			2.99
Q13519	PNOC	prepronociceptin		2.99
Q8IXW5	RPAP2	RNA polymerase II associated protein 2			2.99
Q13241	KLRD1	killer cell lectin-like receptor subfamily D, member 1	2.99
Q8IX18	DHX40	DEAH (Asp-Glu-Ala-His) box polypeptide 40			2.99
Q8N9T8	KRI1	KRI1 homolog			2.99
O43603	GALR2	galanin receptor 2		2.96
Q9Y5Q6	INSL5	insulin like 5		2.96
Q14116	IL18	interleukin 18		2.96
P47211	GALR1	galanin receptor 1		2.96
P98187	CYP4F8	cytochrome P450 family 4 subfamily F member 8	2.94
Q15836	VAMP3	vesicle associated membrane protein 3			2.94
O43312	MTSS1	metastasis suppressor 1	2.94
P48740	MASP1	mannan-binding lectin serine peptidase 1 (C4/C2 activating component of Ra-reactive factor)			2.94
Q9NSD7	RXFP3	relaxin/insulin-like family peptide receptor 3		2.93
Q9Y3B7	MRPL11	mitochondrial ribosomal protein L11		2.92
Q6P1A2	LPCAT3	lysophosphatidylcholine acyltransferase 3		2.92
P20382	PMCH	pro-melanin concentrating hormone		2.92
O43314	PPIP5K2	diphosphoinositol pentakisphosphate kinase 2		2.92
P51810	GPR143	G protein-coupled receptor 143			2.92
Q9Y4H4	GPSM3	G-protein signaling modulator 3		2.92
Q13478	IL18R1	interleukin 18 receptor 1		2.92
P54619	PRKAG1	protein kinase, AMP-activated, gamma 1 non-catalytic subunit			2.91
Q96F24	NRBF2	nuclear receptor binding factor 2		2.91
P01732	CD8A	CD8a molecule	2.91
Q8WX94	NLRP7	NLR family, pyrin domain containing 7		2.91
Q8WXF3	RLN3	relaxin 3		2.9
P28221	HTR1D	5-hydroxytryptamine (serotonin) receptor 1D, G protein-coupled		2.9
Q9HC23	PROK2	prokineticin 2		2.89
Q8TCW9	PROKR1	prokineticin receptor 1		2.89
Q8NFJ6	PROKR2	prokineticin receptor 2		2.89
P58294	PROK1	prokineticin 1		2.89
P11279	LAMP1	lysosomal-associated membrane protein 1	2.89
Q02318	CYP27A1	cytochrome P450 family 27 subfamily A member 1		2.89
P28336	NMBR	neuromedin B receptor		2.88
P05204	HMGN2	high mobility group nucleosomal binding domain 2		2.88
O75364	PITX3	paired-like homeodomain 3			2.87
Q13007	IL24	interleukin 24			2.87
P53680	AP2S1	adaptor related protein complex 2 sigma 1 subunit	2.87
P36544	CHRNA7	cholinergic receptor, nicotinic alpha 7		2.87
P34972	CNR2	cannabinoid receptor 2		2.86
P35414	APLNR	apelin receptor		2.86
Q9BXA5	SUCNR1	succinate receptor 1		2.86
Q9NYW7	TAS2R1	taste 2 receptor member 1		2.86
Q9NRV9	HEBP1	heme binding protein 1		2.86
Q9H244	P2RY12	purinergic receptor P2Y, G-protein coupled, 12		2.86
Q9NYW1	TAS2R9	taste 2 receptor member 9		2.86
P51582	P2RY4	pyrimidinergic receptor P2Y, G-protein coupled, 4		2.86
Q9NYW4	TAS2R5	taste 2 receptor member 5		2.86
Q8TDS4	HCAR2	hydroxycarboxylic acid receptor 2		2.86
O95833	CLIC3	chloride intracellular channel 3		2.86
P22891	PROZ	protein Z, vitamin K-dependent plasma glycoprotein			2.86
P49019	HCAR3	hydroxycarboxylic acid receptor 3		2.86
Q9NYV8	TAS2R14	taste 2 receptor member 14		2.86
Q9NYW0	TAS2R10	taste 2 receptor member 10		2.86
Q9NYW2	TAS2R8	taste 2 receptor member 8		2.86
Q9NYV9	TAS2R13	taste 2 receptor member 13		2.86
Q9NYW5	TAS2R4	taste 2 receptor member 4		2.86
Q9NYV7	TAS2R16	taste 2 receptor member 16		2.86
Q9Y2T6	GPR55	G protein-coupled receptor 55		2.86
Q9NYW3	TAS2R7	taste 2 receptor member 7		2.86
Q9BXC0	HCAR1	hydroxycarboxylic acid receptor 1		2.86
O43741	PRKAB2	protein kinase, AMP-activated, beta 2 non-catalytic subunit			2.85
P08949	NMB	neuromedin B		2.85
Q8TDQ1	CD300LF	CD300 molecule like family member f		2.85
Q9Y336	SIGLEC9	sialic acid binding Ig-like lectin 9		2.85
P08922	ROS1	ROS proto-oncogene 1 , receptor tyrosine kinase		2.85
P49286	MTNR1B	melatonin receptor 1B		2.85
P06307	CCK	cholecystokinin		2.85
Q99705	MCHR1	melanin concentrating hormone receptor 1		2.84
Q969V1	MCHR2	melanin concentrating hormone receptor 2		2.84
Q92918	MAP4K1	mitogen-activated protein kinase kinase kinase kinase 1	2.84
Q9H3N8	HRH4	histamine receptor H4		2.83
P21452	TACR2	tachykinin receptor 2		2.83
Q9UIQ6	LNPEP	leucyl/cystinyl aminopeptidase	2.83
Q9Y5N1	HRH3	histamine receptor H3		2.83
P41146	OPRL1	opiate receptor-like 1		2.83
P08908	HTR1A	5-hydroxytryptamine (serotonin) receptor 1A, G protein-coupled		2.83
P29371	TACR3	tachykinin receptor 3		2.83
P48048	KCNJ1	potassium channel, inwardly rectifying subfamily J, member 1			2.82
P08100	RHO	rhodopsin		2.82
P10747	CD28	CD28 molecule	2.81
P07492	GRP	gastrin-releasing peptide		2.81
Q969F8	KISS1R	KISS1 receptor		2.81
Q15726	KISS1	KiSS-1 metastasis-suppressor		2.81
O95399	UTS2	urotensin 2		2.81
Q9UKP6	UTS2R	urotensin 2 receptor		2.81
P22897	MRC1	mannose receptor, C type 1	2.8
O15259	NPHP1	nephronophthisis 1 (juvenile)			2.8
Q13018	PLA2R1	phospholipase A2 receptor 1	2.8
Q08116	RGS1	regulator of G-protein signaling 1	2.79
Q16602	CALCRL	calcitonin receptor like receptor		2.79
Q9NPP4	NLRC4	NLR family, CARD domain containing 4		2.78
O95665	NTSR2	neurotensin receptor 2		2.78
Q5H8C1	FREM1	FRAS1 related extracellular matrix 1		2.78
P30989	NTSR1	neurotensin receptor 1 (high affinity)		2.78
Q16581	C3AR1	complement component 3a receptor 1		2.77
Q6VY07	PACS1	phosphofurin acidic cluster sorting protein 1	2.77
Q6U736	OPN5	opsin 5		2.77
Q9HBX9	RXFP1	relaxin/insulin-like family peptide receptor 1		2.77
O14718	RRH	retinal pigment epithelium-derived rhodopsin homolog		2.77
P21554	CNR1	cannabinoid receptor 1 (brain)		2.77
Q9H1Y3	OPN3	opsin 3		2.77
P43403	ZAP70	zeta chain of T cell receptor associated protein kinase 70kDa	2.76
O15303	GRM6	glutamate receptor, metabotropic 6		2.76
Q9NZH6	IL37	interleukin 37		2.76
Q14416	GRM2	glutamate receptor, metabotropic 2		2.76
P04090	RLN2	relaxin 2		2.76
Q8WXD0	RXFP2	relaxin/insulin-like family peptide receptor 2		2.75
Q5EG05	CARD16	caspase recruitment domain family member 16		2.75
Q15848	ADIPOQ	adiponectin, C1Q and collagen domain containing		2.75
P20366	TAC1	tachykinin precursor 1		2.75
Q13585	GPR50	G protein-coupled receptor 50		2.75
P06870	KLK1	kallikrein 1			2.74
P49190	PTH2R	parathyroid hormone 2 receptor		2.74
O60894	RAMP1	receptor (G protein-coupled) activity modifying protein 1		2.74
P35368	ADRA1B	adrenoceptor alpha 1B		2.74
P32745	SSTR3	somatostatin receptor 3		2.74
O60674	JAK2	Janus kinase 2		2.74
P00738	HP	haptoglobin			2.73
O95256	IL18RAP	interleukin 18 receptor accessory protein		2.73
Q9NPF7	IL23A	interleukin 23 subunit alpha		2.73
Q96A98	PTH2	parathyroid hormone 2		2.72
Q13639	HTR4	5-hydroxytryptamine (serotonin) receptor 4, G protein-coupled		2.72
O00187	MASP2	mannan-binding lectin serine peptidase 2			2.72
Q6EMK4	VASN	vasorin	2.72
Q14242	SELPLG	selectin P ligand			2.72
P34969	HTR7	5-hydroxytryptamine (serotonin) receptor 7, adenylate cyclase-coupled		2.72
Q9BXN1	ASPN	asporin	2.72
P13489	RNH1	ribonuclease/angiogenin inhibitor 1			2.72
Q15743	GPR68	G protein-coupled receptor 68		2.71
O14843	FFAR3	free fatty acid receptor 3		2.71
Q15077	P2RY6	pyrimidinergic receptor P2Y, G-protein coupled, 6		2.71
Q9UHM6	OPN4	opsin 4		2.71
P12872	MLN	motilin		2.71
O00189	AP4M1	adaptor related protein complex 4, mu 1 subunit	2.71
O43612	HCRT	hypocretin (orexin) neuropeptide precursor		2.71
Q5T6X5	GPRC6A	G protein-coupled receptor, class C, group 6, member A		2.71
Q9Y5X5	NPFFR2	neuropeptide FF receptor 2		2.71
Q02643	GHRHR	growth hormone releasing hormone receptor		2.7
P28222	HTR1B	5-hydroxytryptamine (serotonin) receptor 1B, G protein-coupled		2.7
O14745	SLC9A3R1	solute carrier family 9, subfamily A (NHE3, cation proton antiporter 3), member 3 regulator 1			2.7
Q86SG6	NEK8	NIMA-related kinase 8	2.7
P01286	GHRH	growth hormone releasing hormone		2.7
Q9UBD9	CLCF1	cardiotrophin-like cytokine factor 1			2.7
P30872	SSTR1	somatostatin receptor 1		2.7
P25103	TACR1	tachykinin receptor 1		2.69
P32247	BRS3	bombesin like receptor 3		2.68
P41143	OPRD1	opioid receptor, delta 1		2.68
P41240	CSK	c-src tyrosine kinase	2.68
P34981	TRHR	thyrotropin-releasing hormone receptor		2.68
P21730	C5AR1	complement component 5a receptor 1		2.68
P32239	CCKBR	cholecystokinin B receptor		2.68
P10092	CALCB	calcitonin-related polypeptide beta		2.68
P54646	PRKAA2	protein kinase, AMP-activated, alpha 2 catalytic subunit			2.68
Q92847	GHSR	growth hormone secretagogue receptor		2.68
P34982	OR1D2	olfactory receptor family 1 subfamily D member 2		2.67
P43088	PTGFR	prostaglandin F receptor (FP)		2.67
P21917	DRD4	dopamine receptor D4		2.66
Q9ULV8	CBLC	Cbl proto-oncogene C, E3 ubiquitin protein ligase			2.66
P18089				2.66
O94810	RGS11	regulator of G-protein signaling 11		2.66
Q14831	GRM7	glutamate receptor, metabotropic 7		2.66
Q99527	GPER1	G protein-coupled estrogen receptor 1		2.66
P29459	IL12A	interleukin 12A	2.66
O75154	RAB11FIP3	RAB11 family interacting protein 3 (class II)			2.65
Q99665	IL12RB2	interleukin 12 receptor subunit beta 2	2.65
P09683	SCT	secretin		2.65
P43681	CHRNA4	cholinergic receptor, nicotinic alpha 4		2.65
P48546	GIPR	gastric inhibitory polypeptide receptor		2.64
Q9BPW8	NIPSNAP1	nipsnap homolog 1 (C. elegans)		2.64
P07477	PRSS1	protease, serine 1	2.64
P14138	EDN3	endothelin 3		2.63
P20800	EDN2	endothelin 2		2.63
Q8NE00	TMEM104	transmembrane protein 104	2.62
P18405	SRD5A1	steroid-5-alpha-reductase, alpha polypeptide 1 (3-oxo-5 alpha-steroid delta 4-dehydrogenase alpha 1)			2.62
Q6ZN17	LIN28B	lin-28 homolog B (C. elegans)	2.62
O60896	RAMP3	receptor (G protein-coupled) activity modifying protein 3		2.62
P41587	VIPR2	vasoactive intestinal peptide receptor 2		2.62
Q9H8P0	SRD5A3	steroid 5 alpha-reductase 3			2.62
P21462	FPR1	formyl peptide receptor 1		2.62
P31213	SRD5A2	steroid-5-alpha-reductase, alpha polypeptide 2 (3-oxo-5 alpha-steroid delta 4-dehydrogenase alpha 2)			2.62
Q8IWQ3	BRSK2	BR serine/threonine kinase 2			2.61
Q8TDC3	BRSK1	BR serine/threonine kinase 1			2.61
P00813	ADA	adenosine deaminase		2.61
P20396	TRH	thyrotropin-releasing hormone		2.61
Q9H7D7	WDR26	WD repeat domain 26		2.6
Q9NSY2	STARD5	StAR related lipid transfer domain containing 5		2.59
P51808	DYNLT3	dynein, light chain, Tctex-type 3	2.59
P57771	RGS8	regulator of G-protein signaling 8		2.59
O95721	SNAP29	synaptosome associated protein 29kDa			2.59
P32238	CCKAR	cholecystokinin A receptor		2.59
P33032	MC5R	melanocortin 5 receptor		2.58
P41968	MC3R	melanocortin 3 receptor		2.58
P41595	HTR2B	5-hydroxytryptamine (serotonin) receptor 2B, G protein-coupled		2.57
P50406	HTR6	5-hydroxytryptamine (serotonin) receptor 6, G protein-coupled		2.57
P30874	SSTR2	somatostatin receptor 2		2.57
P43657	LPAR6	lysophosphatidic acid receptor 6		2.57
Q14774	HLX	H2.0-like homeobox		2.57
P37288	AVPR1A	arginine vasopressin receptor 1A		2.57
Q13075	NAIP	NLR family, apoptosis inhibitory protein		2.56
Q15722	LTB4R	leukotriene B4 receptor		2.56
Q92896	GLG1	golgi glycoprotein 1		2.56
Q9UHF0	TAC3	tachykinin 3		2.56
Q13131	PRKAA1	protein kinase, AMP-activated, alpha 1 catalytic subunit			2.56
P47871	GCGR	glucagon receptor		2.56
Q12968	NFATC3	nuclear factor of activated T-cells, cytoplasmic, calcineurin-dependent 3		2.56
Q8TDV5	GPR119	G protein-coupled receptor 119		2.55
P14784	IL2RB	interleukin 2 receptor subunit beta		2.55
P47804	RGR	retinal G protein coupled receptor		2.55
Q5UE93	PIK3R6	phosphoinositide-3-kinase regulatory subunit 6		2.55
P47900	P2RY1	purinergic receptor P2Y, G-protein coupled, 1		2.55
P41145	OPRK1	opioid receptor, kappa 1		2.55
P78508	KCNJ10	potassium channel, inwardly rectifying subfamily J, member 10		2.54
P35348	ADRA1A	adrenoceptor alpha 1A		2.54
P01210	PENK	proenkephalin		2.54
Q99712	KCNJ15	potassium channel, inwardly rectifying subfamily J, member 15		2.54
P28335	HTR2C	5-hydroxytryptamine (serotonin) receptor 2C, G protein-coupled		2.53
P08913	ADRA2A	adrenoceptor alpha 2A		2.53
P30968	GNRHR	gonadotropin releasing hormone receptor		2.53
P01350	GAST	gastrin		2.52
P28223	HTR2A	5-hydroxytryptamine (serotonin) receptor 2A, G protein-coupled		2.52
Q9H596	DUSP21	dual specificity phosphatase 21		2.51
P33681	CD80	CD80 molecule	2.51
Q8NEJ0	DUSP18	dual specificity phosphatase 18		2.51
P21728	DRD1	dopamine receptor D1		2.51
P30518	AVPR2	arginine vasopressin receptor 2		2.51
Q13324	CRHR2	corticotropin releasing hormone receptor 2		2.51
Q9UKV5	AMFR	autocrine motility factor receptor, E3 ubiquitin protein ligase			2.51
Q96MM3	ZFP42	ZFP42 zinc finger protein		2.51
Q9P296	C5AR2	complement component 5a receptor 2			2.5
Q02833	RASSF7	Ras association (RalGDS/AF-6) domain family (N-terminal) member 7			2.5
Q13568	IRF5	interferon regulatory factor 5		2.5
P56962	STX17	syntaxin 17			2.5
P35346	SSTR5	somatostatin receptor 5		2.5
O15539	RGS5	regulator of G-protein signaling 5		2.5
P23469	PTPRE	protein tyrosine phosphatase, receptor type, E		2.5
Q8NEV9	IL27	interleukin 27		2.5
Q96GW7	BCAN	brevican	2.5
Q9Y279	VSIG4	V-set and immunoglobulin domain containing 4			2.49
P01270	PTH	parathyroid hormone		2.49
P42701	IL12RB1	interleukin 12 receptor subunit beta 1	2.49
Q9BXR6	CFHR5	complement factor H-related 5			2.49
P69905	HBA2	hemoglobin subunit alpha 2			2.48
Q01718	MC2R	melanocortin 2 receptor (adrenocorticotropic hormone)		2.48
P27797	CALR	calreticulin	2.48
P63010	AP2B1	adaptor related protein complex 2, beta 1 subunit	2.48
Q8IU54	IFNL1	interferon, lambda 1		2.48
Q08426	EHHADH	enoyl-CoA, hydratase/3-hydroxyacyl CoA dehydrogenase		2.48
O43679	LDB2	LIM domain binding 2		2.47
Q96CW1	AP2M1	adaptor related protein complex 2, mu 1 subunit	2.47
Q03431	PTH1R	parathyroid hormone 1 receptor		2.47
O14829	PPEF1	protein phosphatase, EF-hand calcium binding domain 1		2.47
P42081	CD86	CD86 molecule	2.46
P21918	DRD5	dopamine receptor D5		2.46
P04070	PROC	protein C, inactivator of coagulation factors Va and VIIIa		2.46
P10997	IAPP	islet amyloid polypeptide		2.46
P55916	UCP3	uncoupling protein 3 (mitochondrial, proton carrier)		2.46
Q9NX02	NLRP2	NLR family, pyrin domain containing 2		2.46
O95363	FARS2	phenylalanyl-tRNA synthetase 2, mitochondrial			2.45
P03999	OPN1SW	opsin 1 (cone pigments), short-wave-sensitive		2.45
Q8WTV0	SCARB1	scavenger receptor class B member 1			2.45
O95150	TNFSF15	tumor necrosis factor superfamily member 15		2.45
Q9NS28	RGS18	regulator of G-protein signaling 18		2.45
O95782	AP2A1	adaptor related protein complex 2, alpha 1 subunit	2.44
P01222	TSHB	thyroid stimulating hormone, beta		2.44
P51460	INSL3	insulin like 3		2.44
P01589	IL2RA	interleukin 2 receptor subunit alpha		2.44
Q92643	PIGK	phosphatidylinositol glycan anchor biosynthesis class K		2.44
Q14832	GRM3	glutamate receptor, metabotropic 3		2.44
P84077	ARF1	ADP ribosylation factor 1	2.44
Q9NNW5	WDR6	WD repeat domain 6			2.44
Q96Q80	DERL3	derlin 3			2.43
O94973	AP2A2	adaptor related protein complex 2, alpha 2 subunit	2.43
P30990	NTS	neurotensin		2.43
P52630	STAT2	signal transducer and activator of transcription 2		2.43
P01833	PIGR	polymeric immunoglobulin receptor		2.43
P30988	CALCR	calcitonin receptor		2.43
P05155	SERPING1	serpin peptidase inhibitor, clade G (C1 inhibitor), member 1			2.43
P09210	GSTA2	glutathione S-transferase alpha 2	2.42
P08263	GSTA1	glutathione S-transferase alpha 1	2.42
P35408	PTGER4	prostaglandin E receptor 4		2.42
Q96GF1	RNF185	ring finger protein 185			2.42
P28325	CST5	cystatin D	2.41
P34998	CRHR1	corticotropin releasing hormone receptor 1		2.41
Q12841	FSTL1	follistatin like 1	2.41
Q6IA86	ELP2	elongator acetyltransferase complex subunit 2		2.41
Q12981	BNIP1	BCL2/adenovirus E1B 19kDa interacting protein 1	2.4
P41586	ADCYAP1R1	adenylate cyclase activating polypeptide 1 (pituitary) receptor type I		2.4
Q00610	CLTC	clathrin, heavy chain (Hc)	2.4
O00161	SNAP23	synaptosome associated protein 23kDa			2.4
P42226	STAT6	signal transducer and activator of transcription 6, interleukin-4 induced		2.4
Q1HG44	DUOXA2	dual oxidase maturation factor 2		2.39
P29508	SERPINB3	serpin peptidase inhibitor, clade B (ovalbumin), member 3	2.39
P25105	PTAFR	platelet-activating factor receptor		2.39
P09693	CD3G	CD3g molecule, gamma (CD3-TCR complex)	2.39
Q9BXJ7	AMN	amnion associated transmembrane protein	2.38
Q9NYY8	FASTKD2	FAST kinase domains 2			2.38
Q9H4M9	EHD1	EH domain containing 1			2.38
O00148	DDX39A	DEAD (Asp-Glu-Ala-Asp) box polypeptide 39A		2.38
P31785	IL2RG	interleukin 2 receptor subunit gamma		2.38
P06881	CALCA	calcitonin-related polypeptide alpha		2.37
Q9ULZ3	PYCARD	PYD and CARD domain containing		2.37
P25063					2.37
Q9ULA0	DNPEP	aspartyl aminopeptidase	2.37
P01258	CALCA	calcitonin-related polypeptide alpha		2.37
P48357	LEPR	leptin receptor		2.36
Q16829	DUSP7	dual specificity phosphatase 7		2.36
P07478	PRSS2	protease, serine 2	2.36
P41180	CASR	calcium-sensing receptor		2.36
O75431	MTX2	metaxin 2			2.35
Q15833	STXBP2	syntaxin binding protein 2			2.35
Q6Q788	APOA5	apolipoprotein A-V		2.35
Q8WTR2	DUSP19	dual specificity phosphatase 19		2.35
P08246	ELANE	elastase, neutrophil expressed			2.34
Q01629	IFITM2	interferon induced transmembrane protein 2		2.34
P30041	PRDX6	peroxiredoxin 6	2.34
Q99677	LPAR4	lysophosphatidic acid receptor 4		2.34
Q6WKZ4	RAB11FIP1	RAB11 family interacting protein 1 (class I)			2.34
Q9UBS5	GABBR1	gamma-aminobutyric acid (GABA) B receptor, 1		2.34
Q8NFG4	FLCN	folliculin			2.34
Q13094	LCP2	lymphocyte cytosolic protein 2	2.34
Q8IY21	DDX60	DEAD (Asp-Glu-Ala-Asp) box polypeptide 60		2.34
P11488	GNAT1	guanine nucleotide binding protein (G protein), alpha transducing activity polypeptide 1		2.34
P09496	CLTA	clathrin, light chain A	2.33
P24530	EDNRB	endothelin receptor type B		2.33
Q16690	DUSP5	dual specificity phosphatase 5		2.33
Q9Y6W6	DUSP10	dual specificity phosphatase 10		2.33
Q99956	DUSP9	dual specificity phosphatase 9		2.33
O43914	TYROBP	TYRO protein tyrosine kinase binding protein	2.33
Q01344	IL5RA	interleukin 5 receptor subunit alpha		2.32
